# Supplementary material for: A copper-catalyzed asymmetric Friedel–Crafts hydroxyalkylation of pyrazole-4,5-diones with 5-aminoisoxazoles
Source: Royal Society of Chemistry journal article supplement (doi:10.1039/d4ob00322e), 2024-01-01
Supplement: d4ob00322e1.pdf [file d4ob00322e1.pdf]

## Supporting Information

### **Copper-Catalyzed Asymmetric Friedel-Crafts Hydroxyalkylation of Pyrazole-4,5-diones with 5-Aminoisoxazoles**

Siyu Gao, Xiang Sun, Sijie Peng, Zhenggen Zha, Qi Sun\* and Zhiyong Wang\*

*Hefei National Center for Physical Sciences at Microscale, Key Laboratory of Precision and Intelligent Chemistry,  
School of Chemistry and Materials Science, University of Science and Technology of China, Hefei 230026, China.*

Fax: (+86)551-63603185

E-mail: zwang3@ustc.edu.cn

## Table of Contents

|                                                                                             |             |
|---------------------------------------------------------------------------------------------|-------------|
| <b>Part I Experimental Section .....</b>                                                    | <b>S1</b>   |
| <b>1.1 General information .....</b>                                                        | <b>S1</b>   |
| <b>1.2 General procedure for the synthesis of substrate .....</b>                           | <b>S1</b>   |
| <b>1.3 Optimization of reaction conditions. ....</b>                                        | <b>S6</b>   |
| <b>1.4 General working procedure .....</b>                                                  | <b>S8</b>   |
| <b>1.5 Experimental data of products .....</b>                                              | <b>S9</b>   |
| <b>1.6 A plausible structure of the transition state and DFT<br/>    calculations. ....</b> | <b>S23</b>  |
| <b>Part II NMR spectra .....</b>                                                            | <b>S35</b>  |
| <b>Part III HPLC Spectra .....</b>                                                          | <b>S93</b>  |
| <b>Part IV Crystal Preparation and the data .....</b>                                       | <b>S118</b> |

# Part I Experimental Section

## 1.1 General information

$^1\text{H}$  NMR and  $^{13}\text{C}$  NMR were recorded on Bruker-500 MHz Spectrometer ( $^1\text{H}$  NMR: 500MHz,  $^{13}\text{C}$  NMR: 125MHz,  $^{19}\text{F}$  NMR: 470MHz) using TMS as internal reference. The chemical shifts ( $\delta$ ) and coupling constants (J) were expressed in ppm and Hz respectively. Uv-Vis Spectrophotometry was carried out on Shimadzu UV-3000. HPLC analysis was carried out on an Agilent 1260 series HPLC with a multiple wavelength detector. Chiralpak AD-H, IC were purchased from Daicel Chemical Industries, LTD. Optical rotations were measured on a PerKinElmer<sup>TM</sup> Polarimeter (Model 343). HRMS (ESI) were recorded on a Waters<sup>TM</sup> Q-TOF Premier. Single crystal data was collected at room temperature on a Rigaku Oxford Diffraction SuperNova with an AtlasS2 CCD using Cu K $\alpha$  radiation. Commercially available compounds were used without further purification. Commercially available compounds were used without further purification. All solvents were purified according to the standard procedures unless otherwise noted. Ligands **L**<sub>1</sub>-**L**<sub>4</sub><sup>[S1]</sup>, **L**<sub>1</sub>'<sup>[S2]</sup>, pyrazole-4,5-diones **1**<sup>[S3]</sup>, 5-aminoisoxazoles **2**<sup>[S4]</sup> were prepared according to the literature procedures.

## 1.2 General procedure for the synthesis of substrate

### 1.2.1 General procedure for the synthesis of pyrazole-4,5-diones **1a-v**<sup>[S5]</sup>

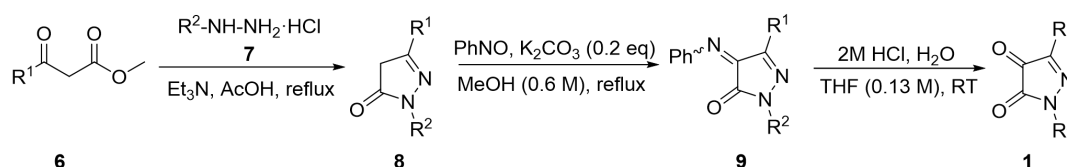

To a solution of **7** (20 mmol, 1.0 equiv.) in glacial acetic acid (30 mL) was added **6** (20 mmol, 1.0 equiv.) and Triethylamine (20 mmol, 1.0 equiv.). The reaction mixture was stirred at 110 °C until TLC (petroleum ether/ ethyl acetate = 2:1) showed complete consumption of the starting material. After cooling to room temperature, the mixture was quenched with a solution of saturated  $\text{NaHCO}_3$  and extracted with EtOAc, the organic layer was washed with brine and dried with anhydrous sodium sulfate and evaporated under reduced pressure. The crude product was purified by column chromatography to afford **8**.

Add  $\text{PhNO}$  (1.0 equiv.) to a solution of pyrazolon derivative **8** (1.0 equiv.) in  $\text{MeOH}$  (0.6 M) and the  $\text{K}_2\text{CO}_3$  (0.2 equiv.) was added at once, the mixture was

refluxed for 3 hours. The solvent was removed under reduced pressure and the crude product was directly purified by flash column chromatography (petroleum ether/ ethyl acetate = 30:1) to afford the desired product **9**.

To a solution of pyrazolon-derived phenyl-ketimine **9** in THF (0.13 M), 2 M HCl was added and stirring at room temperature. After stirring for 10 minutes - 5.5 hours, water was added. The reaction mixture was extracted with DCM (3×20 mL) and the combined organic layers were dried over Na<sub>2</sub>SO<sub>4</sub>. The solvent was removed under reduced pressure and the crude product was directly purified by flash column chromatography (petroleum ether/ ethyl acetate = 20:1) to afford the desired product **1**.

### 1.2.2 General procedure for the synthesis of 5-aminoisoxazoles **2a-n** [S4]

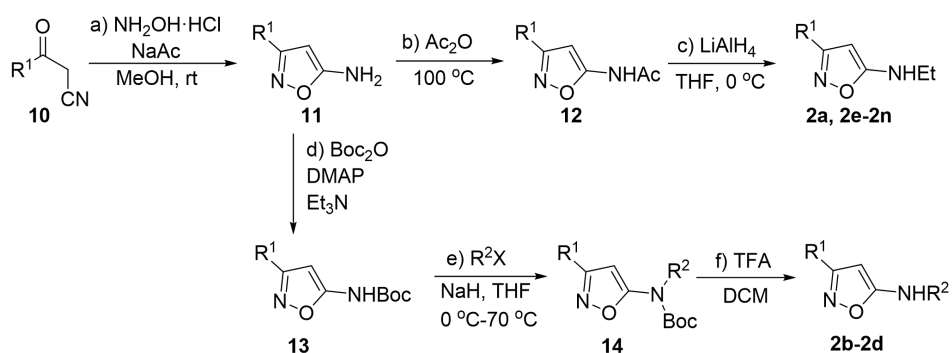

a) NH<sub>2</sub>OH · HCl (1.3 g, 18.8 mmol) and NaOAc (1.55 g, 18.8 mmol) were stirred in MeOH (20 mL) at room temperature for 1 hour and then the compound **10** (6.3 mmol) was added to the mixture. The reaction mixture was stirred at room temperature overnight. Then the reaction mixture was quenched with water and extracted with EtOAc, the organic layer was washed with brine and dried with anhydrous sodium sulfate and evaporated under reduced pressure. The crude product was purified by column chromatography to afford **11**.

b) Compound **11** (500 mg, 3 mmol) was stirred in acetic anhydride (6 mL) at 100 °C for 2h. The reaction mixture was quenched with a solution of saturated NaHCO<sub>3</sub> and extracted with EtOAc, the organic layer was washed with brine and dried with anhydrous sodium sulfate and evaporated under reduced pressure. The crude product was purified by column chromatography to afford **12**.

c) The compound **12** (500 mg, 2 mmol) was dried in vacuum and then dissolved in dry THF (10 mL) at 0 °C. Lithium aluminium hydride (240 mg, 6 mmol) was added during 20 minutes. The reaction was then stirred at room temperature overnight. Next, the reaction mixture was quenched by slow addition of 1M NaOH solution at 0 °C. The mixture was stirred for 30 minutes and then filtered through a pad of Celite. The filtrate was extracted with EtOAc, the organic layer was washed with brine and dried with anhydrous sodium sulfate and evaporated under reduced pressure. The crude product was purified by column chromatography to afford **2a, 2e-n**.

d) To a solution of compound **11** (1 g, 4 mmol), Boc<sub>2</sub>O (2.3 g, 10 mmol) and DMAP (50 mg, 0.4 mmol) in 30 mL of DCM add triethylamine (1.27 g, 12 mmol) dropwise and stirred overnight at room temperature. The reaction was diluted with DCM. The organic layer was washed with water, dried over anhydrous Na<sub>2</sub>SO<sub>4</sub> and concentrated under reduced pressure. The residue was purified by column chromatography on silica gel. (PE/EA = 10/1) to give compound **13** as a white solid.

e) To a stirred solution of **13** (1 mmol) in dry THF (5 mL) at 0°C, NaH(80 mg, 2 mmol) was added and stirred for 30 min. R<sub>2</sub>X (2 mmol) was added dropwise to the reaction mixture. The reaction mixture was then stirred at 70 °C overnight. The reaction mixture was quenched with EtOAc, washed with water, dried over anhydrous sodium sulfate and evaporated under reduced pressure. The crude product was purified by column chromatography to afford **14**.

f) To a stirred solution of **14** (1 mmol) in DCM at room temperature, TFA(5 mmol) was added and stirred for 8h. The reaction mixture was quenched with a solution of saturated NaHCO<sub>3</sub> and extracted with DCM, the organic layer was washed with brine and dried with anhydrous sodium sulfate and evaporated under reduced pressure. The crude product was purified by column chromatography to afford **2b-d**.

### 3-isopropyl-1-(p-tolyl)-1H-pyrazole-4,5-dione(1d)

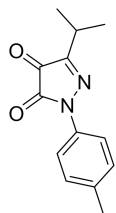

The title compound was prepared according to the general working procedure and purified by column chromatography (PE/EA = 10/1) to give the product as a red solid. <sup>1</sup>H NMR (500 MHz, CDCl<sub>3</sub>) δ 7.75 (d, J = 8.6 Hz, 2H), 7.24 (d, J = 8.6 Hz, 2H), 2.94 (hept, J = 6.9 Hz, 1H), 2.37 (s, 3H), 1.33 (d, J = 6.9 Hz, 6H). <sup>13</sup>C NMR (125 MHz, CDCl<sub>3</sub>) δ 184.8, 151.1, 149.0, 136.1, 134.6, 129.7, 117.8, 26.9, 21.1, 19.0.

### 3-isopropyl-1-(4-methoxyphenyl)-1H-pyrazole-4,5-dione(1e)

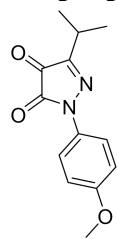

The title compound was prepared according to the general working procedure and purified by column chromatography (PE/EA = 10/1) to give the product as a red solid. <sup>1</sup>H NMR (500 MHz, CDCl<sub>3</sub>) δ 7.82-7.75 (m, 2H), 7.00-6.94 (m, 2H), 3.84 (s, 3H), 2.94 (hept, J = 6.9 Hz, 1H), 1.33 (d, J = 6.9 Hz, 6H). <sup>13</sup>C NMR (125 MHz, CDCl<sub>3</sub>) δ 185.0, 157.8, 151.1, 148.8, 130.3, 119.6, 114.3, 55.5, 26.9, 19.0.

### 1-(4-chlorophenyl)-3-isopropyl-1H-pyrazole-4,5-dione(1f)

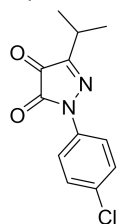

The title compound was prepared according to the general working procedure and purified by column chromatography (PE/EA = 10/1) to give the product as a red solid. <sup>1</sup>H NMR (500 MHz, CDCl<sub>3</sub>) δ 7.90-7.84 (m, 2H), 7.44-7.38 (m, 2H), 2.96 (hept, J = 7.0 Hz, 1H), 1.34 (d, J = 6.9 Hz, 6H). <sup>13</sup>C NMR (125 MHz, CDCl<sub>3</sub>) δ 184.2, 151.6, 149.1, 135.5, 131.4,

129.3, 118.8, 26.9, 19.0.

### 1-(4-fluorophenyl)-3-isopropyl-1H-pyrazole-4,5-dione(1g)

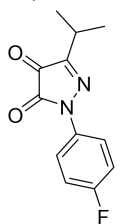

The title compound was prepared according to the general working procedure and purified by column chromatography (PE/EA = 10/1) to give the product as a red solid. <sup>1</sup>H NMR (500 MHz, CDCl<sub>3</sub>) δ 7.91-7.84 (m, 2H), 7.18-7.10 (m, 2H), 2.96 (hept, J = 6.9 Hz, 1H), 1.33 (d, J = 6.9 Hz, 6H). <sup>13</sup>C NMR (125 MHz, CDCl<sub>3</sub>) δ 184.4, 160.5 (d, J = 246.3 Hz), 151.4, 149.0, 133.1 (d, J = 3.0 Hz), 119.6 (d, J = 8.4 Hz), 116.0 (d, J = 23.0 Hz), 26.9, 19.0. <sup>19</sup>F NMR (470 MHz, CDCl<sub>3</sub>) δ -115.29.

### 1-(4-bromophenyl)-3-isopropyl-1H-pyrazole-4,5-dione(1h)

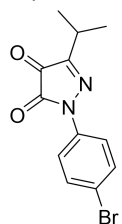

The title compound was prepared according to the general working procedure and purified by column chromatography (PE/EA = 10/1) to give the product as a red solid. <sup>1</sup>H NMR (500 MHz, CDCl<sub>3</sub>) δ 7.82 (d, J = 9.0 Hz, 2H), 7.57 (d, J = 9.0 Hz, 2H), 2.96 (hept, J = 7.0 Hz, 1H), 1.34 (d, J = 6.9 Hz, 6H). <sup>13</sup>C NMR (125 MHz, CDCl<sub>3</sub>) δ 184.2, 151.6, 149.1, 136.0, 132.2, 119.2, 119.1, 26.9, 19.0.

### 3-isopropyl-1-(4-(trifluoromethyl)phenyl)-1H-pyrazole-4,5-dione(1i)

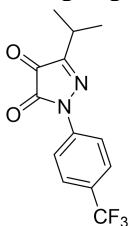

The title compound was prepared according to the general working procedure and purified by column chromatography (PE/EA = 10/1) to give the product as a red solid. <sup>1</sup>H NMR (500 MHz, CDCl<sub>3</sub>) δ 8.06 (d, J = 8.8 Hz, 2H), 7.71 (d, J = 8.9 Hz, 2H), 2.99 (hept, J = 6.9 Hz, 1H), 1.35 (s, 6H). <sup>13</sup>C NMR (125 MHz, CDCl<sub>3</sub>) δ 183.8, 152.0, 149.4, 139.6, 127.8 (q, J = 32.7 Hz), 126.5 (q, J = 4.0 Hz), 123.9 (q, J = 272.0 Hz), 117.3, 27.0, 19.0. <sup>19</sup>F NMR (470 MHz, CDCl<sub>3</sub>) δ -62.31.

### 3-isopropyl-1-(m-tolyl)-1H-pyrazole-4,5-dione(1k)

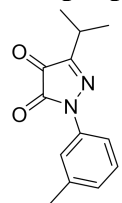

The title compound was prepared according to the general working procedure and purified by column chromatography (PE/EA = 10/1) to give the product as a red solid. <sup>1</sup>H NMR (500 MHz, CDCl<sub>3</sub>) δ 7.51-7.44 (m, 2H), 7.12 (t, J = 7.8 Hz, 1H), 6.90-6.84 (m, 1H), 2.74 (hept, J = 6.9 Hz, 1H), 2.21 (s, 3H), 1.13 (d, J = 6.9 Hz, 6H). <sup>13</sup>C NMR (125 MHz, CDCl<sub>3</sub>) δ 184.7, 151.2, 149.2, 139.2, 136.9, 129.0, 127.1, 118.3, 115.0, 26.9, 21.7, 19.1.

### 3-isopropyl-1-(3-methoxyphenyl)-1H-pyrazole-4,5-dione(1l)

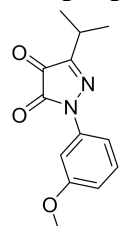

The title compound was prepared according to the general working procedure and purified by column chromatography (PE/EA = 10/1) to give the product as a red solid. <sup>1</sup>H NMR (500 MHz, CDCl<sub>3</sub>) δ 7.74-7.67 (m, 2H), 7.55 (t, J = 8.2 Hz, 1H), 7.01 (ddd, J = 8.3, 2.4, 0.9 Hz, 1H), 4.06 (s, 3H), 3.16 (hept, J = 6.9 Hz, 1H), 1.54 (d, J = 7.0 Hz, 6H). <sup>13</sup>C NMR (125

MHz, CDCl<sub>3</sub>)  $\delta$  183.4, 159.1, 150.2, 148.1, 137.0, 129.0, 110.7, 108.9, 102.5, 54.4, 25.8, 18.0.

### 1-(3-fluorophenyl)-3-isopropyl-1H-pyrazole-4,5-dione(1m)

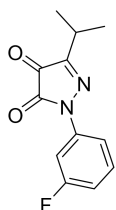

The title compound was prepared according to the general working procedure and purified by column chromatography (PE/EA = 10/1) to give the product as a red solid. <sup>1</sup>H NMR (500 MHz, CDCl<sub>3</sub>)  $\delta$  7.75 (ddd, J = 8.3, 2.1, 0.9 Hz, 1H), 7.67 (dt, J = 10.5, 2.3 Hz, 1H), 7.41 (td, J = 8.3, 6.3 Hz, 1H), 6.97 (tdd, J = 8.3, 2.5, 0.9 Hz, 1H), 2.97 (hept, J = 6.9 Hz, 1H), 1.34 (d, J = 6.9 Hz, 6H). <sup>13</sup>C NMR (125 MHz, CDCl<sub>3</sub>)  $\delta$  184.0, 162.9 (d, J = 245.5 Hz), 151.6, 149.2, 138.2 (d, J = 10.5 Hz), 130.5 (d, J = 9.1 Hz), 112.9 (d, J = 3.7 Hz), 112.9 (d, J = 21.1 Hz), 105.1 (d, J = 27.5 Hz), 26.9, 19.0. <sup>19</sup>F NMR (470 MHz, CDCl<sub>3</sub>)  $\delta$  -110.38.

### 1-(3-chlorophenyl)-3-isopropyl-1H-pyrazole-4,5-dione(1n)

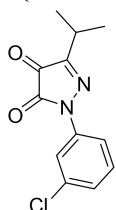

The title compound was prepared according to the general working procedure and purified by column chromatography (PE/EA = 10/1) to give the product as a red solid. <sup>1</sup>H NMR (500 MHz, CDCl<sub>3</sub>)  $\delta$  7.92-7.90 (m, 1H), 7.86 (ddd, J = 8.3, 2.1, 0.9 Hz, 1H), 7.41-7.34 (m, 1H), 7.24 (ddd, J = 8.0, 2.0, 0.9 Hz, 1H), 2.97 (hept, J = 6.9 Hz, 1H), 1.34 (d, J = 6.9 Hz, 6H). <sup>13</sup>C NMR (125 MHz, CDCl<sub>3</sub>)  $\delta$  184.0, 151.7, 149.2, 137.9, 135.0, 130.3, 126.2, 117.5, 115.5, 26.9, 19.0.

### 1-(3-bromophenyl)-3-isopropyl-1H-pyrazole-4,5-dione(1o)

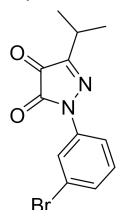

The title compound was prepared according to the general working procedure and purified by column chromatography (PE/EA = 10/1) to give the product as a red solid. <sup>1</sup>H NMR (500 MHz, CDCl<sub>3</sub>)  $\delta$  8.05 (t, J = 2.0 Hz, 1H), 7.91 (ddd, J = 8.2, 2.2, 1.0 Hz, 1H), 7.39 (ddd, J = 8.1, 1.9, 1.1 Hz, 1H), 7.32 (t, J = 8.1 Hz, 1H), 2.97 (hept, J = 6.9 Hz, 1H), 1.34 (d, J = 6.9 Hz, 6H). <sup>13</sup>C NMR (125 MHz, CDCl<sub>3</sub>)  $\delta$  184.0, 151.7, 149.2, 138.0, 130.5, 129.1, 122.9, 120.3, 116.0, 27.0, 19.0.

### 3-isopropyl-1-(3-nitrophenyl)-1H-pyrazole-4,5-dione(1q)

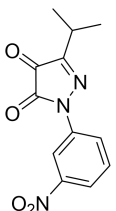

The title compound was prepared according to the general working procedure and purified by column chromatography (PE/EA = 10/1) to give the product as a red solid. <sup>1</sup>H NMR (500 MHz, CDCl<sub>3</sub>)  $\delta$  8.74 (t, J = 2.2 Hz, 1H), 8.38 (ddd, J = 8.2, 2.1, 0.9 Hz, 1H), 8.13 (ddd, J = 8.1, 2.2, 1.0 Hz, 1H), 7.65 (t, J = 8.2 Hz, 1H), 3.02 (hept, J = 6.9 Hz, 1H), 1.37 (d, J = 6.9 Hz, 6H). <sup>13</sup>C NMR (125 MHz, CDCl<sub>3</sub>)  $\delta$  183.5, 152.2, 149.4, 148.7, 137.8, 130.3, 122.9, 120.6, 112.3, 27.0, 19.0.

### 1-(3,5-dimethylphenyl)-3-isopropyl-1H-pyrazole-4,5-dione(1s)

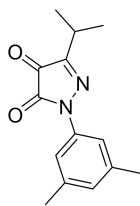

The title compound was prepared according to the general working procedure and purified by column chromatography (PE/EA = 10/1) to give the product as a red solid.  $^1\text{H}$  NMR (500 MHz,  $\text{CDCl}_3$ )  $\delta$  7.49 (s, 2H), 6.91 (s, 1H), 2.94 (hept,  $J = 6.9$  Hz, 1H), 2.37 (s, 6H), 1.33 (d,  $J = 7.0$  Hz, 6H).  $^{13}\text{C}$  NMR (125 MHz,  $\text{CDCl}_3$ )  $\delta$  183.7, 150.1, 148.1, 137.9, 135.8, 127.0, 114.5, 25.8, 20.5, 18.0.

### 1-(3,4-dichlorophenyl)-3-isopropyl-1H-pyrazole-4,5-dione(1t)

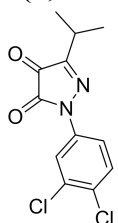

The title compound was prepared according to the general working procedure and purified by column chromatography (PE/EA = 10/1) to give the product as a red solid.  $^1\text{H}$  NMR (500 MHz,  $\text{CDCl}_3$ )  $\delta$  8.03 (d,  $J = 2.5$  Hz, 1H), 7.83 (dd,  $J = 8.9, 2.7$  Hz, 1H), 7.50 (d,  $J = 9.0$  Hz, 1H), 2.97 (hept,  $J = 6.9$  Hz, 1H), 1.35 (d,  $J = 6.9$  Hz, 6H).  $^{13}\text{C}$  NMR (125 MHz,  $\text{CDCl}_3$ )  $\delta$  182.6, 150.9, 148.1, 135.1, 132.2, 129.8, 128.6, 118.0, 115.6, 25.9, 17.9.

### 3-isopropyl-1-(naphthalen-2-yl)-1H-pyrazole-4,5-dione(1u)

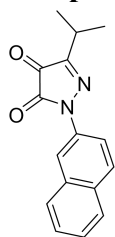

The title compound was prepared according to the general working procedure and purified by column chromatography (PE/EA = 10/1) to give the product as a red solid.  $^1\text{H}$  NMR (500 MHz,  $\text{CDCl}_3$ )  $\delta$  8.32 (s, 1H), 8.04 (dd,  $J = 8.9, 2.2$  Hz, 1H), 7.92-7.80 (m, 3H), 7.54-7.43 (m, 2H), 2.96 (hept,  $J = 6.9$  Hz, 1H), 1.36 (d,  $J = 6.9$  Hz, 6H).  $^{13}\text{C}$  NMR (125 MHz,  $\text{CDCl}_3$ )  $\delta$  184.6, 151.4, 149.3, 134.5, 133.3, 131.5, 129.2, 128.2, 127.8, 126.9, 126.0, 125.6, 116.8, 115.1, 27.0, 19.1.

### 3-isopropyl-1-methyl-1H-pyrazole-4,5-dione(1v)

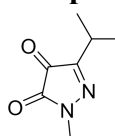

The title compound was prepared according to the general working procedure and purified by column chromatography (PE/EA = 10/1) to give the product as a red liquid.  $^1\text{H}$  NMR (500 MHz,  $\text{CDCl}_3$ )  $\delta$  3.39 (s, 3H), 2.81 (hept,  $J = 7.0$  Hz, 1H), 1.24 (d,  $J = 6.9$  Hz, 6H).  $^{13}\text{C}$  NMR (125 MHz,  $\text{CDCl}_3$ )  $\delta$  185.1, 150.4, 149.1, 31.8, 25.9, 18.4.

## 1.3 Optimization of reaction conditions.

Table S1. Effects of copper salts <sup>a</sup>



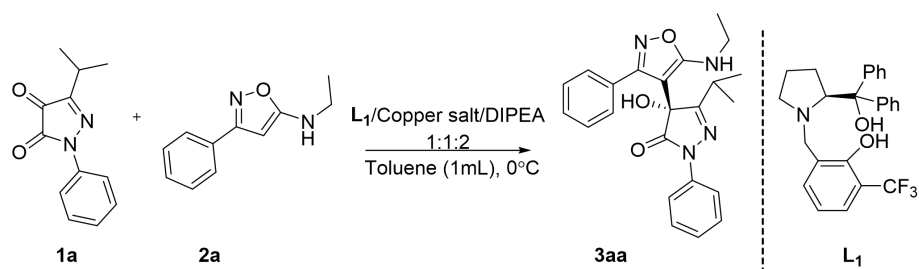

| Entry | Copper salt              | Yield (%) <sup>b</sup> | ee (%) <sup>c</sup> |
|-------|--------------------------|------------------------|---------------------|
| 1     | $CuSO_4 \cdot 5H_2O$     | 93                     | 50                  |
| 2     | $Cu(NO_3)_2 \cdot 3H_2O$ | 90                     | 50                  |
| 3     | $CuCl_2 \cdot 2H_2O$     | 92                     | 45                  |
| 4     | $CuBr_2$                 | 85                     | 48                  |
| 5     | $Cu(OAc)_2 \cdot H_2O$   | 78                     | 18                  |
| 6     | $Cu(OTf)_2$              | 86                     | 68                  |

<sup>a</sup> Unless otherwise noted, the reaction of **1a** (0.1 mmol) and **2a** (0.12 mmol) was performed in the presence of ligand (**L1**, 5 mol%), DIPEA (10 mol%) and copper salt (5 mol%) in solvent (1.0 mL) for 18 h. <sup>b</sup> Yield of the isolated product based on **1a**. <sup>c</sup> Enantiomeric excess was determined by HPLC analysis on a chiral stationary phase.

**Table S2.** Effects of aprotic polar solvent <sup>a</sup>

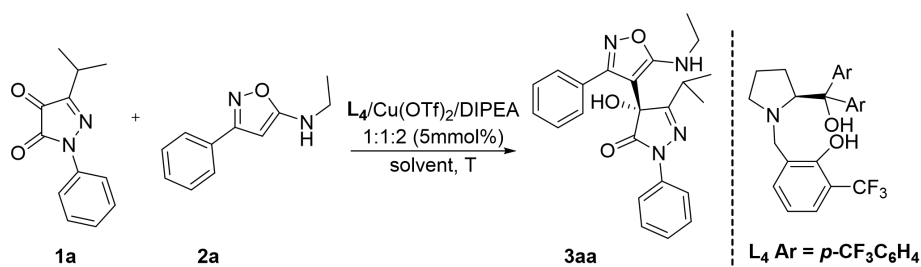

| Entry          | Solvent | T(°C) | Yield (%) <sup>b</sup> | ee (%) <sup>c</sup> |
|----------------|---------|-------|------------------------|---------------------|
| 1              | Tol     | -30   | 93                     | 99                  |
| 2              | DMF     | -30   | 83                     | 43                  |
| 3 <sup>d</sup> | DMSO    | 20    | 80                     | 49                  |
| 4              | Tol     | 20    | 93                     | 70                  |

<sup>a</sup> Unless otherwise noted, the reaction of **1a** (0.1 mmol) and **2a** (0.12 mmol) was performed in the presence of ligand (**L4**, 5 mol%), DIPEA (10 mol%) and copper salt (5 mol%) in solvent (1.0 mL) at -30 °C for 18 h. <sup>b</sup> Yield of the isolated product based on **1a**. <sup>c</sup> Enantiomeric excess was determined by HPLC analysis on a chiral stationary phase. <sup>d</sup> Due to the high freezing point of DMSO, the reaction was carried out at 20 °C.

## 1.4 General working procedure

### 1.4.1 Procedure for the Friedel-Crafts hydroxyalkylation product **3**

A mixture of  $\text{Cu}(\text{OTf})_2$  (1.8 mg, 0.005 mmol) and the ligand (**L**<sub>4</sub>, 2.8 mg, 0.005mmol) in toluene (1 mL) with DIPEA (1.74  $\mu\text{L}$ , 0.01 mmol) were stirred at room temperature for 2 h. pyrazole-4,5-diones **1** (0.1mmol) was then added and the resulting mixture was cooled to  $-30^\circ\text{C}$ . After stirring the mixture for 0.5 h, 5-aminoisoxazole **2** (0.12 mmol) was added in one portion. After the reaction was complete (monitored by TLC), the reaction mixture was evaporated in vacuo. Purification of the residue by column chromatography (petroleum ether/ ethyl acetate = 10:1) afforded the desired product **3** as a white solid.

### 1.4.2 Procedure for the Friedel-Crafts hydroxyalkylation on a gram scale

A mixture of  $\text{Cu}(\text{OTf})_2$  (36 mg, 0.01 mmol) and the ligand (**L**<sub>4</sub>, 56 mg, 0.01mmol) in toluene (40 mL) with DIPEA (34.8  $\mu\text{L}$ , 0.2 mmol) were stirred at room temperature for 2 h. pyrazole-4,5-diones **1a** (4mmol) was then added and the resulting mixture was cooled to  $-30^\circ\text{C}$ . After stirring the mixture for 0.5 h, 5-aminoisoxazole **2a** (4.8 mmol) was added in one portion. After the reaction was complete (monitored by TLC), the reaction mixture was evaporated in vacuo. Purification of the residue by column chromatography (petroleum ether/ ethyl acetate = 10:1) afforded the desired product **3aa** as a white solid.

### 1.4.3 Further transformation of the product **3aa**

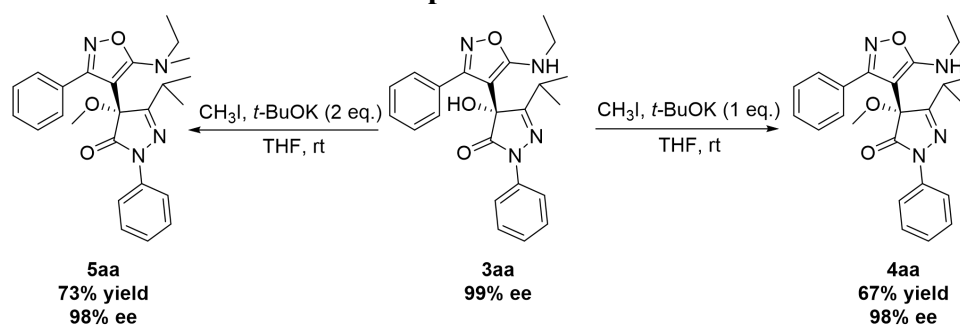

A mixture of **3aa** (40.4 mg, 0.1 mmol),  $t\text{-BuOK}$  (11.2mg, 0.1 mmol) and  $\text{CH}_3\text{I}$  (6.2 $\mu\text{L}$ , 0.1 mmol) in THF (1 mL) were stirred at room temperature. After the reaction was complete (monitored by TLC), the reaction mixture was evaporated in vacuo. Purification of the residue by column chromatography (petroleum ether/ ethyl acetate = 20:1) afforded the desired product **4aa** as a white solid.

A mixture of **3aa** (40.4 mg, 0.1 mmol),  $t\text{-BuOK}$  (22.4mg, 0.2 mmol) and  $\text{CH}_3\text{I}$  (12.4 $\mu\text{L}$ , 0.2 mmol) in THF (1 mL) were stirred at room temperature. After the

reaction was complete (monitored by TLC), the reaction mixture was evaporated in vacuo. Purification of the residue by column chromatography (petroleum ether/ ethyl acetate = 20:1) afforded the desired product **5aa** as a white solid.

## 1.5 Experimental data of products

### (R)-4-(5-(ethylamino)-3-phenylisoxazol-4-yl)-4-hydroxy-5-isopropyl-2-phenyl-2,4-dihydro-3H-pyrazol-3-one (**3aa**)

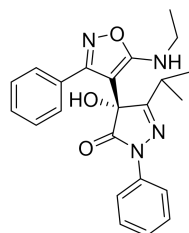

The title compound was prepared according to the general working procedure and purified by column chromatography (PE/EA = 10/1-5/1) to give the product as a white solid. 34.0 mg, 87% yield; 37.5 mg, 93% yield; mp = 157-159 °C;  $[\alpha]_D^{20}$  218.2 (c = 1.0, CHCl<sub>3</sub>, 99% ee); HPLC: Daicel Chiralpak IC, hexane: 2-propanol = 70:30, flow rate = 0.8 mL/min, T = 23°C, UV = 254 nm,  $t_R$  = 7.7 min (major),  $t_R$  = 9.6 min (minor); <sup>1</sup>H NMR (500 MHz, Acetone-d<sub>6</sub>) δ 7.58-7.53 (m, 2H), 7.37-7.29 (m, 2H), 7.18-7.06 (m, 6H), 6.59 (t, J = 6.0 Hz, 1H), 6.27 (s, 1H), 3.55-3.43 (m, 2H), 2.80 (hept, J = 6.9 Hz, 1H), 1.34-1.26 (m, 6H), 1.12-1.07 (m, 3H). <sup>13</sup>C NMR (125 MHz, Acetone-d<sub>6</sub>) δ 171.4, 169.1, 167.2, 161.6, 138.0, 129.4, 128.9, 128.5, 128.4, 127.9, 124.5, 118.1, 84.7, 77.3, 37.4, 28.3, 20.4, 19.7, 15.3. HRMS (ESI) m/z calcd for C<sub>23</sub>H<sub>24</sub>N<sub>4</sub>O<sub>3</sub> [M+H]<sup>+</sup> 405.1921, found 405.1927.

### (R)-5-ethyl-4-(5-(ethylamino)-3-phenylisoxazol-4-yl)-4-hydroxy-2-phenyl-2,4-dihydro-3H-pyrazol-3-one (**3ba**)

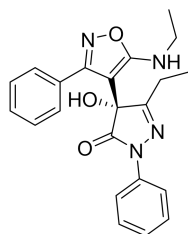

The title compound was prepared according to the general working procedure and purified by column chromatography (PE/EA = 10/1-5/1) to give the product as a white solid. 36.3 mg, 93% yield; mp = 165-168 °C;  $[\alpha]_D^{20}$  156.7 (c = 1.0, CHCl<sub>3</sub>, 95% ee); HPLC: Daicel Chiralpak IC, hexane: 2-propanol = 70:30, flow rate = 0.8 mL/min, T = 18°C, UV = 254 nm,  $t_R$  = 8.1 min (major),  $t_R$  = 10.0 min (minor); <sup>1</sup>H NMR (500 MHz, Acetone-d<sub>6</sub>) δ 7.59 (d, J = 8.1 Hz, 2H), 7.34 (t, J = 7.8 Hz, 2H), 7.23-7.17 (m, 1H), 7.17-7.10 (m, 5H), 6.55 (t, J = 6.1 Hz, 1H), 6.21 (s, 1H), 3.49 (p, J = 6.9 Hz, 2H), 2.53 (dq, J = 17.8, 7.3 Hz, 1H), 2.35 (dq, J = 17.8, 7.4 Hz, 1H), 1.31 (t, J = 7.2 Hz, 3H), 1.07 (t, J = 7.4 Hz, 3H). <sup>13</sup>C NMR (125 MHz, Acetone-d<sub>6</sub>) δ 171.6, 169.2, 164.5, 161.6, 138.1, 129.4, 129.0, 128.5, 128.4, 127.9, 124.5, 118.1, 84.5, 76.7, 37.4, 20.5, 15.2, 8.5. HRMS (ESI) m/z calcd for C<sub>22</sub>H<sub>22</sub>N<sub>4</sub>O<sub>3</sub> [M+H]<sup>+</sup> 391.1765, found 391.1771.

### (R)-4-(5-(ethylamino)-3-phenylisoxazol-4-yl)-4-hydroxy-5-methyl-2-phenyl-2,4-dihydro-3H-pyrazol-3-one (**3ca**)

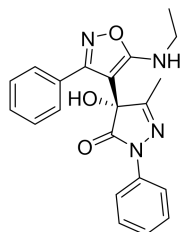

The title compound was prepared according to the general working

procedure and purified by column chromatography (PE/EA = 10/1-5/1) to give the product as a white solid. 34.6 mg, 92% yield; mp = 170-172 °C;  $[\alpha]_D^{20}$  192.9 (c = 1.0, CHCl<sub>3</sub>, 94% ee); HPLC: Daicel Chiralpak IC, hexane: 2-propanol = 70:30, flow rate = 0.8 mL/min, T = 23°C, UV = 254 nm,  $t_R$  = 9.4 min (major),  $t_R$  = 12.6 min (minor); <sup>1</sup>H NMR (500 MHz, Acetone-d<sub>6</sub>) δ 7.58-7.52 (m, 2H), 7.37-7.29 (m, 2H), 7.22-7.09 (m, 6H), 6.57 (s, 1H), 6.24 (s, 1H), 3.54-3.45 (m, 2H), 2.02 (s, 3H), 1.31 (t, J = 7.1 Hz, 3H). <sup>13</sup>C NMR (125 MHz, Acetone-d<sub>6</sub>) δ 171.3, 169.3, 161.6, 160.8, 137.9, 129.4, 129.0, 128.5, 128.4, 127.9, 124.5, 118.1, 84.2, 76.5, 37.4, 15.2, 12.3. HRMS (ESI) m/z calcd for C<sub>21</sub>H<sub>20</sub>N<sub>4</sub>O<sub>3</sub> [M+H]<sup>+</sup> 377.1608, found 377.1612.

**(R)-4-(5-(ethylamino)-3-phenylisoxazol-4-yl)-4-hydroxy-5-isopropyl-2-(p-tolyl)-2,4-dihydro-3H-pyrazol-3-one (3da)**

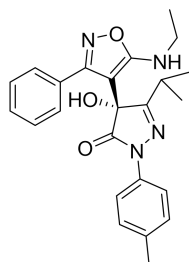

The title compound was prepared according to the general working procedure and purified by column chromatography (PE/EA = 10/1-5/1) to give the product as a white solid. 38.8 mg, 93% yield; mp = 158-159 °C;  $[\alpha]_D^{20}$  233.4 (c = 1.0, CHCl<sub>3</sub>, 96% ee); HPLC: Daicel Chiralpak IC, hexane: 2-propanol = 70:30, flow rate = 1.0 mL/min, T = 8°C, UV = 254 nm,  $t_R$  = 7.0 min (major),  $t_R$  = 9.7 min (minor); <sup>1</sup>H NMR (500 MHz, Acetone-d<sub>6</sub>) δ 7.46-7.39 (m, 2H), 7.21-7.07 (m, 7H), 6.59 (t, J = 6.3 Hz, 1H), 6.22 (s, 1H), 3.55-3.43 (m, 2H), 2.78 (hept, J = 6.9 Hz, 1H), 2.31 (s, 3H), 1.34-1.25 (m, 6H), 1.08 (d, J = 6.9 Hz, 3H). <sup>13</sup>C NMR (125 MHz, Acetone-d<sub>6</sub>) δ 171.1, 169.1, 167.0, 161.5, 135.6, 133.9, 129.4, 128.9, 128.8, 128.5, 127.9, 118.3, 84.7, 77.2, 37.4, 28.3, 20.4, 20.1, 19.6, 15.3. HRMS (ESI) m/z calcd for C<sub>24</sub>H<sub>26</sub>N<sub>4</sub>O<sub>3</sub> [M+Na]<sup>+</sup> 441.1897, found 441.1898.

**(R)-4-(5-(ethylamino)-3-phenylisoxazol-4-yl)-4-hydroxy-5-isopropyl-2-(4-methoxyphenyl)-2,4-dihydro-3H-pyrazol-3-one (3ea)**

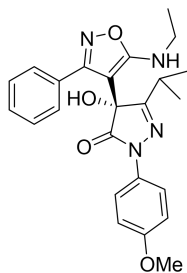

The title compound was prepared according to the general working procedure and purified by column chromatography (PE/EA = 10/1-5/1) to give the product as a white solid. 40.3 mg, 93% yield; mp = 158-160 °C;  $[\alpha]_D^{20}$  210.6 (c = 1.0, CHCl<sub>3</sub>, 96% ee); HPLC: Daicel Chiralpak IC, hexane: 2-propanol = 80:20, flow rate = 0.8 mL/min, T = 13°C, UV = 254 nm,  $t_R$  = 16.6 min (major),  $t_R$  = 22.8 min (minor); <sup>1</sup>H NMR (500 MHz, Acetone-d<sub>6</sub>) δ 7.46-7.40 (m, 2H), 7.24-7.10 (m, 5H), 6.92-6.86 (m, 2H), 6.58 (t, J = 6.2 Hz, 1H), 6.30-6.10 (m, 1H), 3.79 (s, 3H), 3.55-3.43 (m, 2H), 2.79 (hept, J = 6.9 Hz, 1H), 1.34-1.25 (m, 6H), 1.08 (d, J = 6.9 Hz, 3H). <sup>13</sup>C NMR (125 MHz, Acetone-d<sub>6</sub>) δ 170.8, 169.1, 167.0, 161.6, 156.8, 131.3, 129.5, 128.9, 128.5, 127.9, 119.9, 113.4, 84.7, 77.1, 54.8, 37.4, 28.2, 20.4, 19.7, 15.3. HRMS (ESI) m/z calcd for C<sub>24</sub>H<sub>26</sub>N<sub>4</sub>O<sub>4</sub> [M+H]<sup>+</sup> 435.2027, found 435.2033.

**(R)-2-(4-chlorophenyl)-4-(5-(ethylamino)-3-phenylisoxazol-4-yl)-4-hydroxy-5-isopropyl-2,4-dihydro-3H-pyrazol-3-one (3fa)**

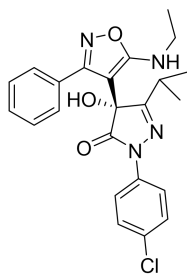

The title compound was prepared according to the general working procedure and purified by column chromatography (PE/EA = 10/1-5/1) to give the product as a white solid. 40.3 mg, 92% yield; mp = 176-179 °C;  $[\alpha]_D^{20}$  153.0 (c = 0.5, CHCl<sub>3</sub>, 95% ee); HPLC: Daicel Chiralpak IC, hexane: 2-propanol = 90:10, flow rate = 1.0 mL/min, T = 8°C, UV = 254 nm,  $t_R$  = 17.3 min (major),  $t_R$  = 23.2 min (minor); <sup>1</sup>H NMR (500 MHz, Acetone-d<sub>6</sub>) δ 7.60-7.53 (m, 2H), 7.38-7.32 (m, 2H), 7.19-7.07 (m, 5H), 6.60 (t, J = 6.2 Hz, 1H), 6.31 (s, 1H), 3.56-3.44 (m, 2H), 2.83 (hept, J = 7.0 Hz, 1H), 1.34-1.26 (m, 6H), 1.12 (d, J = 6.9 Hz, 3H). <sup>13</sup>C NMR (125 MHz, Acetone-d<sub>6</sub>) δ 171.3, 169.0, 167.7, 161.5, 136.7, 129.3, 129.0, 129.0, 128.5, 128.4, 127.9, 119.4, 84.5, 77.3, 37.4, 28.2, 20.3, 19.7, 15.3. HRMS (ESI) m/z calcd for C<sub>23</sub>H<sub>23</sub>ClN<sub>4</sub>O<sub>3</sub> [M+H]<sup>+</sup> 439.1531, found 439.1534.

**(R)-4-(5-(ethylamino)-3-phenylisoxazol-4-yl)-2-(4-fluorophenyl)-4-hydroxy-5-isopropyl-2,4-dihydro-3H-pyrazol-3-one (3ga)**

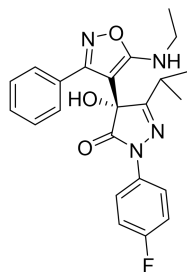

The title compound was prepared according to the general working procedure and purified by column chromatography (PE/EA = 10/1-5/1) to give the product as a white solid. 38.8 mg, 92% yield; mp = 163-164 °C;  $[\alpha]_D^{20}$  239.7 (c = 1.0, CHCl<sub>3</sub>, 95% ee); HPLC: Daicel Chiralpak IC, hexane: 2-propanol = 80:20, flow rate = 0.8 mL/min, T = 14°C, UV = 254 nm,  $t_R$  = 11.2 min (major),  $t_R$  = 14.1 min (minor); <sup>1</sup>H NMR (500 MHz, Acetone-d<sub>6</sub>) δ 7.59-7.51 (m, 2H), 7.20-7.06 (m, 7H), 6.60 (t, J = 6.3 Hz, 1H), 6.26 (s, 1H), 3.56-3.44 (m, 2H), 2.86-2.78 (m, 1H), 1.31 (m, 6H), 1.12 (d, J = 6.9 Hz, 3H). <sup>13</sup>C NMR (125 MHz, Acetone-d<sub>6</sub>) δ 171.1, 169.0, 167.5, 161.5, 159.4 (d, J = 241.7 Hz), 134.3 (d, J = 2.8 Hz), 129.3, 128.9, 128.5, 127.9, 119.9 (d, J = 8.3 Hz), 114.9 (d, J = 22.7 Hz), 84.6, 77.2, 37.4, 28.2, 20.3, 19.7, 15.2. <sup>19</sup>F NMR (471 MHz, Acetone-d<sub>6</sub>) δ -119.35. HRMS (ESI) m/z calcd for C<sub>23</sub>H<sub>23</sub>FN<sub>4</sub>O<sub>3</sub> [M+H]<sup>+</sup> 423.1827, found 423.1830

**(R)-2-(4-bromophenyl)-4-(5-(ethylamino)-3-phenylisoxazol-4-yl)-4-hydroxy-5-isopropyl-2,4-dihydro-3H-pyrazol-3-one (3ha)**

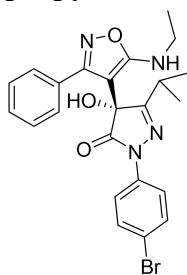

The title compound was prepared according to the general working procedure and purified by column chromatography (PE/EA = 10/1-5/1) to give the product as a white solid. 43.8 mg, 91% yield; mp = 176-178 °C;  $[\alpha]_D^{20}$  172.3 (c = 1.0, CHCl<sub>3</sub>, 90% ee); HPLC: Daicel Chiralpak IC, hexane: 2-propanol = 90:10, flow rate = 1.0 mL/min, T = 8°C, UV = 254 nm,  $t_R$  = 14.9 min (major),  $t_R$  = 18.3 min (minor); <sup>1</sup>H NMR (500 MHz, Acetone-d<sub>6</sub>) δ 7.55-7.46 (m, 4H), 7.19-7.06 (m, 5H), 6.60 (t, J = 6.3 Hz, 1H), 6.34 (s, 1H), 3.56-3.44 (m, 2H), 2.86-2.80 (m, 1H), 1.34-1.26 (m, 6H), 1.12 (d, J = 6.8 Hz, 3H). <sup>13</sup>C NMR (125 MHz, Acetone-d<sub>6</sub>) δ 171.4, 169.0, 167.8, 161.5, 137.2, 131.4, 129.3, 129.0, 128.5, 127.9,

119.8, 116.7, 84.5, 77.3, 37.4, 28.2, 20.3, 19.7, 15.2. HRMS (ESI)  $m/z$  calcd for  $C_{23}H_{23}BrN_4O_3$   $[M+H]^+$  483.1026, found 483.1031.

**(R)-4-(5-(ethylamino)-3-phenylisoxazol-4-yl)-4-hydroxy-5-isopropyl-2-(4-(trifluoromethyl)phenyl)-2,4-dihydro-3H-pyrazol-3-one (3ia)**

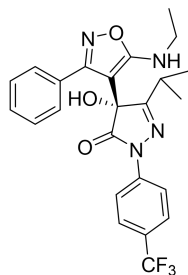

The title compound was prepared according to the general working procedure and purified by column chromatography (PE/EA = 10/1-5/1) to give the product as a white solid. 43.4 mg, 92% yield; mp = 152-154 °C;  $[\alpha]_D^{20}$  214.8 (c = 1.0,  $CHCl_3$ , 93% ee); HPLC: Daicel Chiralpak IC, hexane: 2-propanol = 90:10, flow rate = 1.0 mL/min, T = 14°C, UV = 254 nm,  $t_R$  = 11.8 min (major),  $t_R$  = 14.4 min (minor);  $^1H$  NMR (500 MHz, Acetone- $d_6$ )  $\delta$  7.78 (d, J = 8.6 Hz, 2H), 7.68 (d, J = 8.7 Hz, 2H), 7.14-7.04 (m, 5H), 6.62 (t, J = 6.1 Hz, 1H), 6.34 (s, 1H), 3.56-3.44 (m, 2H), 2.86 (hept, J = 6.9 Hz, 1H), 1.31 (m, 6H), 1.15 (d, J = 6.9 Hz, 3H).  $^{13}C$  NMR (125 MHz, Acetone- $d_6$ )  $\delta$  171.8, 169.0, 168.2, 161.5, 140.9, 129.2, 128.9, 128.5, 127.9, 125.7 (q, J = 3.8 Hz), 125.4 (q, J = 32.2 Hz), 124.5 (q, J = 271.2 Hz), 117.8, 84.5, 77.4, 37.4, 28.3, 20.3, 19.7, 15.2.  $^{19}F$  NMR (471 MHz, Acetone- $d_6$ )  $\delta$  -62.44. HRMS (ESI)  $m/z$  calcd for  $C_{24}H_{23}F_3N_4O_3$   $[M+H]^+$  473.1795, found 473.1801.

**(R)-4-(5-(ethylamino)-3-phenylisoxazol-4-yl)-4-hydroxy-5-isopropyl-2-(4-nitrophenyl)-2,4-dihydro-3H-pyrazol-3-one (3ja)**

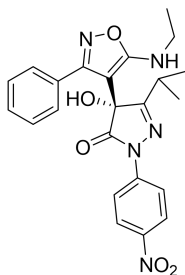

The title compound was prepared according to the general working procedure and purified by column chromatography (PE/EA = 10/1-5/1) to give the product as a white solid. 40.4 mg, 90% yield; mp = 175-176 °C;  $[\alpha]_D^{20}$  228.9 (c = 1.0,  $CHCl_3$ , 88% ee); HPLC: Daicel Chiralpak AD-H, hexane: 2-propanol = 70:30, flow rate = 1.0 mL/min, T = 23°C, UV = 254 nm,  $t_R$  = 4.4 min (major),  $t_R$  = 6.3 min (minor);  $^1H$  NMR (500 MHz, MeOD)  $\delta$  8.24-8.17 (m, 2H), 7.85-7.78 (m, 2H), 7.11-7.03 (m, 5H), 3.47 (q, J = 7.1 Hz, 2H), 2.85 (hept, J = 6.9 Hz, 1H), 1.34-1.29 (m, 6H), 1.19 (d, J = 6.9 Hz, 3H).  $^{13}C$  NMR (125 MHz, MeOD)  $\delta$  172.9, 169.3, 169.0, 161.8, 143.8, 142.6, 129.1, 128.3, 128.2, 127.8, 124.0, 117.5, 84.5, 77.3, 37.1, 28.3, 19.8, 19.4, 14.7. HRMS (ESI)  $m/z$  calcd for  $C_{23}H_{23}N_5O_5$   $[M+H]^+$  450.1772, found 450.1779.

**(R)-4-(5-(ethylamino)-3-phenylisoxazol-4-yl)-4-hydroxy-5-isopropyl-2-(m-tolyl)-2,4-dihydro-3H-pyrazol-3-one (3ka)**

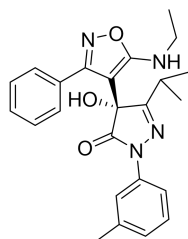

The title compound was prepared according to the general working procedure and purified by column chromatography (PE/EA = 10/1-5/1) to give the product as a white solid. 38.9 mg, 93% yield; mp = 155-156 °C;  $[\alpha]_D^{20}$  144.7 (c = 1.0,  $CHCl_3$ , 95% ee); HPLC: Daicel Chiralpak IC, hexane: 2-propanol = 90:10, flow rate = 1.0 mL/min, T = 14°C, UV = 254 nm,  $t_R$  = 11.4 min (major),  $t_R$  = 15.5

min (minor);  $^1\text{H}$  NMR (500 MHz, Acetone- $d_6$ )  $\delta$  7.37-7.30 (m, 2H), 7.23-7.07 (m, 6H), 6.96 (d,  $J = 7.5$  Hz, 1H), 6.58 (t,  $J = 6.3$  Hz, 1H), 6.21 (s, 1H), 3.55-3.43 (m, 2H), 2.80 (hept,  $J = 6.9$  Hz, 1H), 2.31 (s, 3H), 1.34-1.26 (m, 6H), 1.09 (d,  $J = 6.9$  Hz, 3H).  $^{13}\text{C}$  NMR (125 MHz, Acetone- $d_6$ )  $\delta$  171.3, 169.1, 167.1, 161.6, 138.0, 137.9, 129.4, 128.9, 128.5, 128.2, 127.9, 125.3, 118.9, 115.6, 84.7, 77.2, 37.4, 28.3, 20.7, 20.4, 19.7, 15.3. HRMS (ESI)  $m/z$  calcd for  $\text{C}_{24}\text{H}_{26}\text{N}_4\text{O}_3$   $[\text{M}+\text{H}]^+$  419.2078, found 419.2085.

**(R)-4-(5-(ethylamino)-3-phenylisoxazol-4-yl)-4-hydroxy-5-isopropyl-2-(3-methoxyphenyl)-2,4-dihydro-3H-pyrazol-3-one (3la)**

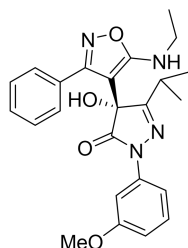

The title compound was prepared according to the general working procedure and purified by column chromatography (PE/EA = 10/1-5/1) to give the product as a white solid. 40.4 mg, 93% yield; mp = 162-165 °C;  $[\alpha]_{\text{D}}^{20}$  126.4 ( $c = 1.0$ ,  $\text{CHCl}_3$ , 96% ee); HPLC: Daicel Chiralpak IC, hexane: 2-propanol = 80:20, flow rate = 0.8 mL/min,  $T = 13^\circ\text{C}$ , UV = 254 nm,  $t_{\text{R}} = 13.2$  min (major),  $t_{\text{R}} = 17.0$  min (minor);  $^1\text{H}$  NMR (500 MHz, Acetone- $d_6$ )  $\delta$  7.27-7.21 (m, 1H), 7.21-7.15 (m, 3H), 7.15-7.08 (m, 4H), 6.75-6.70 (m, 1H), 6.59 (t,  $J = 6.3$  Hz, 1H), 6.24 (s, 1H), 3.77 (s, 3H), 3.56-3.44 (m, 2H), 2.85-2.76 (m, 1H), 1.34-1.26 (m, 6H), 1.09 (d,  $J = 6.9$  Hz, 3H).  $^{13}\text{C}$  NMR (125 MHz, Acetone- $d_6$ )  $\delta$  171.4, 169.1, 167.1, 161.5, 159.8, 139.1, 129.4, 129.2, 128.9, 128.5, 127.9, 110.4, 109.9, 104.1, 84.7, 77.3, 54.7, 37.4, 28.3, 20.4, 19.6, 15.2. HRMS (ESI)  $m/z$  calcd for  $\text{C}_{24}\text{H}_{26}\text{N}_4\text{O}_4$   $[\text{M}+\text{H}]^+$  435.2027, found 435.2033.

**(R)-4-(5-(ethylamino)-3-phenylisoxazol-4-yl)-2-(3-fluorophenyl)-4-hydroxy-5-isopropyl-2,4-dihydro-3H-pyrazol-3-one (3ma)**

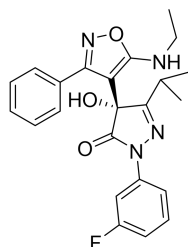

The title compound was prepared according to the general working procedure and purified by column chromatography (PE/EA = 10/1-5/1) to give the product as a white solid. 38.0 mg, 90% yield; mp = 164-165 °C;  $[\alpha]_{\text{D}}^{20}$  248.1 ( $c = 1.0$ ,  $\text{CHCl}_3$ , 92% ee); HPLC: Daicel Chiralpak IC, hexane: 2-propanol = 80:20, flow rate = 0.8 mL/min,  $T = 16^\circ\text{C}$ , UV = 254 nm,  $t_{\text{R}} = 8.6$  min (major),  $t_{\text{R}} = 11.0$  min (minor);  $^1\text{H}$  NMR (500 MHz, Acetone- $d_6$ )  $\delta$  7.43 (ddd,  $J = 8.3, 2.1, 1.0$  Hz, 1H), 7.40-7.30 (m, 2H), 7.18-7.06 (m, 5H), 6.91 (tdd,  $J = 8.4, 2.6, 1.0$  Hz, 1H), 6.60 (t,  $J = 6.2$  Hz, 1H), 6.30 (s, 1H), 3.56-3.44 (m, 2H), 2.84 (hept,  $J = 6.9$  Hz, 1H), 1.34-1.27 (m, 6H), 1.13 (d,  $J = 6.9$  Hz, 3H).  $^{13}\text{C}$  NMR (125 MHz, Acetone- $d_6$ )  $\delta$  171.5, 169.0, 167.8, 162.5 (d,  $J = 242.0$  Hz), 161.5, 139.4 (d,  $J = 11.1$  Hz), 130.1 (d,  $J = 9.2$  Hz), 129.3, 128.9, 128.5, 127.9, 113.5 (d,  $J = 3.5$  Hz), 110.8 (d,  $J = 21.3$  Hz), 104.8 (d,  $J = 27.5$  Hz), 84.5, 77.4, 37.4, 28.2, 20.3, 19.7, 15.2.  $^{19}\text{F}$  NMR (471 MHz, Acetone- $d_6$ )  $\delta$  -113.43. HRMS (ESI)  $m/z$  calcd for  $\text{C}_{23}\text{H}_{23}\text{FN}_4\text{O}_3$   $[\text{M}+\text{H}]^+$  423.1827, found 423.1835.

**(R)-2-(3-chlorophenyl)-4-(5-(ethylamino)-3-phenylisoxazol-4-yl)-4-hydroxy-5-isopropyl-2,4-dihydro-3H-pyrazol-3-one (3na)**

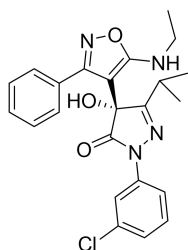

The title compound was prepared according to the general working procedure and purified by column chromatography (PE/EA = 10/1-5/1) to give the product as a white solid. 40.3 mg, 92% yield; mp = 154-156 °C;  $[\alpha]_D^{20}$  224.4 (c = 1.0, CHCl<sub>3</sub>, 94% ee); HPLC: Daicel Chiralpak IC, hexane: 2-propanol = 90:10, flow rate = 1.0 mL/min, T = 26°C, UV = 254 nm,  $t_R$  = 11.7 min (major),  $t_R$  = 16.0 min (minor); <sup>1</sup>H NMR (500 MHz, Acetone-d<sub>6</sub>) δ 7.58-7.50 (m, 2H), 7.34 (t, J = 8.1 Hz, 1H), 7.21-7.04 (m, 6H), 6.60 (t, J = 6.1 Hz, 1H), 6.32 (s, 1H), 3.55-3.43 (m, 2H), 2.84 (hept, J = 6.9 Hz, 1H), 1.33-1.27 (m, 6H), 1.14 (d, J = 6.9 Hz, 3H). <sup>13</sup>C NMR (126 MHz, Acetone-d<sub>6</sub>) δ 171.5, 169.0, 167.9, 161.5, 139.0, 133.6, 130.0, 129.3, 128.9, 128.6, 127.9, 124.2, 117.6, 116.2, 84.5, 77.4, 37.4, 28.2, 20.3, 19.8, 15.3. HRMS (ESI) m/z calcd for C<sub>23</sub>H<sub>23</sub>ClN<sub>4</sub>O<sub>3</sub> [M+H]<sup>+</sup> 439.1531, found 439.1538.

**(R)-2-(3-bromophenyl)-4-(5-(ethylamino)-3-phenylisoxazol-4-yl)-4-hydroxy-5-isopropyl-2,4-dihydro-3H-pyrazol-3-one (3oa)**

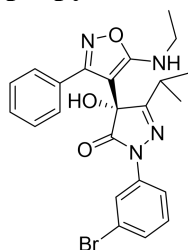

The title compound was prepared according to the general working procedure and purified by column chromatography (PE/EA = 10/1-5/1) to give the product as a white solid. 44.8 mg, 93% yield; mp = 167-170 °C;  $[\alpha]_D^{20}$  161.0 (c = 1.0, CHCl<sub>3</sub>, 93% ee); HPLC: Daicel Chiralpak IC, hexane: 2-propanol = 90:10, flow rate = 1.0 mL/min, T = 16°C, UV = 254 nm,  $t_R$  = 13.7 min (major),  $t_R$  = 20.3 min (minor); <sup>1</sup>H NMR (500 MHz, Acetone-d<sub>6</sub>) δ 7.68 (t, J = 1.9 Hz, 1H), 7.57 (dt, J = 7.9, 1.7 Hz, 1H), 7.35-7.25 (m, 2H), 7.19-7.08 (m, 5H), 6.60 (t, J = 6.3 Hz, 1H), 6.29 (s, 1H), 3.56-3.44 (m, 2H), 2.87-2.81 (m, 1H), 1.31 (m, 6H), 1.15 (d, J = 6.9 Hz, 3H). <sup>13</sup>C NMR (125 MHz, Acetone-d<sub>6</sub>) δ 171.5, 169.0, 168.0, 161.5, 139.1, 130.3, 129.3, 128.9, 128.6, 127.9, 127.2, 121.5, 120.6, 116.6, 84.5, 77.3, 37.4, 28.2, 20.3, 19.8, 15.2. HRMS (ESI) m/z calcd for C<sub>23</sub>H<sub>23</sub>BrN<sub>4</sub>O<sub>3</sub> [M+H]<sup>+</sup> 483.1026, found 483.1031.

**(R)-4-(5-(ethylamino)-3-phenylisoxazol-4-yl)-4-hydroxy-5-isopropyl-2-(3-(trifluoromethyl)phenyl)-2,4-dihydro-3H-pyrazol-3-one (3pa)**

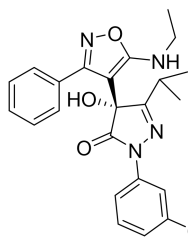

The title compound was prepared according to the general working procedure and purified by column chromatography (PE/EA = 10/1-5/1) to give the product as a white solid. 42.4 mg, 90% yield; mp = 161-164 °C;  $[\alpha]_D^{20}$  283.4 (c = 1.0, CHCl<sub>3</sub>, 88% ee); HPLC: Daicel Chiralpak IC, hexane: 2-propanol = 80:20, flow rate = 1.0 mL/min, T = 23°C, UV = 254 nm,  $t_R$  = 5.3 min (major),  $t_R$  = 6.8 min (minor); <sup>1</sup>H NMR (500 MHz, Acetone-d<sub>6</sub>) δ 7.86-7.79 (m, 2H), 7.57 (t, J = 8.0 Hz, 1H), 7.48 (d, J = 7.8 Hz, 1H), 7.15-7.03 (m, 5H), 6.62 (t, J = 6.2 Hz, 1H), 6.33 (s,



1H), 3.56-3.44 (m, 2H), 2.88 (hept, J = 6.9 Hz, 1H), 1.31 (dt, J = 7.1, 3.7 Hz, 6H), 1.17 (d, J = 6.9 Hz, 3H). <sup>13</sup>C NMR (125 MHz, Acetone-d<sub>6</sub>) δ 171.6, 168.9, 168.2, 161.5, 138.4, 130.1 (q, J = 32.2 Hz), 129.6, 129.2, 128.9, 128.6, 127.8, 124.2 (q, J = 271.2 Hz), 121.3, 120.8 (q, J = 4.1 Hz), 114.3 (q, J = 4.4 Hz), 84.5, 77.4, 37.4, 28.2, 20.3, 19.8, 15.2. <sup>19</sup>F NMR (471 MHz, Acetone-d<sub>6</sub>) δ -63.21. HRMS (ESI) m/z calcd for C<sub>24</sub>H<sub>23</sub>F<sub>3</sub>N<sub>4</sub>O<sub>3</sub> [M+Na]<sup>+</sup> 495.1614, found 495.1620.

**(R)-4-(5-(ethylamino)-3-phenylisoxazol-4-yl)-4-hydroxy-5-isopropyl-2-(3-nitrophenyl)-2,4-dihydro-3H-pyrazol-3-one (3qa)**

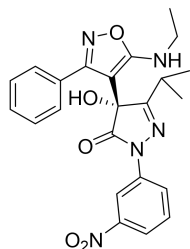

The title compound was prepared according to the general working procedure and purified by column chromatography (PE/EA = 10/1-5/1) to give the product as a white solid. 40.9 mg, 91% yield; mp = 157-159 °C; [α]<sub>D</sub><sup>20</sup> 257.2 (c = 1.0, CHCl<sub>3</sub>, 85% ee); HPLC: Daicel Chiralpak AD-H, hexane: 2-propanol = 80:20, flow rate = 1.0 mL/min, T = 18°C, UV = 254 nm, t<sub>R</sub> = 12.1 min (major), t<sub>R</sub> = 14.0 min (minor); <sup>1</sup>H NMR (500 MHz, MeOD) δ 8.35 (t, J = 2.2 Hz, 1H), 8.00 (ddd, J = 8.2, 2.3, 1.0 Hz, 1H), 7.94 (ddd, J = 8.3, 2.2, 1.0 Hz, 1H), 7.55 (t, J = 8.2 Hz, 1H), 7.17-6.92 (m, 5H), 3.47 (q, J = 7.1 Hz, 2H), 2.86 (hept, J = 6.9 Hz, 1H), 1.35-1.29 (m, 6H), 1.21 (d, J = 6.9 Hz, 3H). <sup>13</sup>C NMR (125 MHz, MeOD) δ 172.5, 169.2, 169.0, 161.8, 148.2, 138.4, 129.4, 129.0, 128.4, 128.3, 127.8, 123.4, 118.8, 112.4, 84.5, 77.4, 37.1, 28.2, 19.8, 19.5, 14.7. HRMS (ESI) m/z calcd for C<sub>23</sub>H<sub>23</sub>N<sub>5</sub>O<sub>5</sub> [M+H]<sup>+</sup> 450.1772, found 450.1780.

**(R)-4-(5-(ethylamino)-3-phenylisoxazol-4-yl)-2-(2-fluorophenyl)-4-hydroxy-5-isopropyl-2,4-dihydro-3H-pyrazol-3-one (3ra)**

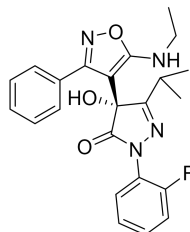

The title compound was prepared according to the general working procedure and purified by column chromatography (PE/EA = 10/1-5/1) to give the product as a white solid. 38.6 mg, 80% yield; mp = 157-158 °C; [α]<sub>D</sub><sup>20</sup> 115.3 (c = 1.0, CHCl<sub>3</sub>, 75% ee); HPLC: Daicel Chiralpak AD-H, hexane: 2-propanol = 70:30, flow rate = 0.8 mL/min, T = 23°C, UV = 254 nm, t<sub>R</sub> = 4.8 min (major), t<sub>R</sub> = 10.7 min (minor); <sup>1</sup>H NMR (500 MHz, Acetone-d<sub>6</sub>) δ 7.42-7.30 (m, 4H), 7.28-7.15 (m, 4H), 6.98 (td, J = 7.7, 1.8 Hz, 1H), 6.60 (t, J = 6.2 Hz, 1H), 6.43 (s, 1H), 3.55-3.43 (m, 2H), 2.74 (hept, J = 6.9 Hz, 1H), 1.33-1.24 (m, 6H), 1.00 (d, J = 6.9 Hz, 3H). <sup>13</sup>C NMR (125 MHz, Acetone-d<sub>6</sub>) δ 171.5, 169.3, 167.2, 161.5, 155.9 (d, J = 251.9 Hz), 129.8, 129.3, 128.8, 128.7, 128.3, 126.4, 124.8 (d, J = 12.0 Hz), 124.0 (d, J = 3.7 Hz), 116.3 (d, J = 19.4 Hz), 84.3, 75.8, 37.4, 28.4, 20.4, 19.3, 15.2. <sup>19</sup>F NMR (471 MHz, Acetone-d<sub>6</sub>) δ -119.04. HRMS (ESI) m/z calcd for C<sub>23</sub>H<sub>23</sub>FN<sub>4</sub>O<sub>3</sub> [M+H]<sup>+</sup> 423.1827, found 423.1832.

**(R)-2-(3,5-dimethylphenyl)-4-(5-(ethylamino)-3-phenylisoxazol-4-yl)-4-hydroxy-5-isopropyl-2,4-dihydro-3H-pyrazol-3-one (3sa)**

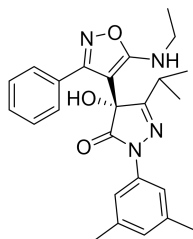

The title compound was prepared according to the general working procedure and purified by column chromatography (PE/EA = 10/1-5/1) to give the product as a white solid. 39.8 mg, 92% yield; mp = 162-164 °C;  $[\alpha]_D^{20}$  114.6 (c = 1.0, CHCl<sub>3</sub>, 94% ee); HPLC: Daicel Chiralpak IC, hexane: 2-propanol = 80:20, flow rate = 0.8 mL/min, T = 13°C, UV = 254 nm,  $t_R$  = 10.2 min (major),  $t_R$  = 13.8 min (minor); <sup>1</sup>H NMR (500 MHz, Acetone-d<sub>6</sub>) δ 7.25-7.16 (m, 1H), 7.16-7.09 (m, 6H), 6.81-6.77 (m, 1H), 6.57 (t, J = 6.2 Hz, 1H), 6.19 (s, 1H), 3.55-3.43 (m, 2H), 2.79 (hept, J = 6.9 Hz, 1H), 2.26 (s, 6H), 1.33-1.25 (m, 6H), 1.09 (d, J = 6.9 Hz, 3H). <sup>13</sup>C NMR (125 MHz, Acetone-d<sub>6</sub>) δ 171.2, 169.1, 167.0, 161.6, 137.8, 137.8, 129.5, 128.9, 128.6, 127.9, 126.2, 116.3, 84.8, 77.2, 37.4, 28.2, 20.6, 20.4, 19.8, 15.3. HRMS (ESI) m/z calcd for C<sub>25</sub>H<sub>28</sub>N<sub>4</sub>O<sub>3</sub> [M+H]<sup>+</sup> 433.2243, found 433.2241.

**(R)-2-(3,4-dichlorophenyl)-4-(5-(ethylamino)-3-phenylisoxazol-4-yl)-4-hydroxy-5-isopropyl-2,4-dihydro-3H-pyrazol-3-one (3ta)**

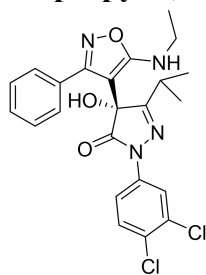

The title compound was prepared according to the general working procedure and purified by column chromatography (PE/EA = 10/1-5/1) to give the product as a white solid. 43.4 mg, 92% yield; mp = 173-176 °C;  $[\alpha]_D^{20}$  198.7 (c = 1.0, CHCl<sub>3</sub>, 87% ee); HPLC: Daicel Chiralpak IC, hexane: 2-propanol = 80:20, flow rate = 1.0 mL/min, T = 23°C, UV = 254 nm,  $t_R$  = 6.6 min (major),  $t_R$  = 7.7 min (minor); <sup>1</sup>H NMR (500 MHz, Acetone-d<sub>6</sub>) δ 7.69 (d, J = 2.3 Hz, 1H), 7.58-7.49 (m, 2H), 7.19-7.07 (m, 5H), 6.61 (t, J = 6.2 Hz, 1H), 6.32 (s, 1H), 3.56-3.44 (m, 2H), 2.89-2.82 (m, 1H), 1.34-1.28 (m, 6H), 1.16 (d, J = 6.8 Hz, 3H). <sup>13</sup>C NMR (125 MHz, Acetone-d<sub>6</sub>) δ 171.5, 168.9, 168.4, 161.4, 137.5, 131.6, 130.4, 129.2, 128.9, 128.6, 127.9, 126.8, 119.2, 117.6, 84.4, 77.4, 37.4, 28.2, 20.3, 19.8, 15.2. HRMS (ESI) m/z calcd for C<sub>23</sub>H<sub>22</sub>Cl<sub>2</sub>N<sub>4</sub>O<sub>3</sub> [M+H]<sup>+</sup> 473.1142, found 473.1148.

**(R)-4-(5-(ethylamino)-3-phenylisoxazol-4-yl)-4-hydroxy-5-isopropyl-2-(naphthalen-2-yl)-2,4-dihydro-3H-pyrazol-3-one (3ua)**

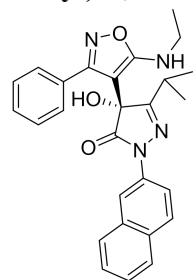

The title compound was prepared according to the general working procedure and purified by column chromatography (PE/EA = 10/1-5/1) to give the product as a white solid. 42.2 mg, 93% yield; mp = 168-170 °C;  $[\alpha]_D^{20}$  193.1 (c = 1.0, CHCl<sub>3</sub>, 95% ee); HPLC: Daicel Chiralpak IC, hexane: 2-propanol = 80:20, flow rate = 1.0 mL/min, T = 23°C, UV = 254 nm,  $t_R$  = 8.4 min (major),  $t_R$  = 12.2 min (minor); <sup>1</sup>H NMR (500 MHz, Acetone-d<sub>6</sub>) δ 8.00 (d, J = 2.1 Hz, 1H), 7.91-7.82 (m, 3H), 7.76 (dd, J = 9.0, 2.1 Hz, 1H), 7.55-7.43 (m, 2H), 7.20-7.12 (m, 2H), 7.11-7.02 (m, 3H), 6.63 (t, J = 6.2 Hz, 1H), 6.29 (s, 1H), 3.58-3.46 (m, 2H), 2.88-2.82 (m, 1H), 1.36-1.25 (m, 6H), 1.16 (d, J = 6.9 Hz, 3H). <sup>13</sup>C NMR (125 MHz, Acetone-d<sub>6</sub>) δ 171.5, 169.1, 167.5, 161.6, 135.6, 133.4, 130.9, 129.4, 128.9, 128.6, 128.2, 127.9, 127.7, 127.6, 126.5, 125.2, 118.1, 115.2, 84.7, 77.3, 37.4, 28.3, 20.4,

19.8, 15.3. HRMS (ESI)  $m/z$  calcd for  $C_{27}H_{26}N_4O_3$   $[M+H]^+$  455.2078, found 455.2084.

**(R)-4-(5-(ethylamino)-3-phenylisoxazol-4-yl)-4-hydroxy-5-isopropyl-2-methyl-2,4-dihydro-3H-pyrazol-3-one(3va)**

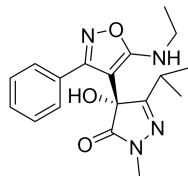

The title compound was prepared according to the general working procedure and purified by column chromatography (PE/EA = 10/1-5/1) to give the product as a white solid. 30.8 mg, 90% yield; mp = 103-104 °C;  $[\alpha]_D^{20}$  287.9 (c = 1.0,  $CHCl_3$ , 89% ee); HPLC: Daicel Chiralpak IC, hexane: 2-propanol = 80:20, flow rate = 1.0 mL/min, T = 23°C, UV = 254 nm,  $t_R$  = 7.5 min (major),  $t_R$  = 11.3 min (minor);  $^1H$  NMR (500 MHz,  $CDCl_3$ )  $\delta$  7.43-7.29 (m, 3H), 7.18-7.02 (m, 2H), 5.93 (s, 1H), 5.80 (s, 1H), 3.51-3.36 (m, 2H), 2.67 (hept, J = 6.8 Hz, 1H), 2.64 (s, 3H), 1.27 (t, J = 7.0 Hz, 3H), 1.19 (d, J = 6.9 Hz, 3H), 1.08 (d, J = 6.8 Hz, 3H).  $^{13}C$  NMR (125 MHz,  $CDCl_3$ )  $\delta$  170.4, 168.1, 167.4, 160.6, 128.4, 127.7, 127.5, 126.9, 83.3, 59.5, 36.7, 29.6, 27.1, 19.8, 19.3, 14.5. HRMS (ESI)  $m/z$  calcd for  $C_{18}H_{22}N_4O_3$   $[M+H]^+$  343.1765, found 343.1769.

**(R)-4-hydroxy-5-isopropyl-4-(5-(methylamino)-3-phenylisoxazol-4-yl)-2-phenyl-2,4-dihydro-3H-pyrazol-3-one (3ab)**

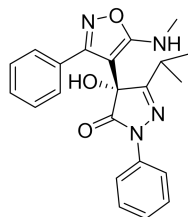

The title compound was prepared according to the general working procedure and purified by column chromatography (PE/EA = 10/1-5/1) to give the product as a white solid. 36.3 mg, 93% yield; mp = 177-179 °C;  $[\alpha]_D^{20}$  217.2 (c = 1.0,  $CHCl_3$ , 96% ee); HPLC: Daicel Chiralpak AD-H, hexane: 2-propanol = 80:20, flow rate = 1.0 mL/min, T = 23°C, UV = 254 nm,  $t_R$  = 9.3 min (major),  $t_R$  = 13.1 min (minor);  $^1H$  NMR (500 MHz,  $DMSO-d_6$ )  $\delta$  7.47 (d, J = 8.0 Hz, 2H), 7.35 (t, J = 7.8 Hz, 2H), 7.29 (s, 1H), 7.16 (q, J = 7.1 Hz, 2H), 7.09 (t, J = 7.5 Hz, 2H), 7.02 (m, 2H), 6.86 (q, J = 5.0 Hz, 1H), 2.96 (d, J = 5.0 Hz, 3H), 2.69 (hept, J = 7.1 Hz, 1H), 1.21 (d, J = 7.0 Hz, 3H), 1.01 (d, J = 6.8 Hz, 3H).  $^{13}C$  NMR (126 MHz,  $DMSO-d_6$ )  $\delta$  172.2, 169.4, 168.0, 161.8, 137.8, 129.5, 129.2, 129.0, 128.6, 128.4, 125.1, 118.5, 84.5, 77.1, 29.3, 28.2, 21.1, 20.6. HRMS (ESI)  $m/z$  calcd for  $C_{22}H_{22}N_4O_3$   $[M+H]^+$  391.1765, found 391.1771.

**(R)-4-(5-(allylamino)-3-phenylisoxazol-4-yl)-4-hydroxy-5-isopropyl-2-phenyl-2,4-dihydro-3H-pyrazol-3-one (3ac)**

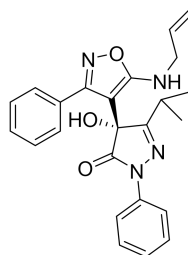

The title compound was prepared according to the general working procedure and purified by column chromatography (PE/EA = 10/1-5/1) to give the product as a white solid. 37.5 mg, 90% yield; mp = 151-152 °C;  $[\alpha]_D^{20}$  217.3 (c = 1.0,  $CHCl_3$ , 93% ee); HPLC: Daicel Chiralpak AD-H, hexane: 2-propanol = 80:20, flow rate = 1.0 mL/min, T = 23°C, UV = 254 nm,  $t_R$  = 8.6 min (major),  $t_R$  = 12.7

min (minor);  $^1\text{H}$  NMR (500 MHz, Acetone- $d_6$ )  $\delta$  7.60-7.53 (m, 2H), 7.36-7.28 (m, 2H), 7.21-7.06 (m, 6H), 6.76 (t,  $J = 6.5$  Hz, 1H), 6.30 (s, 1H), 6.05 (ddt,  $J = 17.2, 10.4, 5.2$  Hz, 1H), 5.38 (dq,  $J = 17.2, 1.7$  Hz, 1H), 5.18 (dq,  $J = 10.3, 1.6$  Hz, 1H), 4.09 (ddt,  $J = 5.0, 5.0, 1.7$  Hz, 2H), 2.80 (hept,  $J = 6.9$  Hz, 1H), 1.29 (d,  $J = 6.9$  Hz, 3H), 1.09 (d,  $J = 6.8$  Hz, 3H).  $^{13}\text{C}$  NMR (126 MHz, Acetone- $d_6$ )  $\delta$  171.3, 168.9, 167.1, 161.6, 138.0, 135.6, 129.3, 129.0, 128.5, 128.4, 127.9, 124.5, 118.2, 115.2, 85.0, 77.3, 44.7, 28.3, 20.4, 19.6. HRMS (ESI)  $m/z$  calcd for  $\text{C}_{24}\text{H}_{24}\text{N}_4\text{O}_3$   $[\text{M}+\text{H}]^+$  417.1921, found 417.1925.

**(R)-4-(5-(benzylamino)-3-phenylisoxazol-4-yl)-4-hydroxy-5-isopropyl-2-phenyl-2,4-dihydro-3H-pyrazol-3-one (3ad)**

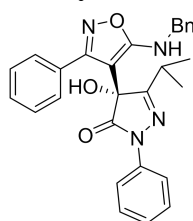

The title compound was prepared according to the general working procedure and purified by column chromatography (PE/EA = 10/1-5/1) to give the product as a white solid. 43.3 mg, 93% yield; mp = 171-172 °C;  $[\alpha]_{\text{D}}^{20}$  192.3 ( $c = 1.0$ ,  $\text{CHCl}_3$ , 96% ee); HPLC: Daicel Chiralpak AD-H, hexane: 2-propanol = 80:20, flow rate = 1.0 mL/min,  $T = 23^\circ\text{C}$ , UV = 254 nm,  $t_{\text{R}} = 12.2$  min (major),  $t_{\text{R}} = 17.8$  min (minor);  $^1\text{H}$  NMR (500 MHz, Acetone- $d_6$ )  $\delta$  7.59-7.53 (m, 2H), 7.53-7.48 (m, 2H), 7.42-7.26 (m, 5H), 7.21-7.05 (m, 7H), 6.40 (s, 1H), 4.73-4.61 (m, 2H), 2.78 (hept,  $J = 6.9$  Hz, 1H), 1.28 (d,  $J = 7.0$  Hz, 3H), 1.06 (d,  $J = 6.8$  Hz, 3H).  $^{13}\text{C}$  NMR (125 MHz, Acetone- $d_6$ )  $\delta$  171.3, 168.9, 167.2, 161.6, 139.7, 138.0, 129.2, 129.0, 128.5, 128.5, 128.4, 127.9, 127.4, 127.2, 124.6, 118.2, 85.2, 77.3, 46.1, 28.2, 20.4, 19.7. HRMS (ESI)  $m/z$  calcd for  $\text{C}_{28}\text{H}_{26}\text{N}_4\text{O}_3$   $[\text{M}+\text{H}]^+$  467.2078, found 467.2085.

**(R)-4-(5-(ethylamino)-3-(p-tolyl)isoxazol-4-yl)-4-hydroxy-5-isopropyl-2-phenyl-2,4-dihydro-3H-pyrazol-3-one (3ae)**

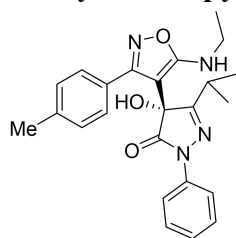

The title compound was prepared according to the general working procedure and purified by column chromatography (PE/EA = 10/1-5/1) to give the product as a white solid. 38.9 mg, 93% yield; mp = 164-167 °C;  $[\alpha]_{\text{D}}^{20}$  226.8 ( $c = 1.0$ ,  $\text{CHCl}_3$ , 93% ee); HPLC: Daicel Chiralpak IC, hexane: 2-propanol = 80:20, flow rate = 1.0 mL/min,  $T = 20^\circ\text{C}$ , UV = 254 nm,  $t_{\text{R}} = 11.3$  min (major),  $t_{\text{R}} = 15.1$  min (minor);  $^1\text{H}$  NMR (500 MHz, Acetone- $d_6$ )  $\delta$  7.55-7.49 (m, 2H), 7.36-7.29 (m, 2H), 7.17-7.10 (m, 1H), 7.00-6.95 (m, 2H), 6.86 (d,  $J = 7.9$  Hz, 2H), 6.54 (t,  $J = 6.2$  Hz, 1H), 6.21 (s, 1H), 3.54-3.42 (m, 2H), 2.88-2.76 (m, 1H), 2.07 (s, 3H), 1.32-1.27 (m, 6H), 1.13 (d,  $J = 6.9$  Hz, 3H).  $^{13}\text{C}$  NMR (125 MHz, Acetone- $d_6$ )  $\delta$  171.3, 168.9, 167.2, 161.6, 138.8, 138.0, 128.5, 128.4, 128.3, 126.3, 124.4, 118.1, 84.9, 77.3, 37.4, 28.2, 20.4, 20.3, 19.9, 15.3. HRMS (ESI)  $m/z$  calcd for  $\text{C}_{24}\text{H}_{26}\text{N}_4\text{O}_3$   $[\text{M}+\text{Na}]^+$  441.1897, found 441.1905.

**(R)-4-(5-(ethylamino)-3-(4-methoxyphenyl)isoxazol-4-yl)-4-hydroxy-5-isopropyl-2-phenyl-2,4-dihydro-3H-pyrazol-3-one (3af)**

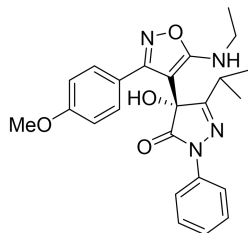

The title compound was prepared according to the general working procedure and purified by column chromatography (PE/EA = 10/1-5/1) to give the product as a white solid. 39.1mg, 90% yield; mp = 166-169 °C;  $[\alpha]_D^{20}$  262.4 (c = 1.0, CHCl<sub>3</sub>, 93% ee); HPLC: Daicel Chiralpak AD-H, hexane: 2-propanol = 70:30, flow rate = 1.0 mL/min, T = 20°C, UV = 254 nm,  $t_R$  = 4.1 min (major),  $t_R$  = 10.8 min (minor); <sup>1</sup>H NMR (500 MHz, Acetone-d<sub>6</sub>) δ 7.62-7.55 (m, 2H), 7.39-7.27 (m, 2H), 7.18-7.11 (m, 1H), 7.05-6.98 (m, 2H), 6.63-6.57 (m, 2H), 6.54 (t, J = 6.3 Hz, 1H), 6.19 (s, 1H), 3.53-3.44 (m, 2H), 2.86-2.79 (m, 1H), 1.32-1.29 (m, 6H), 1.15 (d, J = 6.8 Hz, 3H). <sup>13</sup>C NMR (125 MHz, Acetone-d<sub>6</sub>) δ 171.3, 168.9, 167.3, 161.4, 160.2, 138.1, 129.8, 128.3, 124.4, 121.3, 118.0, 113.3, 85.0, 77.3, 54.5, 37.4, 28.2, 20.4, 19.9, 15.3. HRMS (ESI) m/z calcd for C<sub>24</sub>H<sub>26</sub>N<sub>4</sub>O<sub>4</sub> [M+H]<sup>+</sup> 435.2027, found 435.2033.

**(R)-4-(5-(ethylamino)-3-(4-fluorophenyl)isoxazol-4-yl)-4-hydroxy-5-isopropyl-2-phenyl-2,4-dihydro-3H-pyrazol-3-one (3ag)**

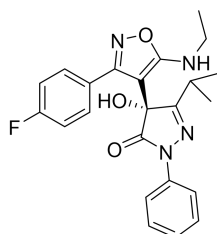

The title compound was prepared according to the general working procedure and purified by column chromatography (PE/EA = 10/1-5/1) to give the product as a white solid. 38.4 mg, 91% yield; mp = 163-166 °C;  $[\alpha]_D^{20}$  203.7 (c = 1.0, CHCl<sub>3</sub>, 97% ee); HPLC: Daicel Chiralpak AD-H, hexane: 2-propanol = 70:30, flow rate = 0.8 mL/min, T = 23°C, UV = 254 nm,  $t_R$  = 9.7 min (major),  $t_R$  = 18.5 min (minor); <sup>1</sup>H NMR (500 MHz, Acetone-d<sub>6</sub>) δ 7.61-7.55 (m, 2H), 7.38-7.29 (m, 2H), 7.18-7.11 (m, 3H), 6.88-6.80 (m, 2H), 6.60 (t, J = 6.2 Hz, 1H), 6.30 (s, 1H), 3.55-3.43 (m, 2H), 2.83 (hept, J = 6.9 Hz, 1H), 1.34-1.28 (m, 6H), 1.15 (d, J = 6.9 Hz, 3H). <sup>13</sup>C NMR (125 MHz, Acetone-d<sub>6</sub>) δ 171.3, 169.0, 167.5, 163.0 (d, J = 246.6 Hz), 160.7, 137.9, 130.8 (d, J = 9.0 Hz), 128.5, 125.5 (d, J = 3.6 Hz), 124.6, 117.9, 114.8 (d, J = 22.0 Hz), 84.9, 77.3, 37.4, 28.2, 20.4, 19.8, 15.2. <sup>19</sup>F NMR (471 MHz, Acetone-d<sub>6</sub>) δ -113.52. HRMS (ESI) m/z calcd for C<sub>23</sub>H<sub>23</sub>FN<sub>4</sub>O<sub>3</sub> [M+H]<sup>+</sup> 423.1827, found 423.1829.

**(R)-4-(3-(4-chlorophenyl)-5-(ethylamino)isoxazol-4-yl)-4-hydroxy-5-isopropyl-2-phenyl-2,4-dihydro-3H-pyrazol-3-one (3ah)**

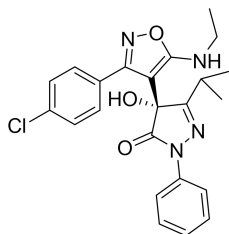

The title compound was prepared according to the general working procedure and purified by column chromatography (PE/EA = 10/1-5/1) to give the product as a white solid. 43.5 mg, 90% yield; mp = 166-168 °C;  $[\alpha]_D^{20}$  208.6 (c = 1.0, CHCl<sub>3</sub>, 98% ee); HPLC: Daicel Chiralpak IC, hexane: 2-propanol = 80:20, flow rate = 1.0 mL/min, T = 19°C, UV = 254 nm,  $t_R$  = 10.3 min (major),  $t_R$  = 16.5 min (minor); <sup>1</sup>H NMR (500 MHz, Acetone-d<sub>6</sub>) δ 7.58-7.52 (m, 2H), 7.39-7.31 (m, 2H), 7.19-7.12 (m, 1H), 7.10 (s, 4H), 6.62 (t, J = 6.2 Hz, 1H), 6.26 (s, 1H), 3.55-3.43 (m, 2H), 2.85 (hept, J = 6.9 Hz, 1H), 1.33-1.25 (m, 6H), 1.15 (d, J =

6.9 Hz, 3H). <sup>13</sup>C NMR (125 MHz, Acetone-d<sub>6</sub>) δ 171.2, 169.1, 167.5, 160.6, 137.8, 134.8, 130.2, 128.5, 128.1, 128.0, 124.6, 117.9, 84.8, 77.2, 37.4, 28.2, 20.4, 19.9, 15.2. HRMS (ESI) m/z calcd for C<sub>23</sub>H<sub>23</sub>ClN<sub>4</sub>O<sub>3</sub> [M+H]<sup>+</sup> 439.1531, found 439.1535.

**(R)-4-(3-(4-bromophenyl)-5-(ethylamino)isoxazol-4-yl)-4-hydroxy-5-isopropyl-2-phenyl-2,4-dihydro-3H-pyrazol-3-one (3ai)**

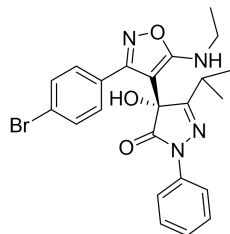

The title compound was prepared according to the general working procedure and purified by column chromatography (PE/EA = 10/1-5/1) to give the product as a white solid. 43.8 mg, 91% yield; mp = 156-158 °C; [α]<sub>D</sub><sup>20</sup> 237.8 (c = 1.0, CHCl<sub>3</sub>, 96% ee); HPLC: Daicel Chiralpak IC, hexane: 2-propanol = 90:10, flow rate = 1.0 mL/min, T = 24°C, UV = 254 nm, t<sub>R</sub> = 20.2 min (major), t<sub>R</sub> = 30.3 min (minor); <sup>1</sup>H NMR (500 MHz, Acetone-d<sub>6</sub>) δ 7.58-7.52 (m, 2H), 7.39-7.29 (m, 2H), 7.16-7.08 (m, 5H), 6.59 (t, J = 6.2 Hz, 1H), 6.24 (s, 1H), 3.55-3.43 (m, 2H), 2.80 (hept, J = 6.9 Hz, 1H), 1.34-1.26 (m, 6H), 1.10 (d, J = 6.9 Hz, 3H). <sup>13</sup>C NMR (126 MHz, Acetone-d<sub>6</sub>) δ 171.4, 169.1, 167.2, 161.5, 138.0, 129.4, 128.9, 128.5, 128.4, 127.9, 124.5, 118.1, 84.7, 77.3, 37.4, 28.3, 20.4, 19.7, 15.3. HRMS (ESI) m/z calcd for C<sub>23</sub>H<sub>23</sub>BrN<sub>4</sub>O<sub>3</sub> [M+H]<sup>+</sup> 483.1026, found 483.1033.

**(R)-4-(5-(ethylamino)-3-(3-methoxyphenyl)isoxazol-4-yl)-4-hydroxy-5-isopropyl-2-phenyl-2,4-dihydro-3H-pyrazol-3-one (3aj)**

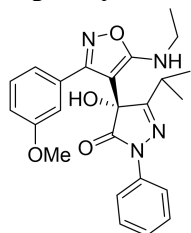

The title compound was prepared according to the general working procedure and purified by column chromatography (PE/EA = 10/1-5/1) to give the product as a white solid. 40.4 mg, 93% yield; mp = 163-165 °C; [α]<sub>D</sub><sup>20</sup> 220.3 (c = 1.0, CHCl<sub>3</sub>, 96% ee); HPLC: Daicel Chiralpak IC, hexane: 2-propanol = 80:20, flow rate = 1.0 mL/min, T = 20°C, UV = 254 nm, t<sub>R</sub> = 17.5 min (major), t<sub>R</sub> = 21.9 min (minor); <sup>1</sup>H NMR (500 MHz, Acetone-d<sub>6</sub>) δ 7.55 (dq, J = 7.1, 1.3 Hz, 2H), 7.37-7.28 (m, 2H), 7.17-7.10 (m, 1H), 7.02 (t, J = 7.9 Hz, 1H), 6.73-6.67 (m, 2H), 6.64 (dd, J = 2.6, 1.5 Hz, 1H), 6.59 (t, J = 6.2 Hz, 1H), 6.23 (s, 1H), 3.53 (s, 3H), 3.52-3.45 (m, 2H), 2.83 (hept, J = 6.9 Hz, 1H), 1.33-1.28 (m, 6H), 1.14 (d, J = 6.9 Hz, 3H). <sup>13</sup>C NMR (125 MHz, Acetone-d<sub>6</sub>) δ 171.2, 169.0, 167.2, 161.5, 159.2, 137.9, 130.5, 129.0, 128.3, 124.5, 120.8, 118.2, 114.8, 113.8, 84.6, 77.2, 54.4, 37.4, 28.3, 20.4, 19.8, 15.3. HRMS (ESI) m/z calcd for C<sub>24</sub>H<sub>26</sub>N<sub>4</sub>O<sub>4</sub> [M+Na]<sup>+</sup> 457.1846, found 457.1853.

**(R)-4-(3-(3-chlorophenyl)-5-(ethylamino)isoxazol-4-yl)-4-hydroxy-5-isopropyl-2-phenyl-2,4-dihydro-3H-pyrazol-3-one (3ak)**

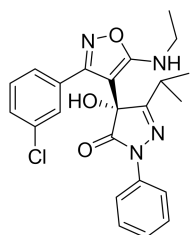

The title compound was prepared according to the general working procedure and purified by column chromatography (PE/EA = 10/1-5/1) to give the product as a white solid. 37.4 mg, 85% yield; mp = 158-160 °C; [α]<sub>D</sub><sup>20</sup> 196.5 (c = 1.0, CHCl<sub>3</sub>, 94% ee); HPLC:

Daicel Chiralpak IC, hexane: 2-propanol = 90:10, flow rate = 1.0 mL/min, T = 18°C, UV = 254 nm,  $t_R$  = 12.3 min (major),  $t_R$  = 16.8 min (minor);  $^1\text{H}$  NMR (500 MHz, Acetone- $d_6$ )  $\delta$  7.59 (d, J = 8.1 Hz, 2H), 7.32 (t, J = 7.9 Hz, 2H), 7.18-7.02 (m, 5H), 6.65 (t, J = 6.2 Hz, 1H), 6.28 (s, 1H), 3.56-3.44 (m, 2H), 2.84 (hept, J = 6.9 Hz, 1H), 1.31 (dt, J = 7.2, 3.7 Hz, 6H), 1.15 (d, J = 6.8 Hz, 3H).  $^{13}\text{C}$  NMR (125 MHz, Acetone- $d_6$ )  $\delta$  171.2, 169.1, 167.4, 160.3, 137.9, 133.5, 131.2, 129.6, 129.1, 128.5, 128.4, 127.1, 124.6, 118.0, 84.6, 77.2, 37.4, 28.3, 20.4, 19.8, 15.2. HRMS (ESI) m/z calcd for  $\text{C}_{23}\text{H}_{23}\text{ClN}_4\text{O}_3$   $[\text{M}+\text{Na}]^+$  461.1351, found 461.1357.

**(R)-4-(5-(ethylamino)-3-(3-(trifluoromethyl)phenyl)isoxazol-4-yl)-4-hydroxy-5-isopropyl-2-phenyl-2,4-dihydro-3H-pyrazol-3-one (3al)**

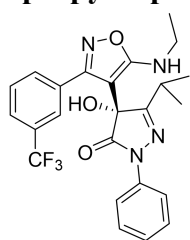

The title compound was prepared according to the general working procedure and purified by column chromatography (PE/EA = 10/1-5/1) to give the product as a white solid. 39.2 mg, 83% yield; mp = 150-152 °C;  $[\alpha]_D^{20}$  188.6 (c = 1.0,  $\text{CHCl}_3$ , 81% ee); HPLC: Daicel Chiralpak AD-H, hexane: 2-propanol = 90:10, flow rate = 1.0 mL/min, T = 23°C, UV = 254 nm,  $t_R$  = 5.9 min (major),  $t_R$  = 24.1 min (minor);  $^1\text{H}$  NMR (500 MHz, Acetone- $d_6$ )  $\delta$  7.55-7.50 (m, 2H), 7.46 (d, J = 8.1 Hz, 2H), 7.38 (d, J = 7.8 Hz, 1H), 7.34-7.24 (m, 3H), 7.15-7.10 (m, 1H), 6.67 (t, J = 6.3 Hz, 1H), 6.27 (s, 1H), 3.56-3.46 (m, 2H), 2.88 (hept, J = 6.9 Hz, 1H), 1.32 (dt, J = 7.2, 3.7 Hz, 6H), 1.17 (d, J = 6.9 Hz, 3H).  $^{13}\text{C}$  NMR (125 MHz, Acetone- $d_6$ )  $\delta$  171.1, 169.2, 167.5, 160.4, 137.7, 132.5, 130.3, 129.9 (q, J = 32.6 Hz), 129.0, 128.4, 125.8 (q, J = 3.7 Hz), 125.3 (q, J = 4.1 Hz), 124.5, 123.9 (q, J = 272.1 Hz), 117.7, 84.7, 77.2, 37.4, 28.2, 20.4, 19.7, 15.2.  $^{19}\text{F}$  NMR (471 MHz, Acetone- $d_6$ )  $\delta$  -63.24. HRMS (ESI) m/z calcd for  $\text{C}_{24}\text{H}_{23}\text{F}_3\text{N}_4\text{O}_3$   $[\text{M}+\text{Na}]^+$  495.1614, found 495.1621.

**(R)-4-(5-(ethylamino)-3-(thiophen-2-yl)isoxazol-4-yl)-4-hydroxy-5-isopropyl-2-phenyl-2,4-dihydro-3H-pyrazol-3-one (3am)**

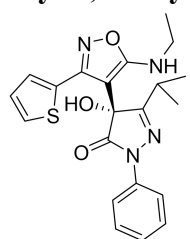

The title compound was prepared according to the general working procedure and purified by column chromatography (PE/EA = 10/1-5/1) to give the product as a white solid. 35.7 mg, 87% yield; mp = 152-154 °C;  $[\alpha]_D^{20}$  199.3 (c = 1.0,  $\text{CHCl}_3$ , 95% ee); HPLC: Daicel Chiralpak IC, hexane: 2-propanol = 80:20, flow rate = 1.0 mL/min, T = 16°C, UV = 254 nm,  $t_R$  = 14.3 min (major),  $t_R$  = 21.3 min (minor);  $^1\text{H}$  NMR (500 MHz, Acetone- $d_6$ )  $\delta$  7.67 (dd, J = 8.8, 1.3 Hz, 2H), 7.41-7.34 (m, 3H), 7.17 (tt, J = 7.3, 1.2 Hz, 1H), 6.82 (dd, J = 3.7, 1.2 Hz, 1H), 6.72 (dd, J = 5.1, 3.6 Hz, 1H), 6.68 (t, J = 6.5 Hz, 1H), 6.33 (s, 1H), 3.55-3.43 (m, 2H), 2.82 (hept, J = 6.9 Hz, 1H), 1.33-1.27 (m, 6H), 1.14 (d, J = 6.9 Hz, 3H).  $^{13}\text{C}$  NMR (125 MHz, Acetone- $d_6$ )  $\delta$  171.2, 169.5, 167.4, 155.6, 138.1, 128.6, 128.5, 128.1, 127.4, 127.0, 124.7, 118.3, 84.8, 77.1, 37.3, 28.4, 20.3, 19.8, 15.2. HRMS (ESI) m/z calcd for  $\text{C}_{21}\text{H}_{22}\text{N}_4\text{O}_3\text{S}$   $[\text{M}+\text{H}]^+$  411.1485, found 411.1490.

**(R)-4-(5-(ethylamino)-3-(furan-2-yl)isoxazol-4-yl)-4-hydroxy-5-isopropyl-2-phenyl-2,4-dihydro-3H-pyrazol-3-one (3an)**

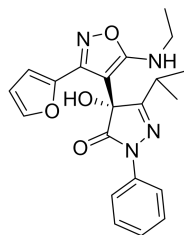

The title compound was prepared according to the general working procedure and purified by column chromatography (PE/EA = 10/1-5/1) to give the product as a white solid. 33.5 mg, 85% yield; mp = 159-162 °C;  $[\alpha]_D^{20}$  162.9 (c = 1.0, CHCl<sub>3</sub>, 91% ee); HPLC: Daicel Chiralpak IC, hexane: 2-propanol = 70:30, flow rate = 1.0 mL/min, T = 16°C, UV = 254 nm,  $t_R$  = 14.5 min (major),  $t_R$  = 32.5 min (minor); <sup>1</sup>H NMR (500 MHz, Acetone-d<sub>6</sub>) δ 7.89-7.83 (m, 2H), 7.46-7.38 (m, 2H), 7.19 (tt, J = 7.3, 1.2 Hz, 1H), 7.08-7.03 (m, 1H), 6.73 (t, J = 6.2 Hz, 1H), 6.63 (d, J = 3.4 Hz, 1H), 6.41 (s, 1H), 6.36 (dd, J = 3.4, 1.8 Hz, 1H), 3.54-3.42 (m, 2H), 2.77 (hept, J = 6.9 Hz, 1H), 1.32-1.26 (m, 6H), 1.09 (d, J = 6.9 Hz, 3H). <sup>13</sup>C NMR (125 MHz, Acetone-d<sub>6</sub>) δ 171.6, 169.6, 167.0, 152.6, 143.9, 143.5, 138.7, 128.7, 124.4, 118.0, 111.3, 109.8, 83.5, 77.0, 37.4, 28.4, 20.3, 19.7, 15.2. HRMS (ESI) m/z calcd for C<sub>21</sub>H<sub>22</sub>N<sub>4</sub>O<sub>4</sub> [M+H]<sup>+</sup> 395.1714, found 395.1718.

**(R)-4-(5-(ethylamino)-3-phenylisoxazol-4-yl)-5-isopropyl-4-methoxy-2-phenyl-2,4-dihydro-3H-pyrazol-3-one (4aa)**

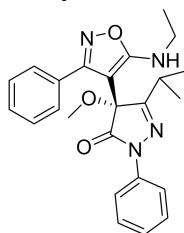

The title compound was prepared according to the general working procedure and purified by column chromatography (PE/EA = 10/1) to give the product as a white solid. 28.0 mg, 67% yield; mp = 174-176 °C; HPLC: Daicel Chiralpak AD-H, hexane: 2-propanol = 90:10, flow rate = 1.0 mL/min, T = 16°C, UV = 254 nm,  $t_R$  = 5.4 min (major),  $t_R$  = 8.3 min (minor); <sup>1</sup>H NMR (500 MHz, Acetone-d<sub>6</sub>) δ 7.61-7.55 (m, 2H), 7.39-7.31 (m, 2H), 7.21-7.17 (m, 1H), 7.17-7.13 (m, 1H), 7.13-7.06 (m, 4H), 6.67 (t, J = 6.2 Hz, 1H), 3.47 (dtd, J = 13.3, 7.0, 2.0 Hz, 2H), 3.24 (s, 3H), 2.78 (hept, J = 7.0 Hz, 1H), 1.32-1.27 (m, 6H), 1.12 (d, J = 6.8 Hz, 3H). <sup>13</sup>C NMR (125 MHz, Acetone-d<sub>6</sub>) δ 169.0, 168.7, 165.1, 161.5, 137.6, 129.3, 129.0, 128.6, 128.4, 127.9, 124.9, 118.3, 83.6, 83.1, 52.5, 37.4, 28.4, 19.7, 19.3, 15.3. HRMS (ESI) m/z calcd for C<sub>24</sub>H<sub>26</sub>N<sub>4</sub>O<sub>3</sub> [M+H]<sup>+</sup> 419.2078, found 419.2083.

**(R)-4-(5-(ethyl(methyl)amino)-3-phenylisoxazol-4-yl)-5-isopropyl-4-methoxy-2-phenyl-2,4-dihydro-3H-pyrazol-3-one (5aa)**

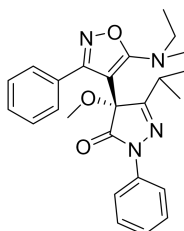

The title compound was prepared according to the general working procedure and purified by column chromatography (PE/EA = 20/1) to give the product as a white solid. 31.5 mg, 73% yield; mp = 159-160 °C; HPLC: Daicel Chiralpak IC, hexane: 2-propanol = 90:10, flow rate = 1.0 mL/min, T = 16°C, UV = 254 nm,  $t_R$  = 8.9 min (major),  $t_R$  = 12.3 min (minor); <sup>1</sup>H NMR (500 MHz, Acetone-d<sub>6</sub>) δ 7.81 (d, J = 8.1 Hz, 2H), 7.40 (t, J = 8.0 Hz, 2H), 7.38 – 7.27 (m, 3H), 7.25 – 7.17 (m, 3H), 3.61 – 3.37 (m, 2H), 3.17 (s, 3H), 3.07 (s, 3H), 2.48 (hept, J = 6.8 Hz, 1H), 1.23 (t, J = 7.2 Hz, 3H), 1.15 (d, J = 6.9 Hz, 3H), 0.86 (s, 3H). <sup>13</sup>C NMR (125 MHz,



Acetone-d<sub>6</sub>)  $\delta$  171.0, 169.9, 164.6, 163.4, 137.5, 129.7, 129.4, 128.9, 128.8, 128.0, 125.3, 118.6, 83.6, 77.3, 52.4, 49.4, 38.4, 29.0, 20.2, 19.0, 12.6. HRMS (ESI) m/z calcd for C<sub>25</sub>H<sub>28</sub>N<sub>4</sub>O<sub>3</sub> [M+H]<sup>+</sup> 433.2234, found 433.2240.

## 1.6 A plausible structure of the transition state and DFT calculations.

All the calculations were performed using Gaussian 16 software packages.<sup>[S5]</sup> The geometry of all reactants and transition states were optimized using the (U)B3LYP<sup>[S6]</sup>-D3(Becke-Johnson damping function)<sup>[S7]</sup> in toluene (using SMD solvation model<sup>[S8]</sup>). In these geometry optimizations, a mixed basis set of SDD<sup>[S9]</sup> for Cu, while 6-31G(d)<sup>[S10]</sup> for all the other atoms was used. Vibrational frequency analysis was calculated at the same level of theory to validate each structure as either a minimum or a transition state and to evaluate its zero-point energy and thermal corrections at 298 K. For each transition state, the intrinsic reaction coordinate (IRC) analysis was conducted to ensure that it connects the right reactant and product.<sup>[S11]</sup> To obtain more accurate energies, solution-phase single point energy calculations were performed at the (U)B3LYP-D3(BJ)/6-311+G(d,p)-SDD level.

**Table S3.** Thermal correction of Gibbs free energy (TCG, hartree) and single point energies (SP, hartree) in toluene for all species involved in this study

| Compounds     | TCG      | SP           | Compounds      | TCG      | SP           |
|---------------|----------|--------------|----------------|----------|--------------|
| <b>Int-I</b>  | 0.362192 | -2342.895995 | <b>TS</b>      | 0.716866 | -3600.298262 |
| <b>1c</b>     | 0.126058 | -646.027257  | <b>Int-III</b> | 0.71518  | -3600.298463 |
| <b>2a</b>     | 0.172227 | -611.30592   | <b>(R)-3ca</b> | 0.325724 | -1257.364543 |
| <b>Int-II</b> | 0.711477 | -3600.307755 |                |          |              |



|    |             |             |             |
|----|-------------|-------------|-------------|
| C  | 4.51739500  | -0.99983800 | 2.53141400  |
| C  | 5.48040800  | -0.85702000 | -0.06932000 |
| C  | 5.87972900  | -0.79215300 | 2.31683900  |
| H  | 4.13426400  | -1.04880800 | 3.54825100  |
| C  | 6.35375400  | -0.72049300 | 1.00902100  |
| H  | 6.55921700  | -0.67986600 | 3.15515100  |
| H  | 7.40695700  | -0.54810100 | 0.81750100  |
| O  | 3.31082800  | -1.22606000 | -0.92242700 |
| C  | 5.98455600  | -0.74731500 | -1.47726300 |
| F  | 5.39992700  | 0.27221300  | -2.15529900 |
| F  | 5.76737800  | -1.86937300 | -2.20128200 |
| F  | 7.32069300  | -0.51567200 | -1.51804500 |
| C  | -1.02544000 | -0.35439000 | 0.01133000  |
| C  | -1.35929800 | 1.15307700  | -0.06993100 |
| C  | -0.64437900 | 1.98000200  | -0.94274300 |
| C  | -2.38763200 | 1.72496000  | 0.69387000  |
| C  | -0.90052900 | 3.34823100  | -1.01035000 |
| H  | 0.11243200  | 1.54161400  | -1.58220500 |
| C  | -2.65156300 | 3.08999800  | 0.63425300  |
| H  | -3.00750200 | 1.09913000  | 1.32629400  |
| C  | -1.89663400 | 3.90853800  | -0.21005000 |
| H  | -0.32765500 | 3.97614000  | -1.68435700 |
| H  | -3.44478900 | 3.51759200  | 1.23870800  |
| C  | -2.35304500 | -1.13197100 | -0.01030400 |
| C  | -3.04009700 | -1.18657300 | -1.23251700 |
| C  | -2.91779300 | -1.75999400 | 1.10323000  |
| C  | -4.25229500 | -1.85455100 | -1.34132100 |
| H  | -2.60671700 | -0.70201100 | -2.09994300 |
| C  | -4.13743500 | -2.43341300 | 1.00233700  |
| H  | -2.42426100 | -1.73724100 | 2.06786000  |
| C  | -4.80611600 | -2.48036400 | -0.21826100 |
| H  | -4.77390900 | -1.88675200 | -2.29237700 |
| H  | -4.56440100 | -2.91458900 | 1.87549900  |
| O  | -0.29508400 | -0.74891700 | -1.12121400 |
| Cu | 1.50747500  | -0.87383400 | -0.88339900 |
| C  | -2.21648900 | 5.37121300  | -0.30585400 |
| C  | -6.08948100 | -3.24500400 | -0.35436800 |
| F  | -2.59078100 | 5.88394800  | 0.88997200  |
| F  | -1.16269800 | 6.09702800  | -0.74213700 |
| F  | -3.23766100 | 5.61165100  | -1.16374600 |
| F  | -6.72247900 | -3.40055500 | 0.83066300  |
| F  | -6.95527900 | -2.63314700 | -1.19534900 |

|   |             |             |             |
|---|-------------|-------------|-------------|
| F | -5.88519800 | -4.48932000 | -0.85275600 |
|---|-------------|-------------|-------------|

**1c**

|   |             |             |             |
|---|-------------|-------------|-------------|
| C | 2.25170100  | -0.89868400 | 0.00116600  |
| C | 1.04083500  | 1.15728400  | -0.00140100 |
| C | 2.47464100  | 0.57249900  | -0.00088100 |
| O | 3.50500900  | 1.20259000  | -0.00189700 |
| O | 0.73428200  | 2.33416900  | -0.00301800 |
| N | 0.23841400  | 0.03812300  | 0.00049600  |
| N | 0.98753600  | -1.15663100 | 0.00179800  |
| C | -1.77717000 | -1.32629700 | -0.00335800 |
| C | -3.16642100 | -1.42605800 | -0.00350000 |
| C | -3.96383100 | -0.28101800 | -0.00009000 |
| C | -3.35471900 | 0.97390100  | 0.00354600  |
| C | -1.96650900 | 1.09717300  | 0.00389500  |
| C | -1.17646900 | -0.06081500 | 0.00034800  |
| H | -1.15855800 | -2.21416600 | -0.00586900 |
| H | -3.62470800 | -2.41092000 | -0.00635000 |
| H | -5.04636500 | -0.36583300 | -0.00028100 |
| H | -3.96119100 | 1.87507100  | 0.00624600  |
| H | -1.49974600 | 2.07203900  | 0.00665000  |
| C | 3.30929600  | -1.94298500 | 0.00260300  |
| H | 3.95290900  | -1.83618900 | -0.87870200 |
| H | 3.95184900  | -1.83484000 | 0.88452000  |
| H | 2.86170500  | -2.93967500 | 0.00308100  |

**2a**

|   |             |             |             |
|---|-------------|-------------|-------------|
| C | -1.79753800 | 0.20211700  | 0.03283800  |
| C | -0.60163400 | 0.88037000  | -0.00104100 |
| C | 0.37514900  | -0.15308100 | 0.02415400  |
| H | -0.45545200 | 1.94816800  | -0.03500000 |
| O | -1.57202200 | -1.12547600 | 0.06675600  |
| N | -0.17117500 | -1.35734000 | 0.06513500  |
| C | 1.84233000  | -0.01540000 | 0.00717000  |
| C | 2.66306900  | -1.15496600 | -0.00713000 |
| C | 2.44170100  | 1.25164100  | 0.00525600  |
| C | 4.04838600  | -1.02542800 | -0.02266800 |
| H | 2.20181200  | -2.13676500 | -0.00599600 |
| C | 3.82989300  | 1.37858100  | -0.01098500 |
| H | 1.82308300  | 2.14344100  | 0.01860300  |
| C | 4.63805400  | 0.24147700  | -0.02502000 |
| H | 4.67085400  | -1.91582700 | -0.03357500 |

|   |             |             |             |
|---|-------------|-------------|-------------|
| H | 4.27912300  | 2.36777600  | -0.01187100 |
| H | 5.71983900  | 0.34048900  | -0.03757100 |
| N | -3.09455500 | 0.61294100  | 0.08459900  |
| H | -3.23267200 | 1.57504700  | -0.20050800 |
| C | -4.19801800 | -0.29778900 | -0.22916900 |
| H | -4.16400700 | -0.61352600 | -1.28277700 |
| H | -4.07246200 | -1.19640800 | 0.38081100  |
| C | -5.52851000 | 0.37250500  | 0.08399000  |
| H | -6.35595000 | -0.30974900 | -0.13581400 |
| H | -5.58328200 | 0.65650700  | 1.14028200  |
| H | -5.67189900 | 1.27528300  | -0.52314300 |

**Int-II**

|   |             |            |             |
|---|-------------|------------|-------------|
| C | 0.43745400  | 2.87533800 | 1.88897100  |
| C | 2.18415200  | 2.40307800 | 0.34437900  |
| C | 2.87055900  | 3.07813800 | 1.54389300  |
| C | 1.76231100  | 3.19966500 | 2.61956200  |
| H | -0.35609700 | 3.59965300 | 2.06989700  |
| H | 0.06147600  | 1.89394800 | 2.16793500  |
| H | 2.56065100  | 2.76452300 | -0.61399000 |
| H | 3.73698100  | 2.51962700 | 1.89954000  |
| H | 3.22964200  | 4.06799200 | 1.24514000  |
| H | 1.92300400  | 2.49351200 | 3.43730200  |
| H | 1.74430600  | 4.20443300 | 3.05041100  |
| N | 0.76070600  | 2.86424200 | 0.43018500  |
| C | 0.58721900  | 4.23517500 | -0.16315400 |
| H | 1.23601300  | 4.95105800 | 0.35594300  |
| H | 0.92534900  | 4.16386800 | -1.20287700 |
| C | -0.84273600 | 4.69226000 | -0.08547700 |
| C | -1.84434900 | 3.89653400 | -0.70448300 |
| C | -1.20169000 | 5.85424400 | 0.59554200  |
| C | -3.19524500 | 4.30779500 | -0.57770800 |
| C | -2.53416800 | 6.26587200 | 0.68394400  |
| H | -0.42084900 | 6.44853900 | 1.06627900  |
| C | -3.52722400 | 5.48105100 | 0.10007700  |
| H | -2.79505000 | 7.17687000 | 1.21271500  |
| H | -4.56917900 | 5.77242000 | 0.17741600  |
| O | -1.55536000 | 2.81219600 | -1.38761400 |
| C | -4.25465600 | 3.43369400 | -1.17414500 |
| F | -4.24443000 | 2.17413400 | -0.65776100 |
| F | -4.13528500 | 3.29321400 | -2.51569800 |
| F | -5.50098500 | 3.92180400 | -0.94954000 |

|    |             |             |             |
|----|-------------|-------------|-------------|
| C  | 2.24565500  | 0.83267900  | 0.26813600  |
| C  | 2.14684700  | 0.14929600  | 1.65037100  |
| C  | 3.26228600  | 0.01614700  | 2.48211100  |
| C  | 0.92761300  | -0.38334900 | 2.08500700  |
| C  | 3.14987700  | -0.59648200 | 3.73236100  |
| H  | 4.23219800  | 0.37382200  | 2.15600000  |
| C  | 0.81501000  | -0.99640800 | 3.33299200  |
| H  | 0.05912300  | -0.29518100 | 1.44563800  |
| C  | 1.92522300  | -1.10494900 | 4.16871900  |
| H  | -0.14558000 | -1.38774700 | 3.65613700  |
| H  | 1.84518900  | -1.57848900 | 5.14090300  |
| C  | 3.55751500  | 0.36665700  | -0.39334600 |
| C  | 3.68391100  | -1.01040300 | -0.64550800 |
| C  | 4.60175300  | 1.20843200  | -0.78345300 |
| C  | 4.79436100  | -1.52433400 | -1.29974800 |
| H  | 2.89656600  | -1.68241600 | -0.32331900 |
| C  | 5.72719400  | 0.69978400  | -1.43827900 |
| H  | 4.56733100  | 2.27294900  | -0.58403800 |
| C  | 5.82193100  | -0.66334000 | -1.70400500 |
| H  | 4.87128700  | -2.59015800 | -1.48869700 |
| H  | 6.52792000  | 1.36834400  | -1.73479300 |
| O  | 1.19600700  | 0.40020800  | -0.55602300 |
| Cu | -0.24818500 | 1.59068100  | -0.79563600 |
| C  | 0.05386500  | -2.40252700 | -2.04116900 |
| C  | -0.66246100 | -2.48699500 | -0.84265600 |
| C  | -1.49745100 | -3.63032700 | -1.02496000 |
| H  | -0.43841900 | -1.94889600 | 0.06150400  |
| O  | -0.36337000 | -3.36892100 | -2.88367100 |
| N  | -1.36520900 | -4.16012100 | -2.22463800 |
| C  | -2.47237700 | -4.17011900 | -0.06725400 |
| C  | -3.53691900 | -4.97157300 | -0.50919200 |
| C  | -2.35756000 | -3.87176000 | 1.29780800  |
| C  | -4.45957900 | -5.47258500 | 0.40406800  |
| H  | -3.63399100 | -5.18436600 | -1.56835800 |
| C  | -3.28551300 | -4.37222400 | 2.20810500  |
| H  | -1.53882000 | -3.25157900 | 1.64890300  |
| C  | -4.33748800 | -5.17381600 | 1.76395100  |
| H  | -5.28351000 | -6.08755000 | 0.05372100  |
| H  | -3.19468300 | -4.12484900 | 3.26107500  |
| H  | -5.06722300 | -5.55384600 | 2.47270600  |
| N  | 0.95324400  | -1.51930700 | -2.43976800 |
| H  | 1.19236800  | -0.77765600 | -1.75137300 |

|   |             |             |             |
|---|-------------|-------------|-------------|
| C | 1.54962000  | -1.48123200 | -3.77226400 |
| H | 2.33898900  | -2.24140200 | -3.84244500 |
| H | 0.78343200  | -1.73777300 | -4.51092000 |
| C | -3.07352500 | -1.24079300 | -2.38957600 |
| C | -2.47659300 | -0.31563300 | -0.30117300 |
| C | -2.03649100 | -0.40464100 | -1.75171200 |
| O | -1.13640700 | 0.27700800  | -2.24967100 |
| O | -1.90538500 | 0.33218500  | 0.57743100  |
| N | -3.62589700 | -1.04729200 | -0.25407700 |
| N | -3.96845900 | -1.57792100 | -1.51707500 |
| C | -5.64920000 | -2.05322400 | 0.63554900  |
| C | -6.48395000 | -2.33131400 | 1.71505100  |
| C | -6.17121400 | -1.87286800 | 2.99543000  |
| C | -5.00872200 | -1.12517200 | 3.18826700  |
| C | -4.15927600 | -0.83655100 | 2.12195000  |
| C | -4.48454300 | -1.30660500 | 0.84231500  |
| H | -5.88138200 | -2.41750400 | -0.35574300 |
| H | -7.38437400 | -2.91546200 | 1.54853800  |
| H | -6.82688500 | -2.09329000 | 3.83258700  |
| H | -4.75441300 | -0.75709600 | 4.17823600  |
| H | -3.26031100 | -0.25592600 | 2.27452300  |
| C | 2.12114400  | -0.09502900 | -4.04460200 |
| H | 2.58229700  | -0.07265000 | -5.03717000 |
| H | 1.33213900  | 0.66344300  | -4.00987600 |
| H | 2.88621900  | 0.16669600  | -3.30700800 |
| C | -3.13428800 | -1.64415800 | -3.81779000 |
| H | -3.06624600 | -0.76223100 | -4.46520800 |
| H | -2.29658600 | -2.30538600 | -4.06342600 |
| H | -4.06997700 | -2.17104000 | -4.01867100 |
| C | 4.38316400  | -0.75687100 | 4.57290300  |
| C | 6.99029700  | -1.21346200 | -2.46718400 |
| F | 7.36952800  | -2.42715600 | -2.00544400 |
| F | 6.69695500  | -1.37763900 | -3.78149900 |
| F | 8.07053000  | -0.40365100 | -2.40760800 |
| F | 5.19407000  | 0.32502900  | 4.48845300  |
| F | 5.12459100  | -1.82241100 | 4.18395100  |
| F | 4.09318500  | -0.93889300 | 5.88031900  |

**Int-III**

|   |            |            |             |
|---|------------|------------|-------------|
| C | 0.34178700 | 3.22797400 | 1.13000800  |
| C | 2.09943200 | 2.42796800 | -0.25719200 |
| C | 2.75329900 | 3.46303900 | 0.67402700  |

|   |             |             |             |
|---|-------------|-------------|-------------|
| C | 1.64848200  | 3.83513200  | 1.69405900  |
| H | -0.49370000 | 3.92683000  | 1.10818400  |
| H | 0.03106900  | 2.35654900  | 1.70163600  |
| H | 2.43700400  | 2.52152400  | -1.29039800 |
| H | 3.65401600  | 3.08074200  | 1.15577500  |
| H | 3.05131600  | 4.33999200  | 0.09117800  |
| H | 1.86220900  | 3.41944900  | 2.68153000  |
| H | 1.56815300  | 4.92008300  | 1.80424000  |
| N | 0.64884500  | 2.79644000  | -0.26665300 |
| C | 0.39154200  | 3.91289500  | -1.24027200 |
| H | 1.04257700  | 4.76620300  | -1.01307900 |
| H | 0.67731400  | 3.52690100  | -2.22602100 |
| C | -1.04397700 | 4.35299000  | -1.22353100 |
| C | -2.06013600 | 3.38574900  | -1.46517600 |
| C | -1.38742400 | 5.67844800  | -0.96277500 |
| C | -3.41099900 | 3.82562800  | -1.41161300 |
| C | -2.71945700 | 6.09881400  | -0.93923600 |
| H | -0.59195800 | 6.39753400  | -0.77516500 |
| C | -3.72642900 | 5.16026700  | -1.15970200 |
| H | -2.96774700 | 7.13648500  | -0.74092700 |
| H | -4.76833000 | 5.46068100  | -1.12859800 |
| O | -1.79701200 | 2.13501800  | -1.74387400 |
| C | -4.48905600 | 2.80722000  | -1.61442700 |
| F | -4.44251200 | 1.80951100  | -0.69370900 |
| F | -4.43542100 | 2.21038000  | -2.82847200 |
| F | -5.72956600 | 3.35488200  | -1.51388300 |
| C | 2.27740700  | 0.91379600  | 0.11706300  |
| C | 2.20694700  | 0.65144900  | 1.63654200  |
| C | 3.31961300  | 0.83931700  | 2.46163600  |
| C | 1.01982500  | 0.18830800  | 2.21645100  |
| C | 3.23619600  | 0.60414100  | 3.83593000  |
| H | 4.26687100  | 1.15398800  | 2.03806900  |
| C | 0.93690100  | -0.04664200 | 3.58934300  |
| H | 0.14845600  | 0.03579300  | 1.59148900  |
| C | 2.04359600  | 0.16163400  | 4.41066000  |
| H | 0.00099300  | -0.39007600 | 4.02074100  |
| H | 1.98552000  | -0.01768900 | 5.47846500  |
| C | 3.61808600  | 0.36237800  | -0.40661400 |
| C | 3.86697400  | -1.00295700 | -0.18241700 |
| C | 4.54978100  | 1.08864800  | -1.15299600 |
| C | 4.96986700  | -1.63567100 | -0.73713900 |
| H | 3.17215700  | -1.57349100 | 0.42418900  |



|    |             |             |             |
|----|-------------|-------------|-------------|
| C  | 5.66271400  | 0.46022000  | -1.71876400 |
| H  | 4.42677800  | 2.15213600  | -1.31943100 |
| C  | 5.86330400  | -0.90396800 | -1.52849400 |
| H  | 5.14079200  | -2.69293200 | -0.56151400 |
| H  | 6.36486100  | 1.03529700  | -2.31236600 |
| O  | 1.27085200  | 0.19581900  | -0.54455700 |
| Cu | -0.30687900 | 1.16258800  | -1.05607400 |
| C  | 0.42491300  | -2.82079200 | -1.35528900 |
| C  | -0.61004600 | -2.38887100 | -0.40901800 |
| C  | -1.22172100 | -3.70688600 | -0.07914100 |
| H  | -0.23215700 | -1.78306300 | 0.41288700  |
| O  | 0.27060500  | -4.10768800 | -1.66739000 |
| N  | -0.77963700 | -4.67341000 | -0.82280000 |
| C  | -2.29356700 | -3.93399100 | 0.89481800  |
| C  | -3.21228100 | -4.98038300 | 0.70853500  |
| C  | -2.42230800 | -3.08707800 | 2.00623300  |
| C  | -4.24381500 | -5.16909300 | 1.62206000  |
| H  | -3.12038300 | -5.61978200 | -0.16293500 |
| C  | -3.45935000 | -3.28046100 | 2.91533300  |
| H  | -1.72459100 | -2.27058200 | 2.15553000  |
| C  | -4.37203700 | -4.31812800 | 2.72387600  |
| H  | -4.96023100 | -5.97003600 | 1.46634000  |
| H  | -3.56517000 | -2.60777900 | 3.76003700  |
| H  | -5.19143500 | -4.45419900 | 3.42304300  |
| N  | 1.34504400  | -2.08780100 | -1.88933600 |
| H  | 1.41225200  | -1.10831800 | -1.48951500 |
| C  | 2.29355400  | -2.54256700 | -2.91465600 |
| H  | 3.13153300  | -3.04053000 | -2.41529800 |
| H  | 1.79032700  | -3.27998300 | -3.54572000 |
| C  | -2.73927200 | -2.09474700 | -1.93798300 |
| C  | -2.47376300 | -0.70360600 | -0.05771700 |
| C  | -1.65426000 | -1.31216000 | -1.21847300 |
| O  | -0.96706300 | -0.45931900 | -1.95949800 |
| O  | -2.02274400 | 0.04717100  | 0.80441200  |
| N  | -3.73558000 | -1.19857800 | -0.19464500 |
| N  | -3.87558700 | -2.01534400 | -1.34455200 |
| C  | -5.93921100 | -1.92494000 | 0.51171700  |
| C  | -7.01181700 | -1.84246600 | 1.39619300  |
| C  | -7.00333100 | -0.91674700 | 2.44113800  |
| C  | -5.91007500 | -0.06140700 | 2.58712300  |
| C  | -4.82858300 | -0.12571600 | 1.71019100  |
| C  | -4.84380300 | -1.06825200 | 0.67315100  |

|   |             |             |             |
|---|-------------|-------------|-------------|
| H | -5.93456500 | -2.64792200 | -0.29301000 |
| H | -7.85757500 | -2.51186900 | 1.26609700  |
| H | -7.84200500 | -0.85752900 | 3.12874500  |
| H | -5.89540900 | 0.67290000  | 3.38774200  |
| H | -3.98538200 | 0.54071900  | 1.81980900  |
| C | 2.78583500  | -1.35482700 | -3.72984300 |
| H | 3.53757200  | -1.69215400 | -4.44995300 |
| H | 1.95968500  | -0.88626200 | -4.27462700 |
| H | 3.24914200  | -0.60284500 | -3.08547500 |
| C | -2.55580400 | -2.80974400 | -3.22779400 |
| H | -2.10954000 | -2.12652600 | -3.95950200 |
| H | -1.87832700 | -3.66451300 | -3.11732100 |
| H | -3.51661900 | -3.16936300 | -3.60410200 |
| C | 4.46971700  | 0.77248400  | 4.67420300  |
| C | 6.97163200  | -1.62051200 | -2.23856000 |
| F | 7.51024200  | -2.60355400 | -1.48222500 |
| F | 6.52021000  | -2.21431400 | -3.37484600 |
| F | 7.97467800  | -0.79364100 | -2.60323600 |
| F | 5.19622200  | 1.84974900  | 4.29123600  |
| F | 5.29529300  | -0.29878600 | 4.57735100  |
| F | 4.18330300  | 0.92756400  | 5.98553000  |

**(R)-3ca**

|   |             |             |             |
|---|-------------|-------------|-------------|
| C | 3.08759100  | 0.43792300  | 0.05061100  |
| C | 1.70967700  | 0.30292100  | -0.02440000 |
| C | 1.23152600  | 1.60941400  | 0.30034700  |
| H | 1.69014500  | -1.24973600 | -2.20660200 |
| O | 3.41102700  | 1.70014200  | 0.36405800  |
| N | 2.21102700  | 2.46138900  | 0.53451200  |
| C | -0.16503100 | 2.08606800  | 0.38628600  |
| C | -1.09874800 | 1.41785700  | 1.18944800  |
| C | -0.56491400 | 3.21374000  | -0.34270300 |
| C | -2.42119600 | 1.85499900  | 1.24074100  |
| H | -0.79011200 | 0.55904900  | 1.77644700  |
| C | -1.88644500 | 3.65171700  | -0.28440800 |
| H | 0.16222000  | 3.72921900  | -0.96162400 |
| C | -2.81800300 | 2.96960100  | 0.50077600  |
| H | -3.14099700 | 1.31935200  | 1.85191600  |
| H | -2.19101100 | 4.52121700  | -0.86000900 |
| H | -3.85110300 | 3.30361300  | 0.53424400  |
| N | 4.08407900  | -0.46477600 | -0.10910100 |
| H | 3.78050900  | -1.29230000 | -0.61270300 |

|   |             |             |             |
|---|-------------|-------------|-------------|
| C | 5.48231200  | -0.06302200 | -0.27020600 |
| H | 5.62842700  | 0.47784600  | -1.21688400 |
| H | 5.72911200  | 0.62973500  | 0.53909100  |
| C | 0.62662900  | -1.84105400 | 0.75334600  |
| C | -0.39239900 | -0.70613200 | -1.03582800 |
| C | 0.99934500  | -0.95845000 | -0.42116800 |
| O | 1.77365300  | -1.72312500 | -1.35632200 |
| O | -0.59117100 | -0.13868600 | -2.09659100 |
| N | -1.28722500 | -1.31602900 | -0.18956600 |
| N | -0.64475300 | -1.98338000 | 0.87631900  |
| C | -3.41872700 | -1.99007600 | 0.75970600  |
| C | -4.81060100 | -1.92969200 | 0.76520300  |
| C | -5.49514100 | -1.17649000 | -0.18939100 |
| C | -4.76923400 | -0.47932100 | -1.15594300 |
| C | -3.37719400 | -0.52510600 | -1.17894200 |
| C | -2.70002400 | -1.28598900 | -0.21526500 |
| H | -2.88488700 | -2.56715100 | 1.50335900  |
| H | -5.36001700 | -2.47782700 | 1.52552100  |
| H | -6.58024900 | -1.13296100 | -0.17957900 |
| H | -5.28700200 | 0.11492400  | -1.90358500 |
| H | -2.81745400 | 0.02503300  | -1.92177800 |
| C | 6.38045400  | -1.29107400 | -0.21260100 |
| H | 7.42906700  | -0.99756500 | -0.32428300 |
| H | 6.26556000  | -1.81379500 | 0.74291600  |
| H | 6.14233900  | -1.99427600 | -1.02025500 |
| C | 1.60159500  | -2.45085000 | 1.69579400  |
| H | 2.24234500  | -3.16644600 | 1.16587100  |
| H | 2.25650500  | -1.68418600 | 2.12474800  |
| H | 1.07780600  | -2.97273500 | 2.50046700  |

## REFERENCES:

- [S1] (a) F. Guo, G. Lai, S. Xiong, S. Wang, Z. Wang, *Chem. Eur. J.*, 2010, **16**, 6438;  
 (b) S. Zhang, K. Xu, F. Guo, Y. Hu, Z. Zha, Z. Wang, *Chem. Eur. J.*, 2014, **20**, 979.
- [S2] P. Chauhan, S. Mahajan, U. Kaya, A. Peuronen, K. Rissanen and D. Enders. *J. Org. Chem.*, 2017, **82**, 7050-7058.
- [S3] R. Wang, Y. Li, H. He, Y. Xiao, F. Chen. *Chem.Eur.J.*, 2021, **27**, 4302-4306.
- [S4] M. Li, Y. Chen, Y. Yan, M. Liu, M. Huang, W. Li, L. Cao and X. Zhang. *Org. Biomol. Chem.*, 2021, **19**, 3820-3824.
- [S5] M. J. Frisch, G. W. Trucks, H. B. Schlegel, G. E. Scuseria, M. A. Robb, J. R. Cheeseman, G. Scalmani, V. Barone, G. A. Petersson, H. Nakatsuji, X. Li, M. Caricato, A. V. Marenich, J. Bloino, B. G. Janesko, R. Gomperts, B. Mennucci,

- H. P. Hratchian, J. V. Ortiz, A. F. Izmaylov, J. L. Sonnenberg, D. Williams-Young, F. Ding, F. Lipparini, F. Egidi, J. Goings, B. Peng, A. Petrone, T. Henderson, D. Ranasinghe, V. G. Zakrzewski, J. Gao, N. Rega, G. Zheng, W. Liang, M. Hada, M. Ehara, K. Toyota, R. Fukuda, J. Hasegawa, M. Ishida, T. Nakajima, Y. Honda, O. Kitao, H. Nakai, T. Vreven, K. Throssell, J. A. Jr. Montgomery, J. E. Peralta, F. Ogliaro, M. J. Bearpark, J. J. Heyd, E. N. Brothers, K. N. Kudin, V. N. Staroverov, T. A. Keith, R. Kobayashi, J. Normand, K. Raghavachari, A. P. Rendell, J. C. Burant, S. S. Iyengar, J. Tomasi, M. Cossi, J. M. Millam, M. Klene, C. Adamo, R. Cammi, J. W. Ochterski, R. L. Martin, K. Morokuma, O. Farkas, J. B. Foresman, Fox, D. J. Gaussian 16, Revision C.01, Gaussian, Inc., Wallingford CT, 2016.
- [S6] (a) A. D. Becke, *J. Chem. Phys.* 1993, **98**, 5648. (b) C. T. Lee, W. T. Yang, W. T. Parr, *Phys. Rev. B.*, 1988, **37**, 785.
- [S7] (a) S. Grimme, J. Antony, S. Ehrlich, H. Krieg, *J. Chem. Phys.* 2010, **132**, 154104; (b) S. Grimme, S. Ehrlich, L. J. Goerigk, *Comput. Chem.*, 2011, **32**, 1456.
- [S8] A. V. Marenich, C. J. Cramer, D. G. Truhlar, *J. Phys. Chem. B.*, 2009, **113**, 6378.
- [S9] D. Andrae, U. Häußermann, M. Dolg, H. Stoll, H. Preuß, *Theor. Chim. Acta.*, 1990, **77**, 123.
- [S10] W. J. Hehre, L. Radom, P. V. R. Schleyer, J. A. Pople. *Ab Initio Molecular Orbital Theory*; Wiley: New York, 1986.
- [S11] (a) K. Fukui, *Acc. Chem. Res.*, 1981, **14**, 363. (b) K. J. Fukui, *Phys. Chem.*, 1970, **74**, 4161.
- [S12] W. Humphrey, A. Dalke, K. Schulten, *J. Molec. Graphics.*, 1996, **14**, 33. [S1] Guo, F.; Lai, G.; Xiong, S.; Wang, S.; Wang, Z. Monodentate N-Ligand-Directed Bifunctional Transition-Metal Catalysis: Highly Enantioselective Friedel–Crafts Alkylation of Indoles with Nitroalkenes *Chem. Eur. J.* **2010**, *16*, 6438.

## Part II NMR spectra

$^1\text{H}$  NMR and  $^{13}\text{C}$  NMR of **1d**

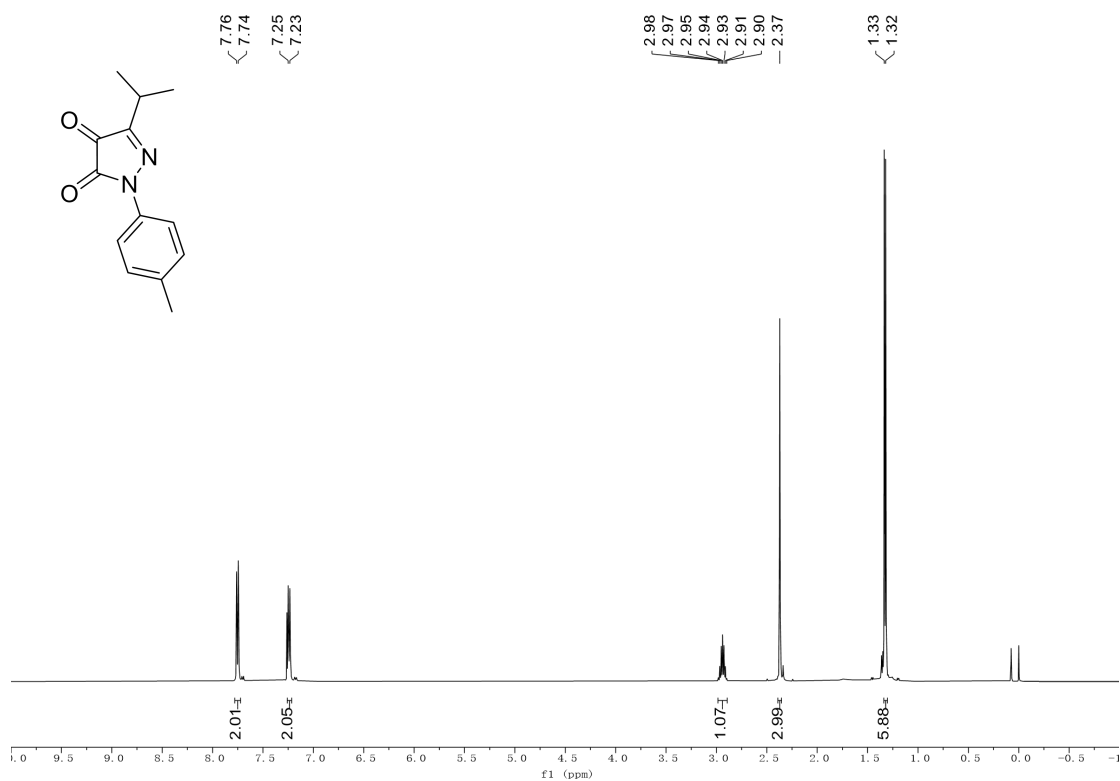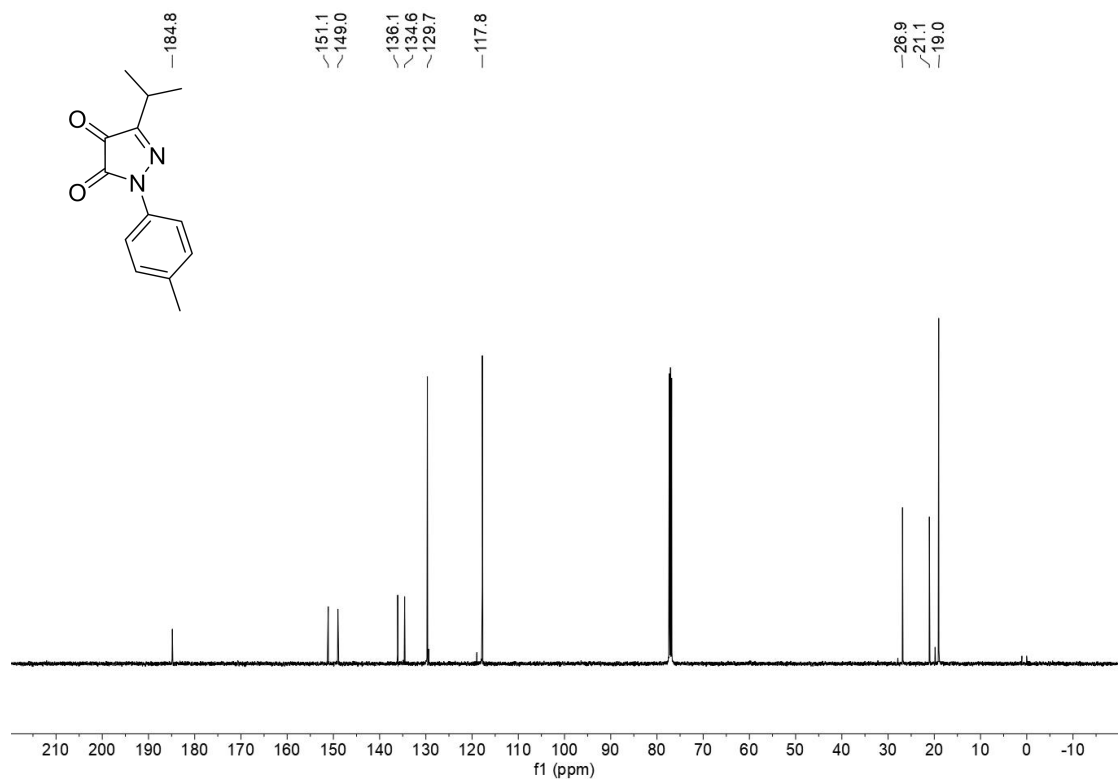

$^1\text{H}$  NMR and  $^{13}\text{C}$  NMR of **1e**

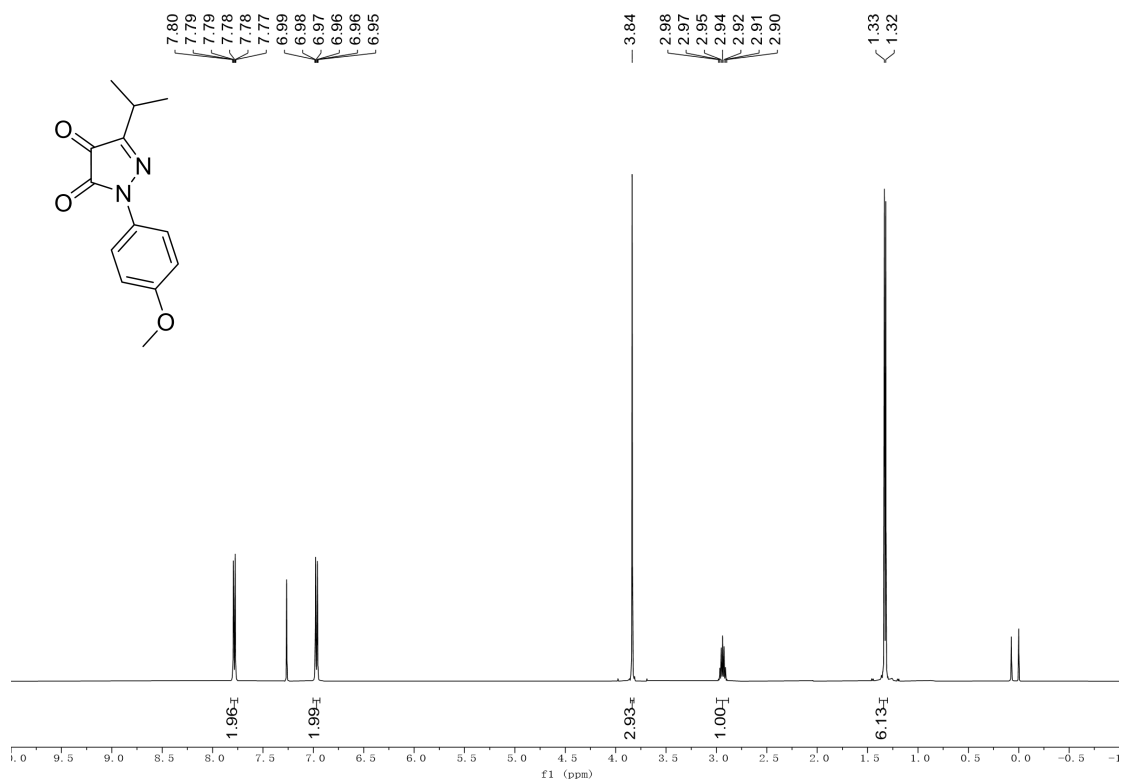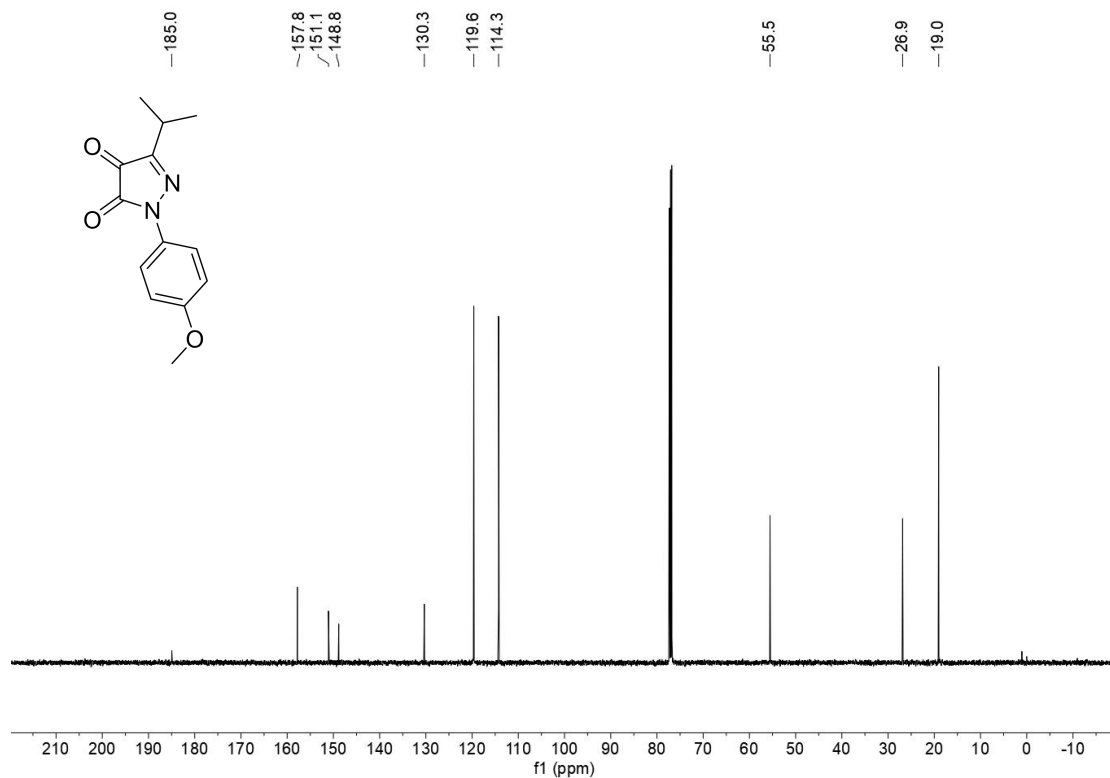

$^1\text{H}$  NMR and  $^{13}\text{C}$  NMR of **1f**

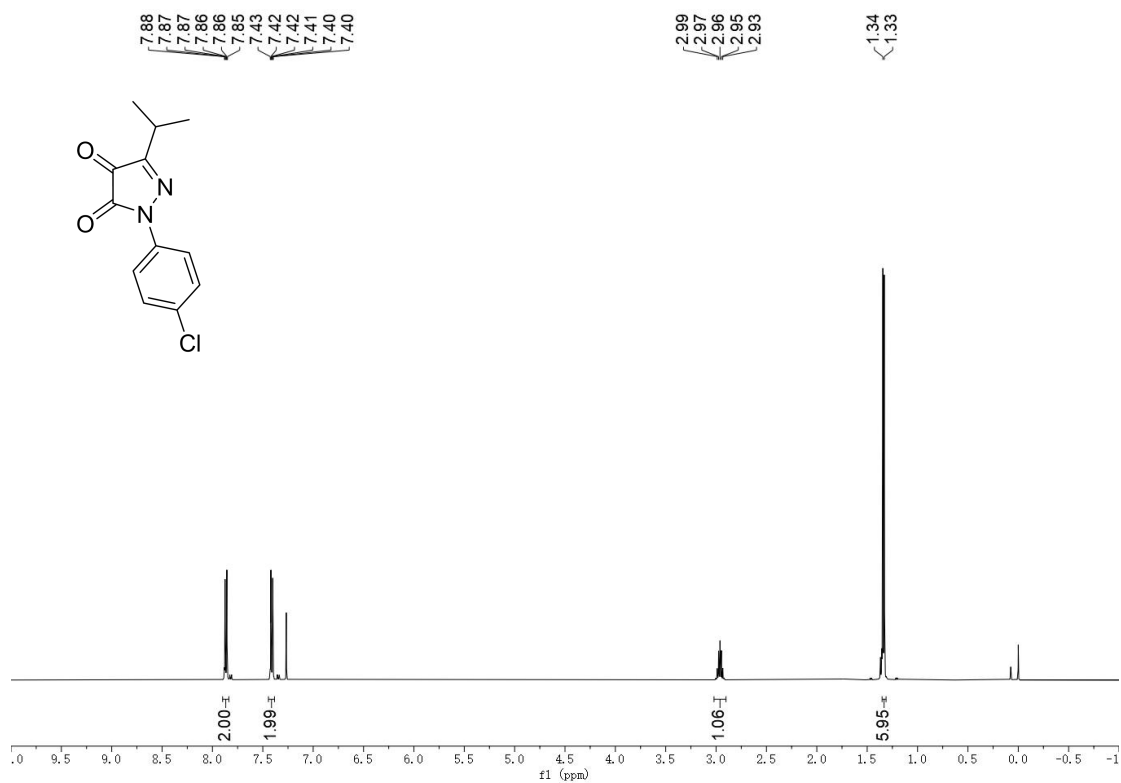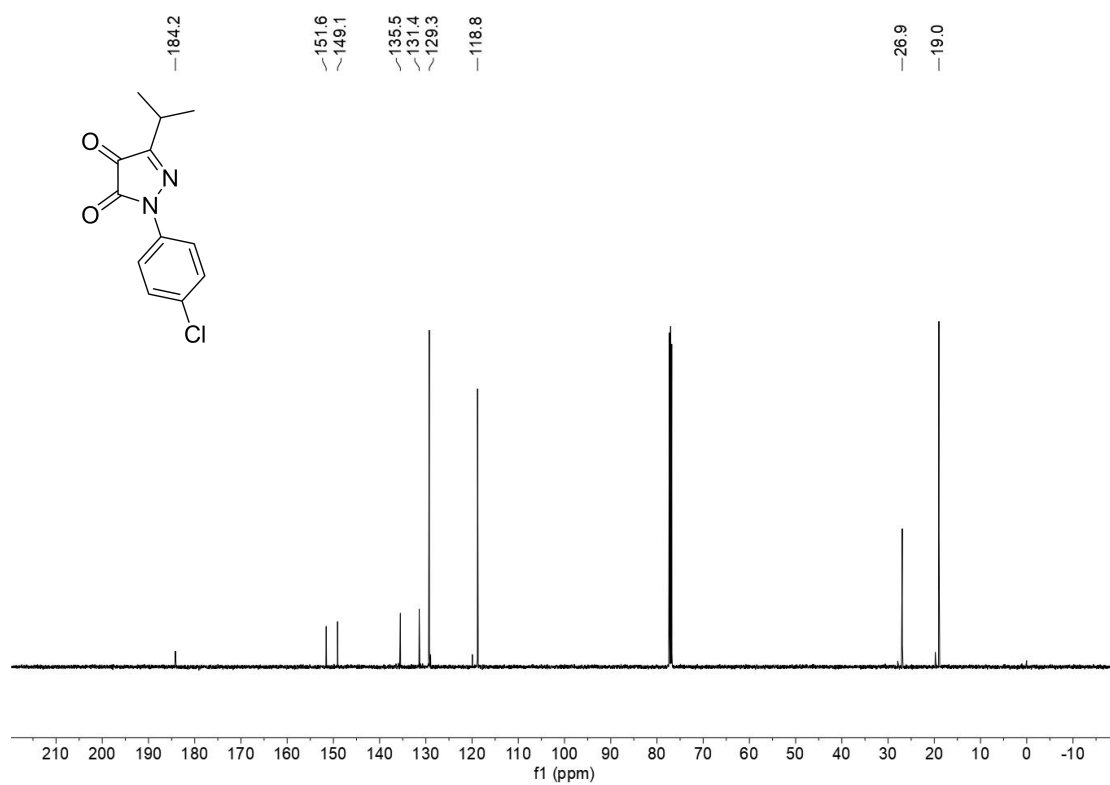

$^1\text{H}$  NMR,  $^{13}\text{C}$  NMR and  $^{19}\text{F}$  NMR of **1g**

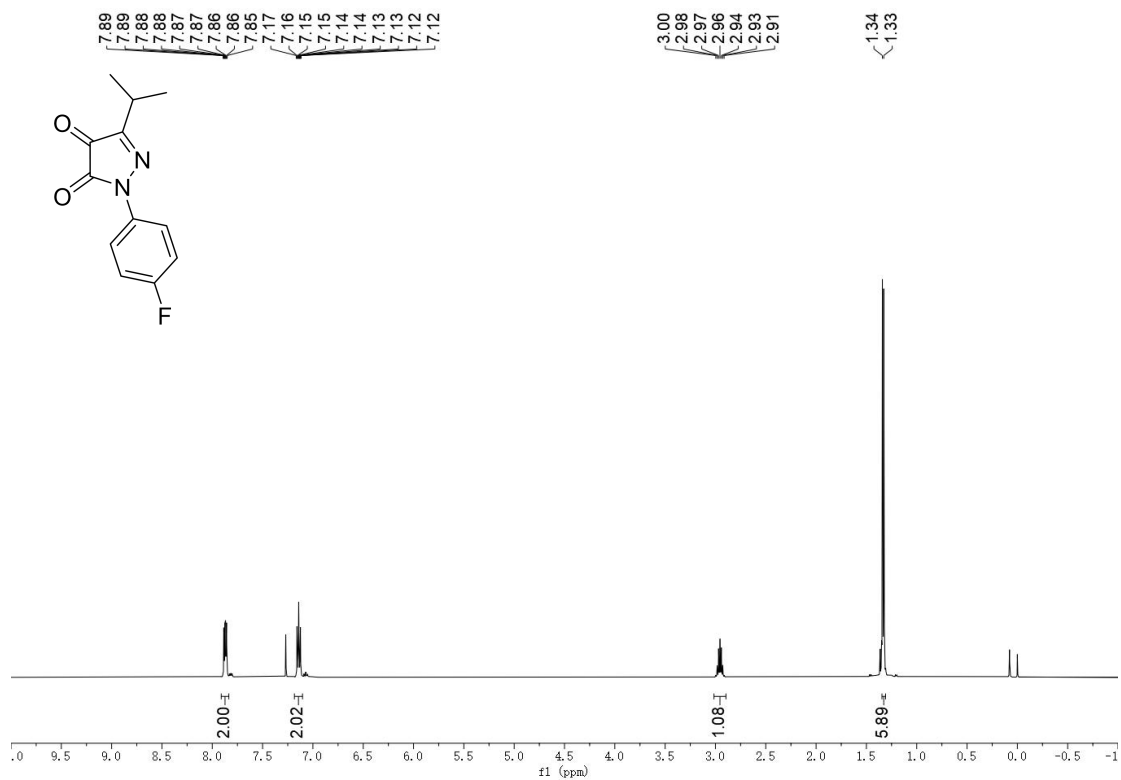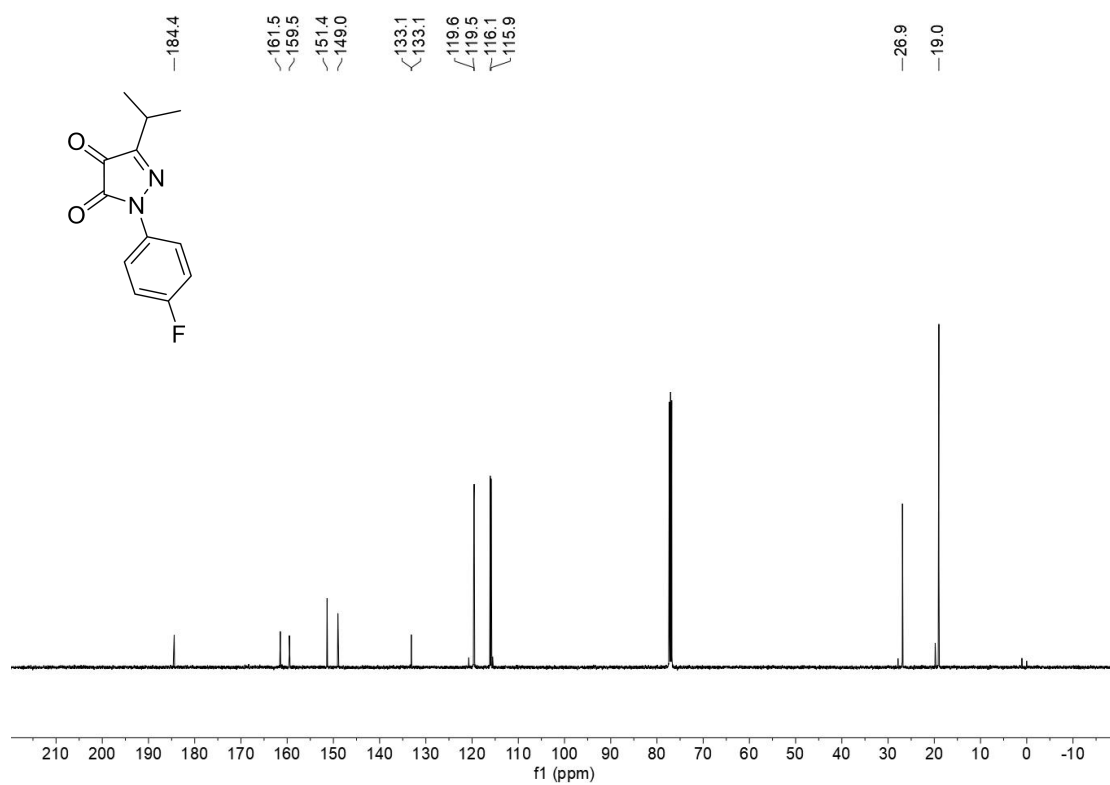



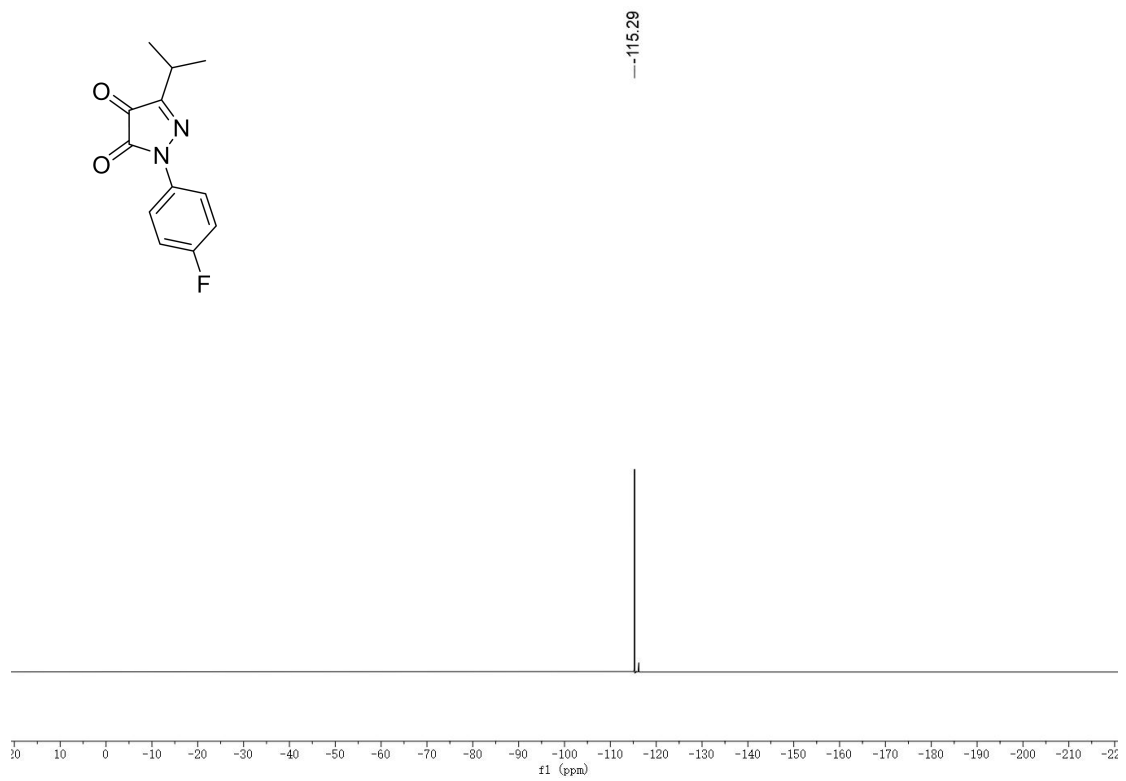

**<sup>1</sup>H NMR and <sup>13</sup>C NMR of 1h**

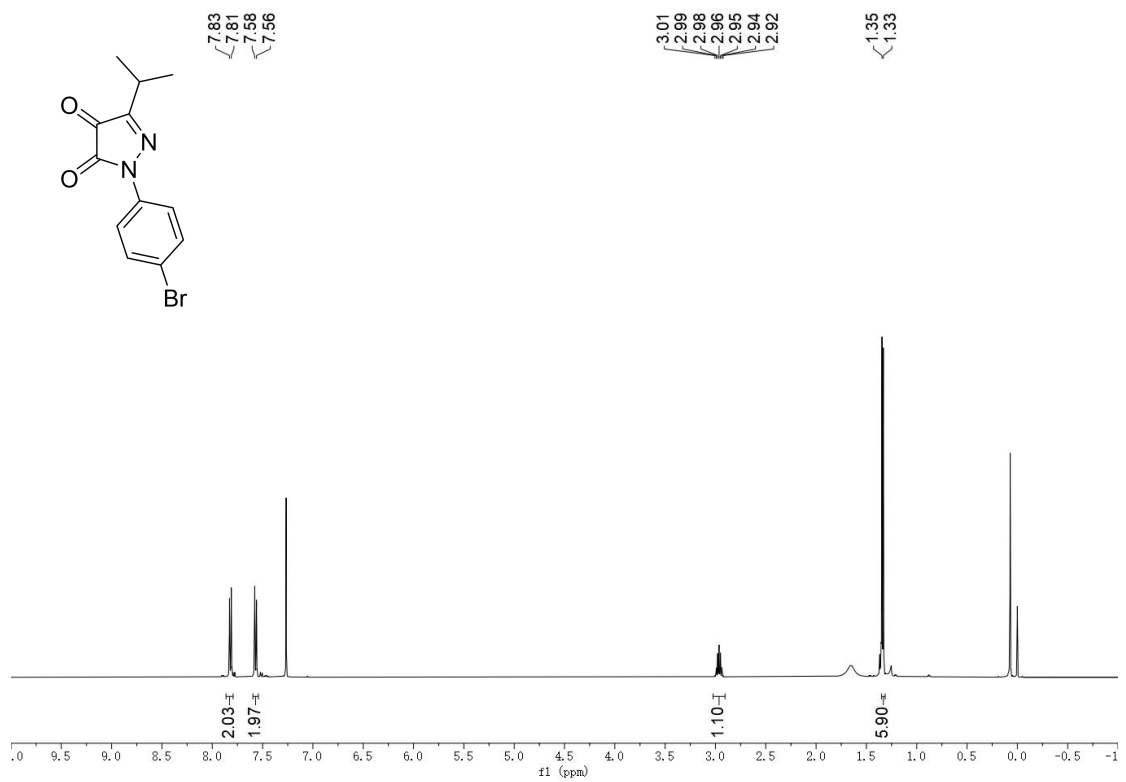

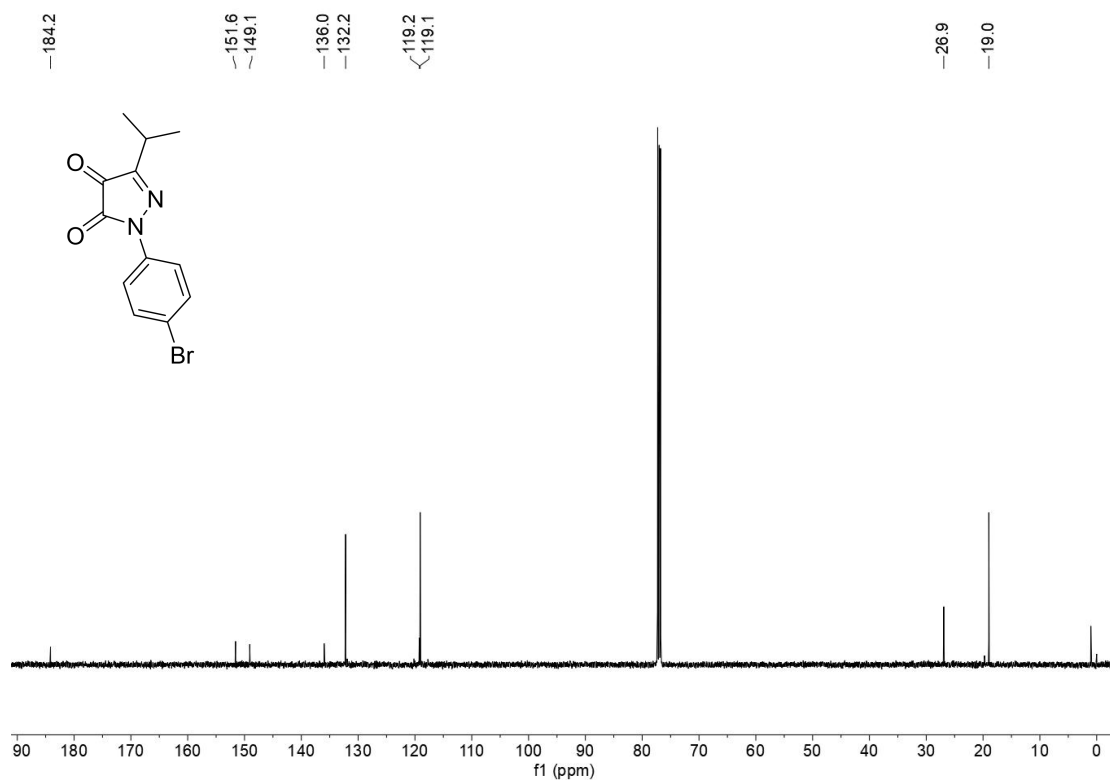

**<sup>1</sup>H NMR, <sup>13</sup>C NMR and <sup>19</sup>F NMR of **1i****

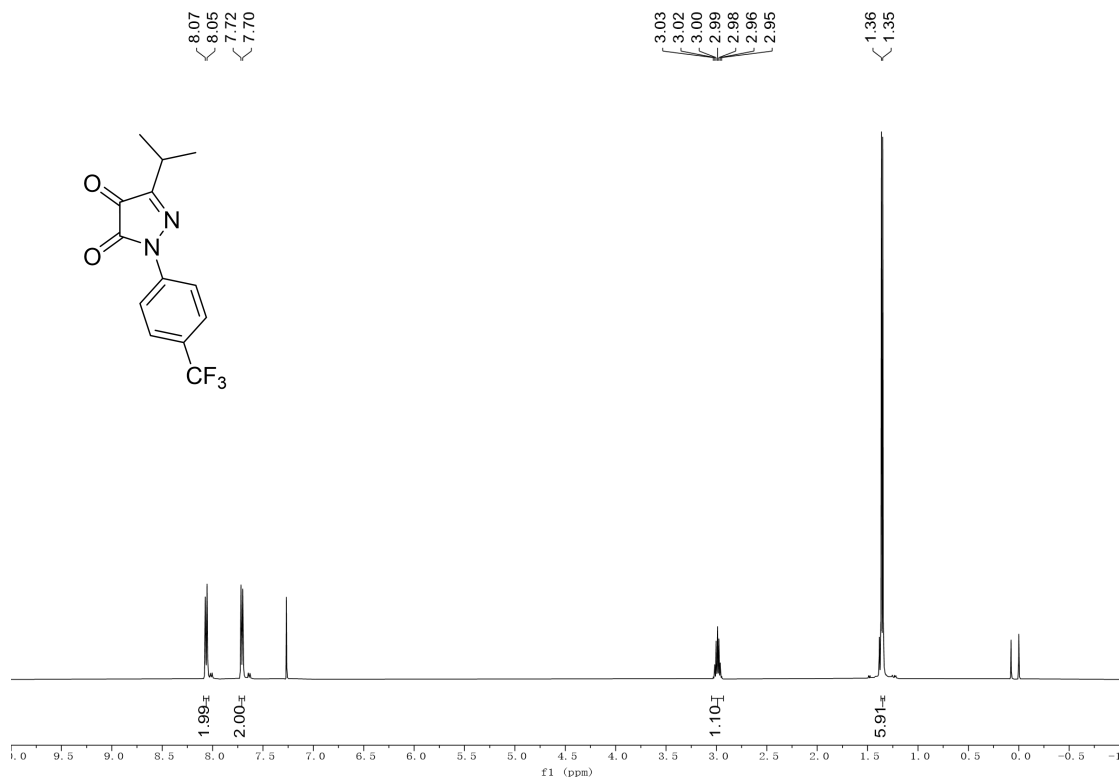

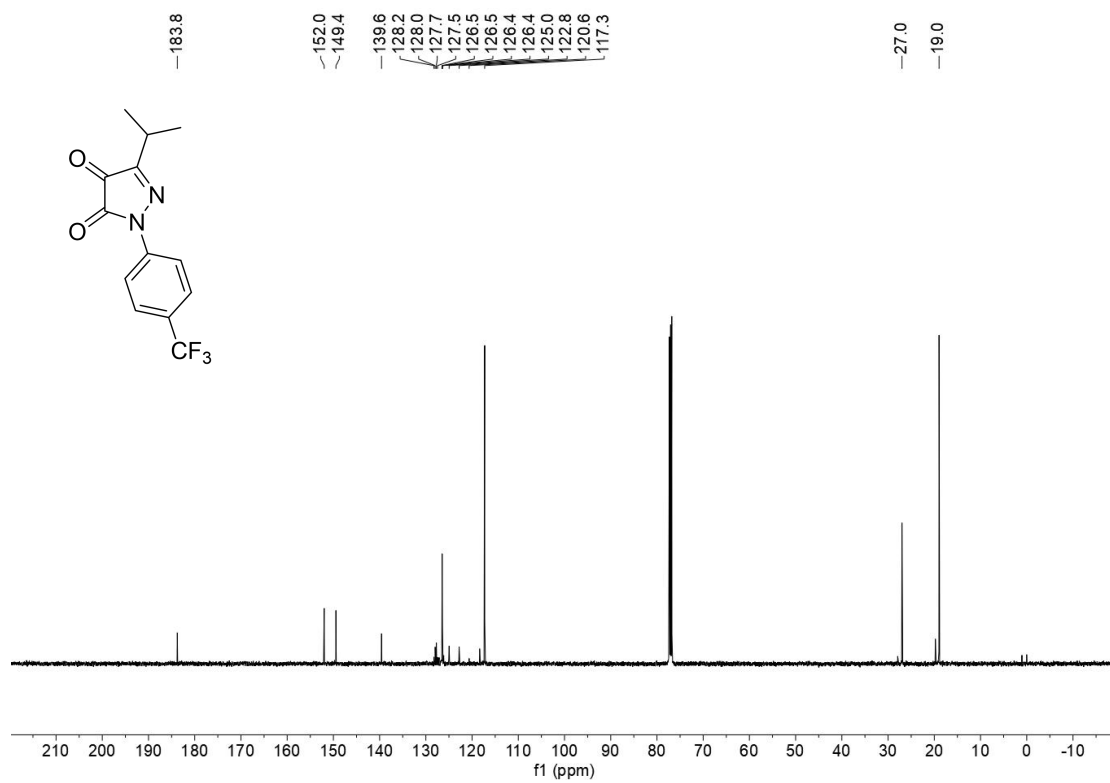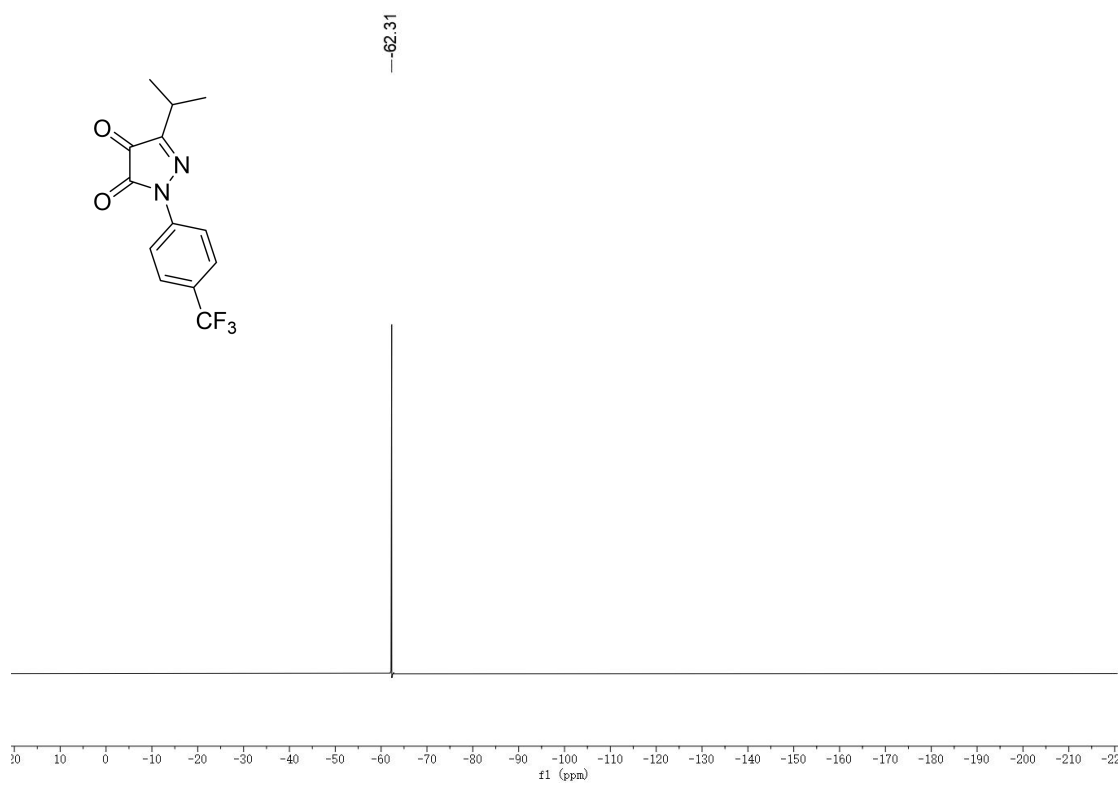

<sup>1</sup>H NMR and <sup>13</sup>C NMR of **1k**

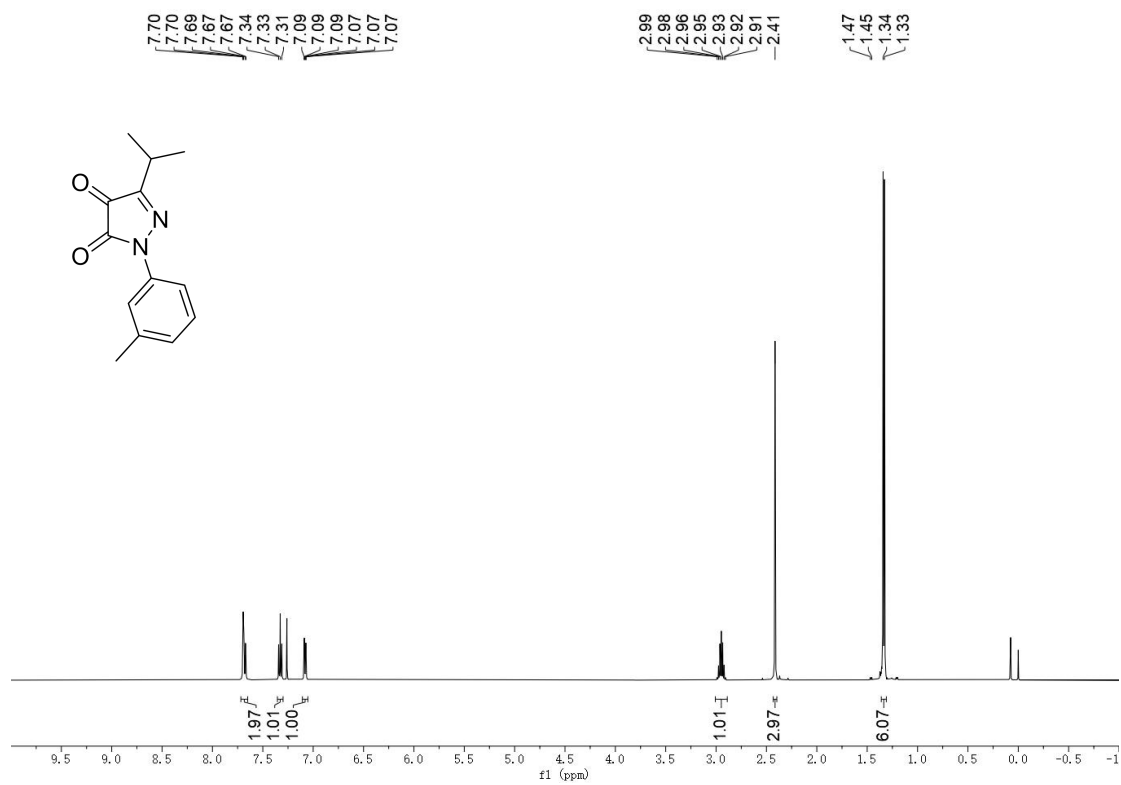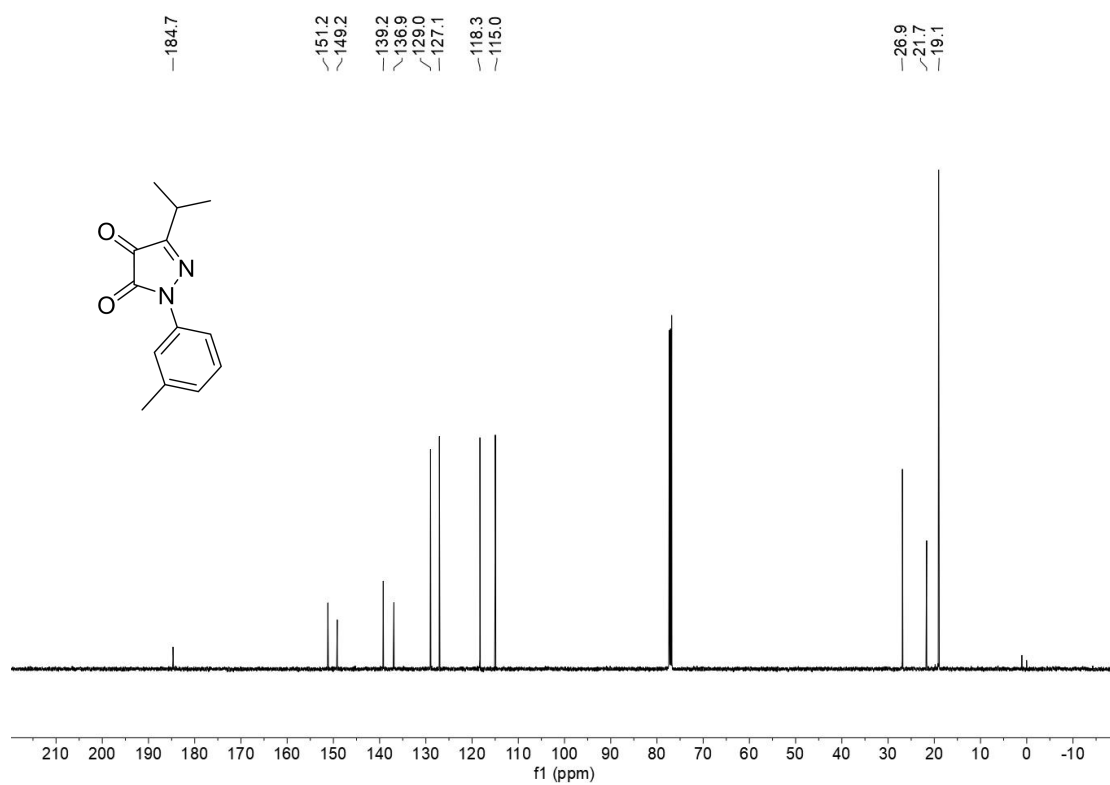

$^1\text{H}$  NMR and  $^{13}\text{C}$  NMR of **11**

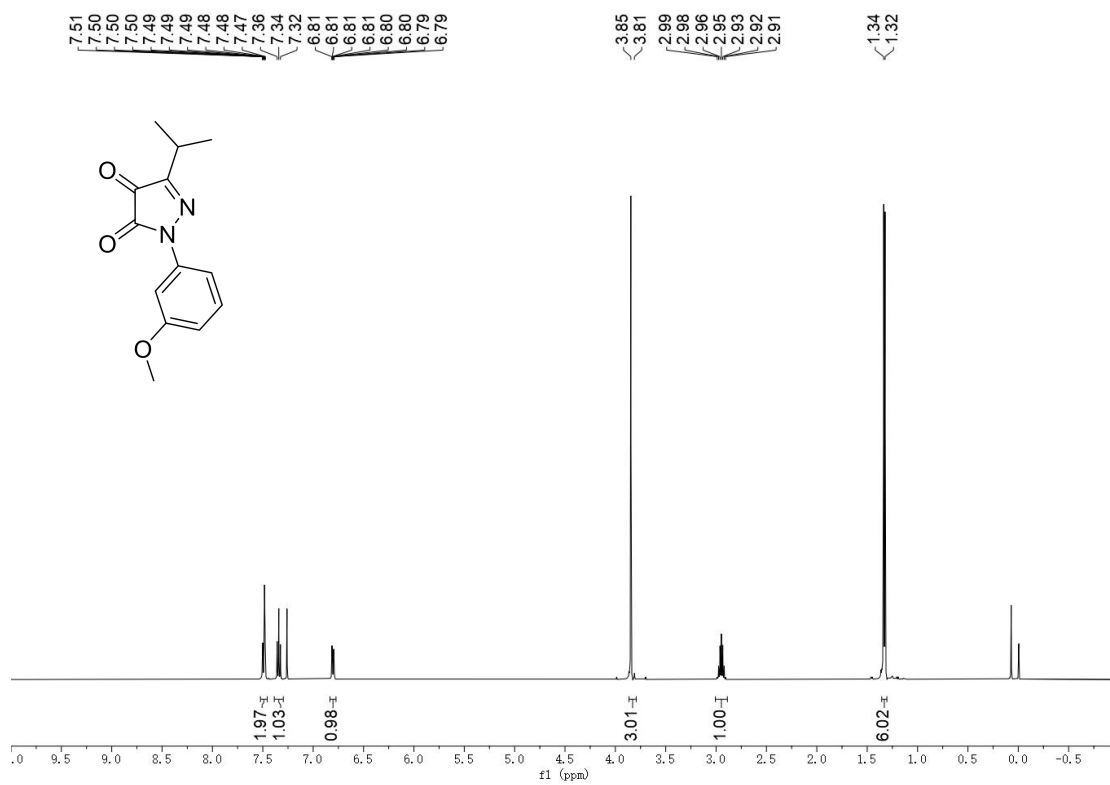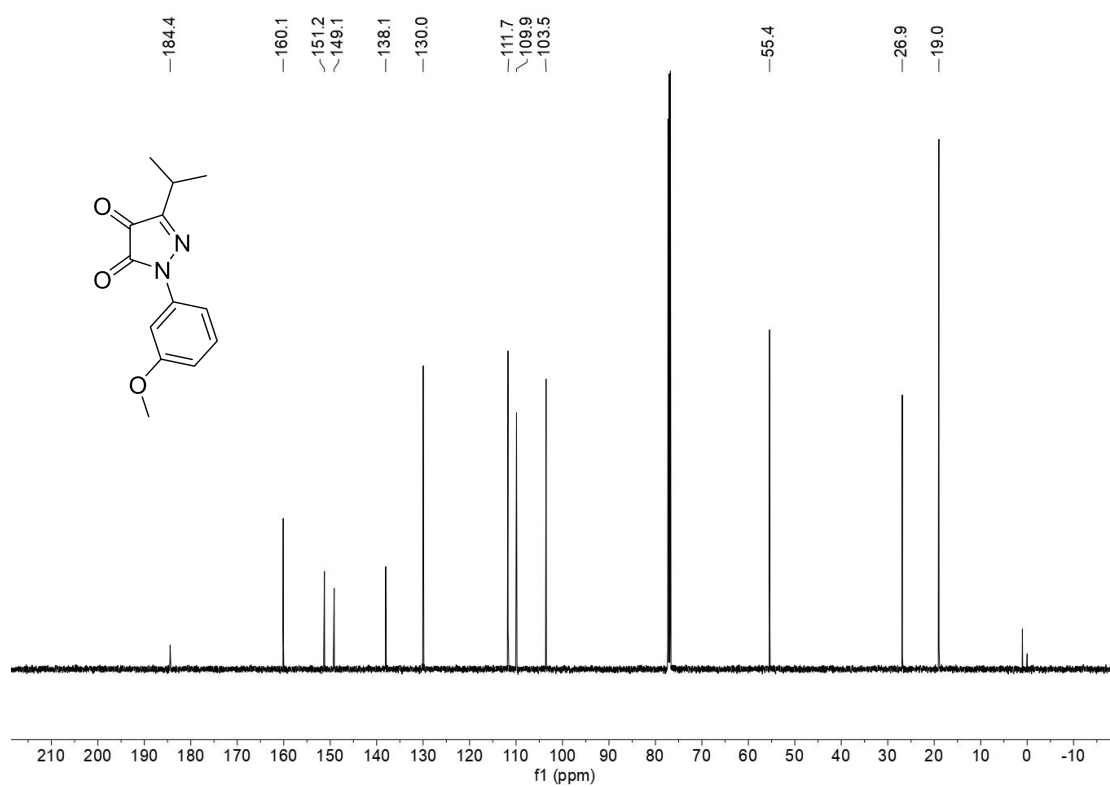

<sup>1</sup>H NMR, <sup>13</sup>C NMR and <sup>19</sup>F NMR of **1m**

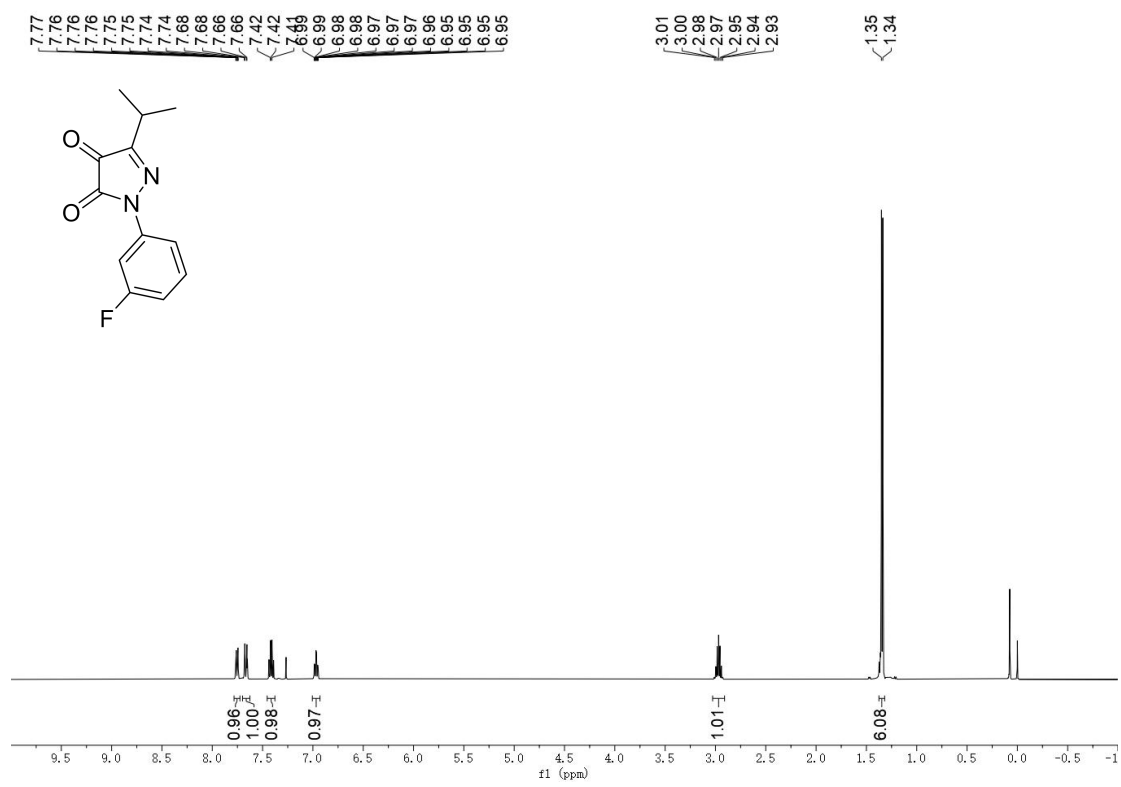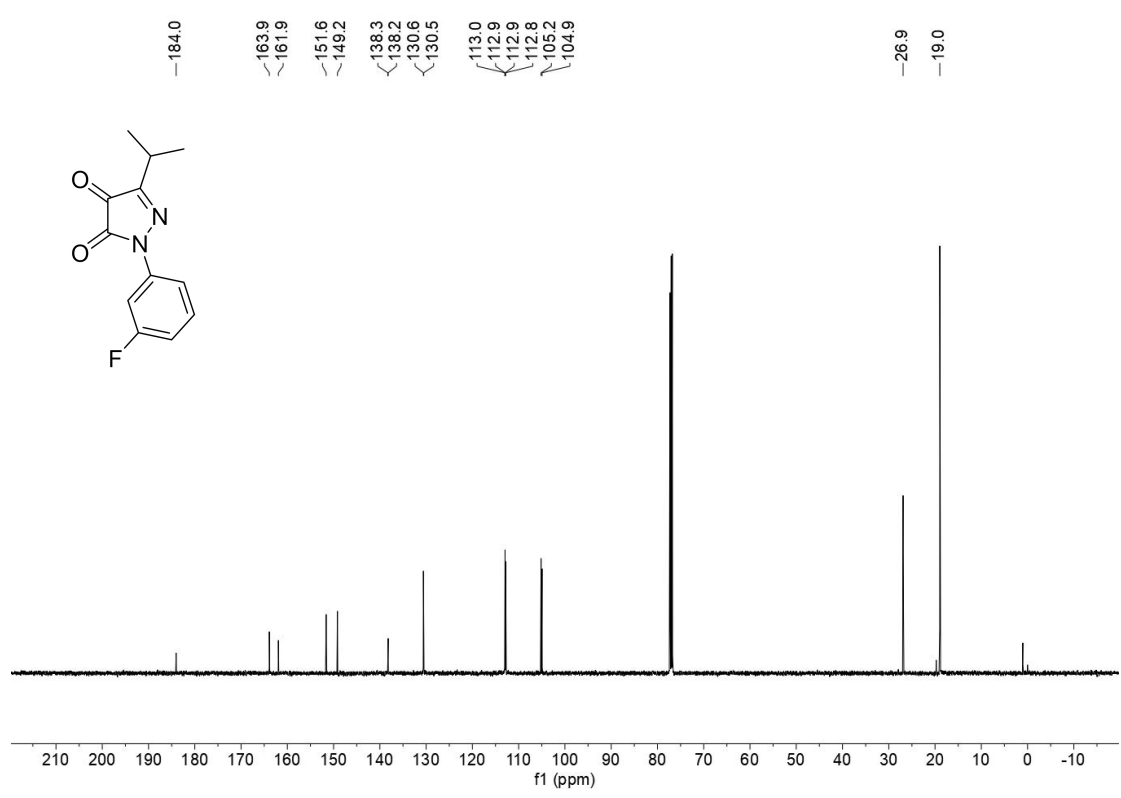

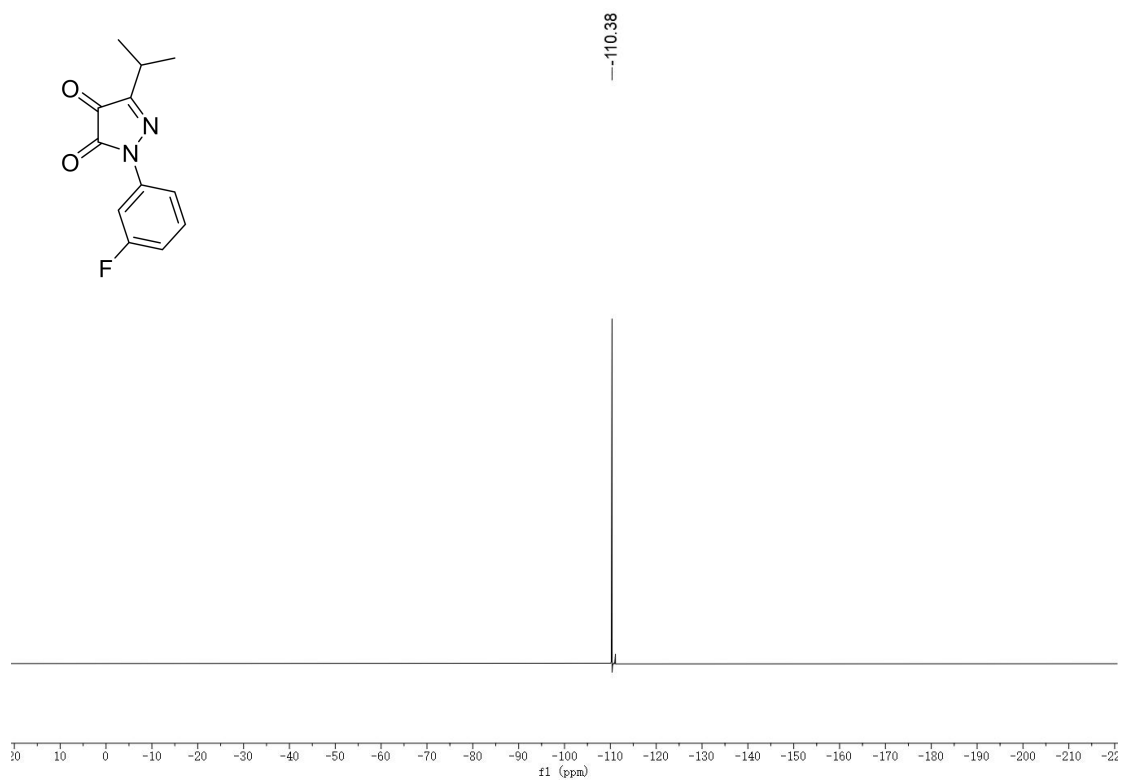

**<sup>1</sup>H NMR and <sup>13</sup>C NMR of 1n**

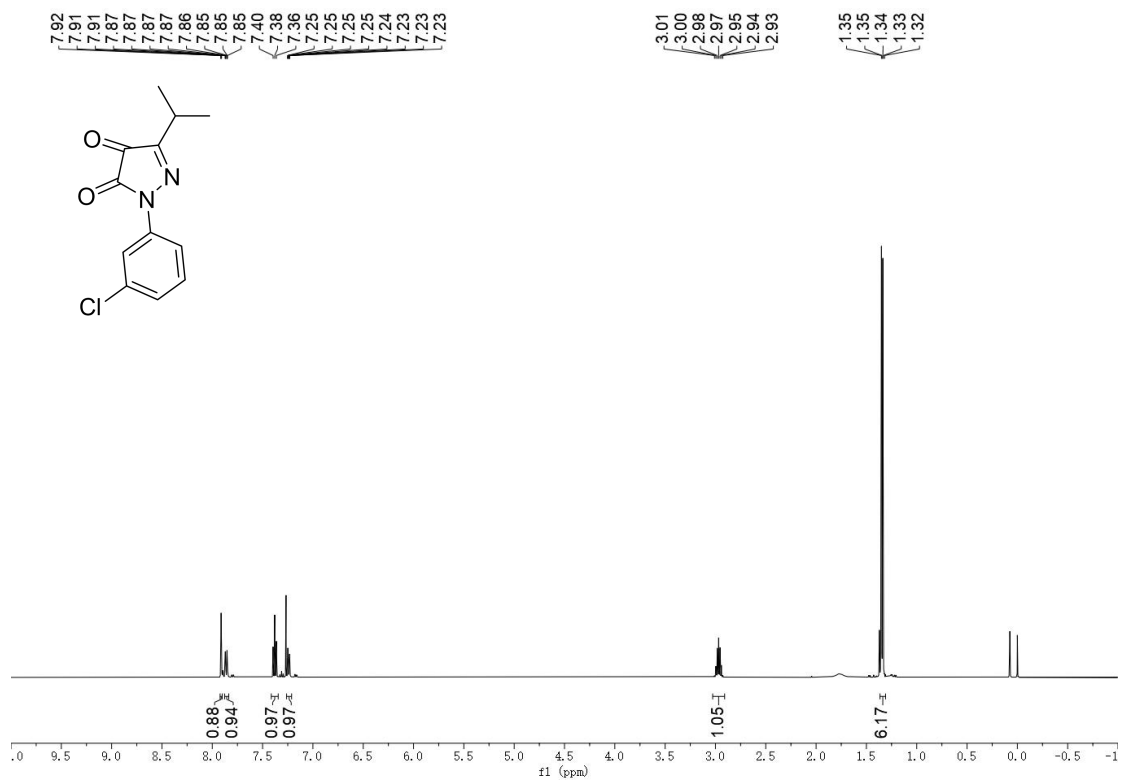

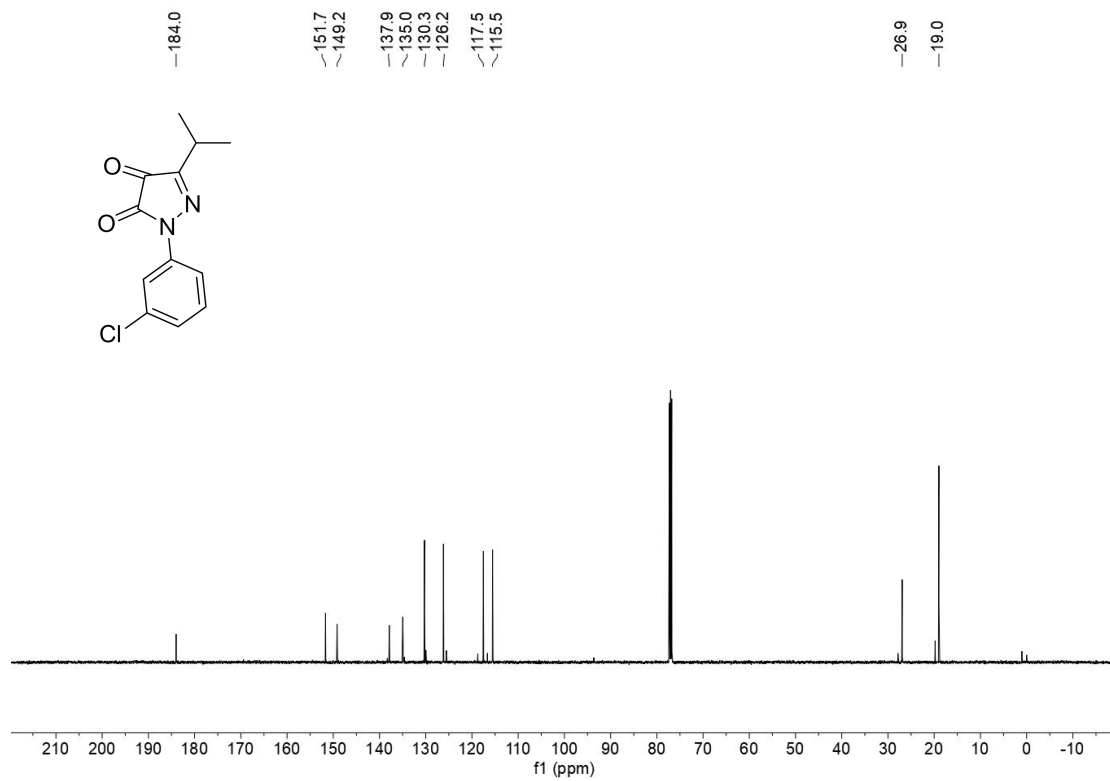

**<sup>1</sup>H NMR and <sup>13</sup>C NMR of 10**

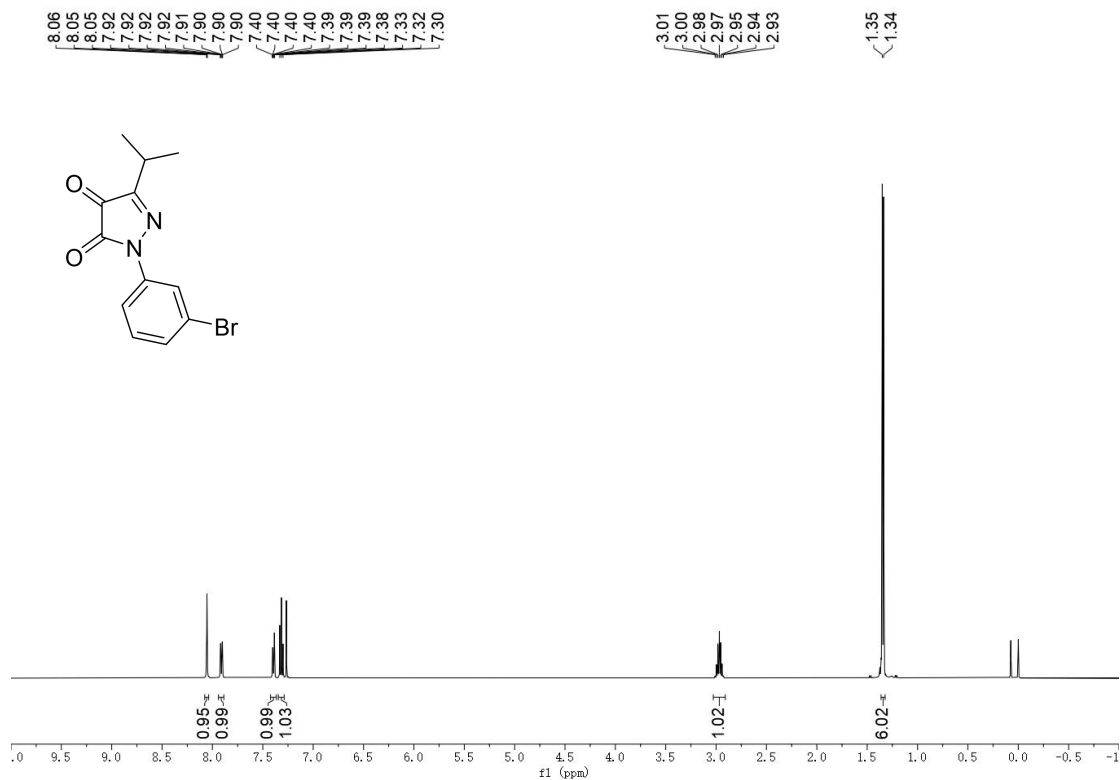



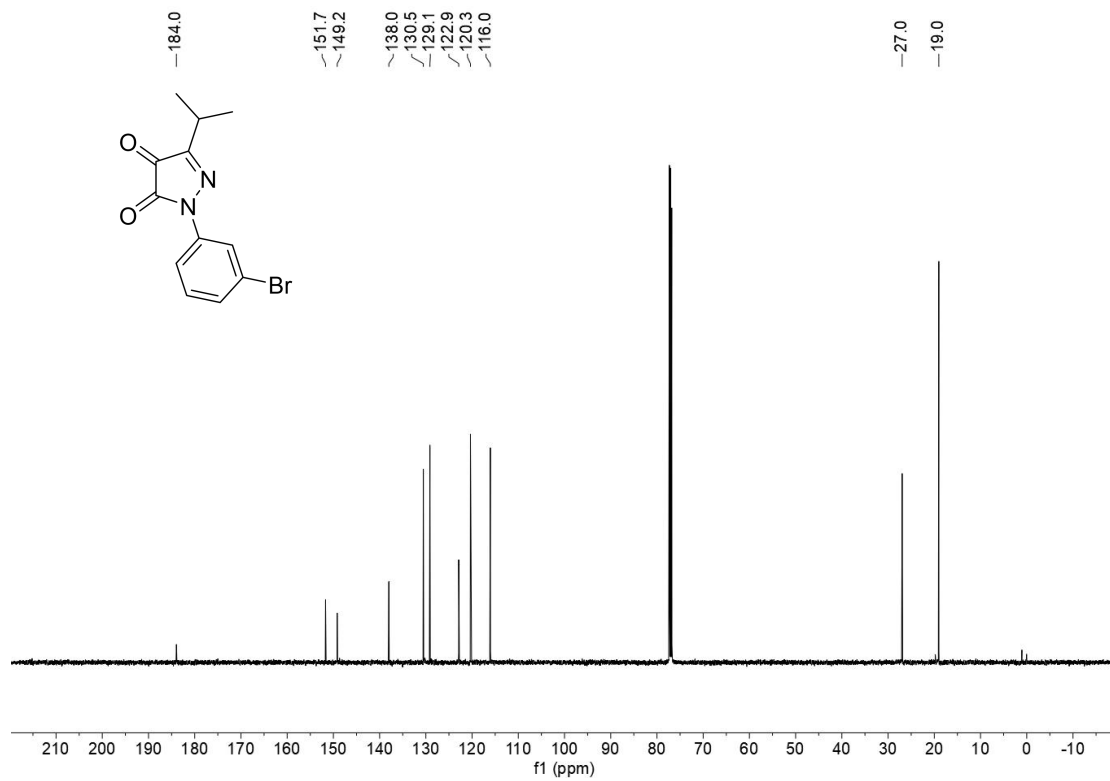

**<sup>1</sup>H NMR and <sup>13</sup>C NMR of 1q**

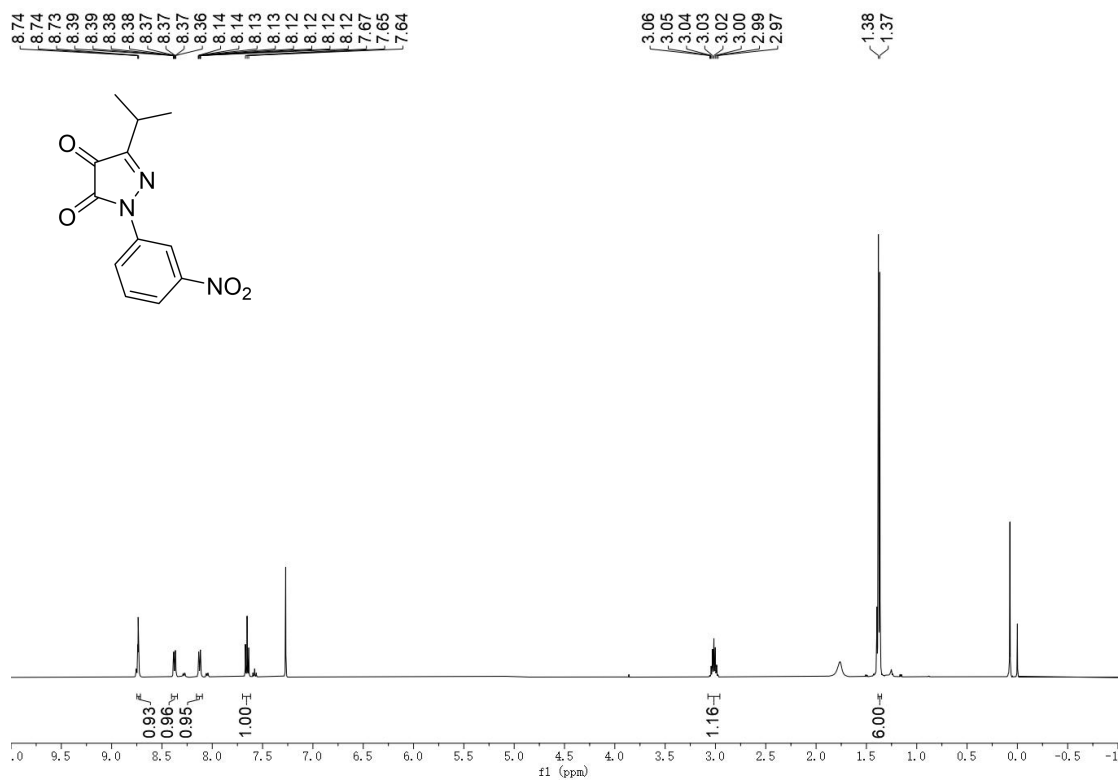

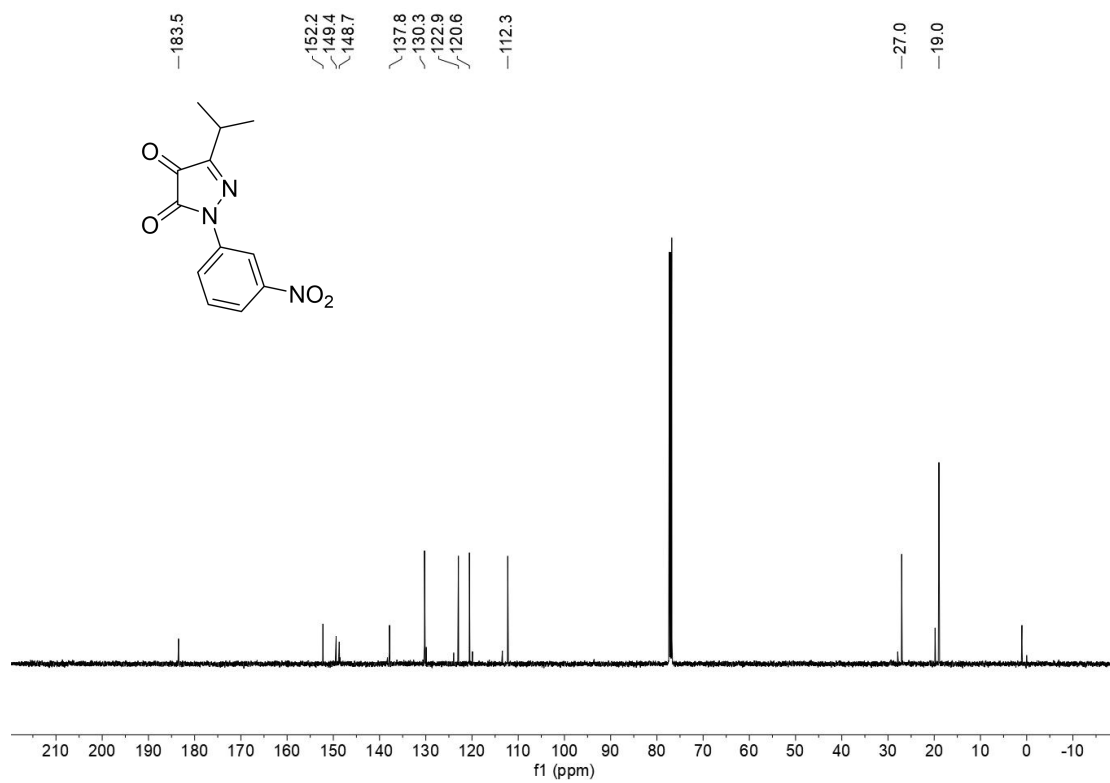

**<sup>1</sup>H NMR and <sup>13</sup>C NMR of 1s**

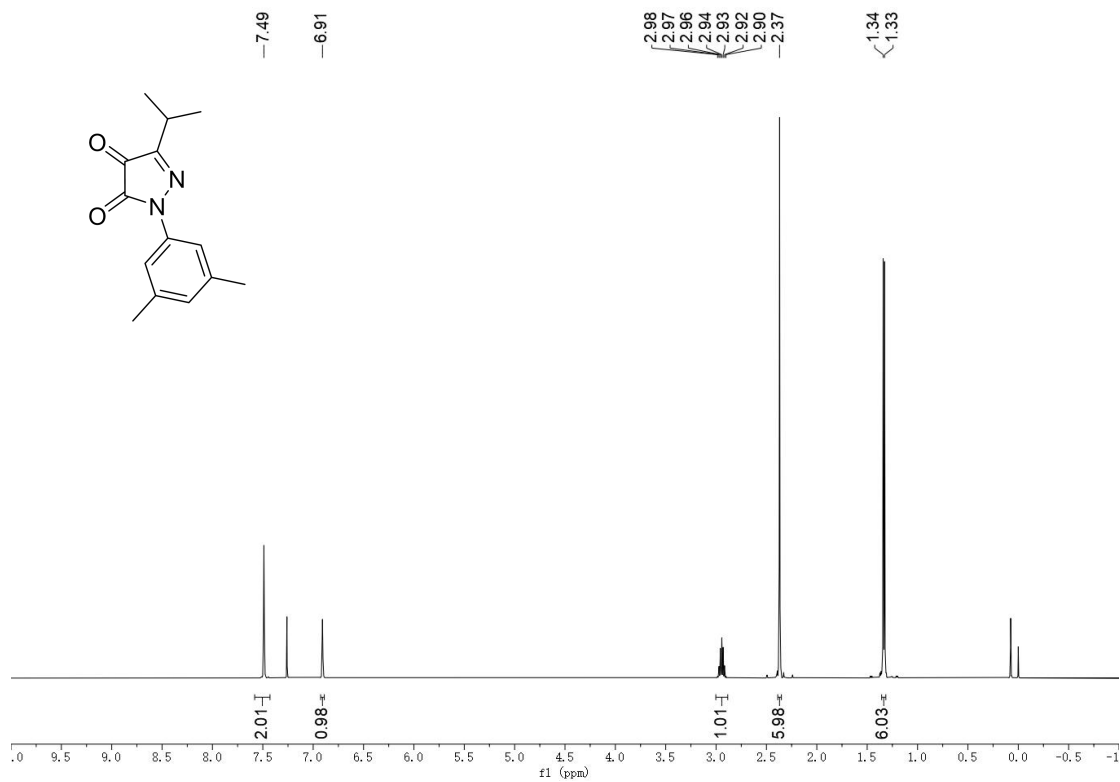

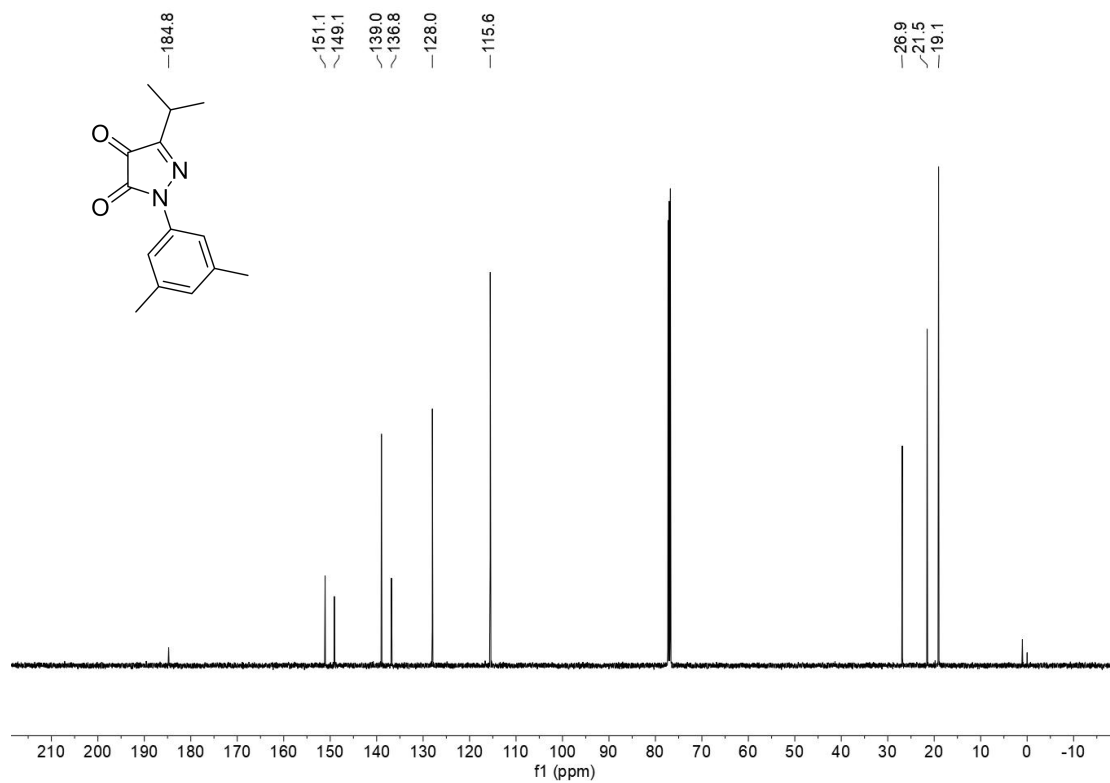

<sup>1</sup>H NMR and <sup>13</sup>C NMR of 1t

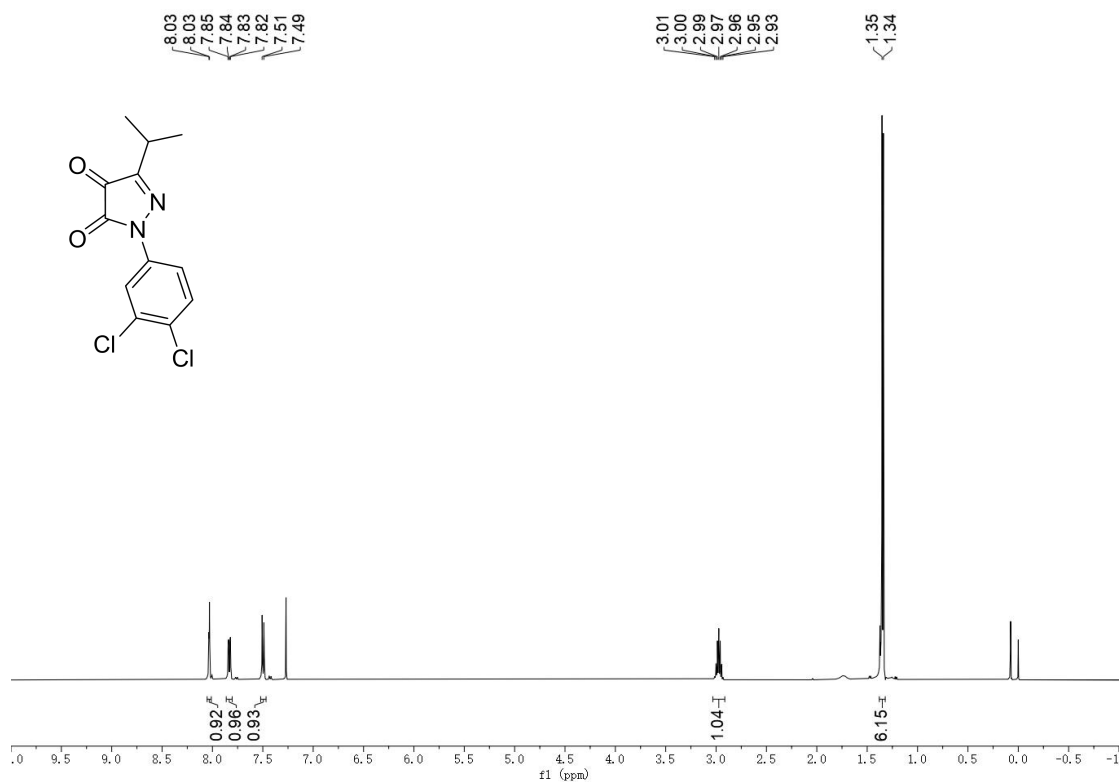

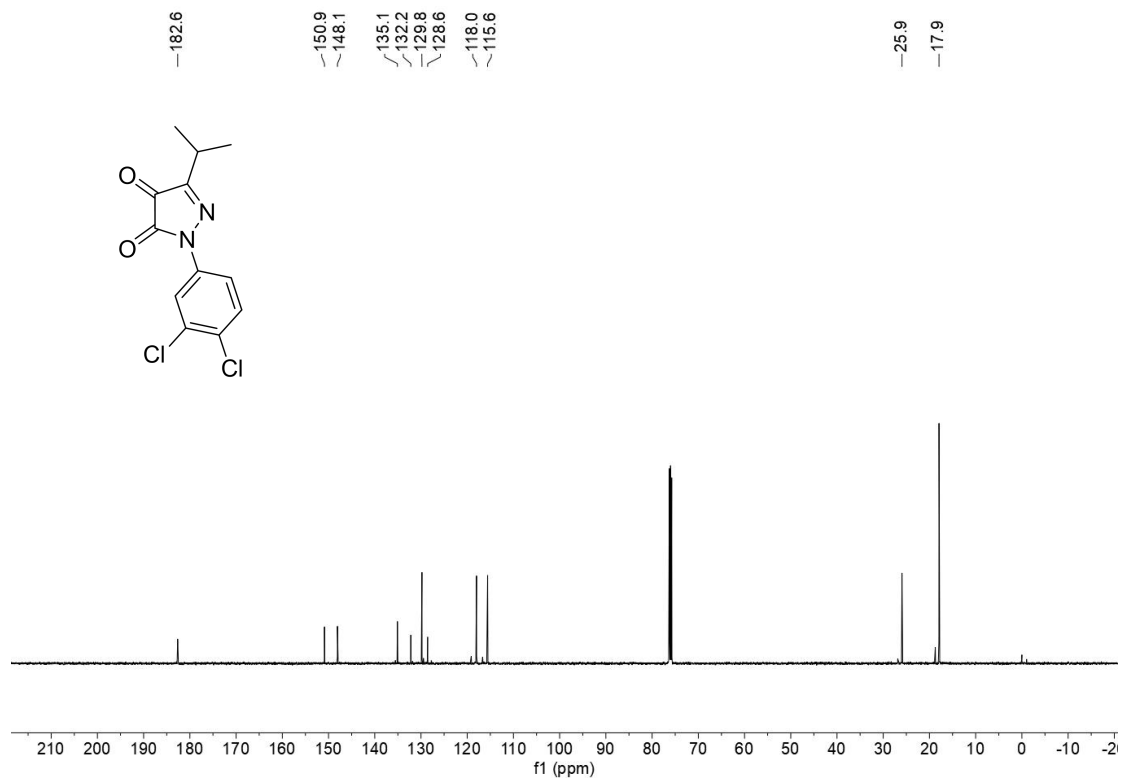

**<sup>1</sup>H NMR and <sup>13</sup>C NMR of 1u**

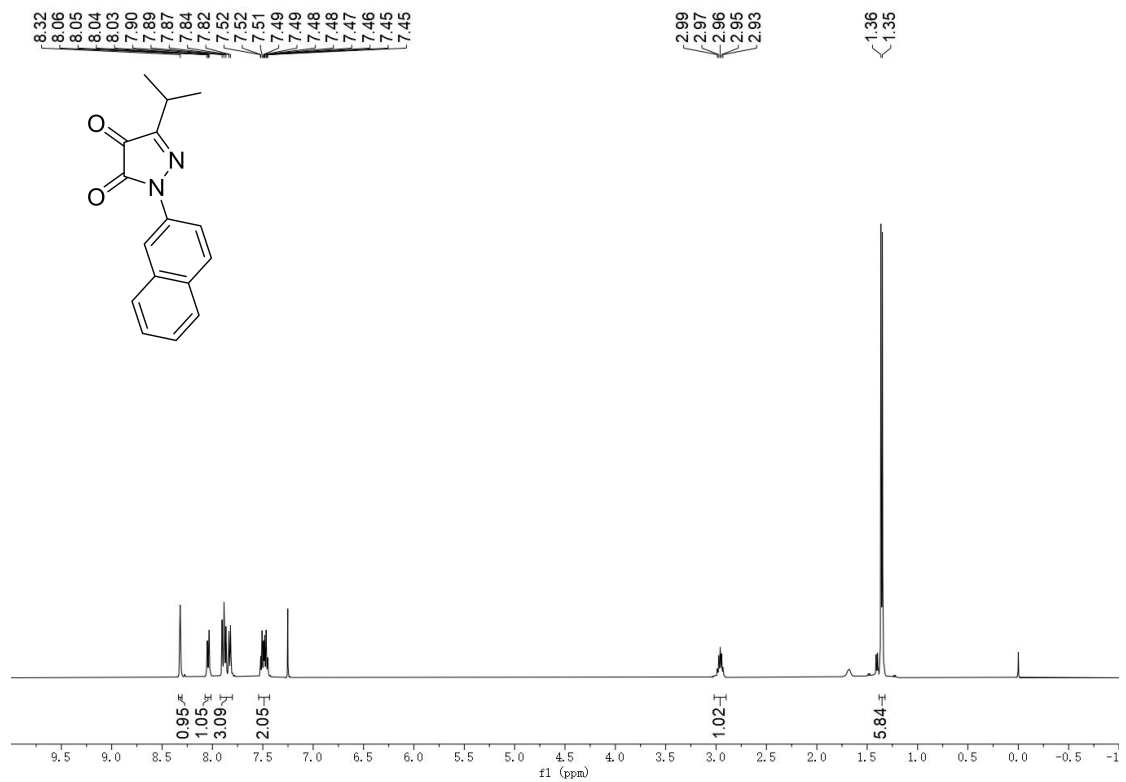

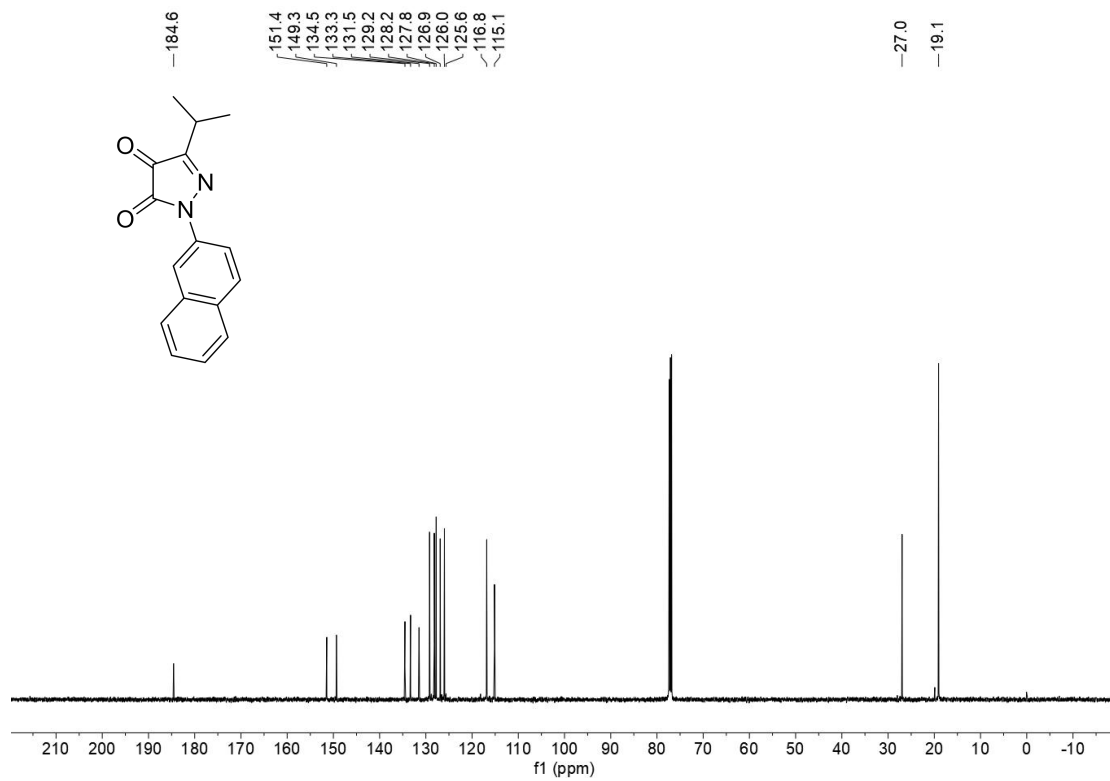

<sup>1</sup>H NMR and <sup>13</sup>C NMR of **1v**

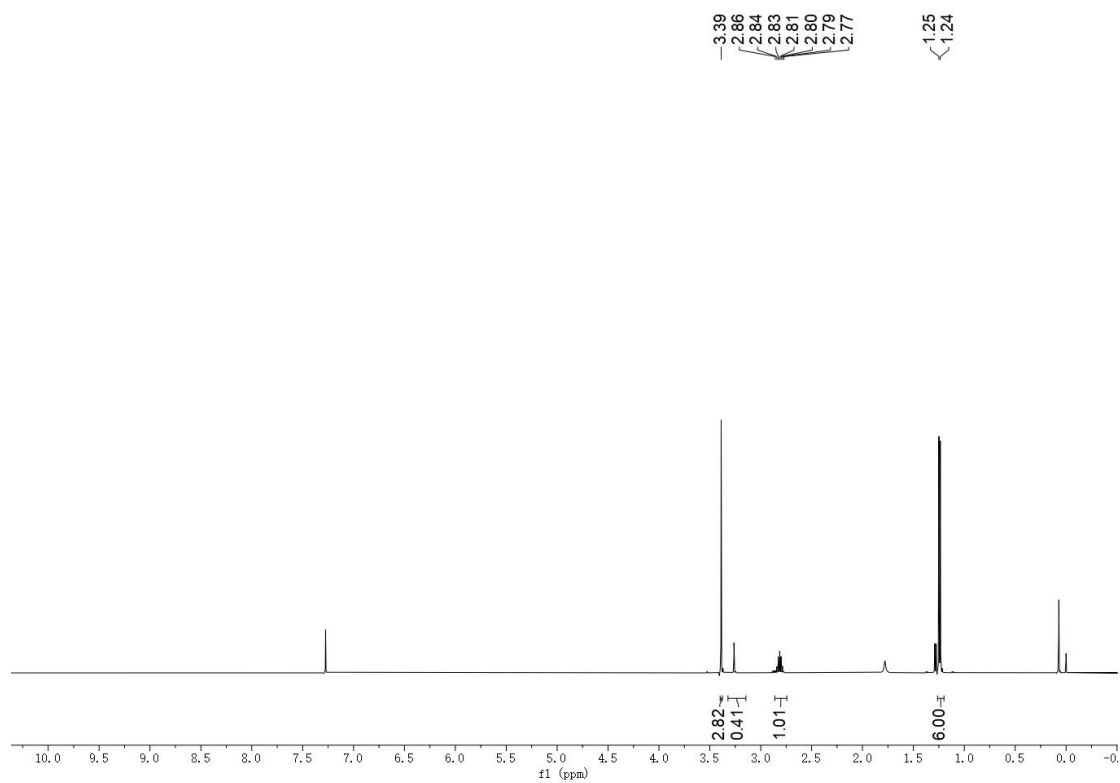

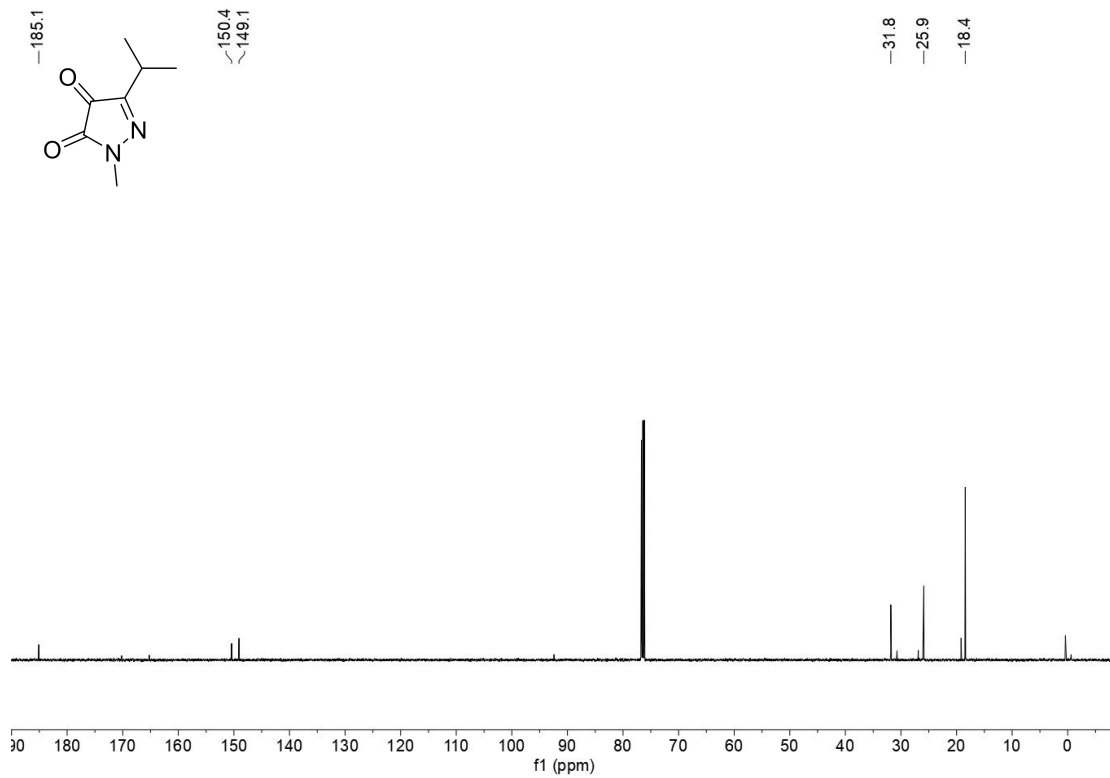

**<sup>1</sup>H NMR and <sup>13</sup>C NMR of 3aa**

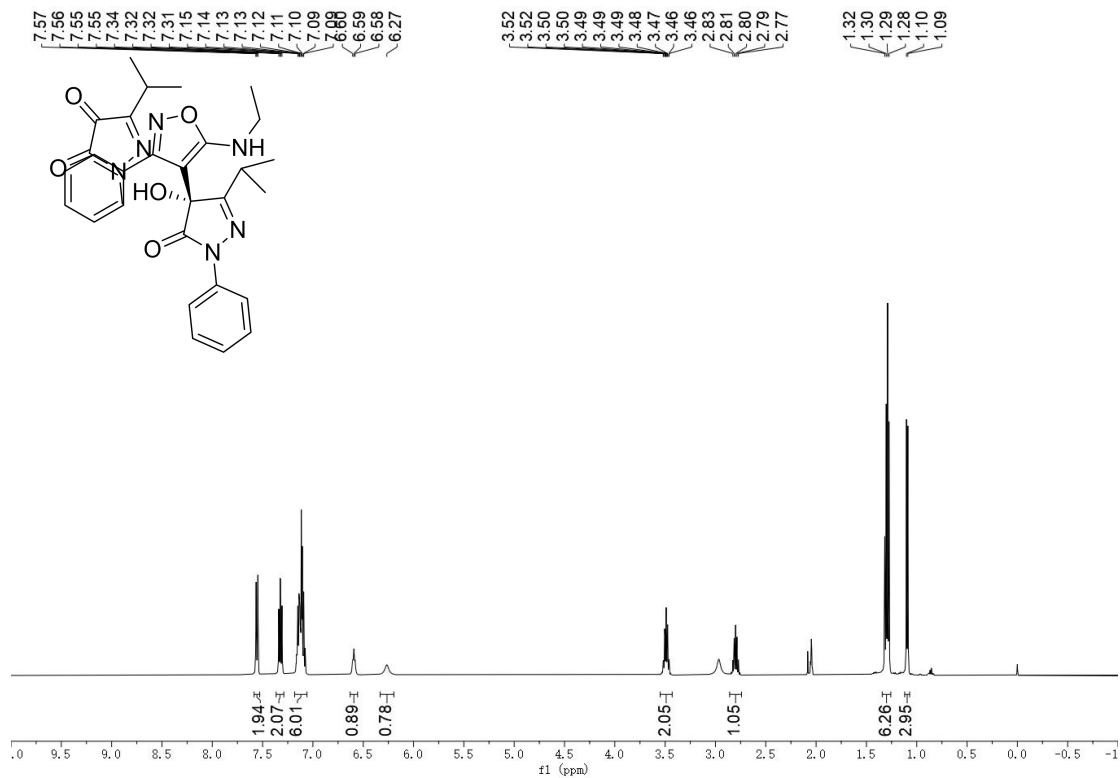

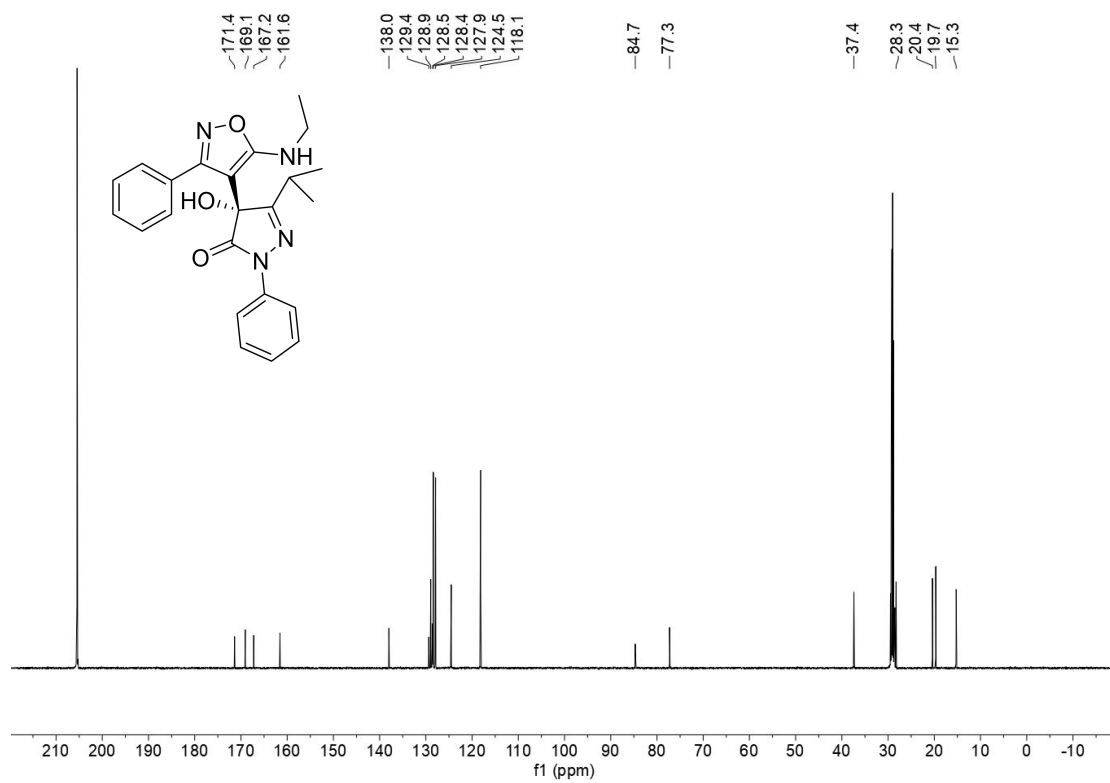

### <sup>1</sup>H NMR and <sup>13</sup>C NMR of **3ba**

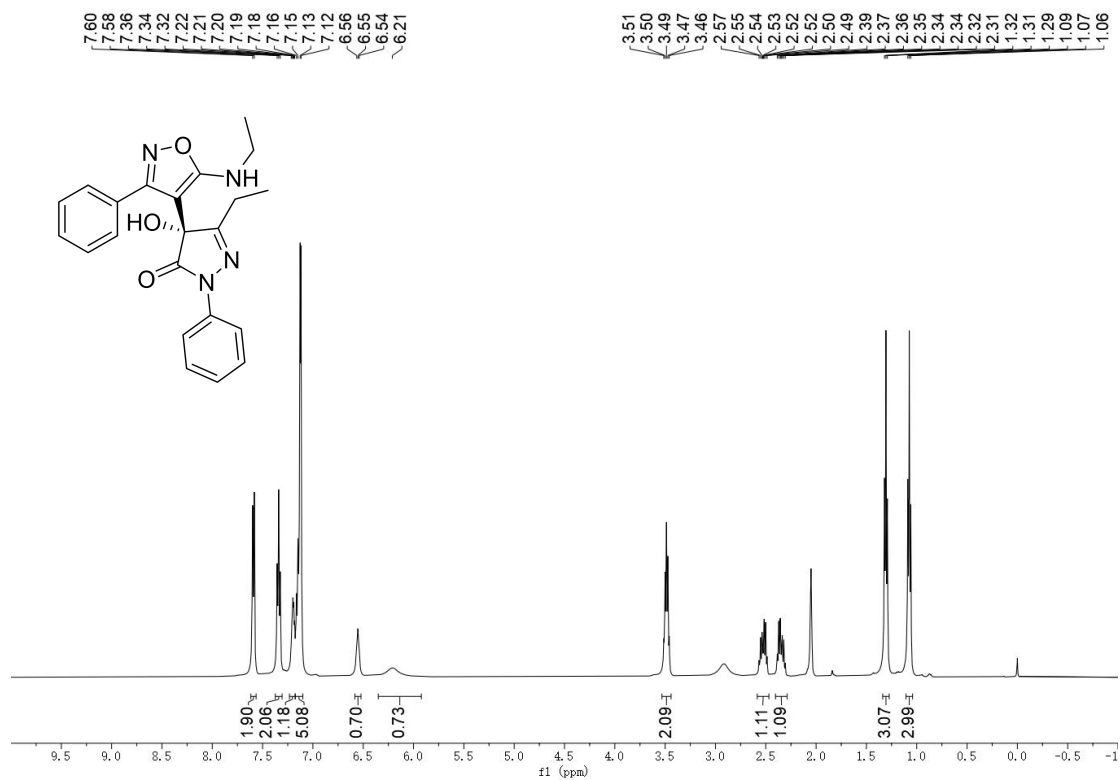

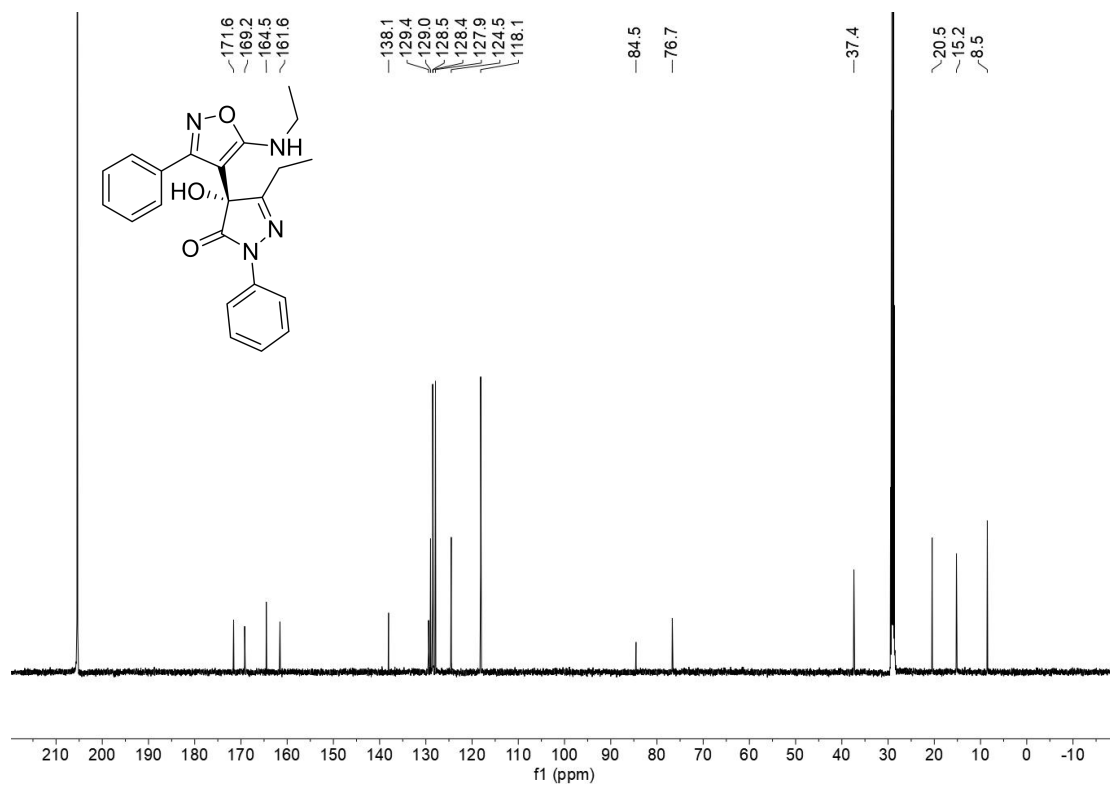

**<sup>1</sup>H NMR and <sup>13</sup>C NMR of 3ca**

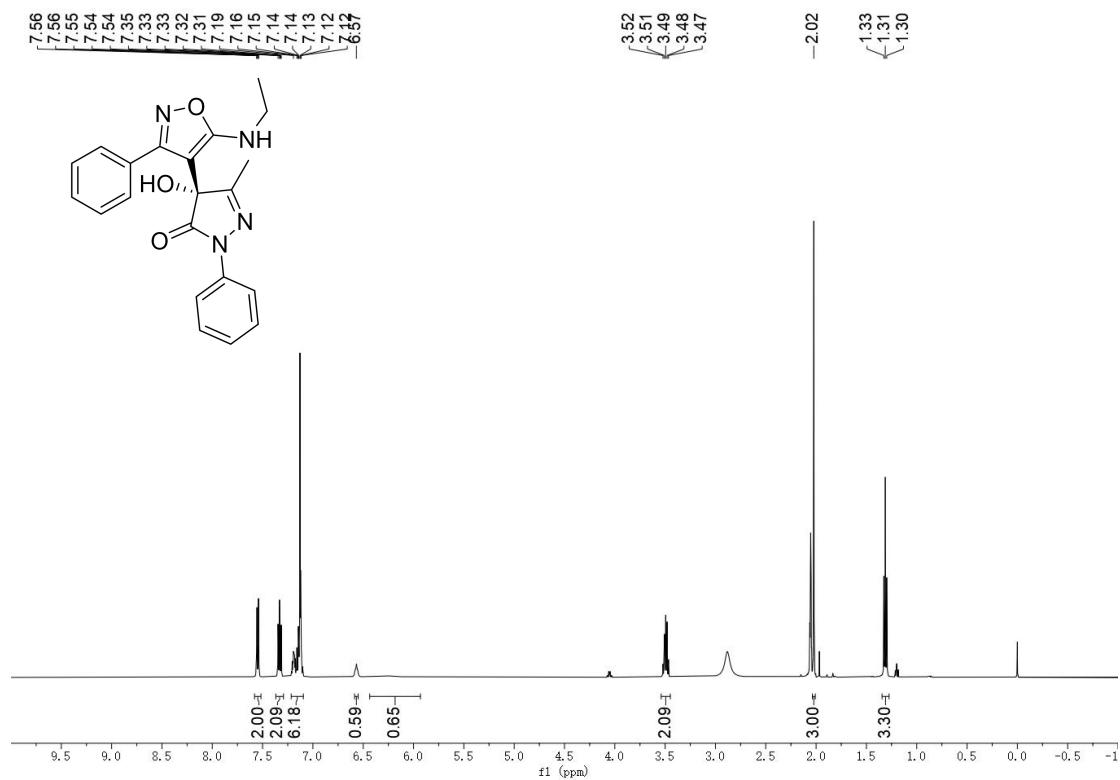



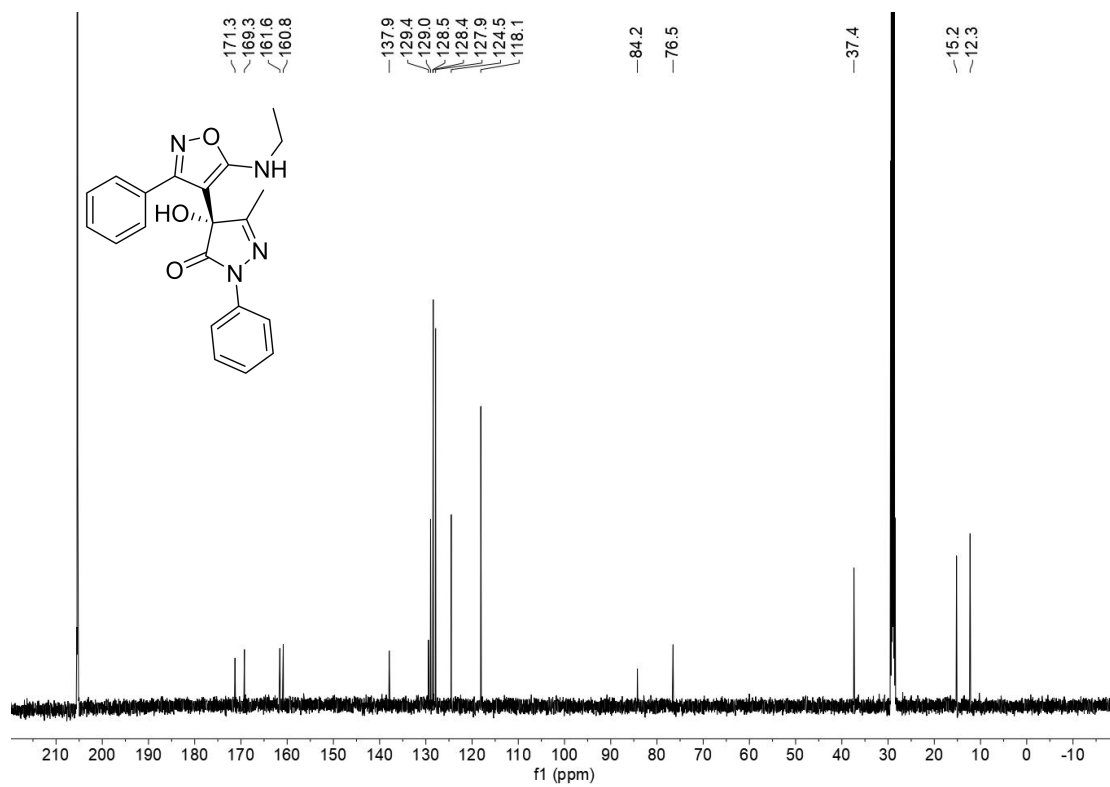

**<sup>1</sup>H NMR and <sup>13</sup>C NMR of 3da**

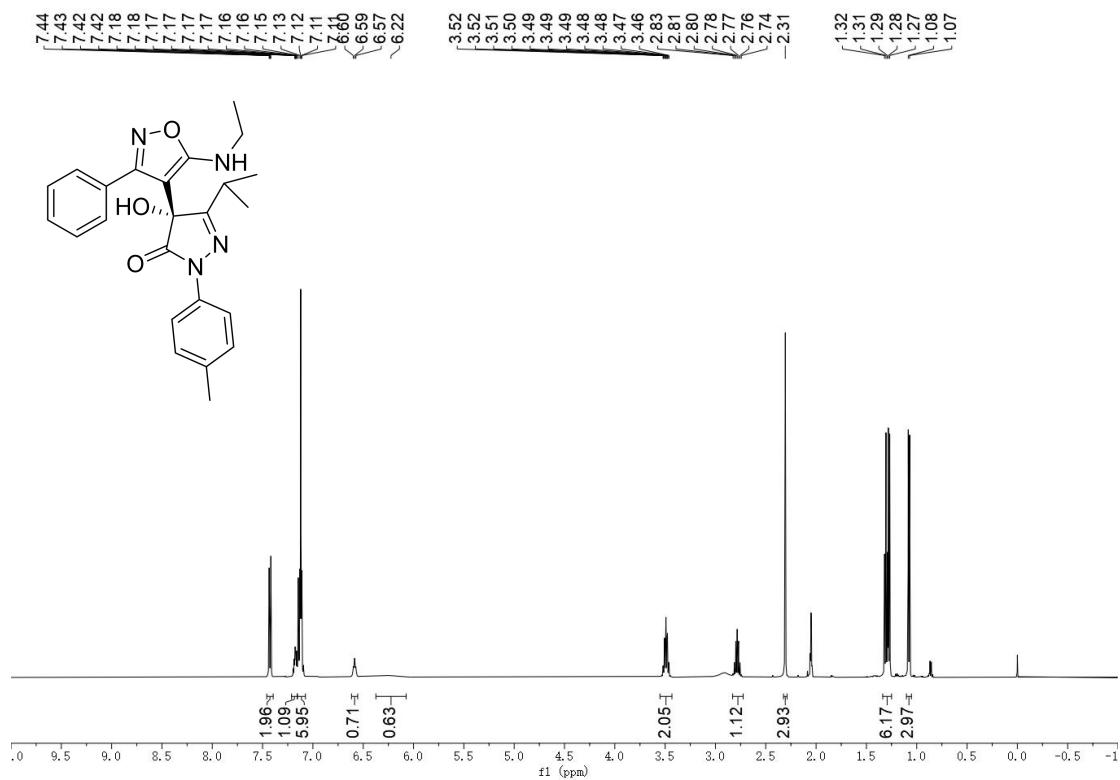

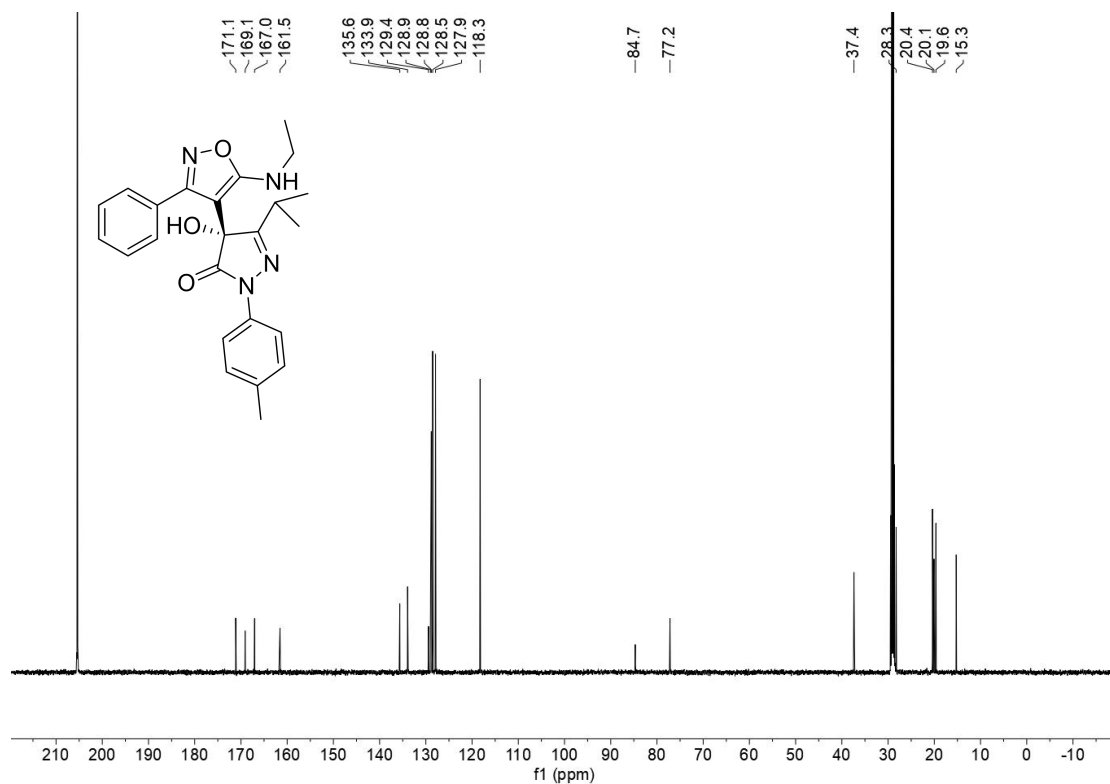

<sup>1</sup>H NMR and <sup>13</sup>C NMR of 3ea

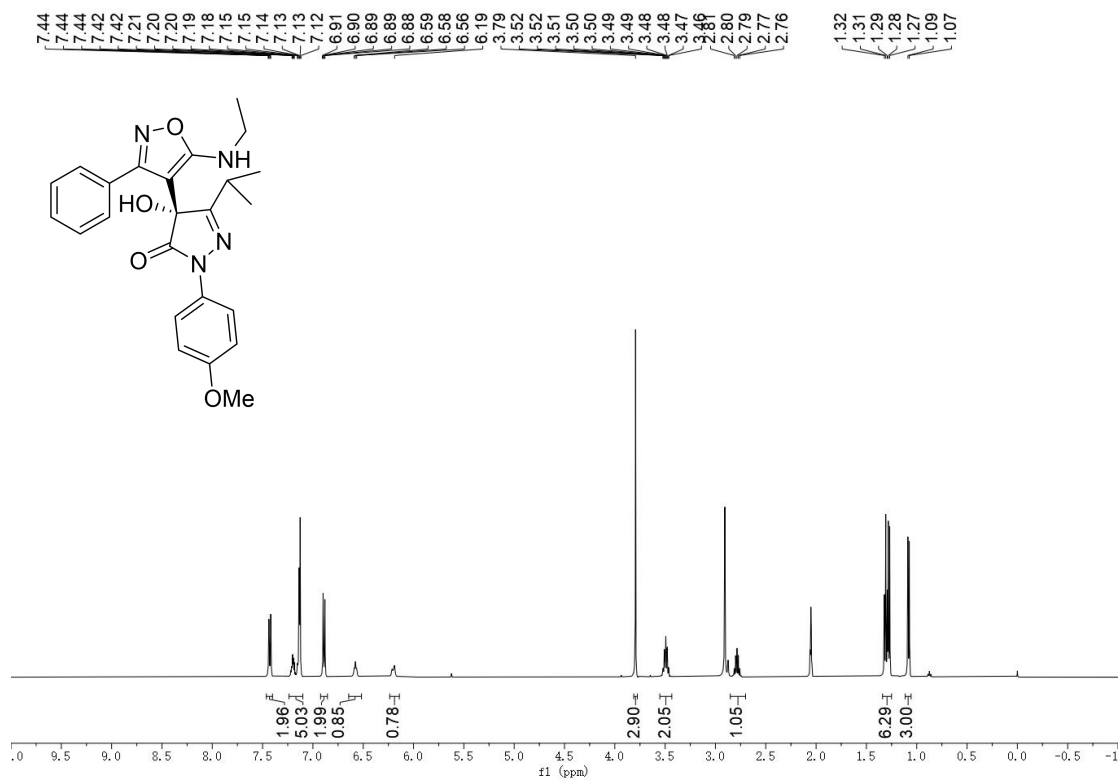

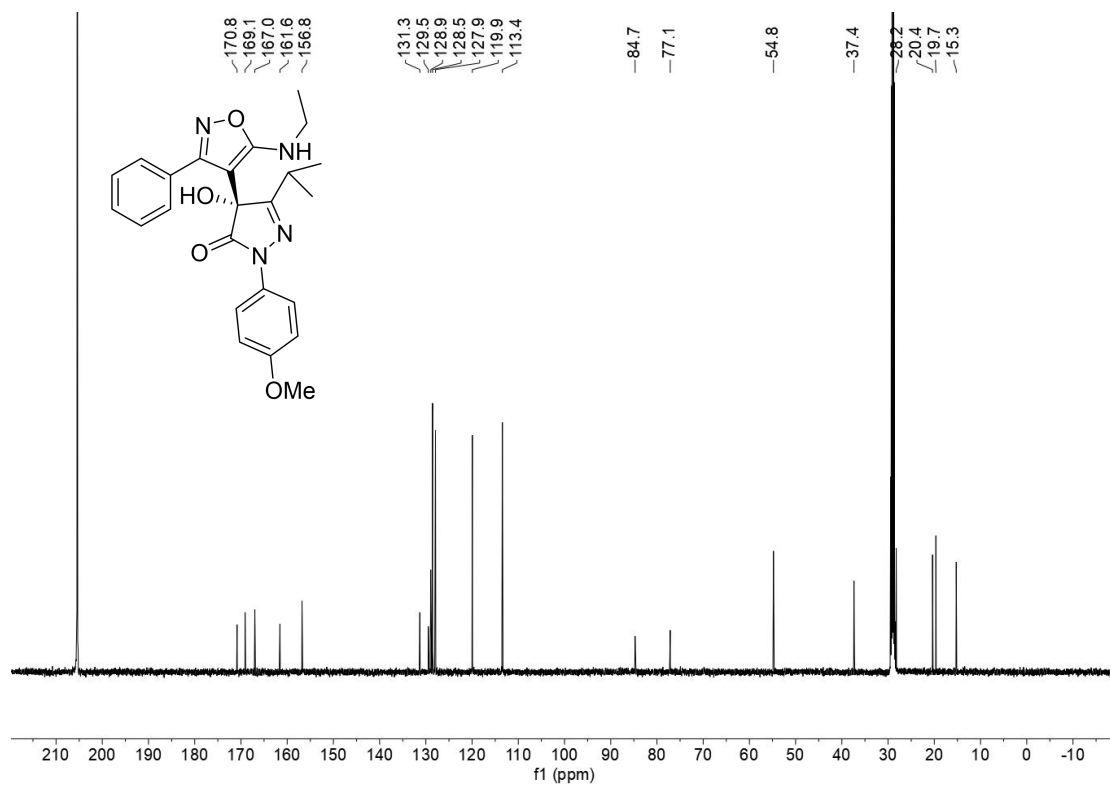

**<sup>1</sup>H NMR and <sup>13</sup>C NMR of 3fa**

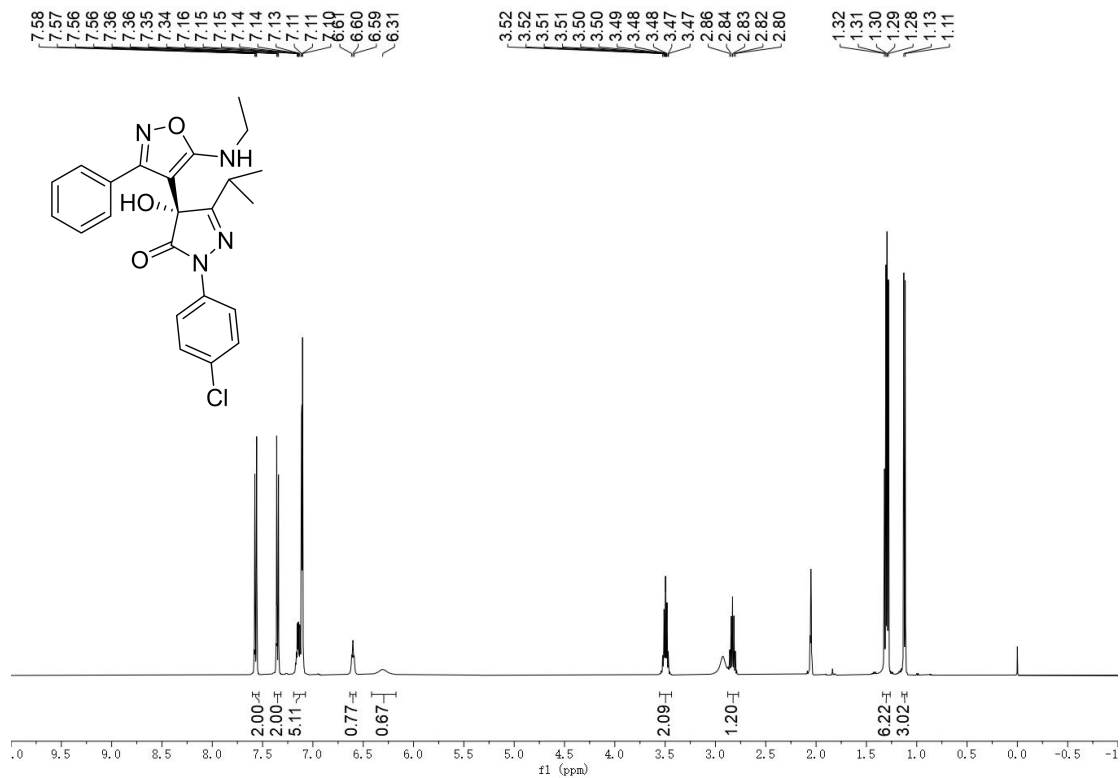

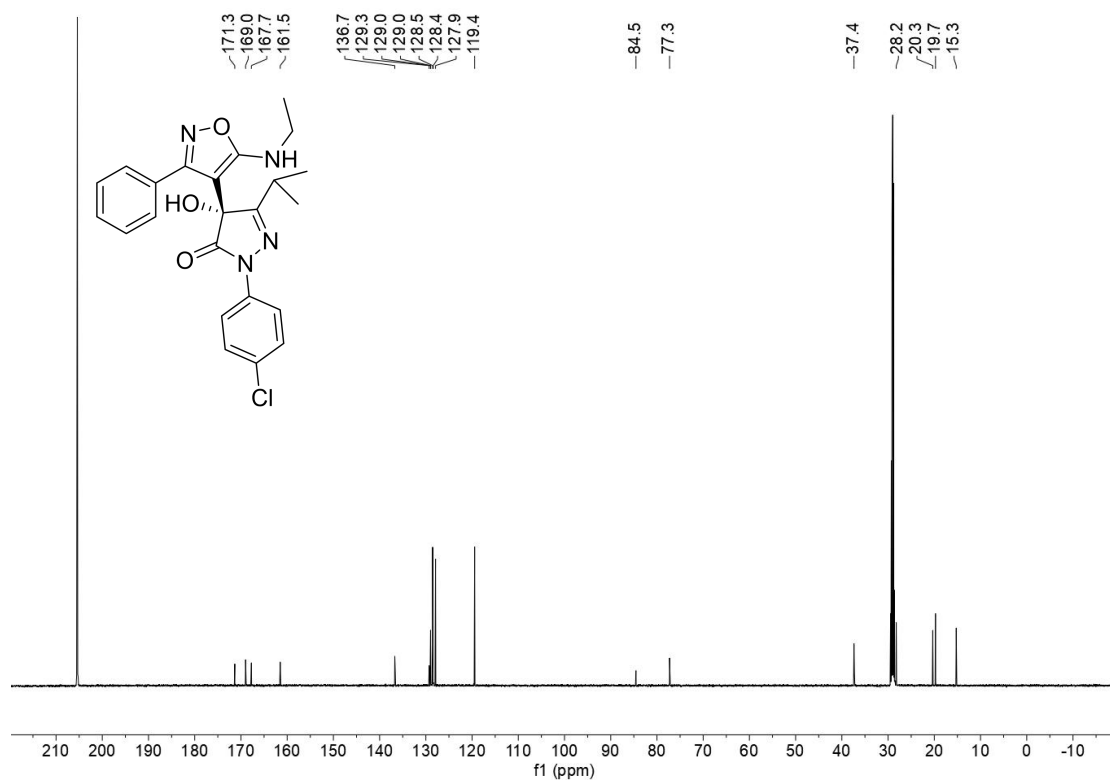

**<sup>1</sup>H NMR, <sup>13</sup>C NMR and <sup>19</sup>F NMR of 3ga**

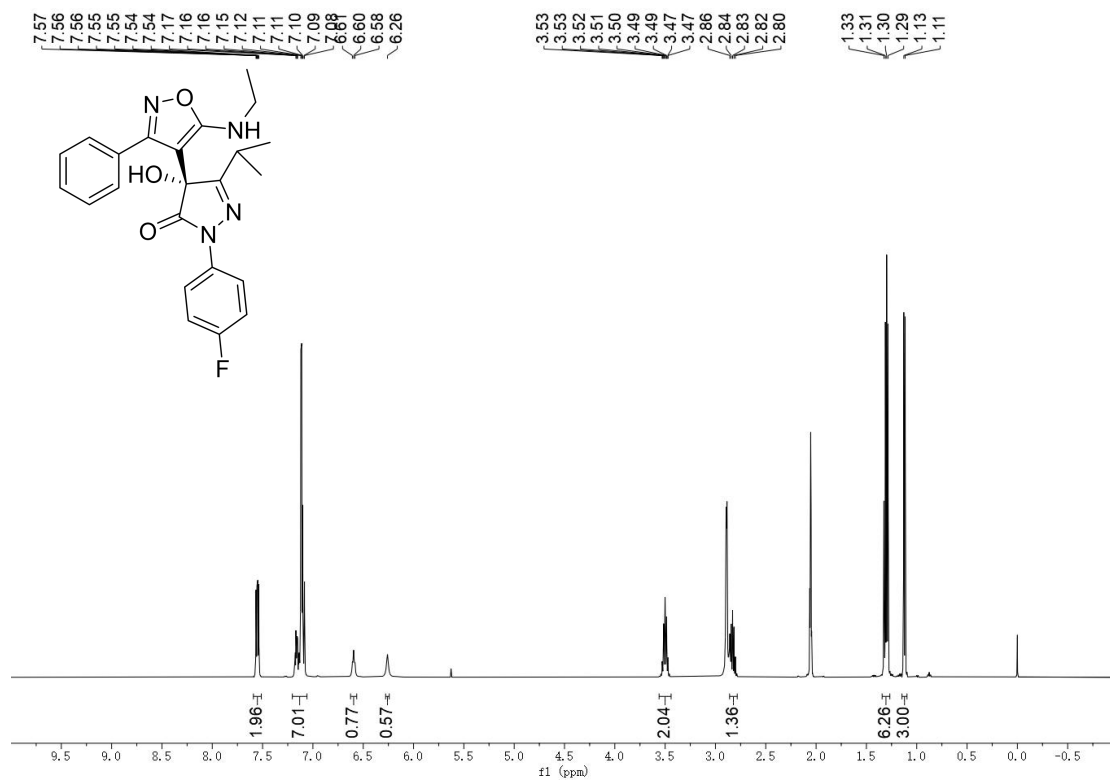

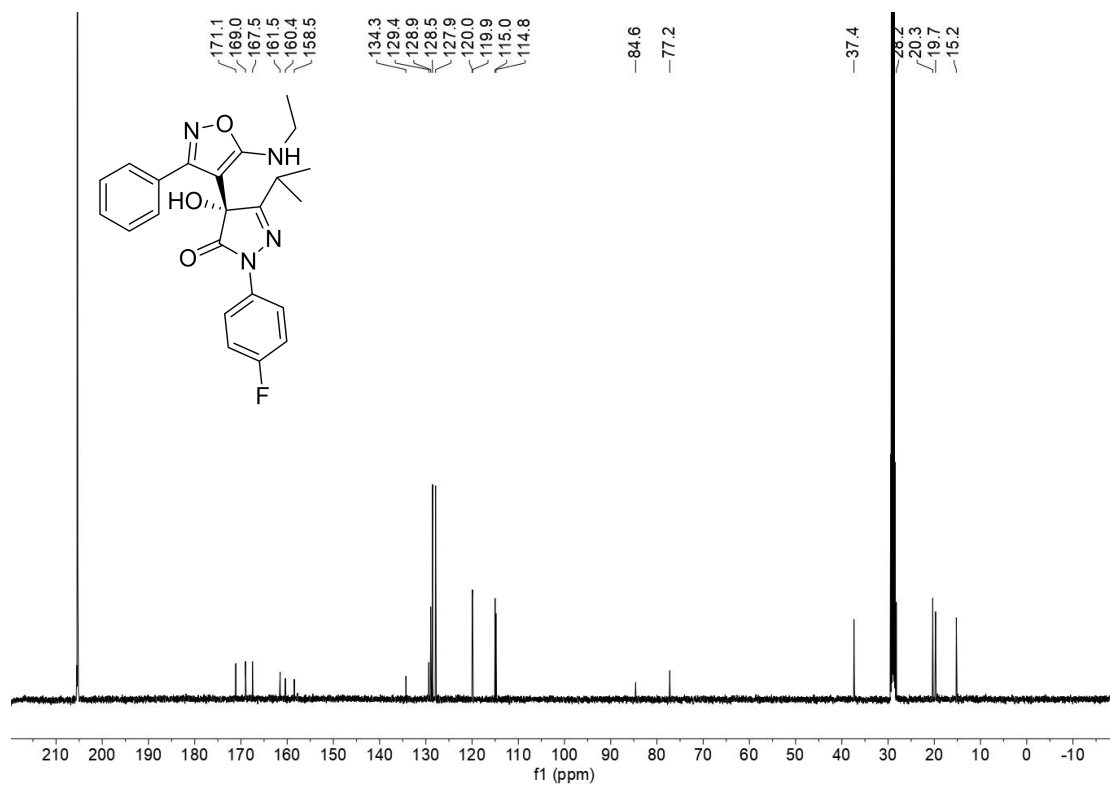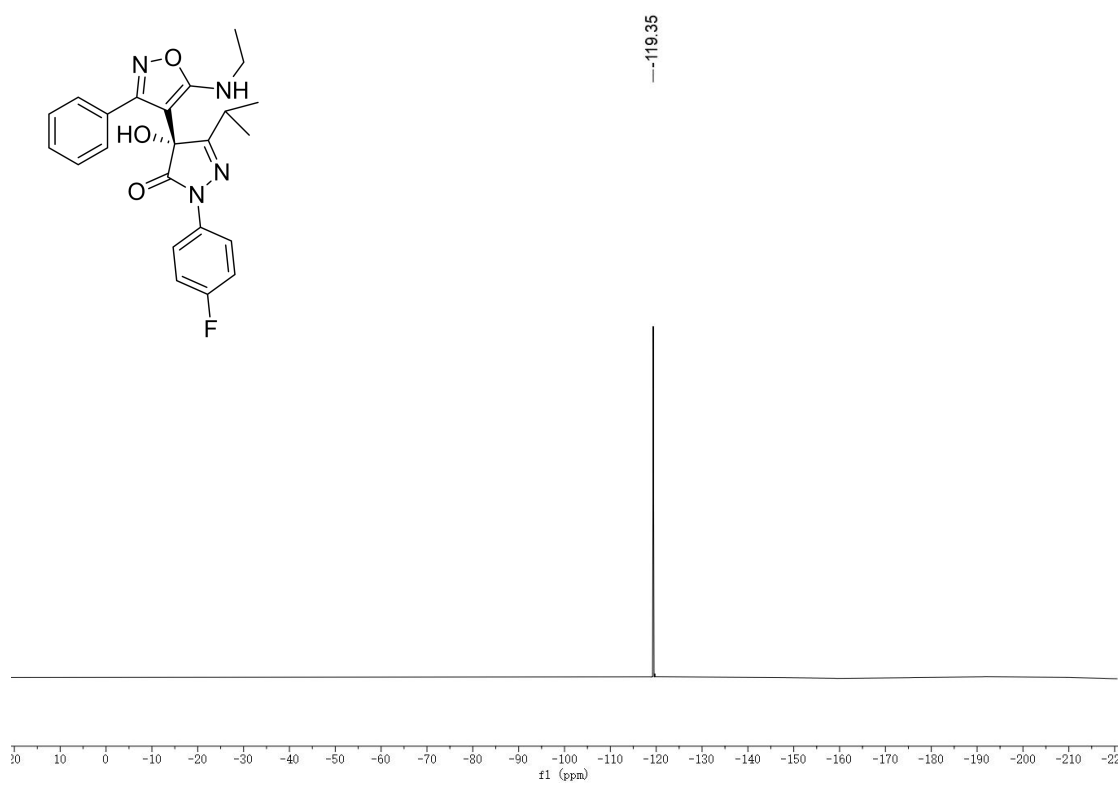

<sup>1</sup>H NMR and <sup>13</sup>C NMR of **3ha**

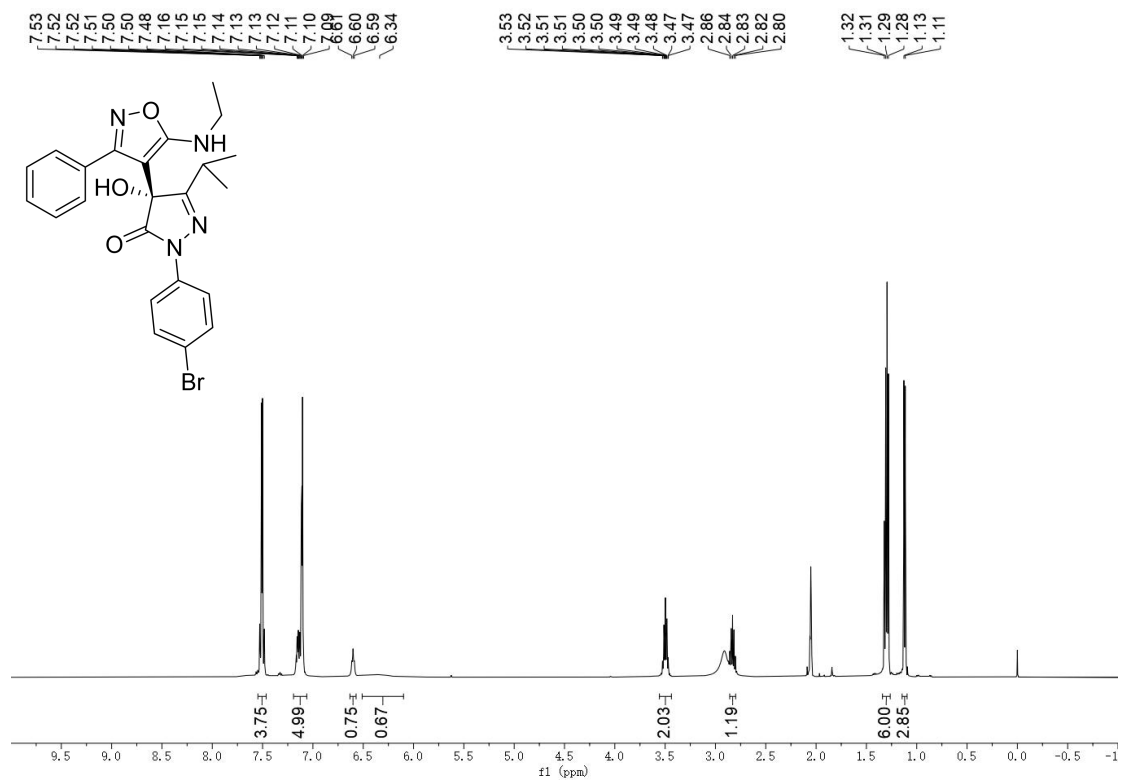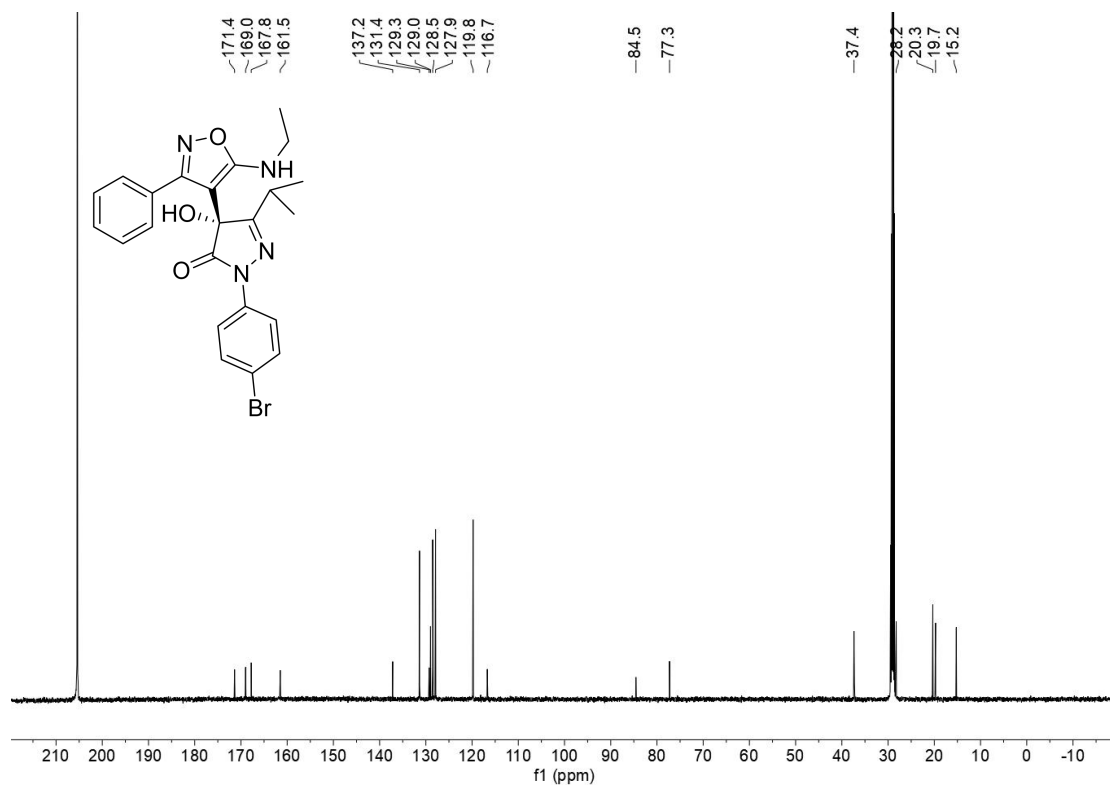

<sup>1</sup>H NMR, <sup>13</sup>C NMR and <sup>19</sup>F NMR of **3ia**

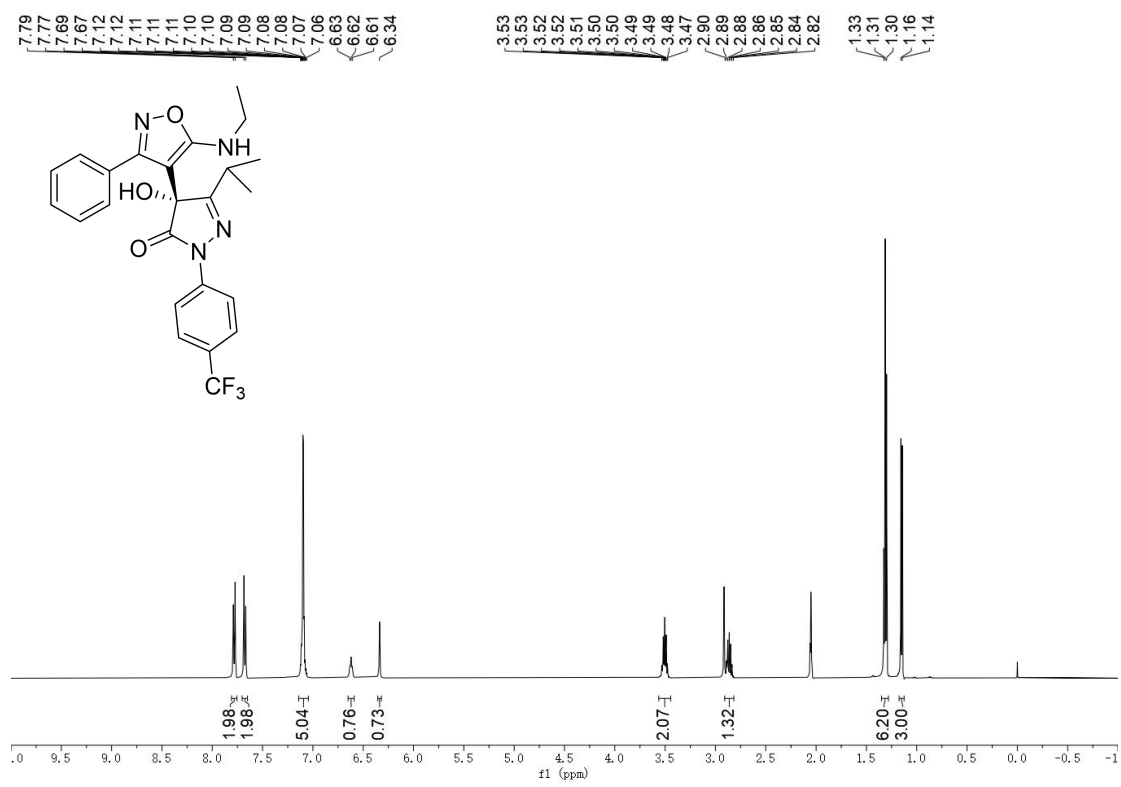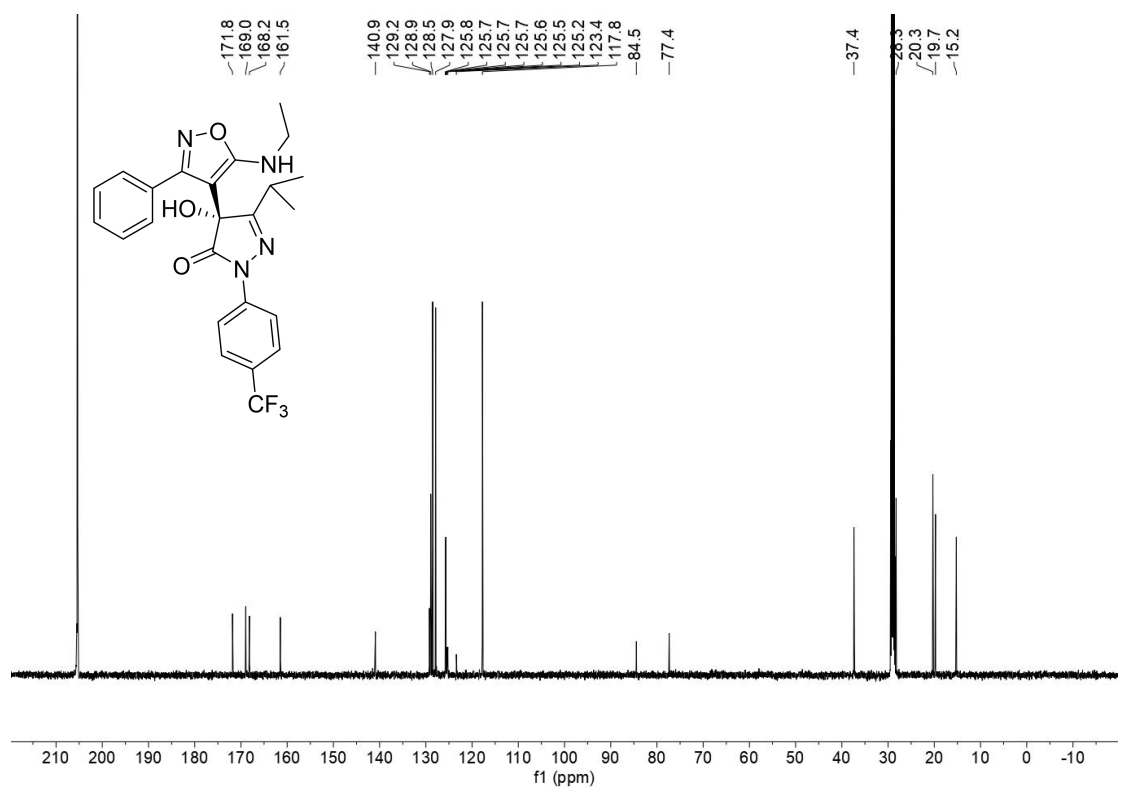

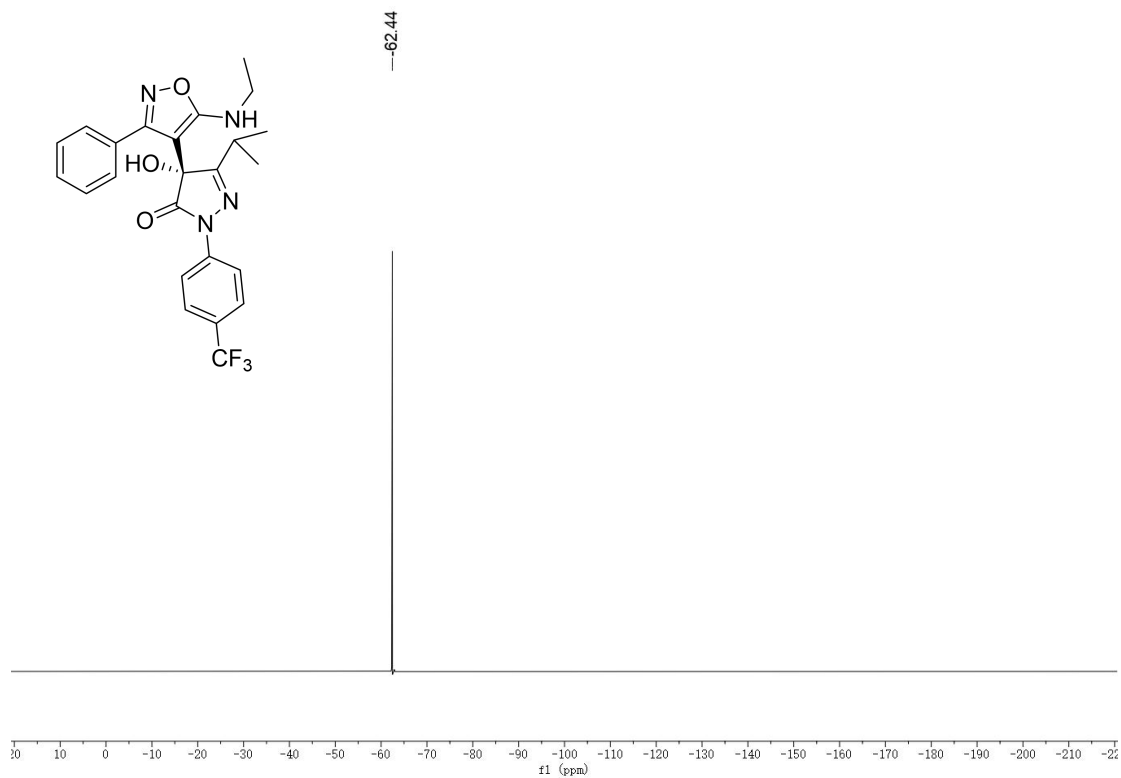

$^1\text{H}$  NMR and  $^{13}\text{C}$  NMR of **3ja**

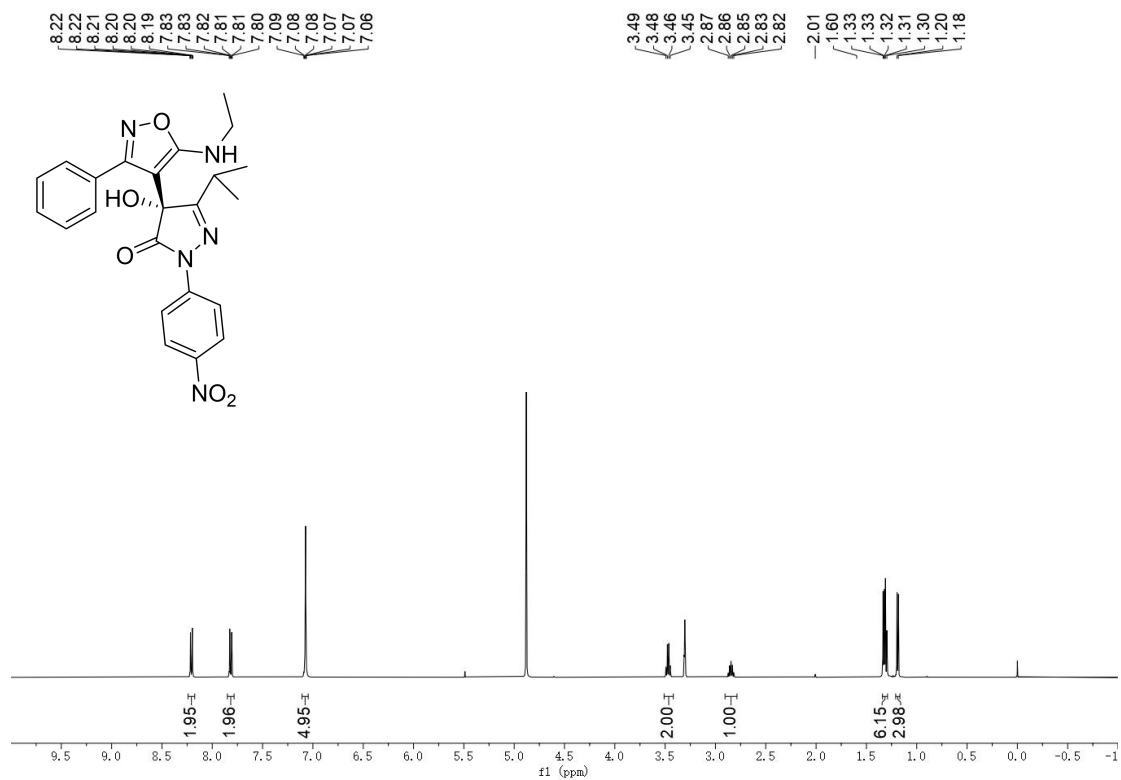



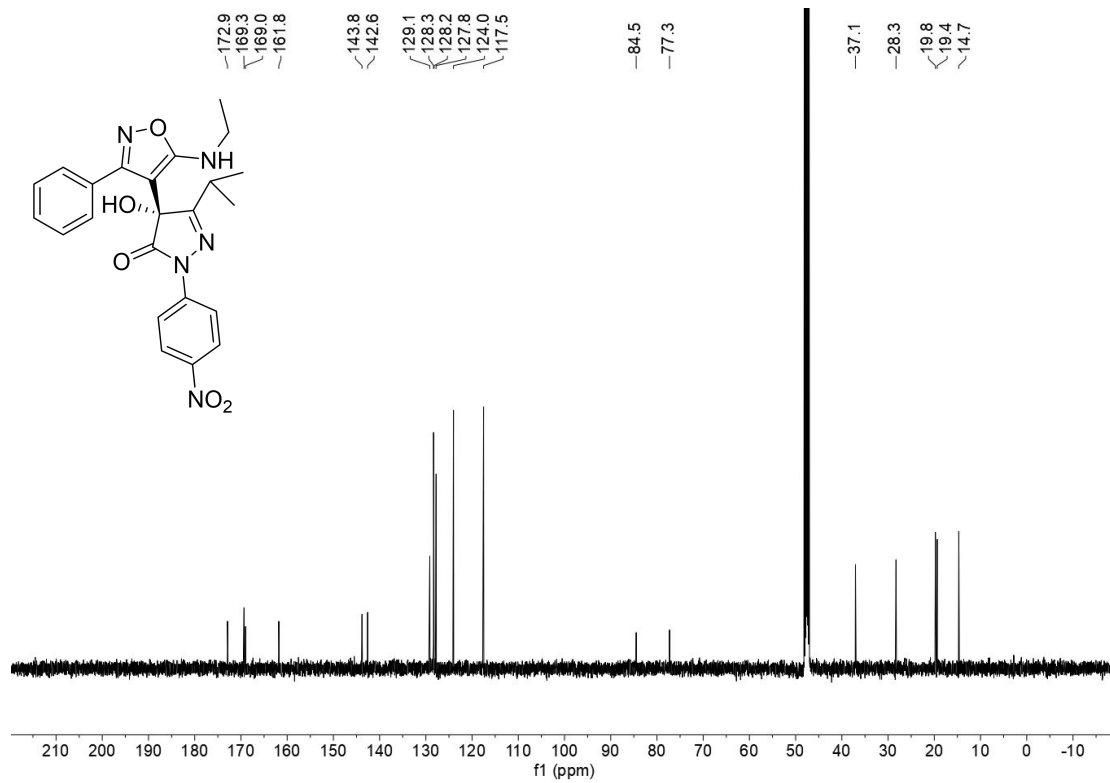

**<sup>1</sup>H NMR and <sup>13</sup>C NMR of 3ka**

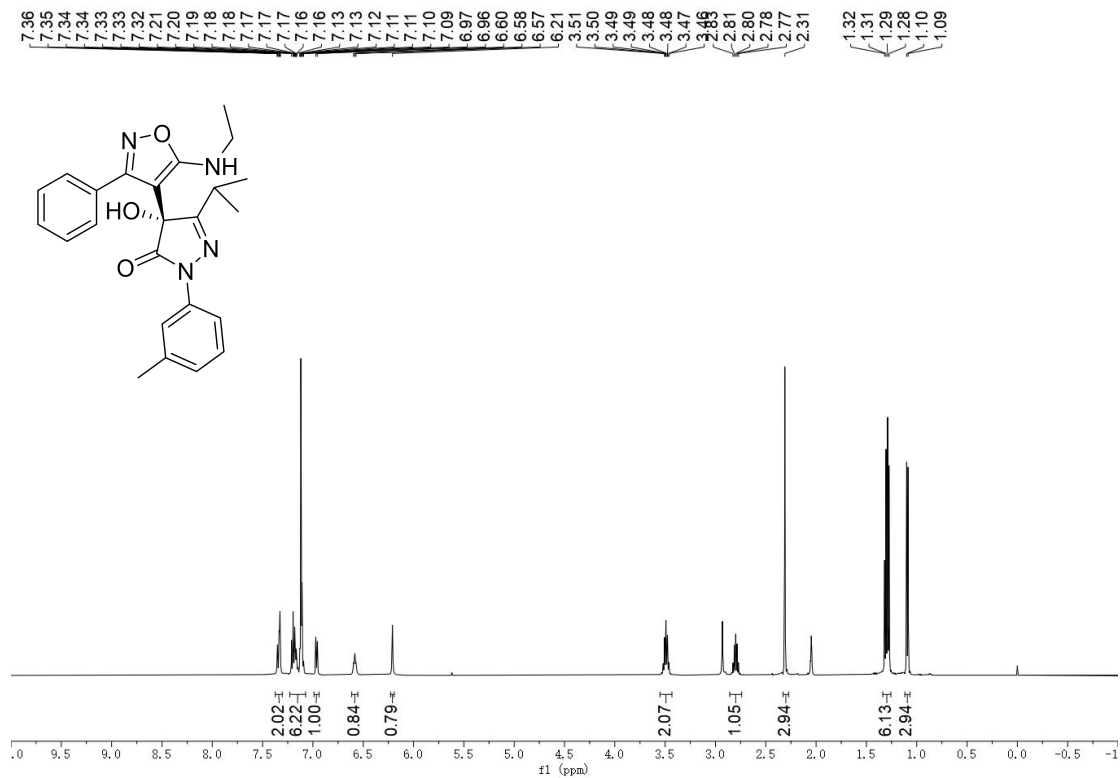

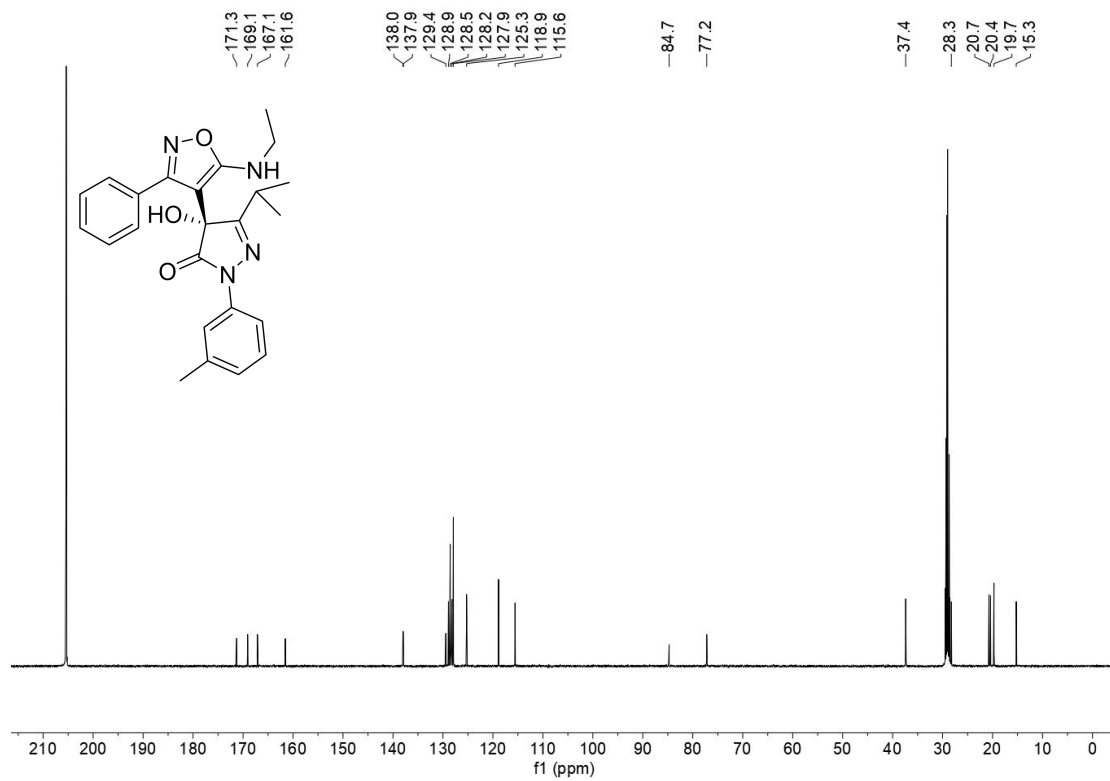

**<sup>1</sup>H NMR and <sup>13</sup>C NMR of 3la**

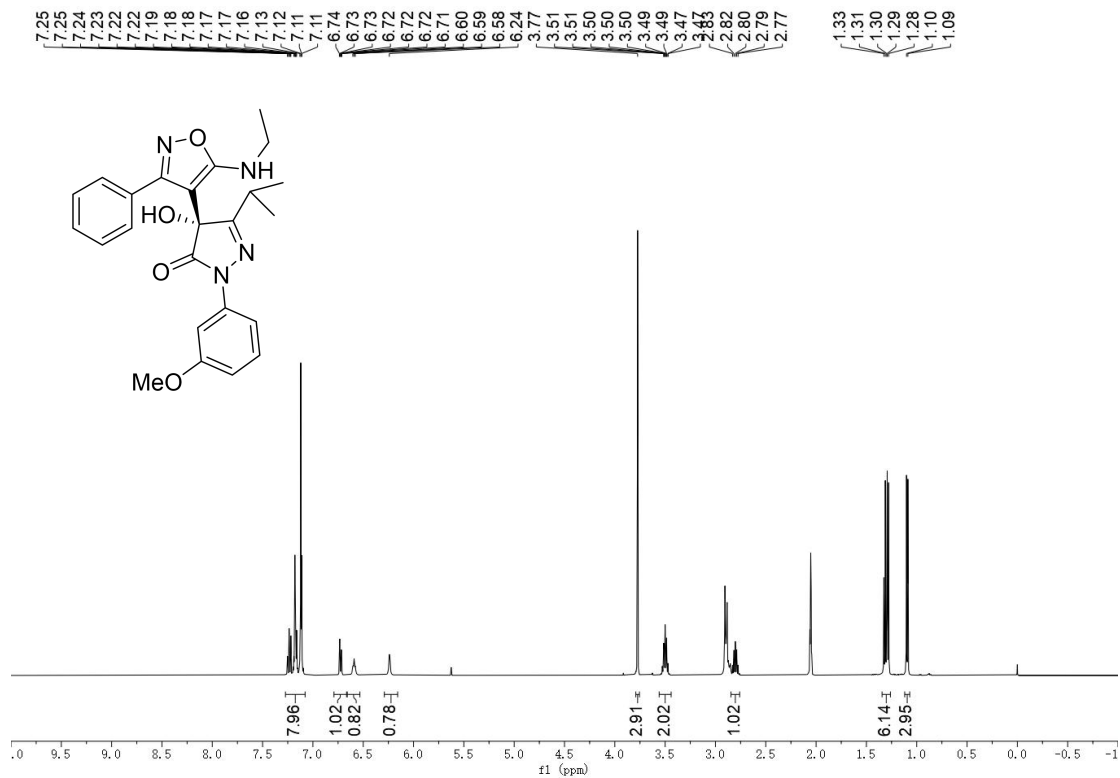

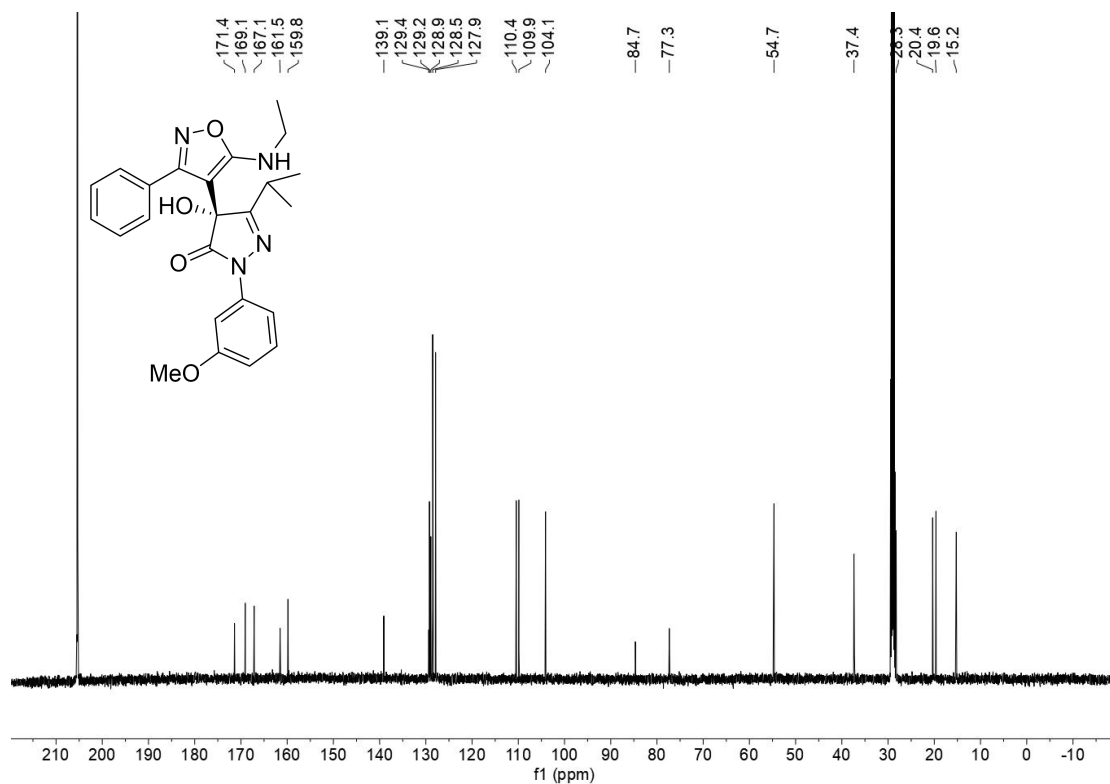

<sup>1</sup>H NMR, <sup>13</sup>C NMR and <sup>19</sup>F NMR of **3ma**

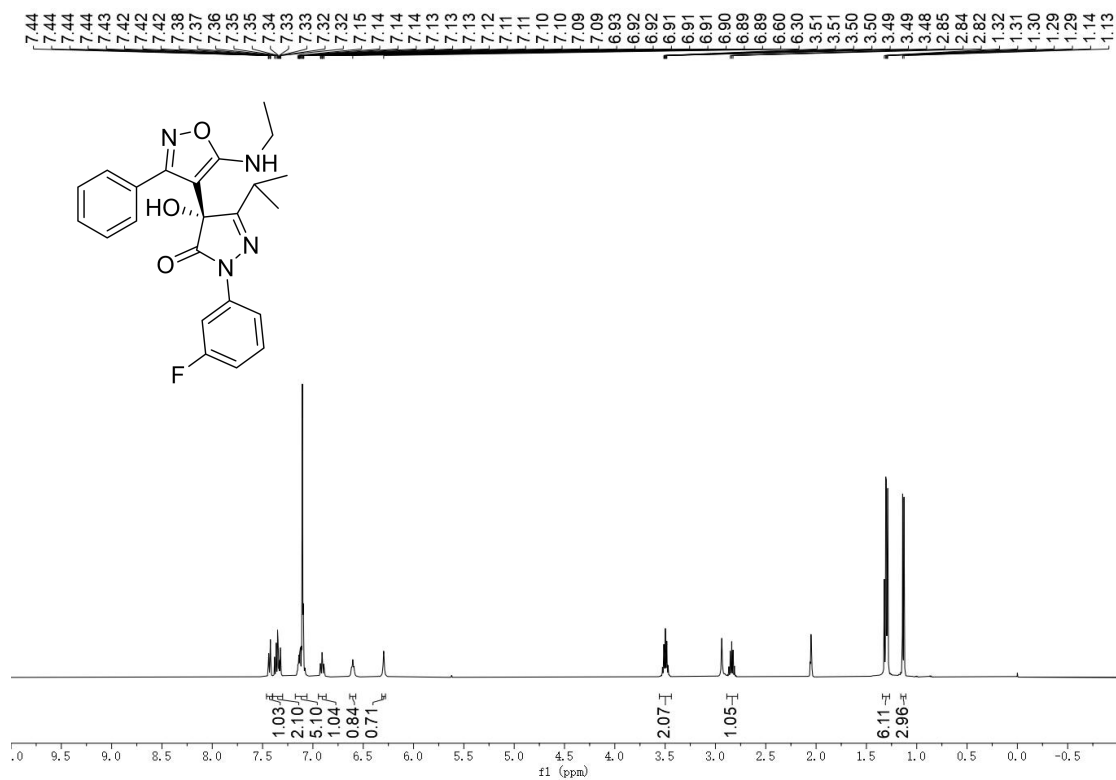

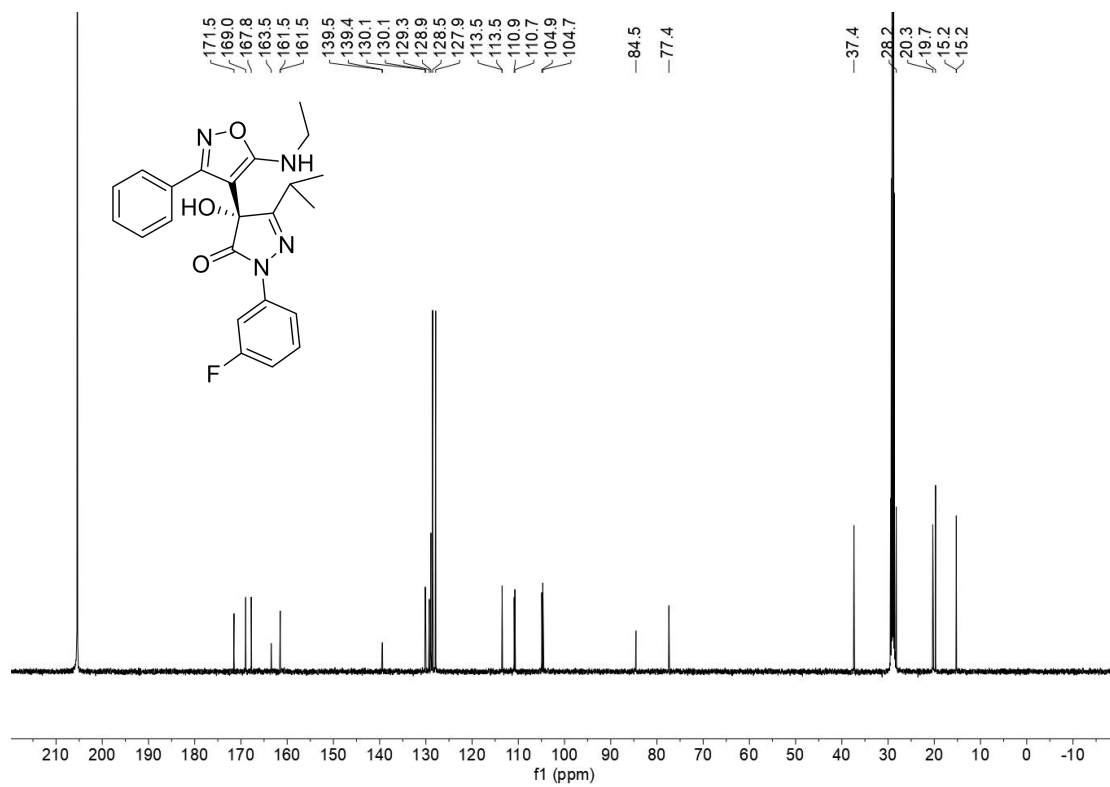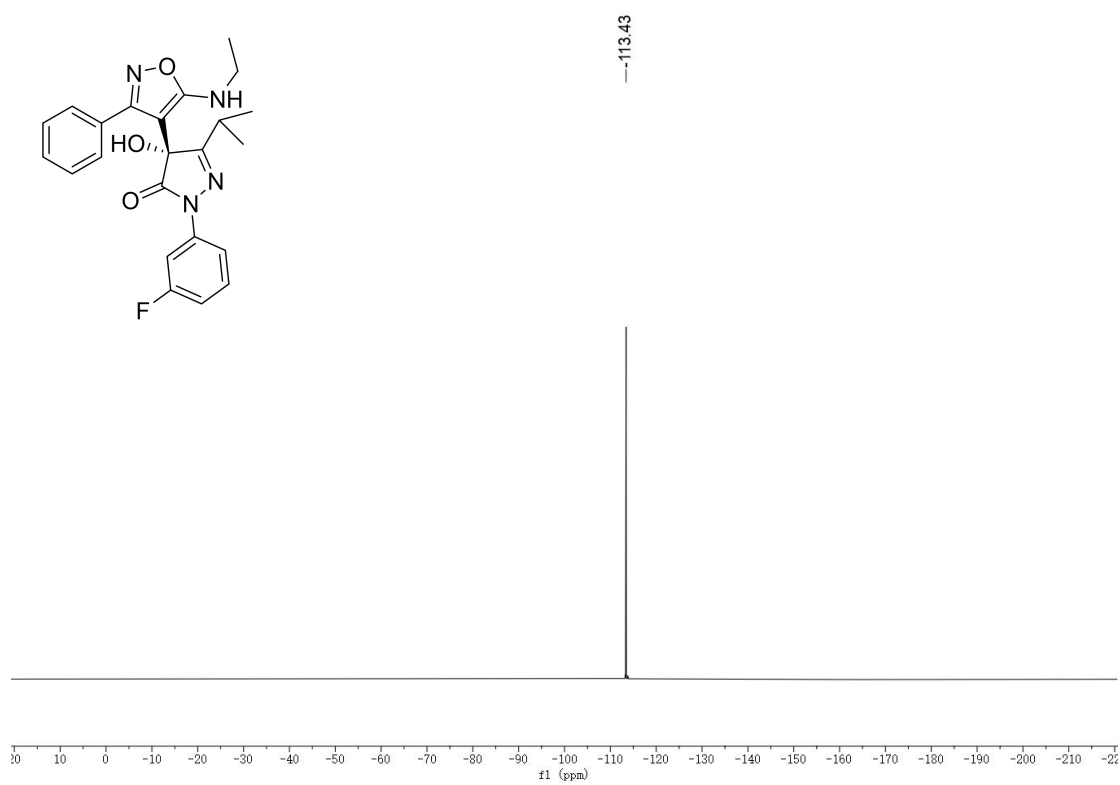

$^1\text{H}$  NMR and  $^{13}\text{C}$  NMR of **3na**

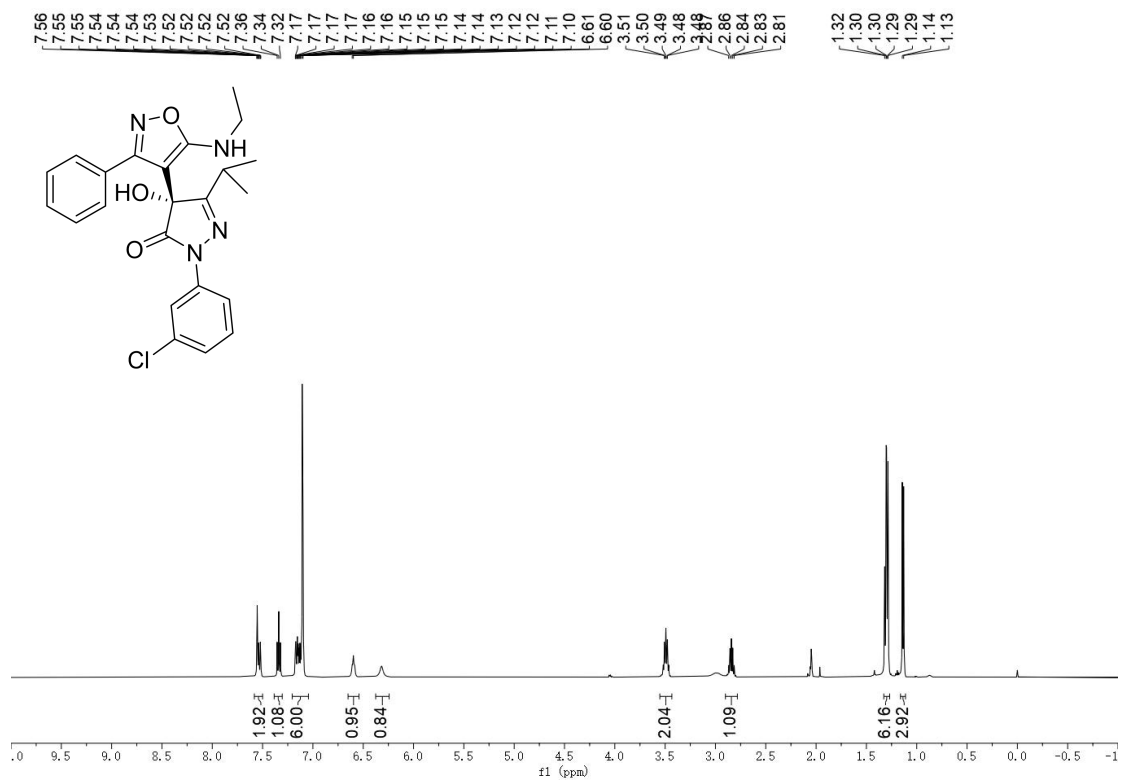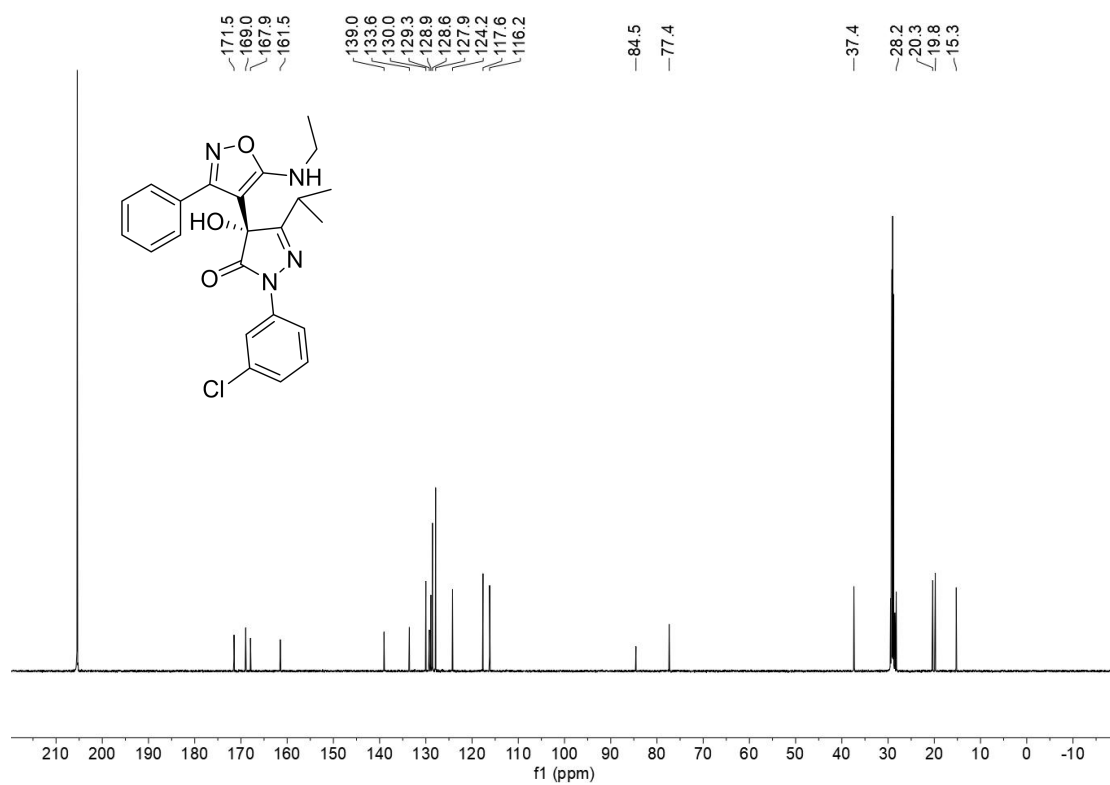

<sup>1</sup>H NMR and <sup>13</sup>C NMR of 30a

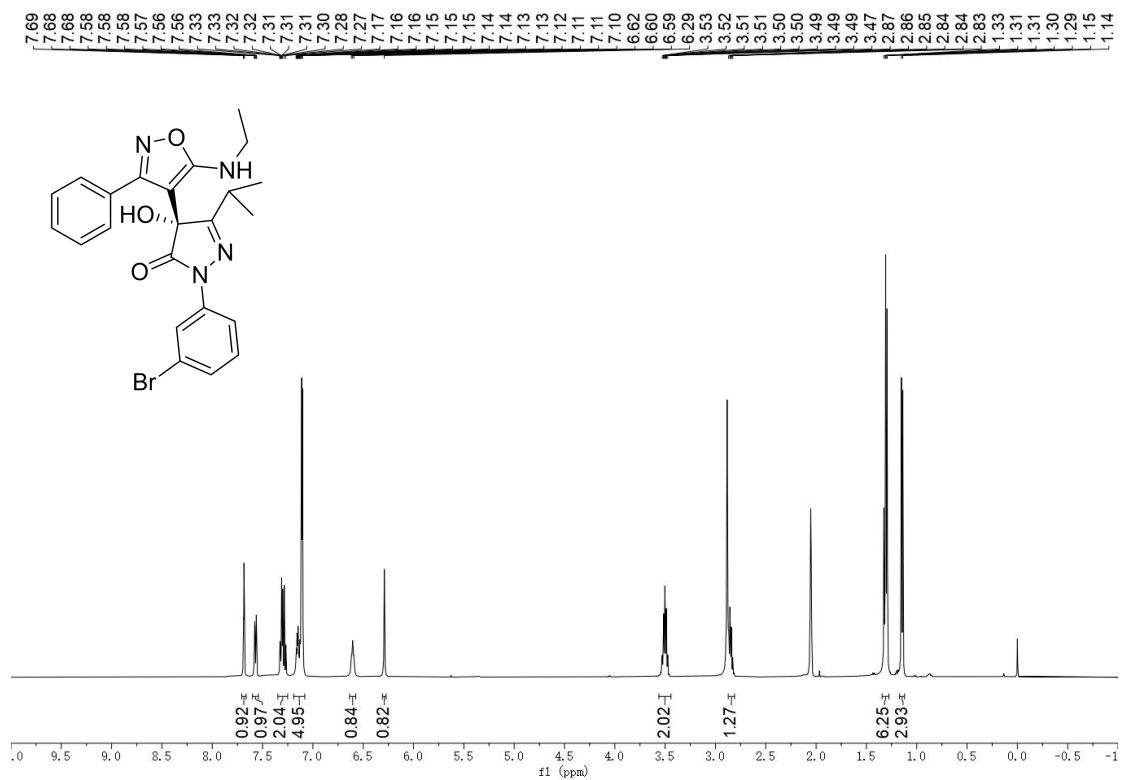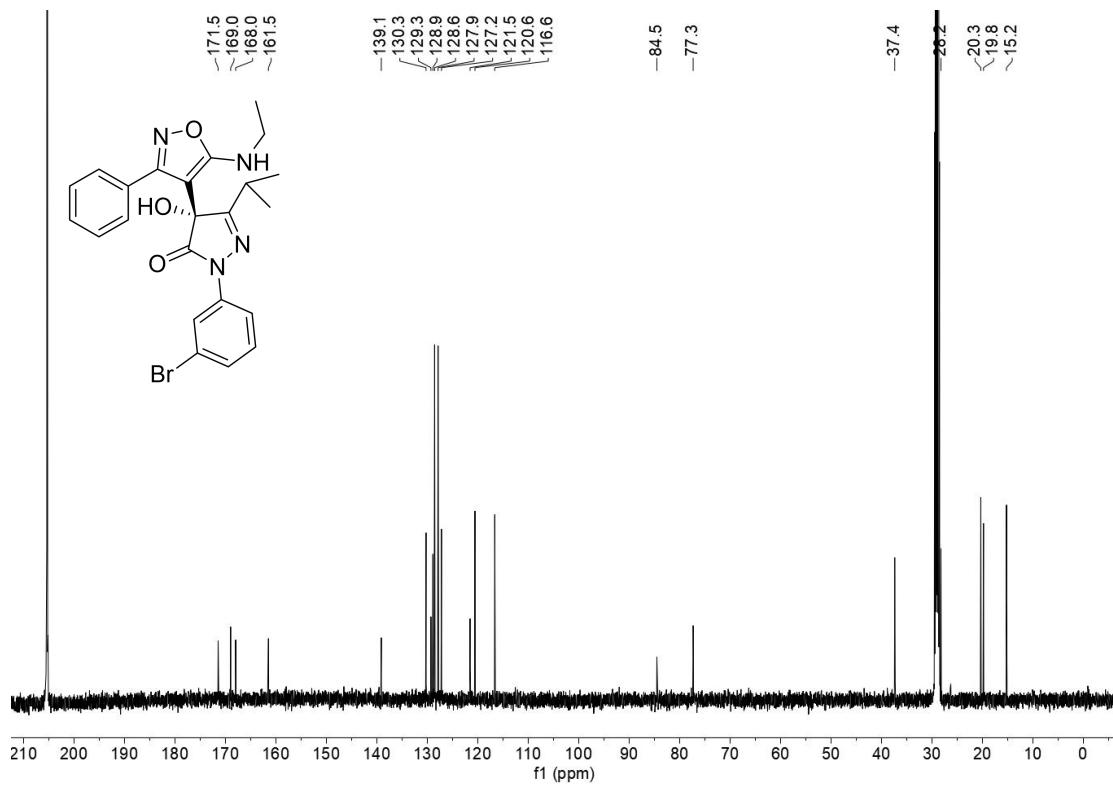

**<sup>1</sup>H NMR, <sup>13</sup>C NMR and <sup>19</sup>F NMR of 3pa**

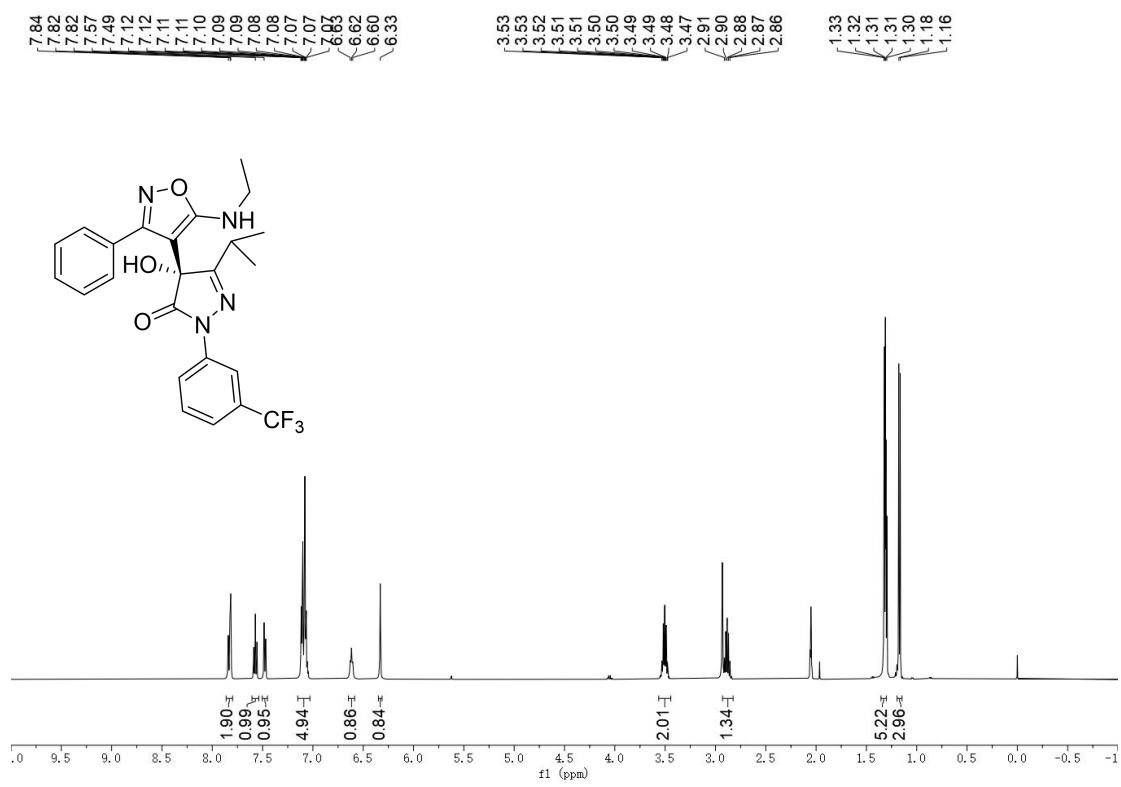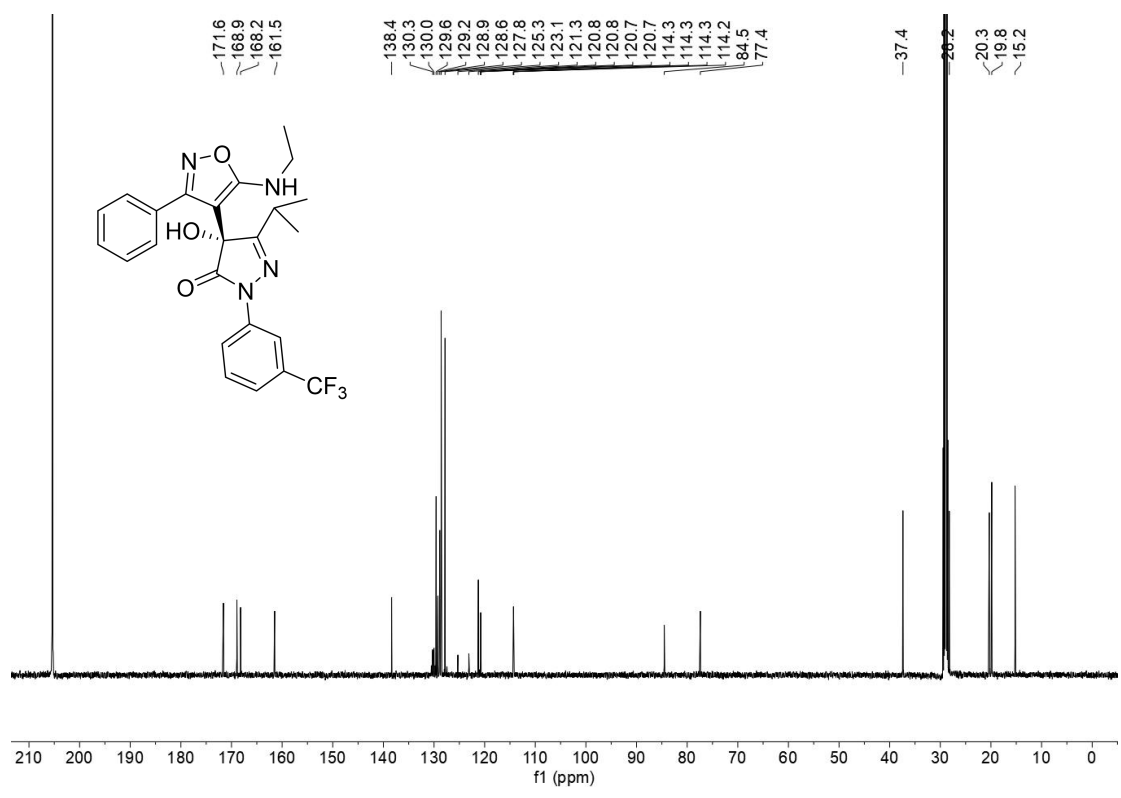

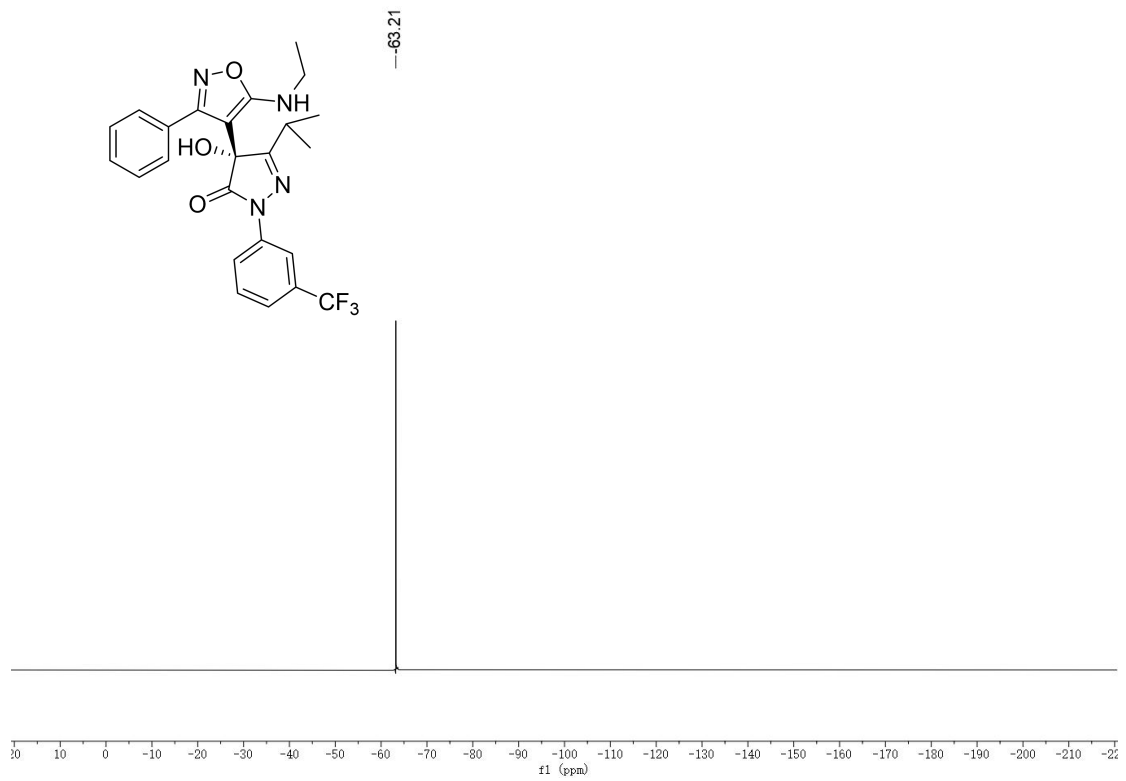

$^1\text{H}$  NMR and  $^{13}\text{C}$  NMR of **3qa**

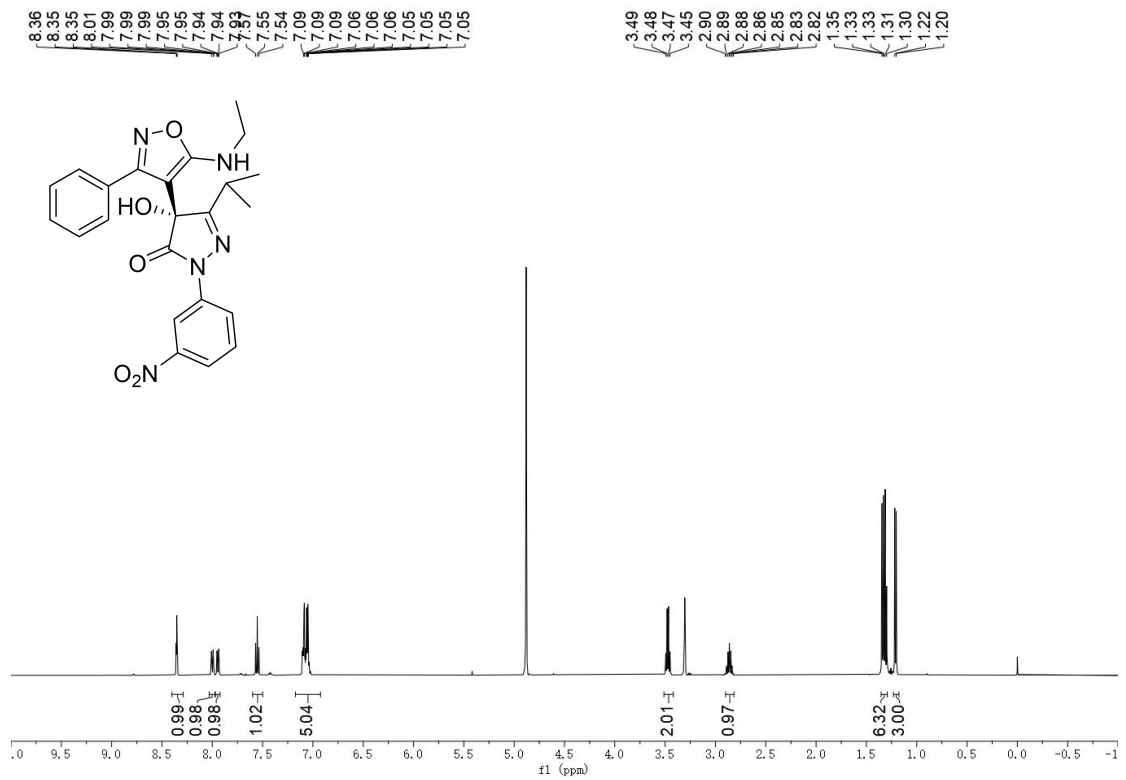



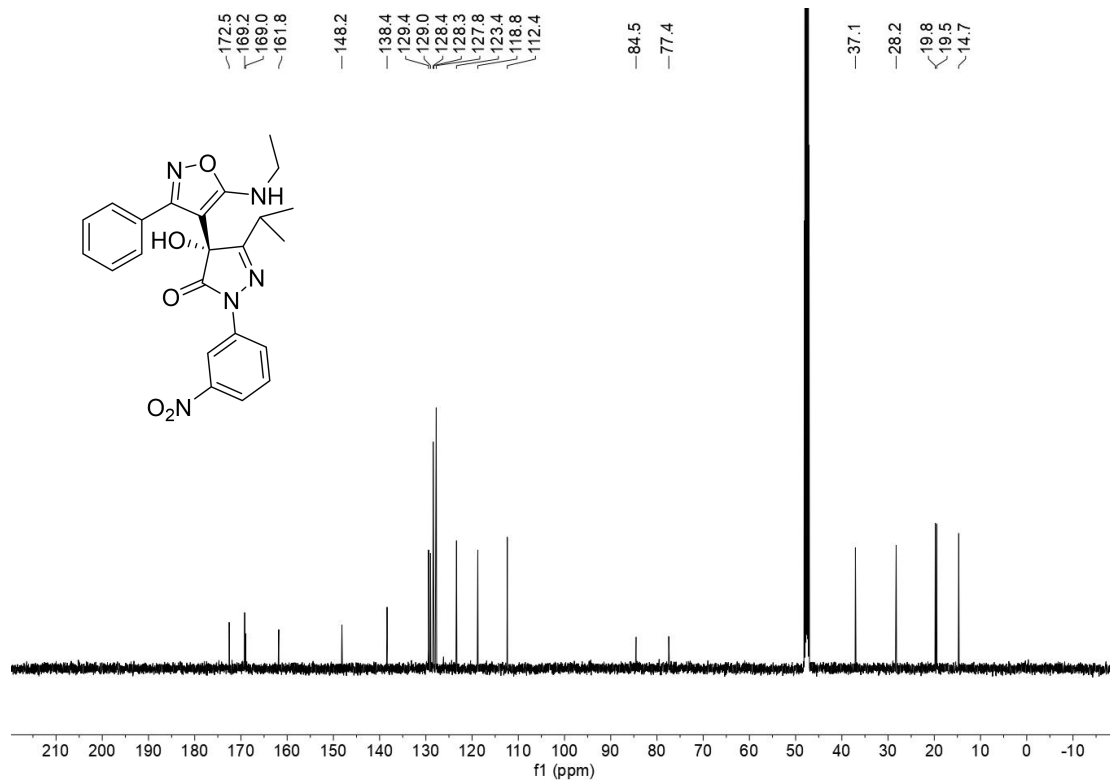

<sup>1</sup>H NMR, <sup>13</sup>C NMR and <sup>19</sup>F NMR of **3ra**

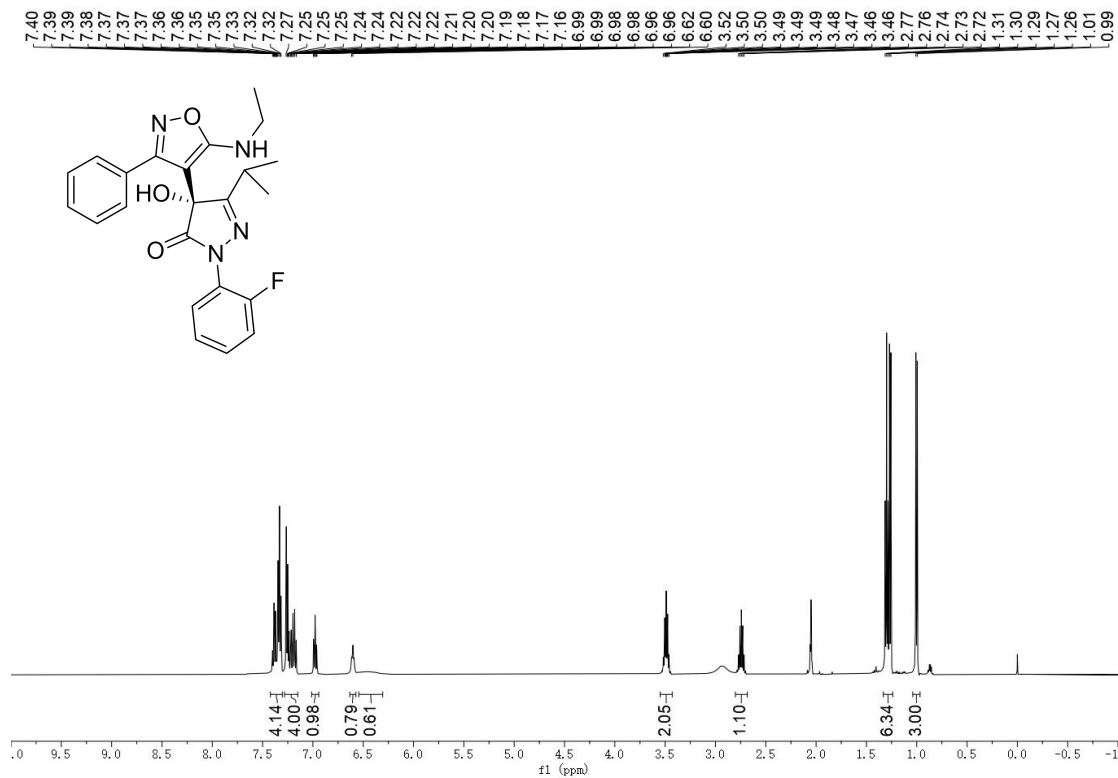

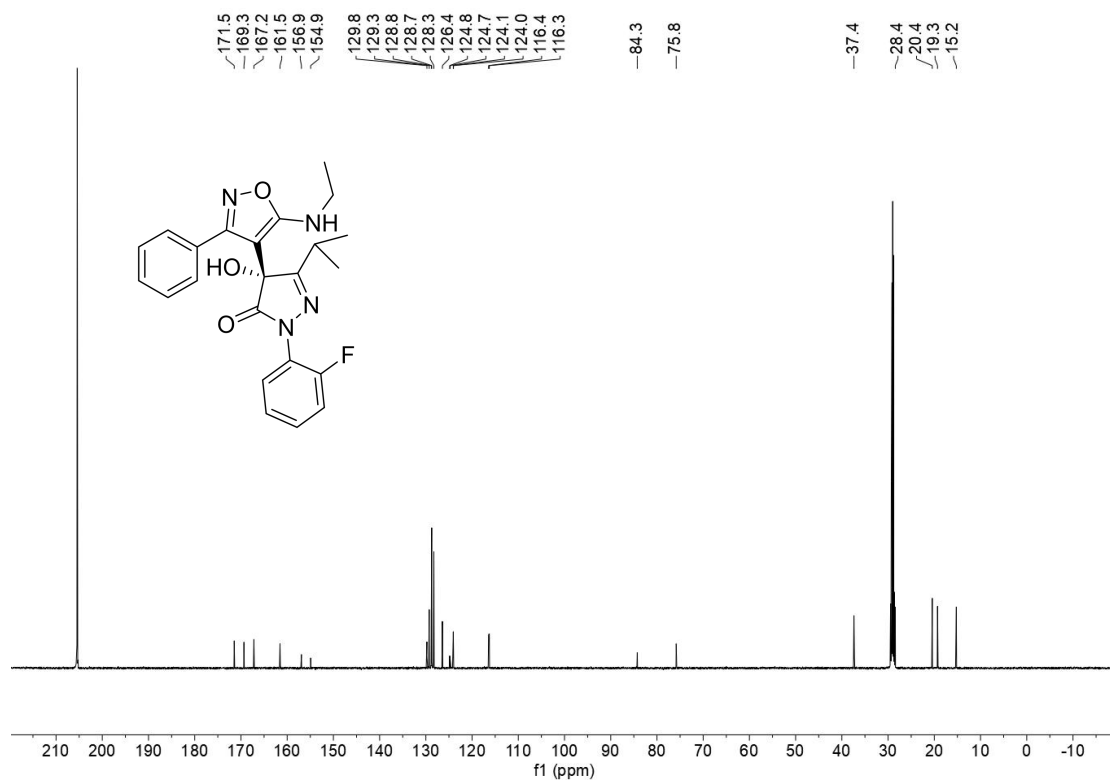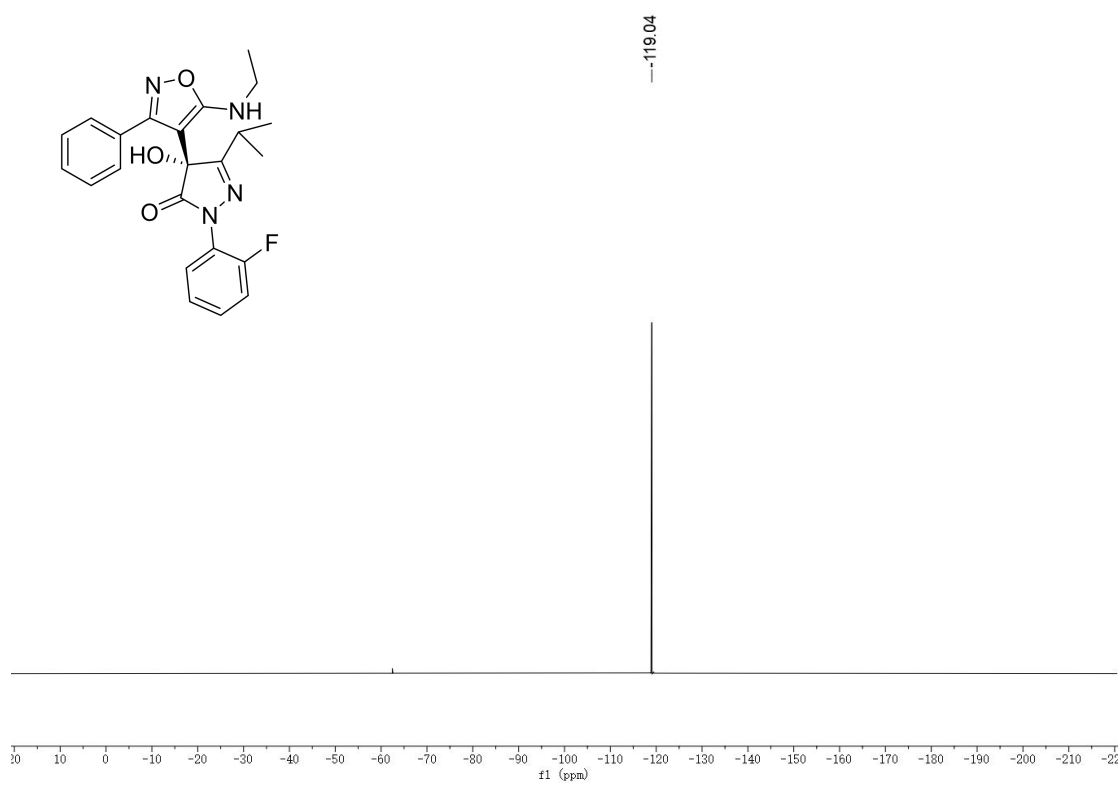

$^1\text{H}$  NMR and  $^{13}\text{C}$  NMR of **3sa**

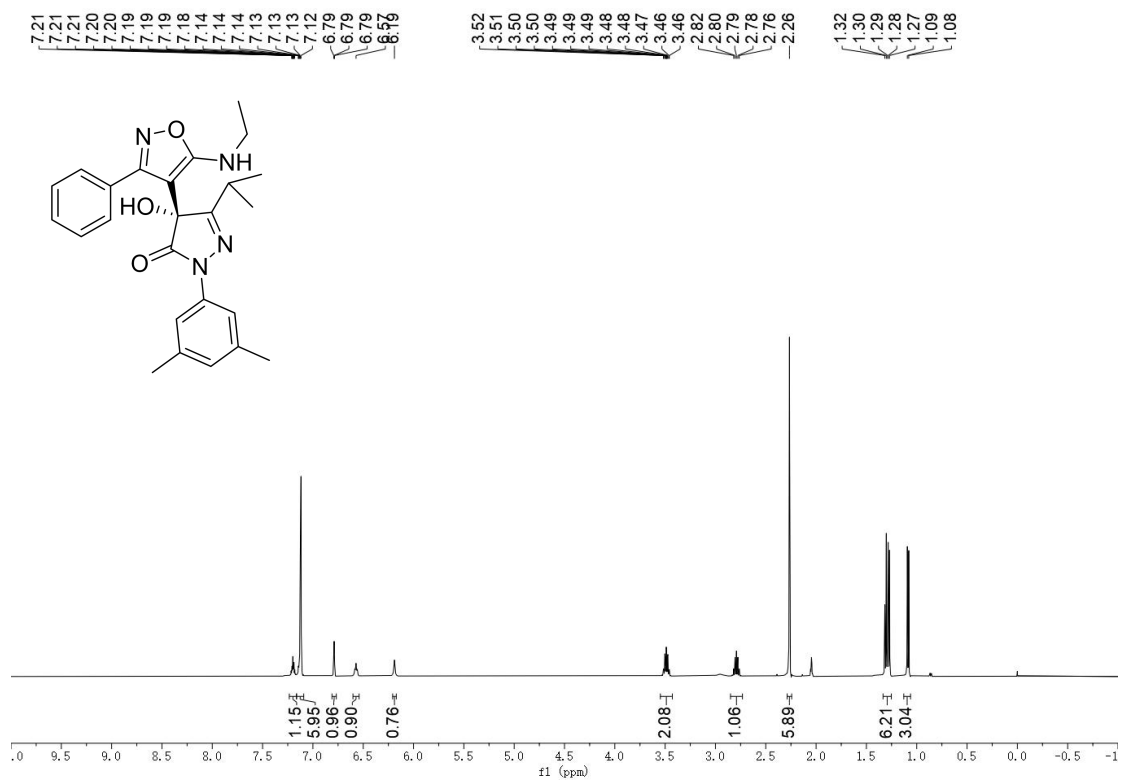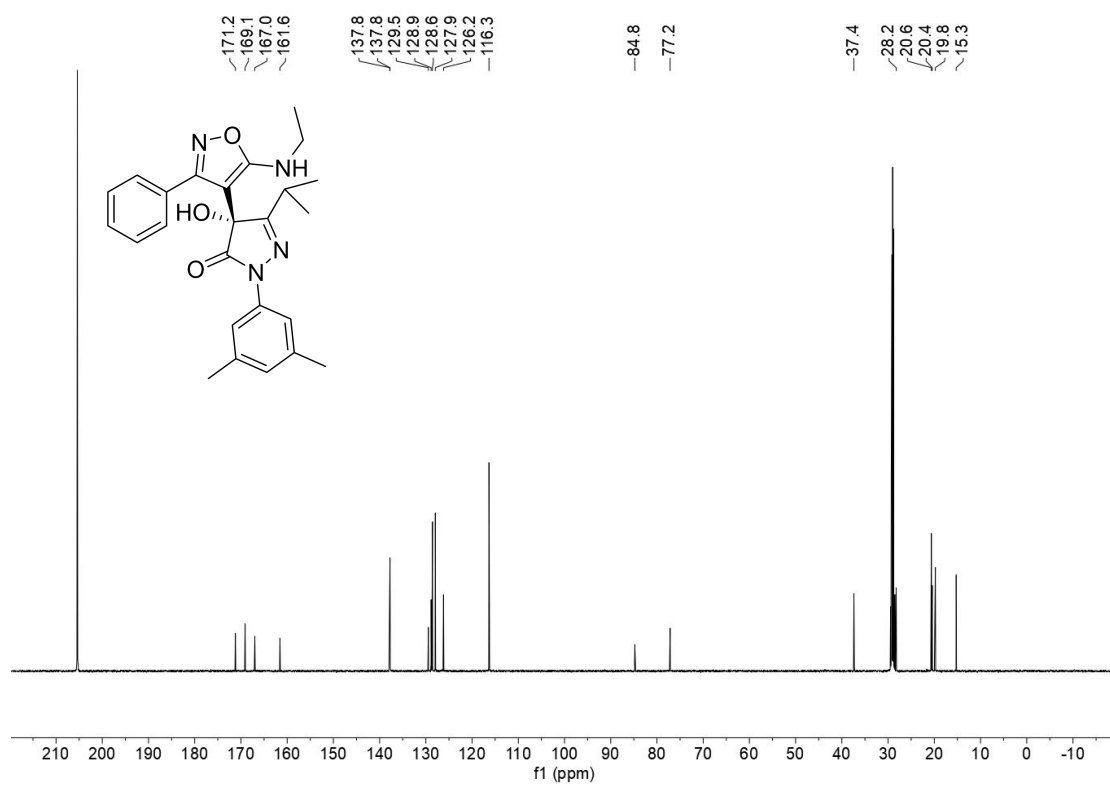

<sup>1</sup>H NMR and <sup>13</sup>C NMR of **3ta**

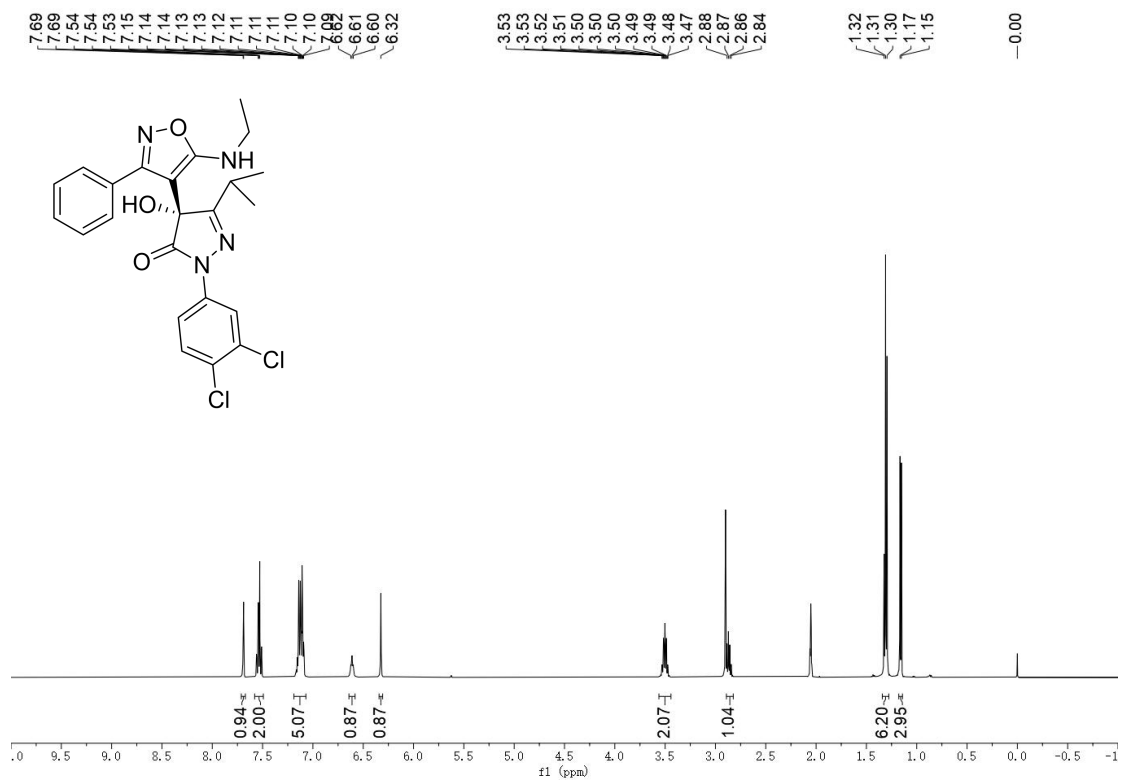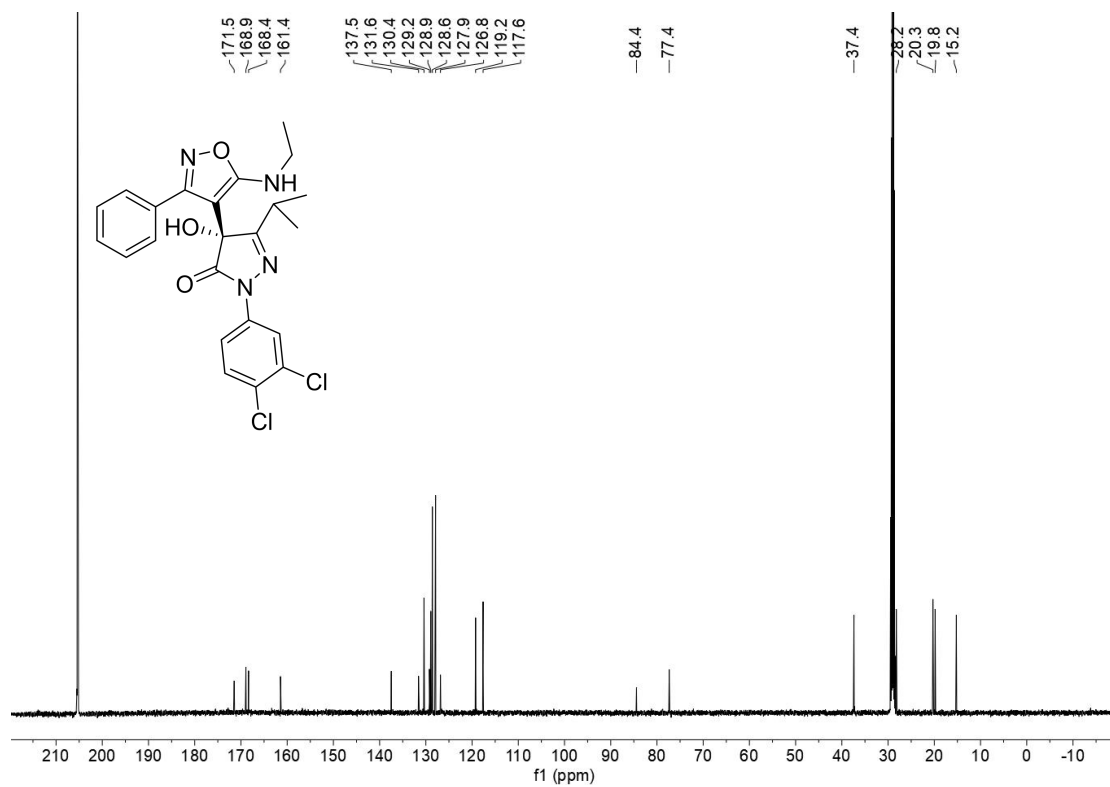

<sup>1</sup>H NMR and <sup>13</sup>C NMR of **3ua**

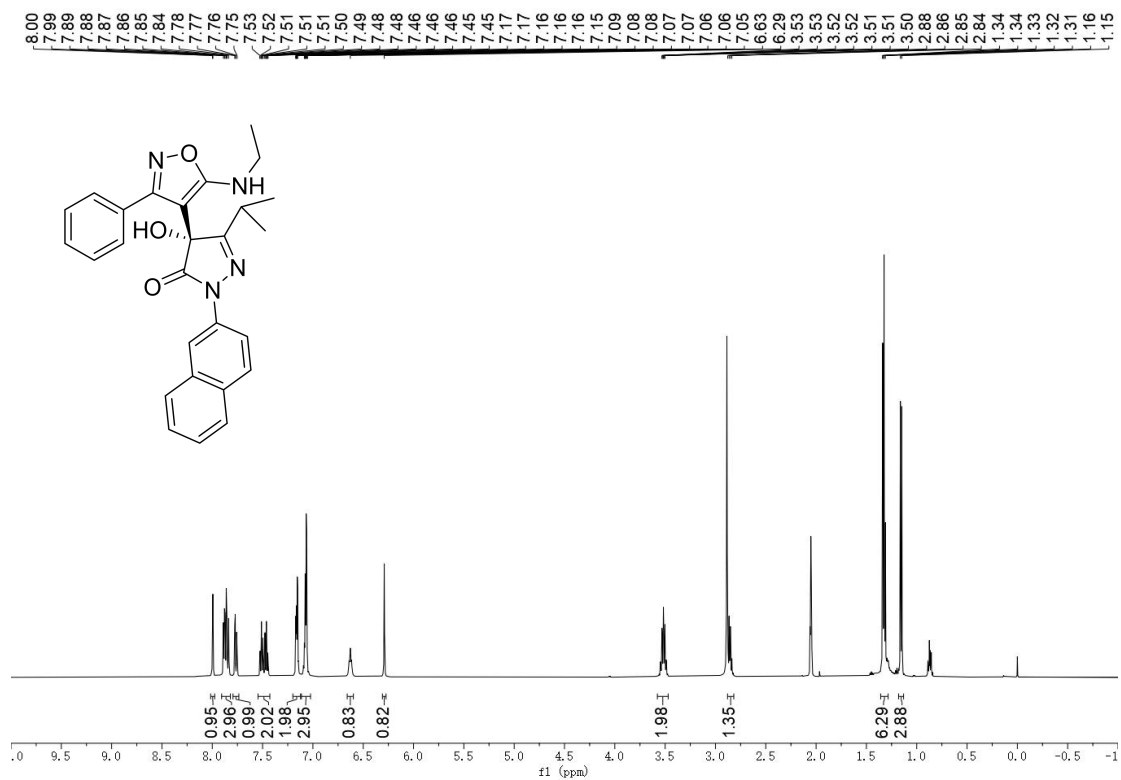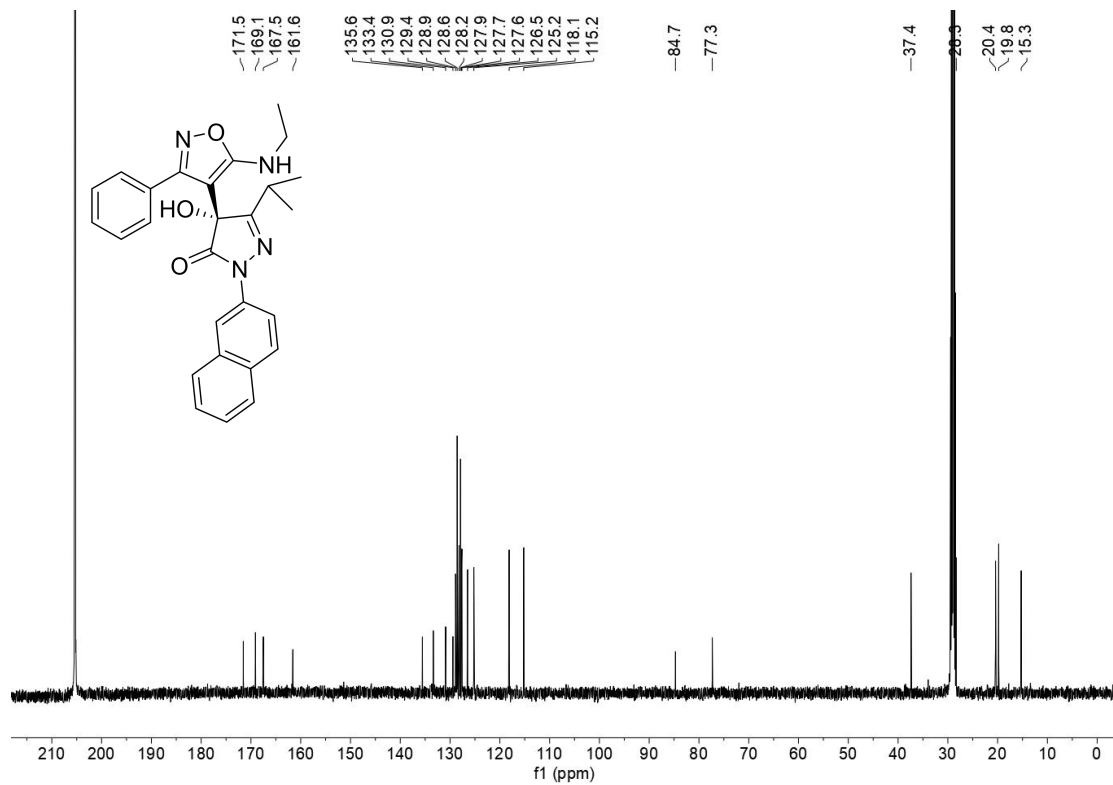

<sup>1</sup>H NMR and <sup>13</sup>C NMR of 3va

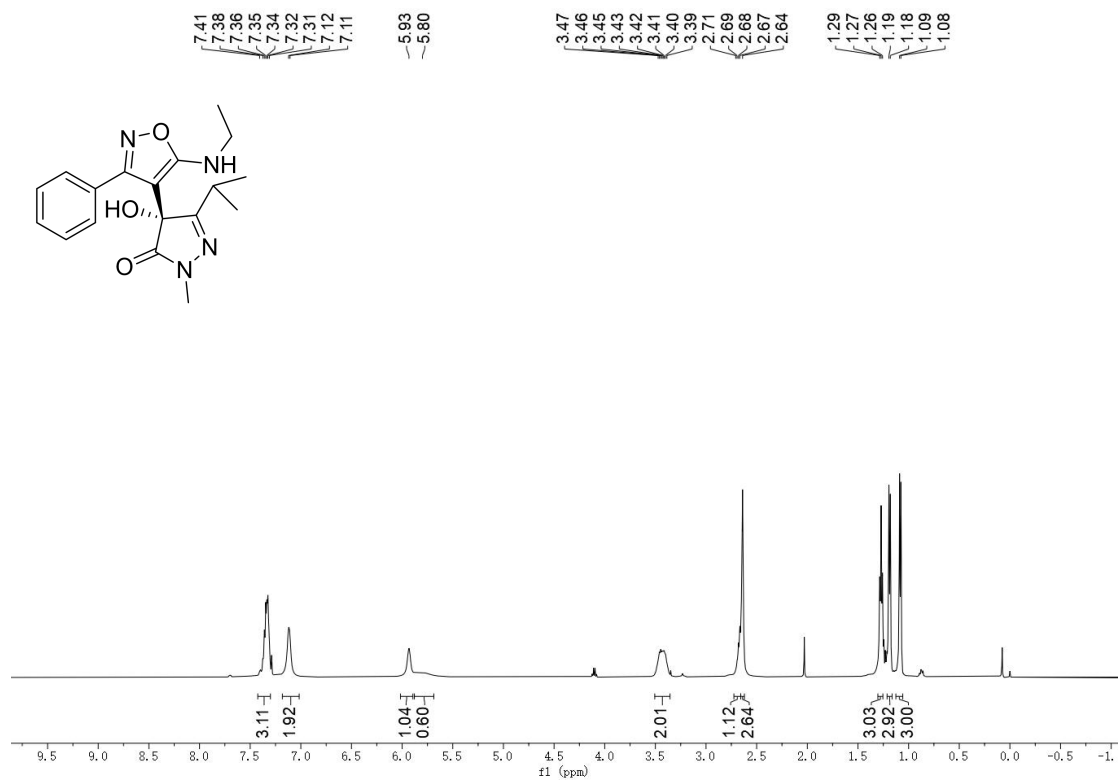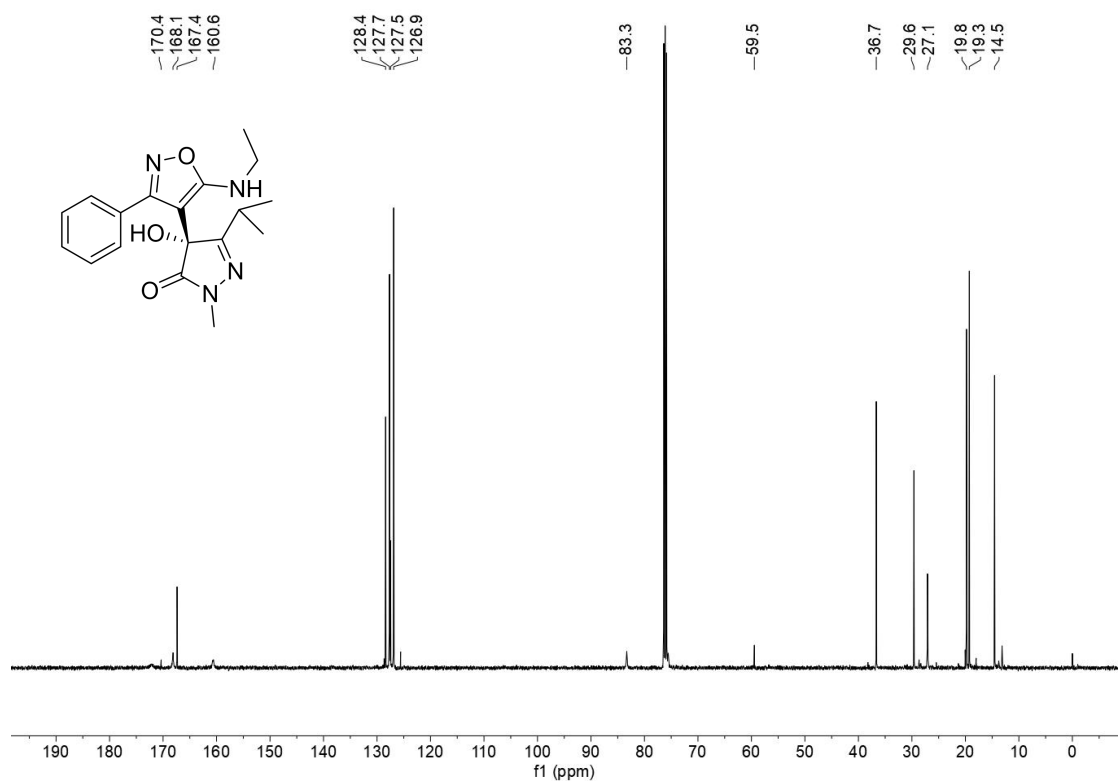

$^1\text{H}$  NMR and  $^{13}\text{C}$  NMR of **3ab**

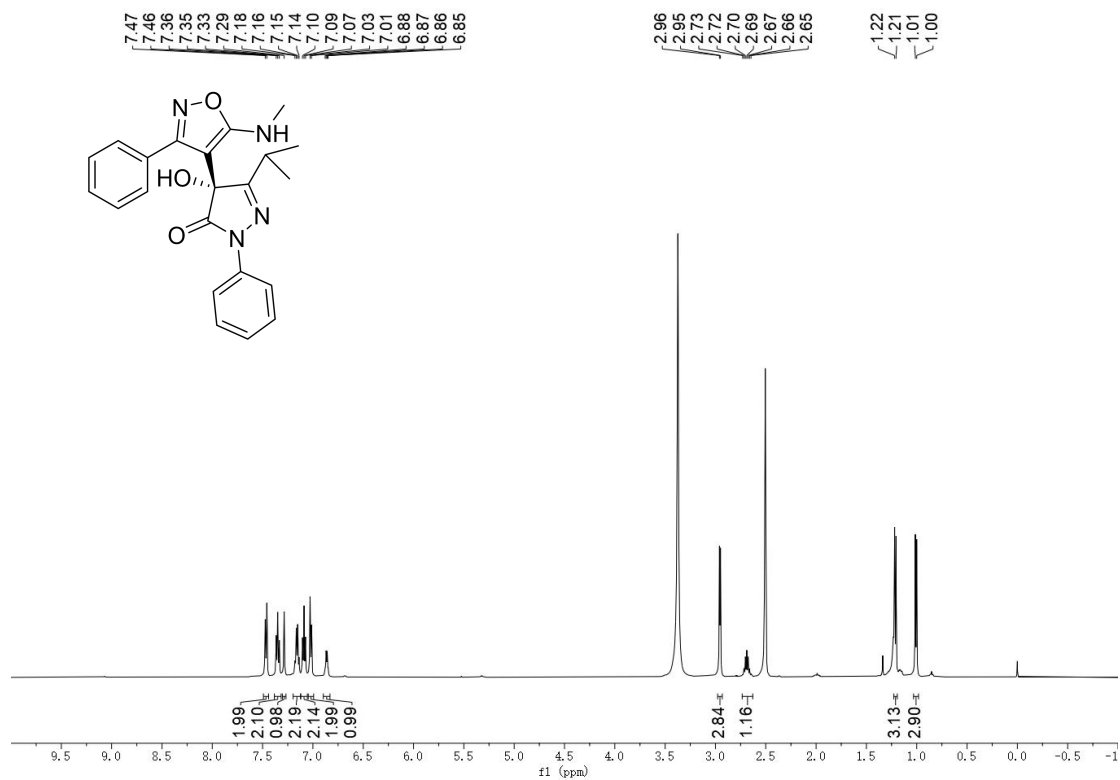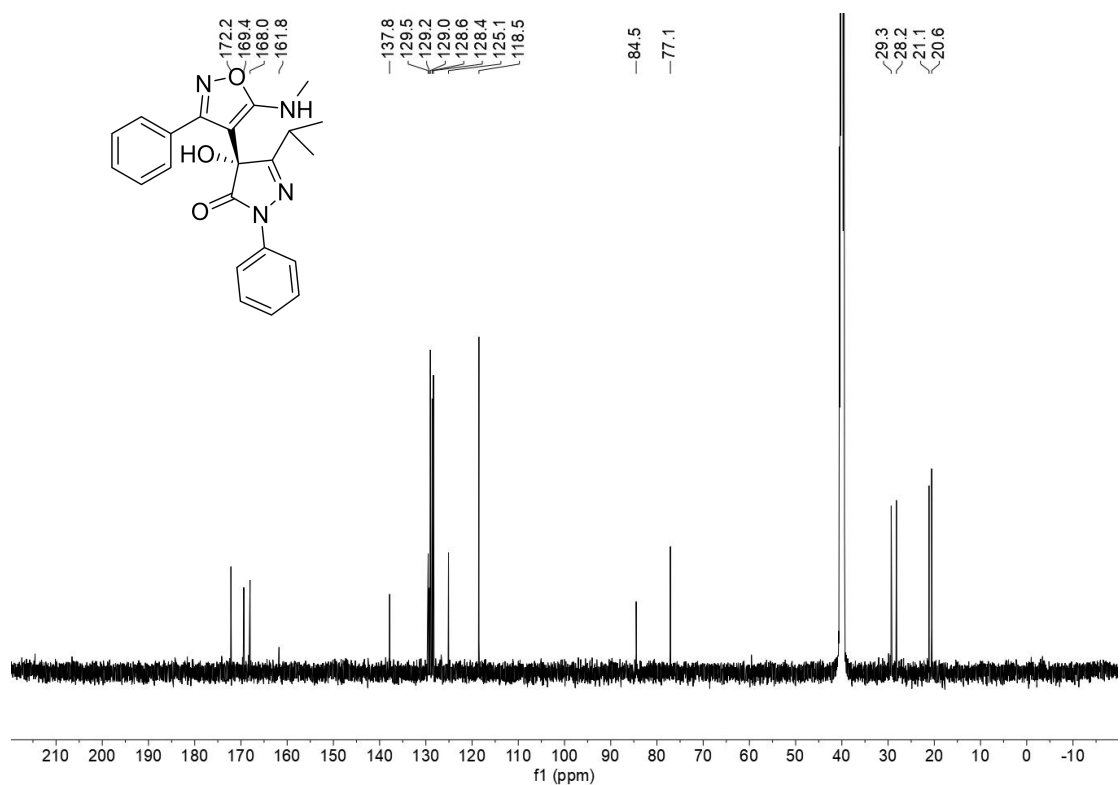

$^1\text{H}$  NMR and  $^{13}\text{C}$  NMR of **3ac**

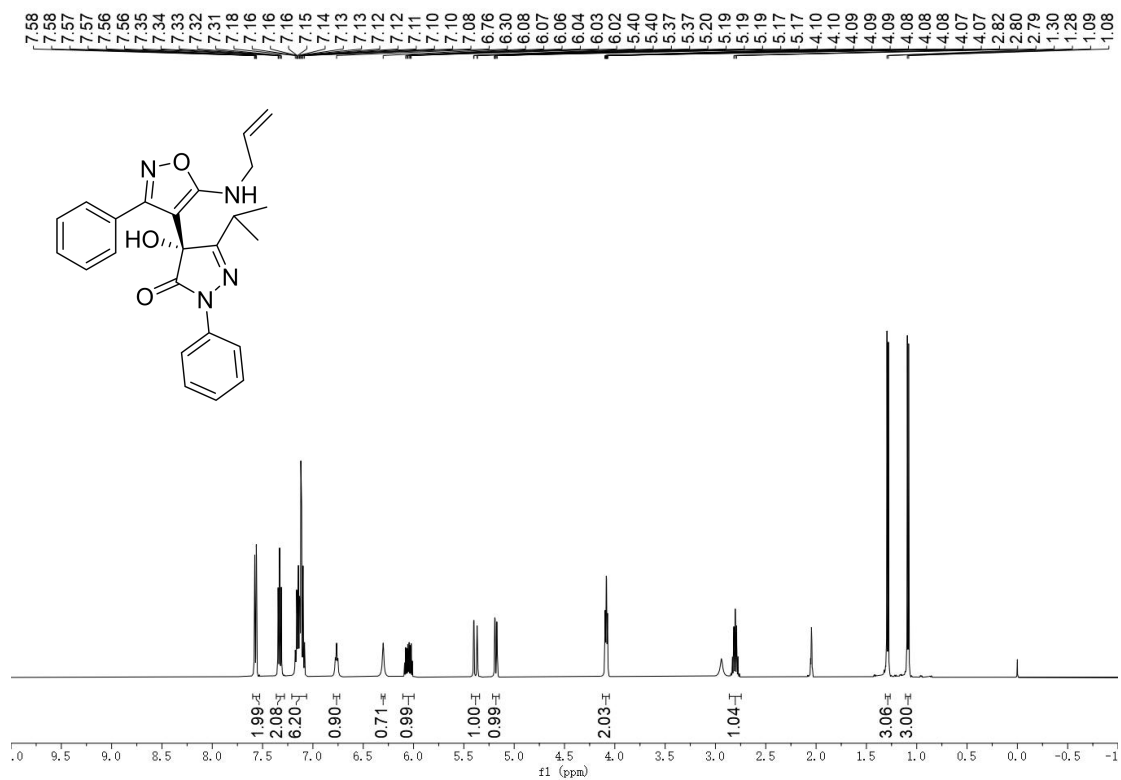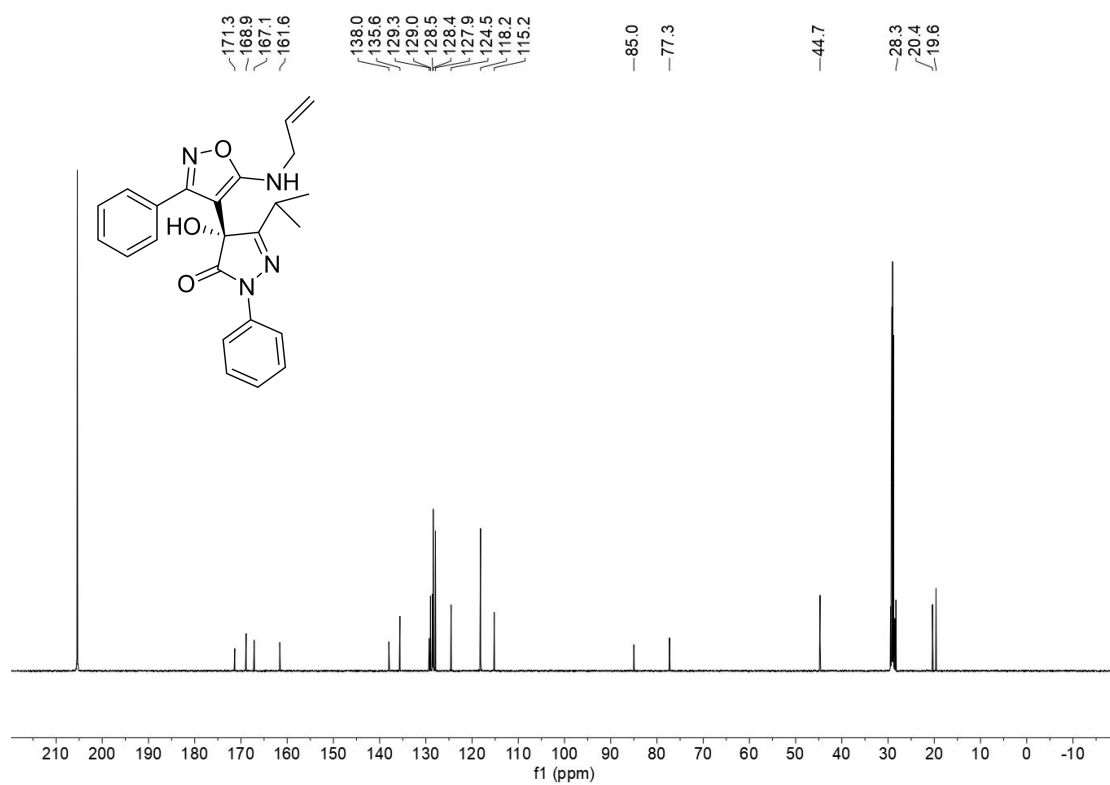

$^1\text{H}$  NMR and  $^{13}\text{C}$  NMR of **3ad**



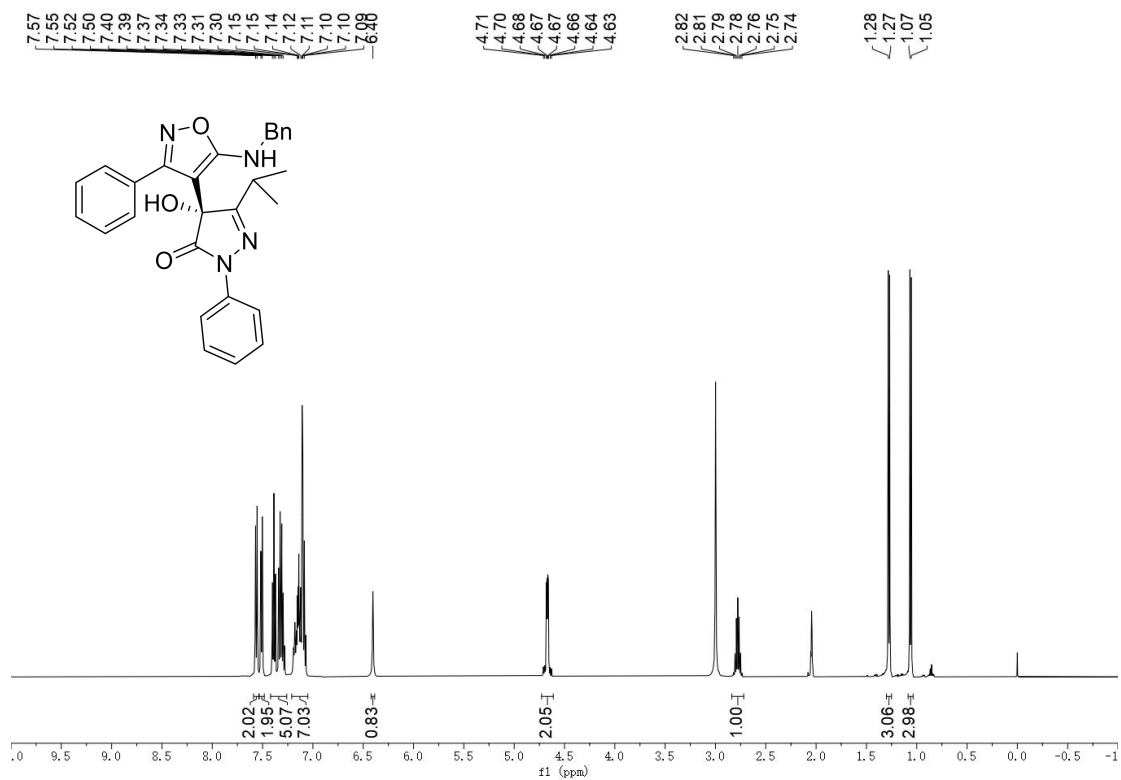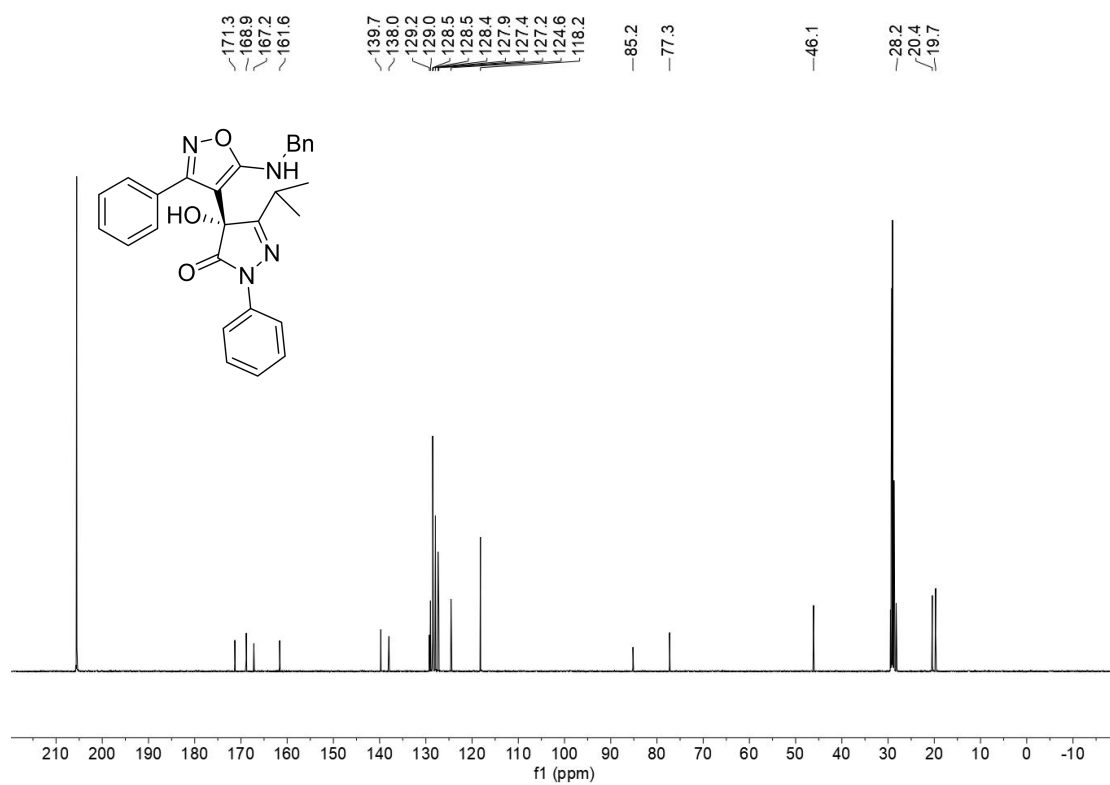

<sup>1</sup>H NMR and <sup>13</sup>C NMR of **3ae**

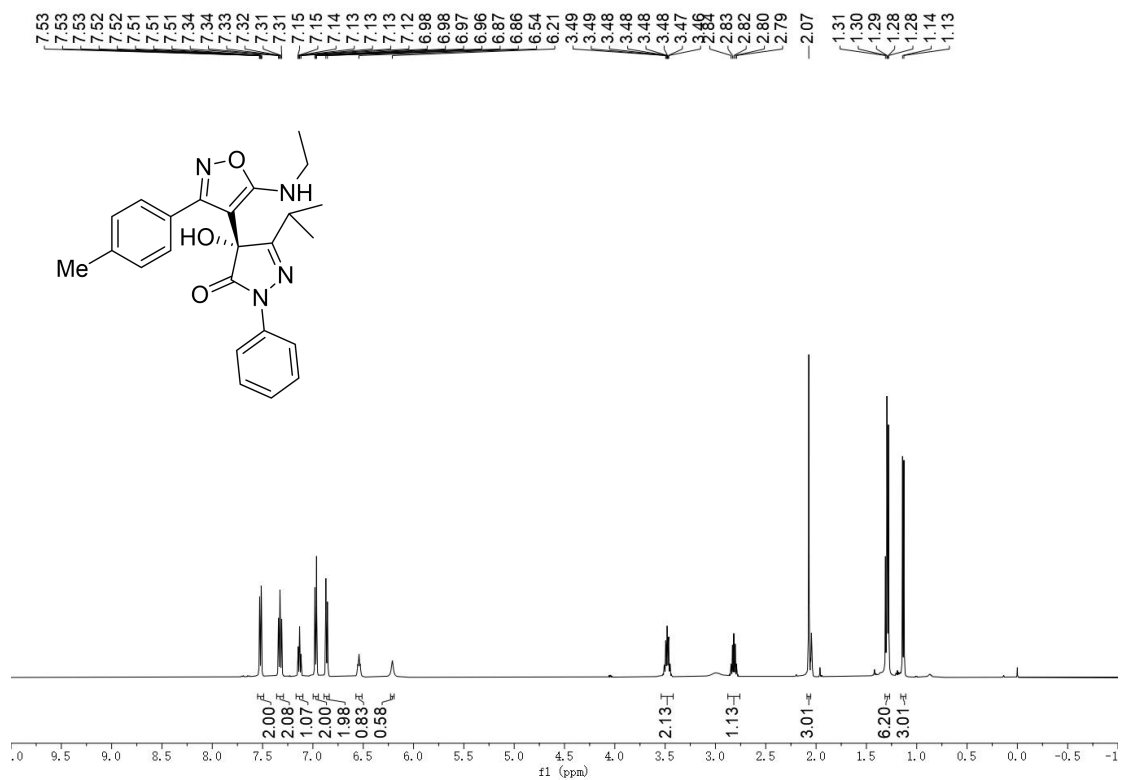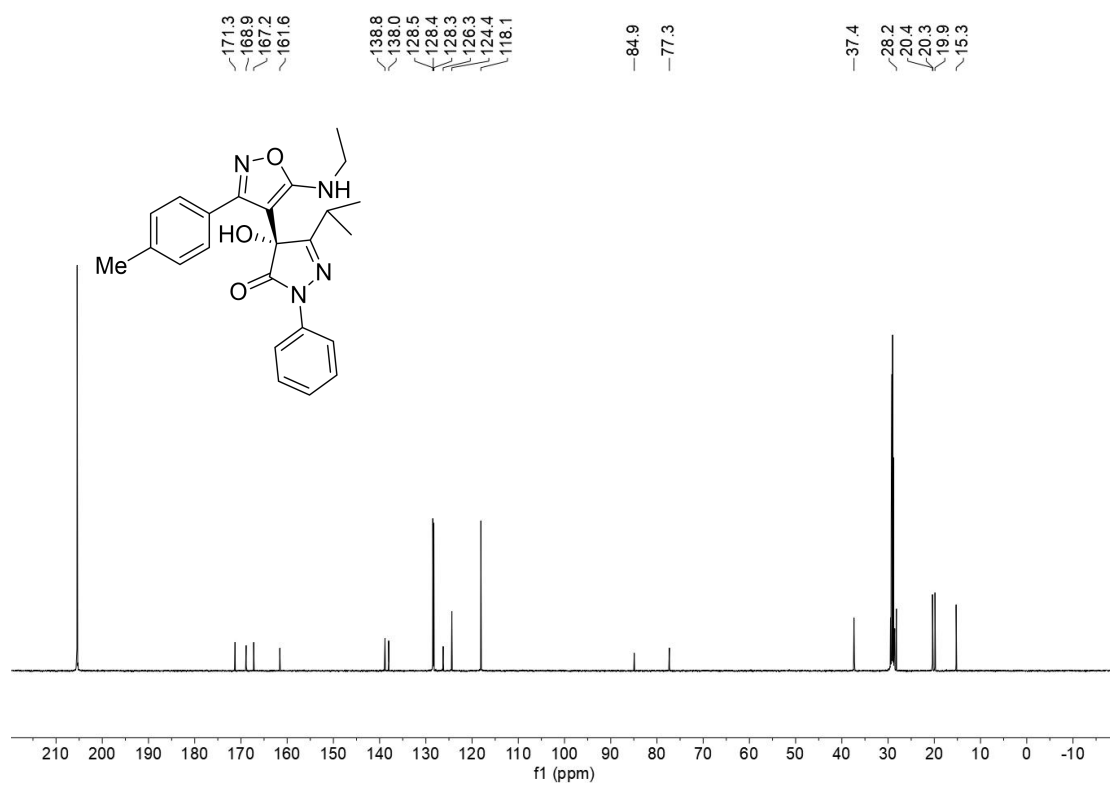

<sup>1</sup>H NMR and <sup>13</sup>C NMR of 3af

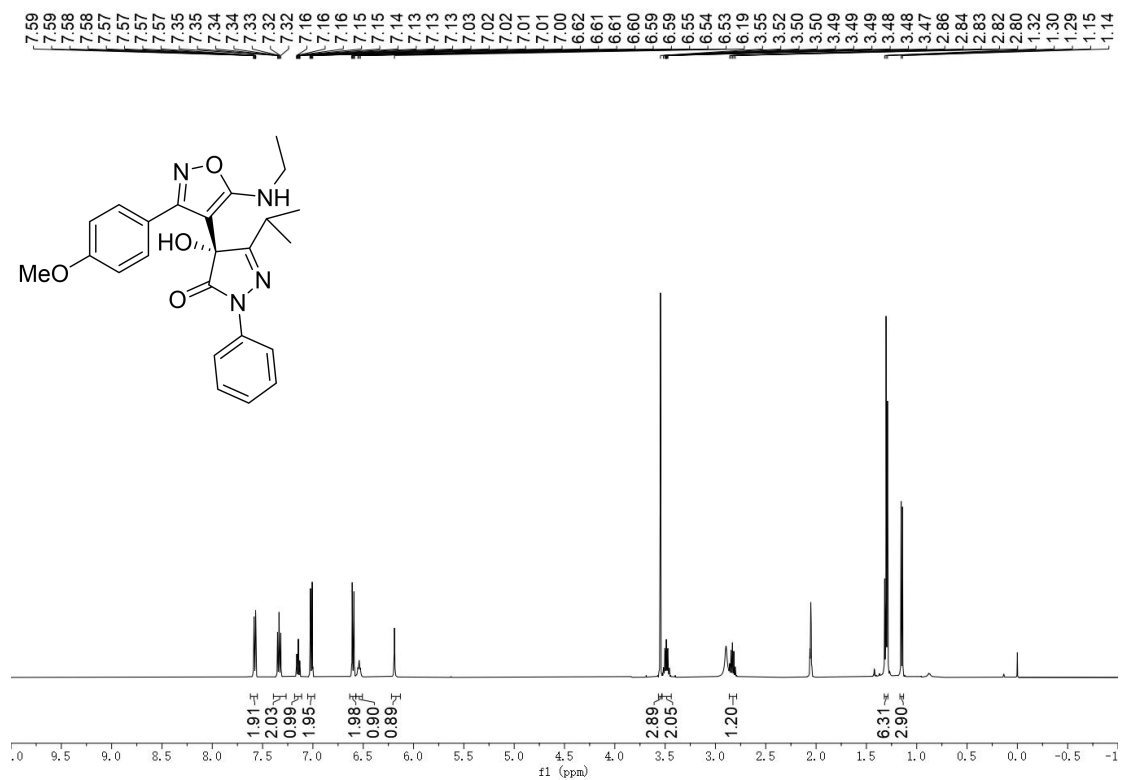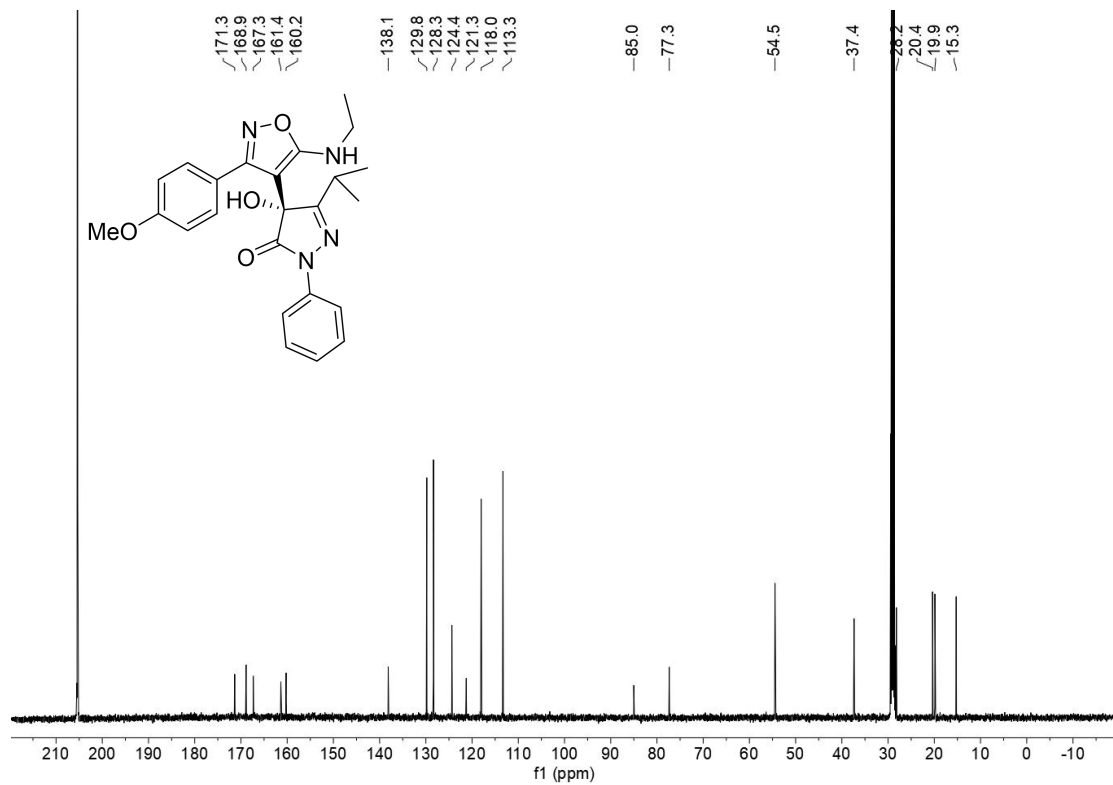

<sup>1</sup>H NMR and <sup>13</sup>C NMR of **3ag**

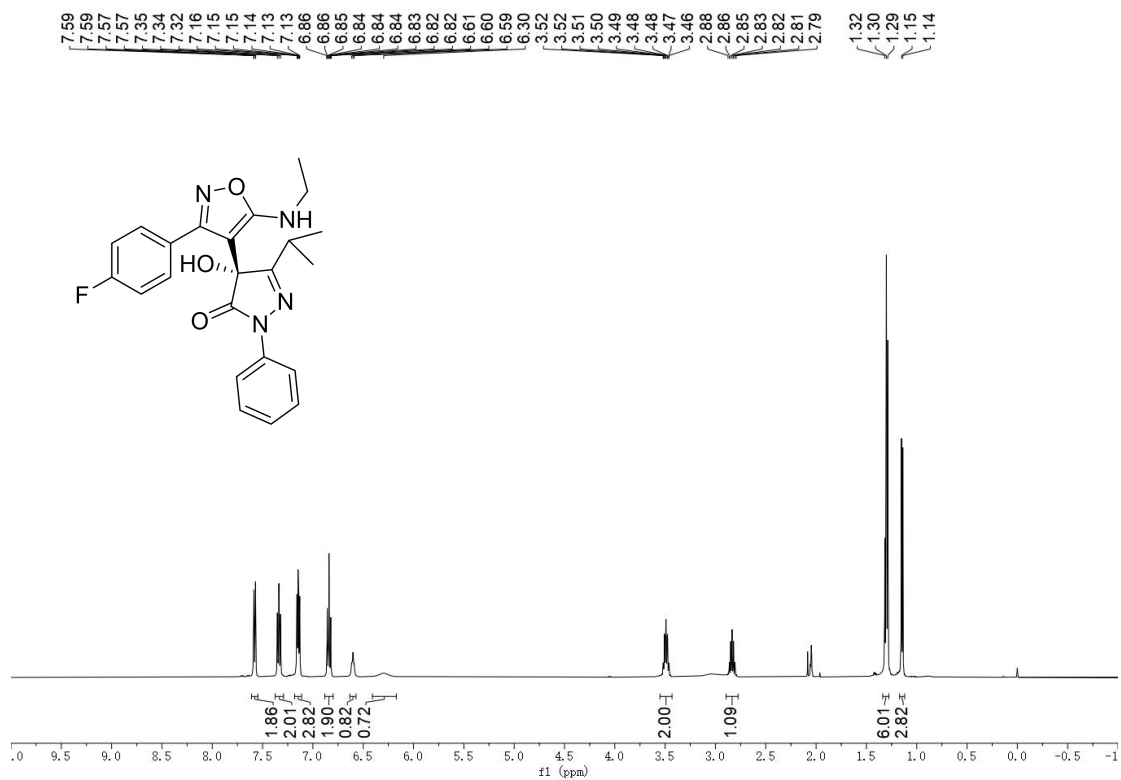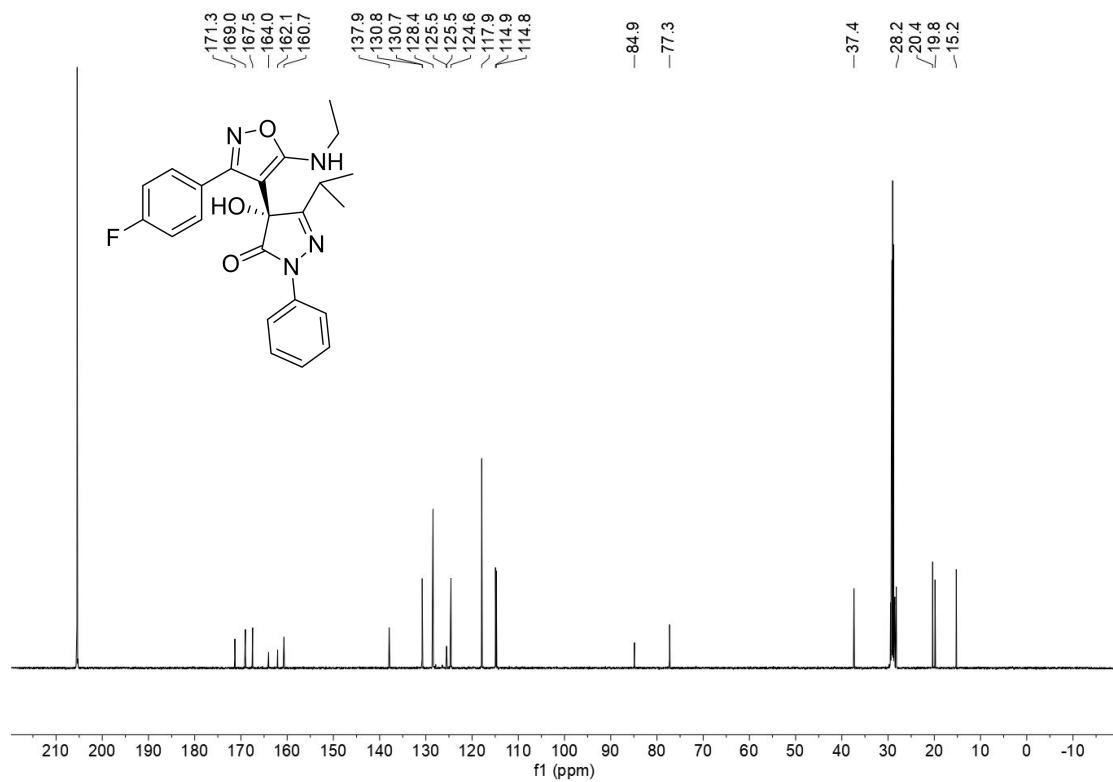

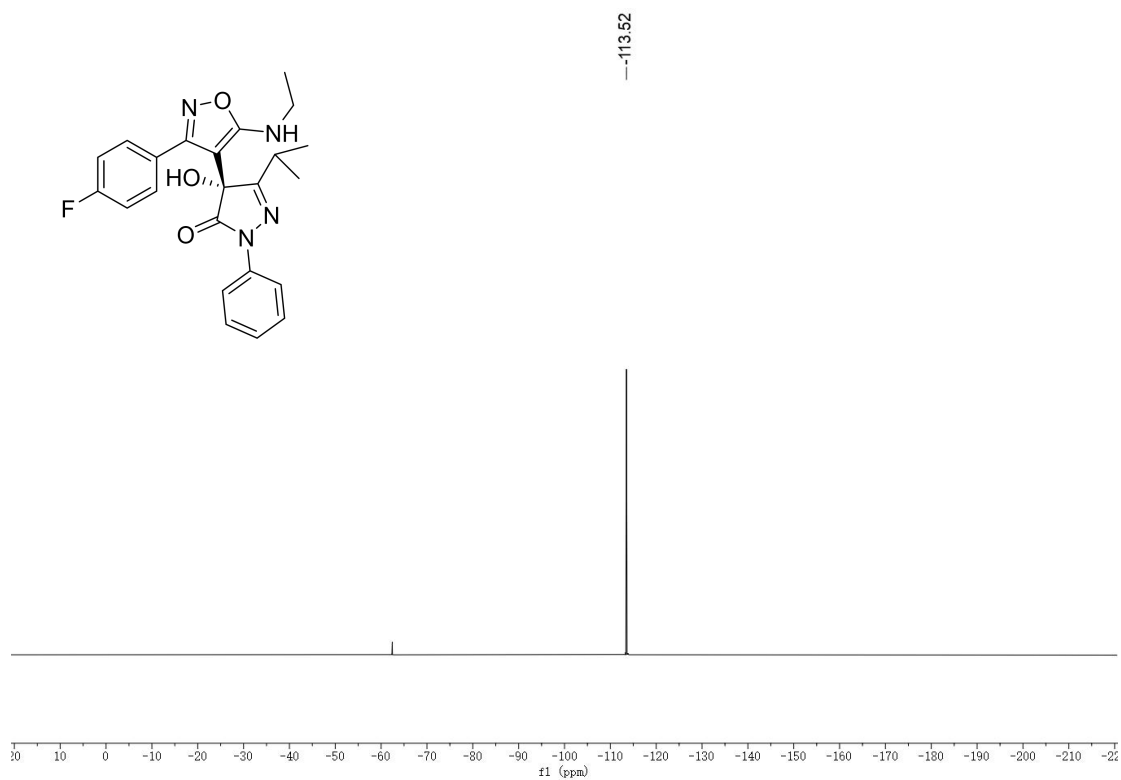

### $^1\text{H}$ NMR and $^{13}\text{C}$ NMR of 3ah

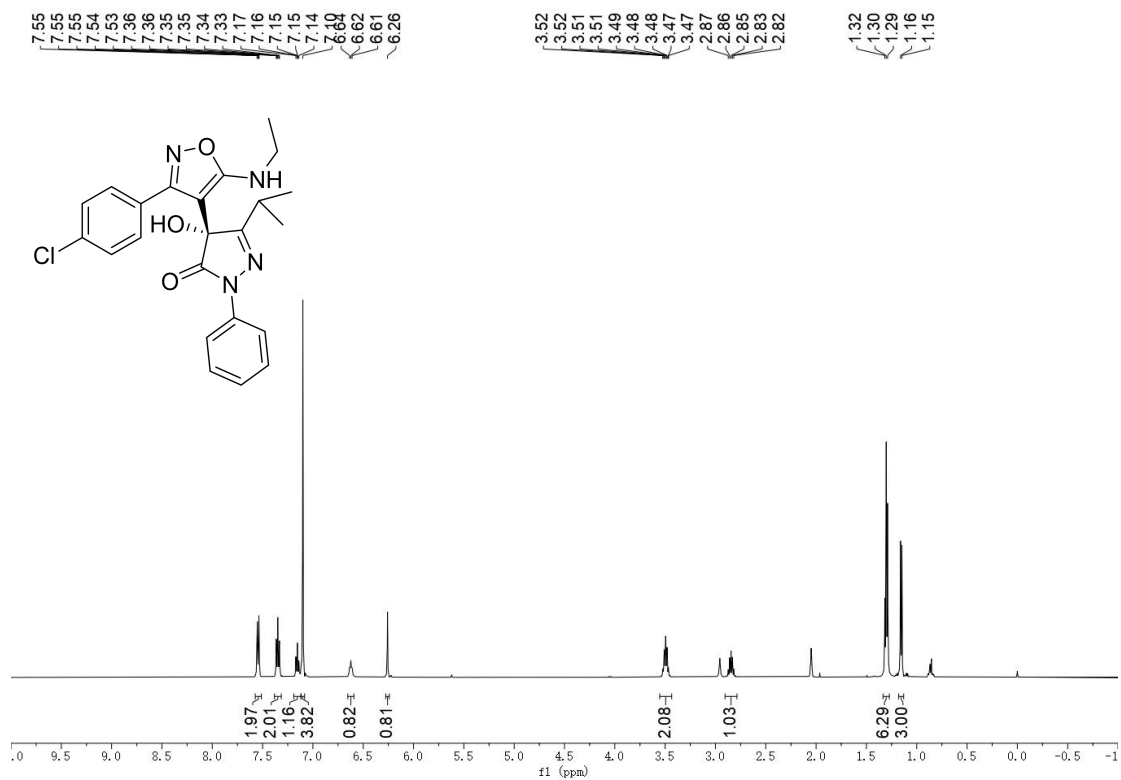



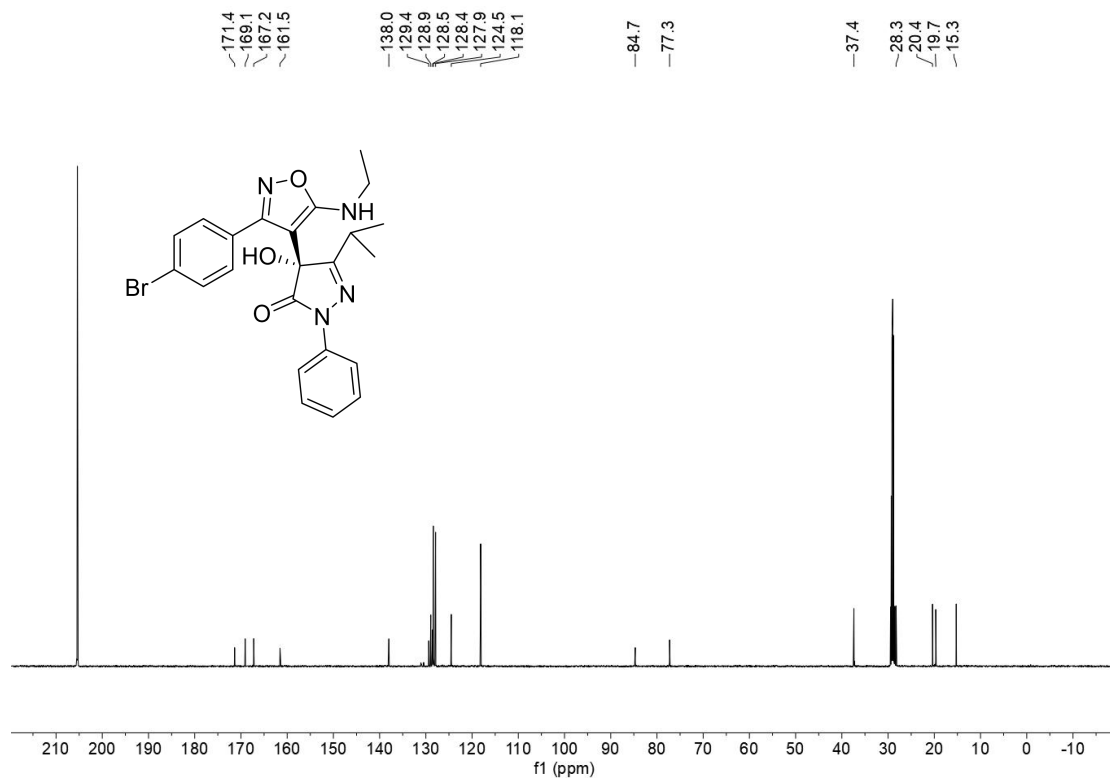

**<sup>1</sup>H NMR and <sup>13</sup>C NMR of 3aj**

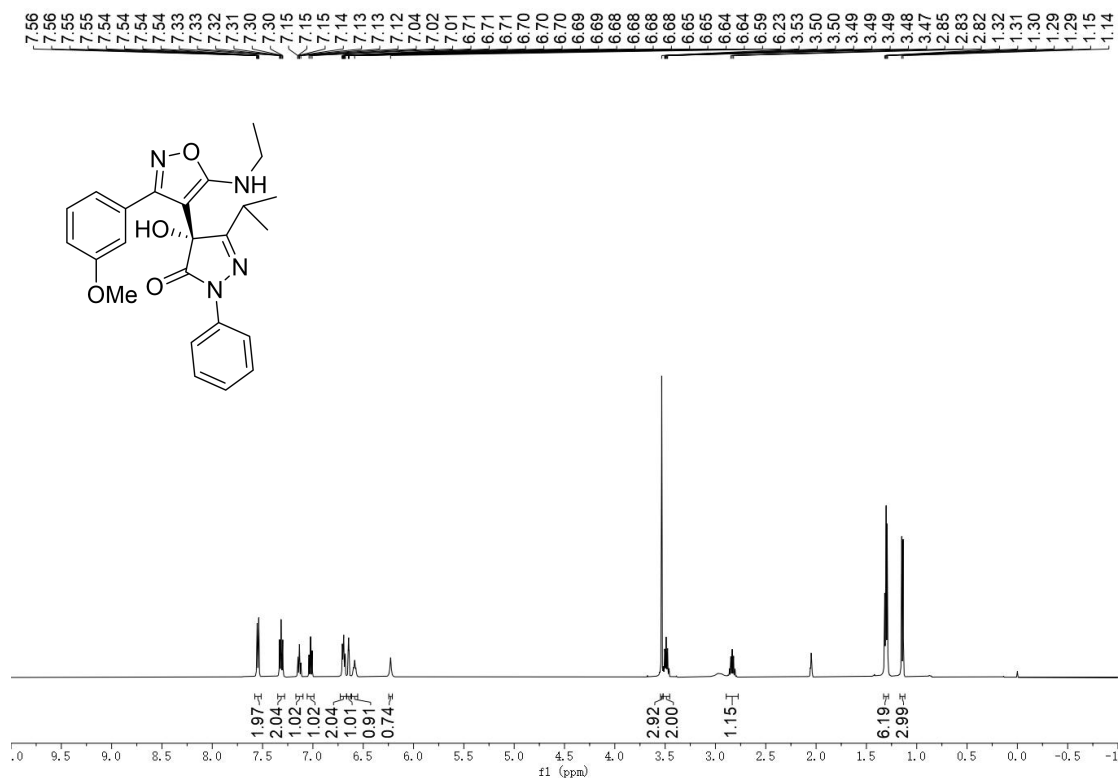

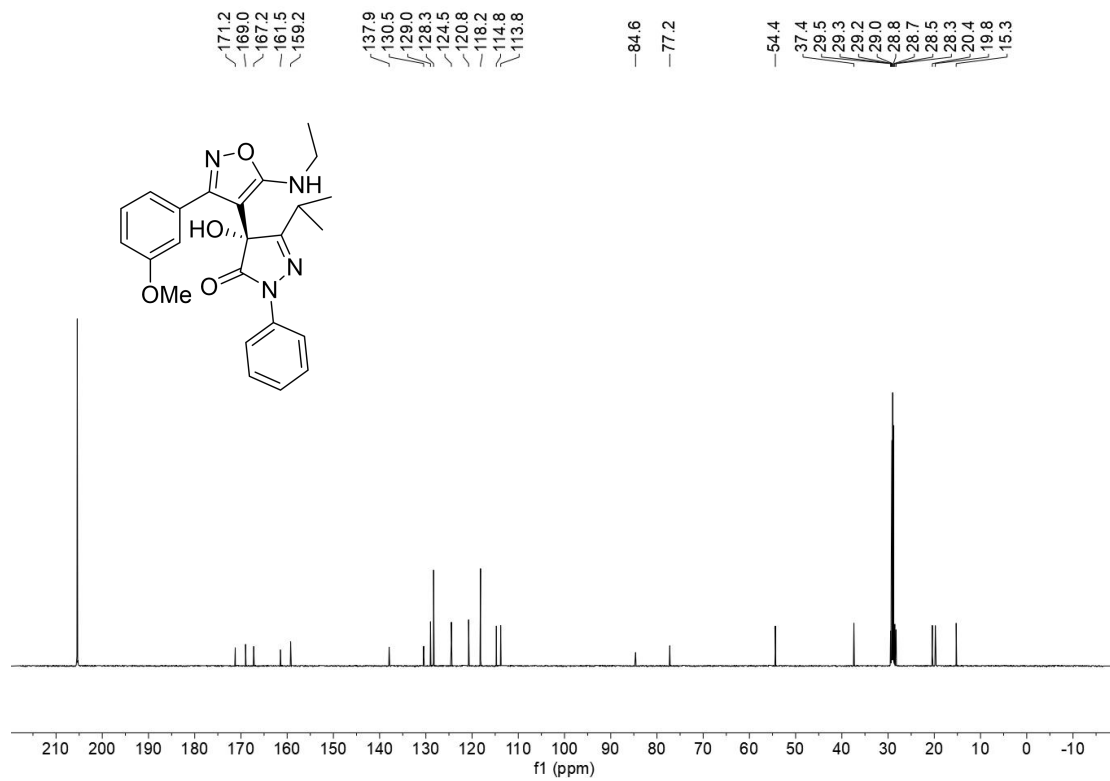

<sup>1</sup>H NMR and <sup>13</sup>C NMR of **3ak**

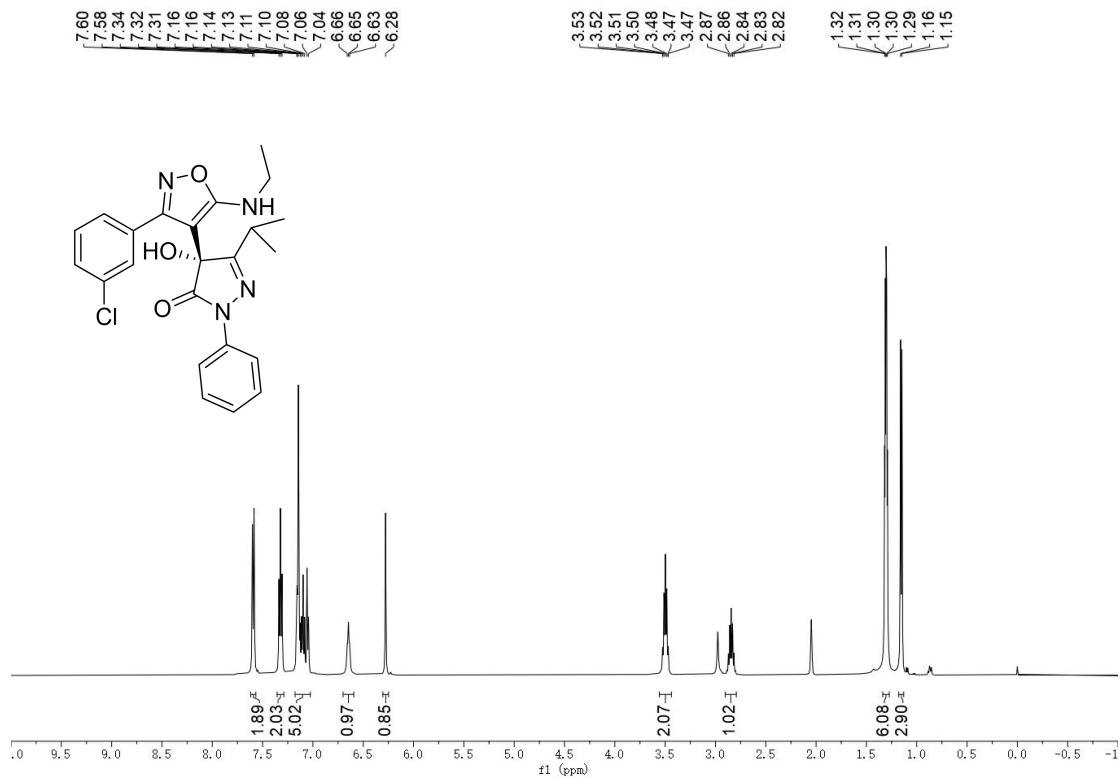



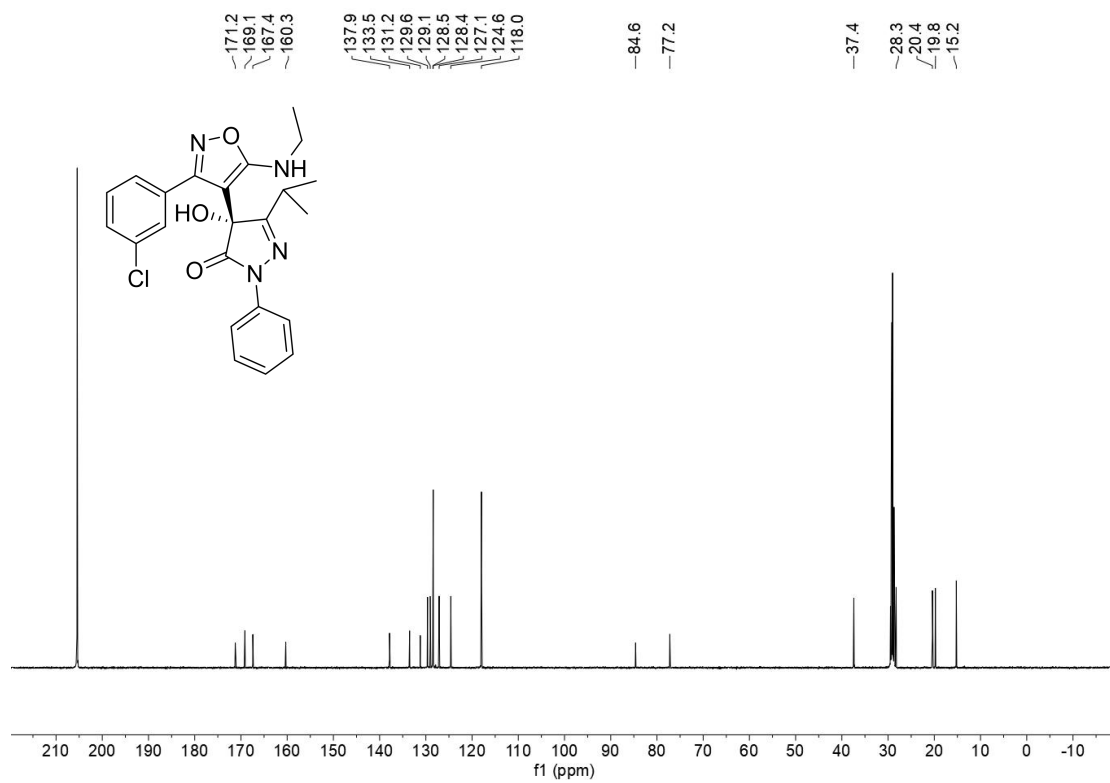

$^1\text{H}$  NMR,  $^{13}\text{C}$  NMR and  $^{19}\text{F}$  NMR of **3al**

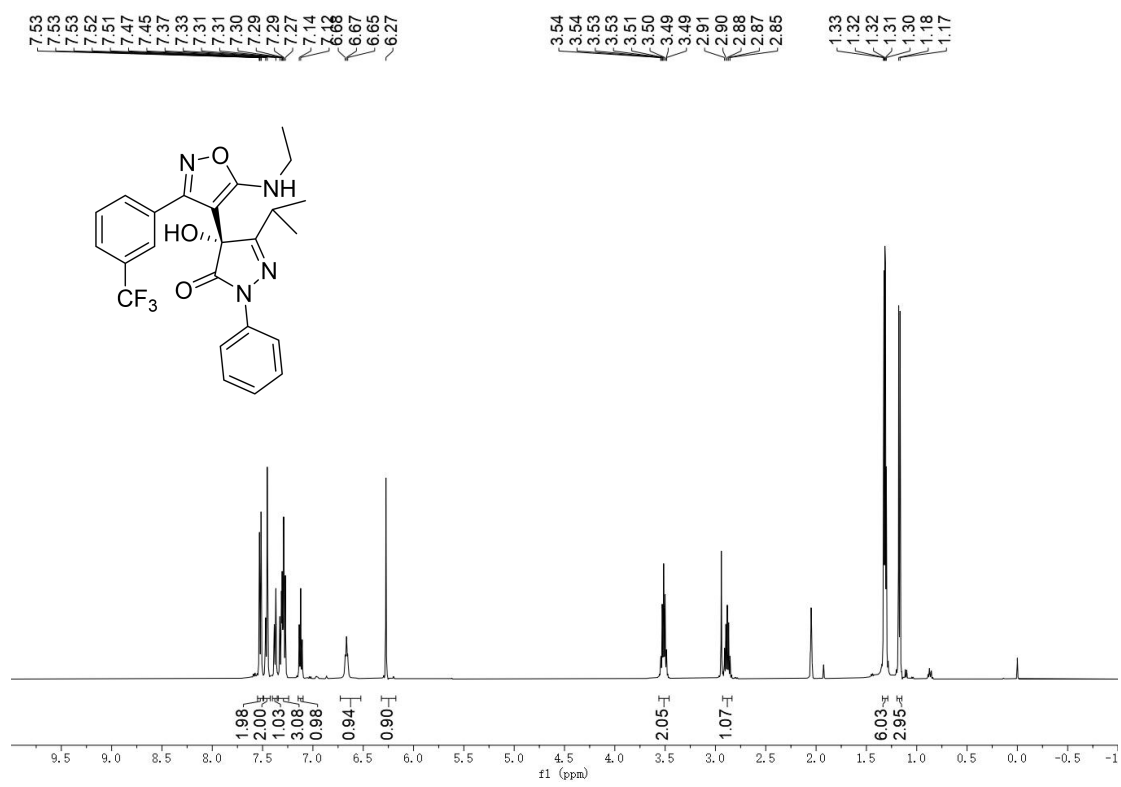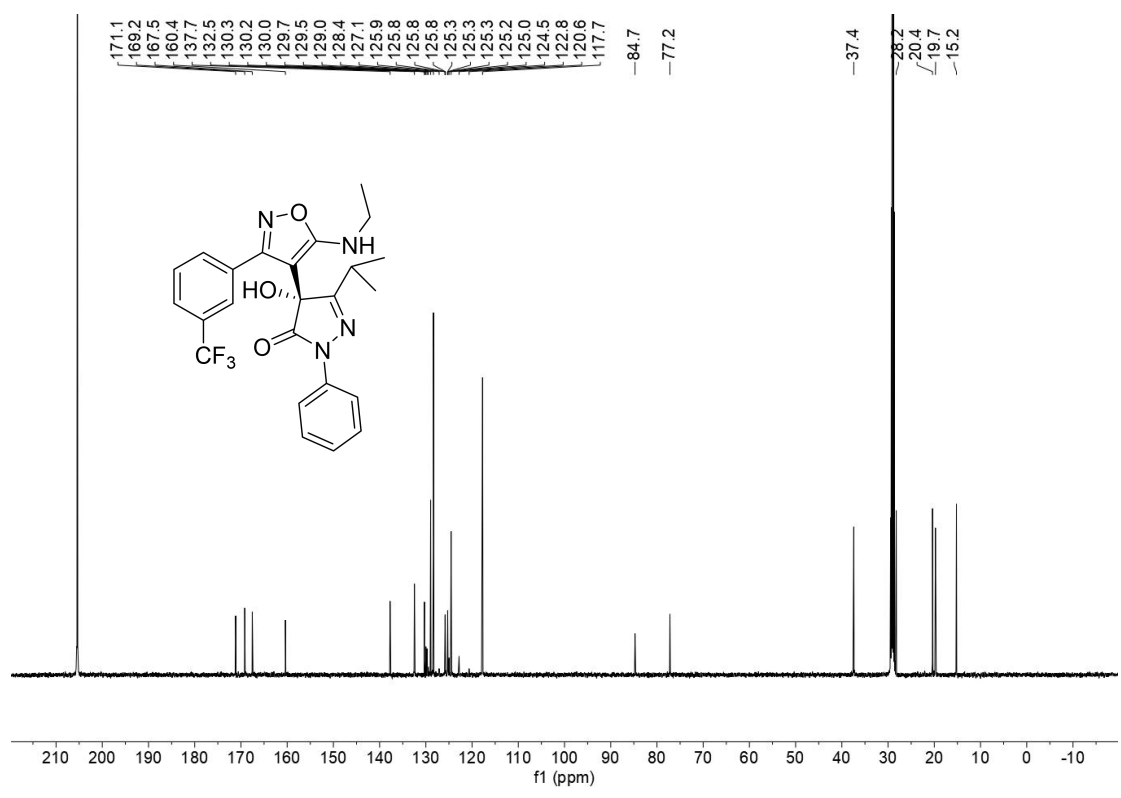

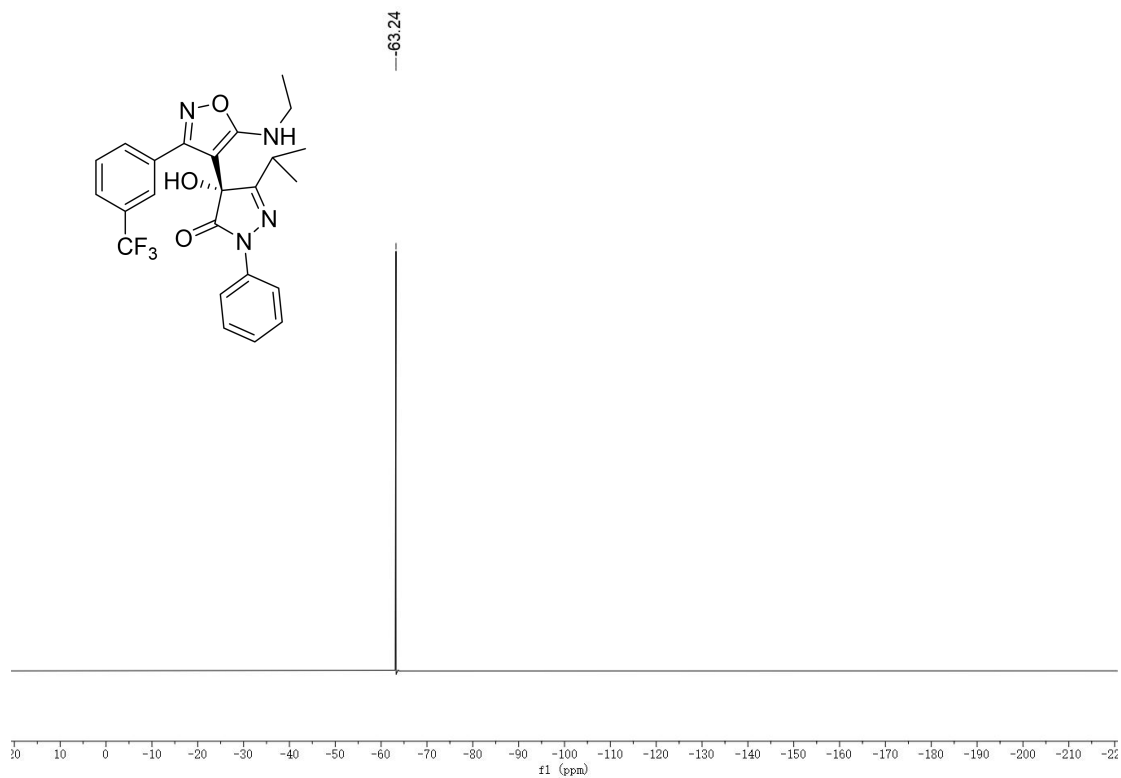

**<sup>1</sup>H NMR and <sup>13</sup>C NMR of 3am**

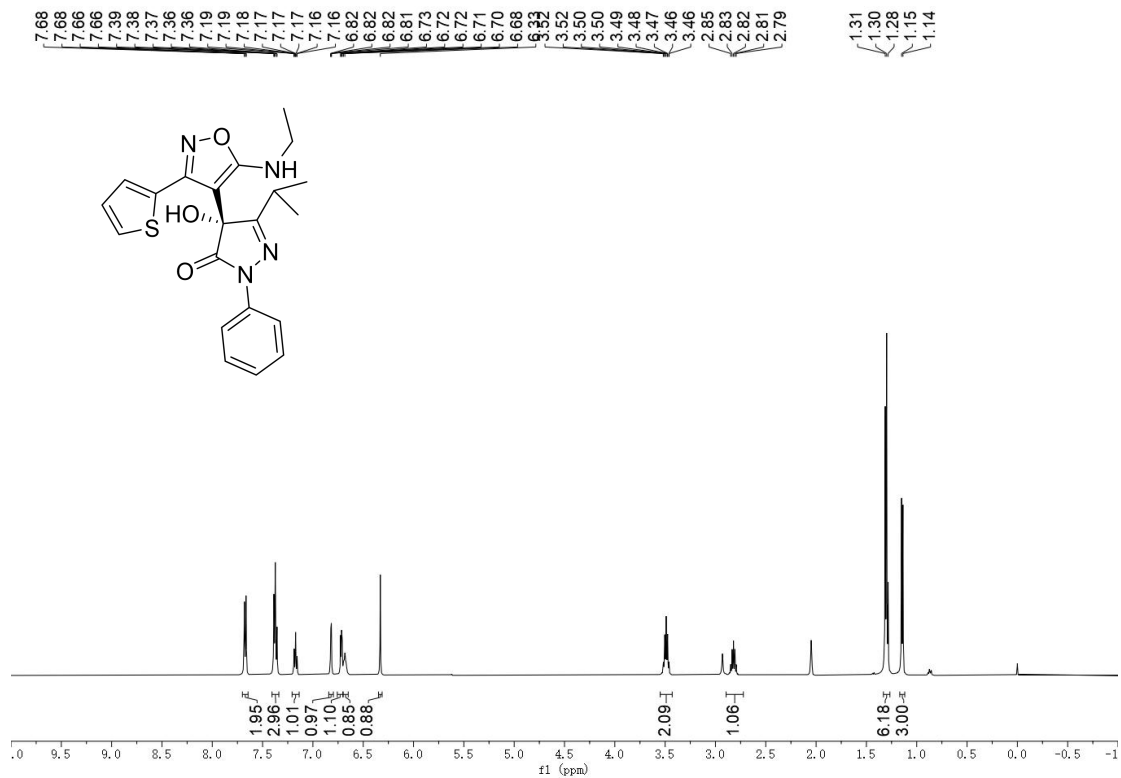

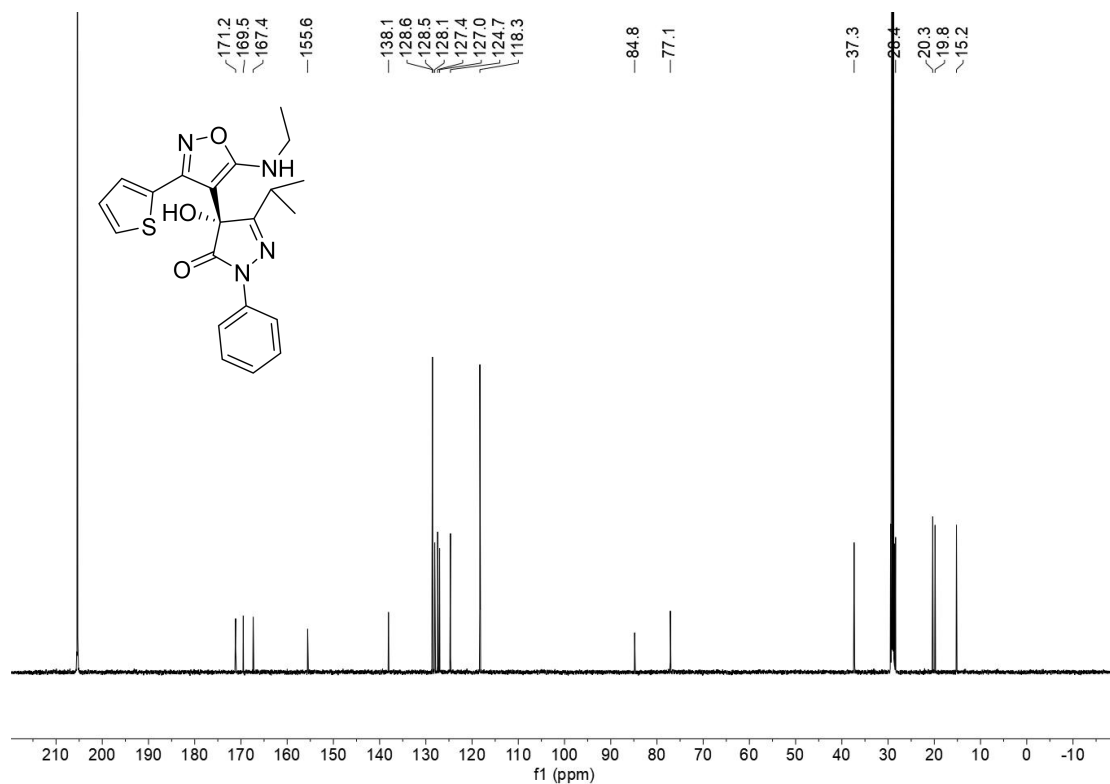

<sup>1</sup>H NMR and <sup>13</sup>C NMR of **3an**

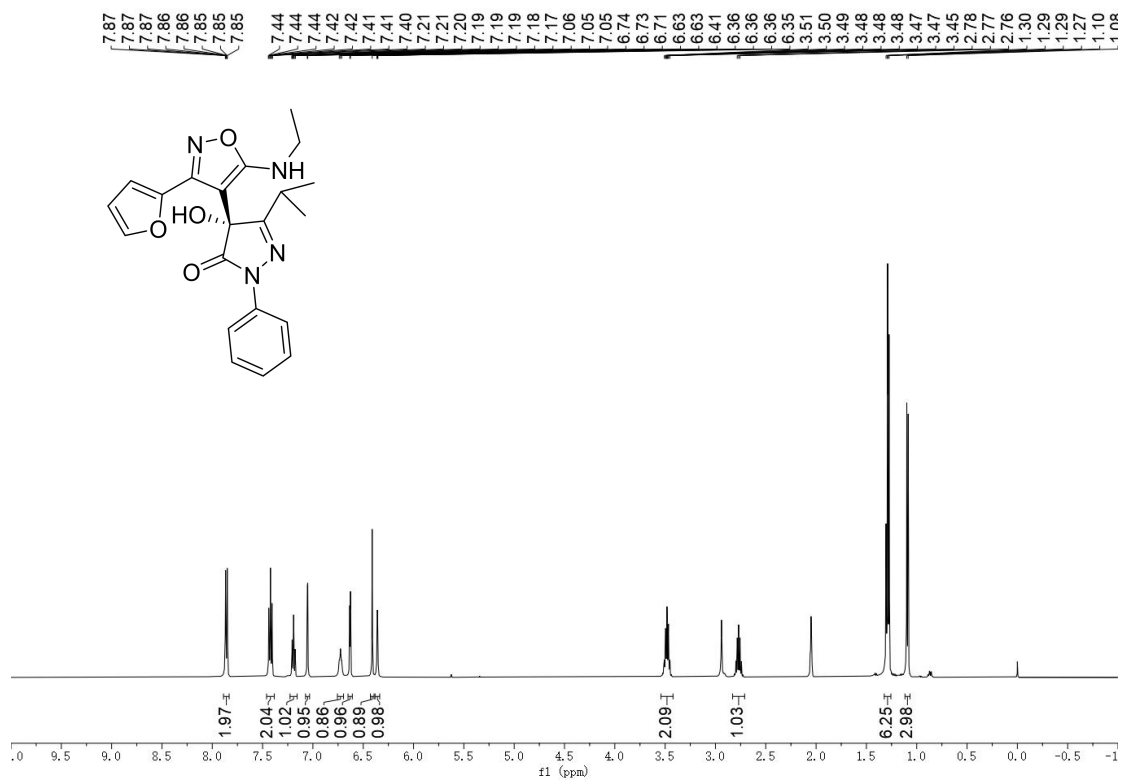

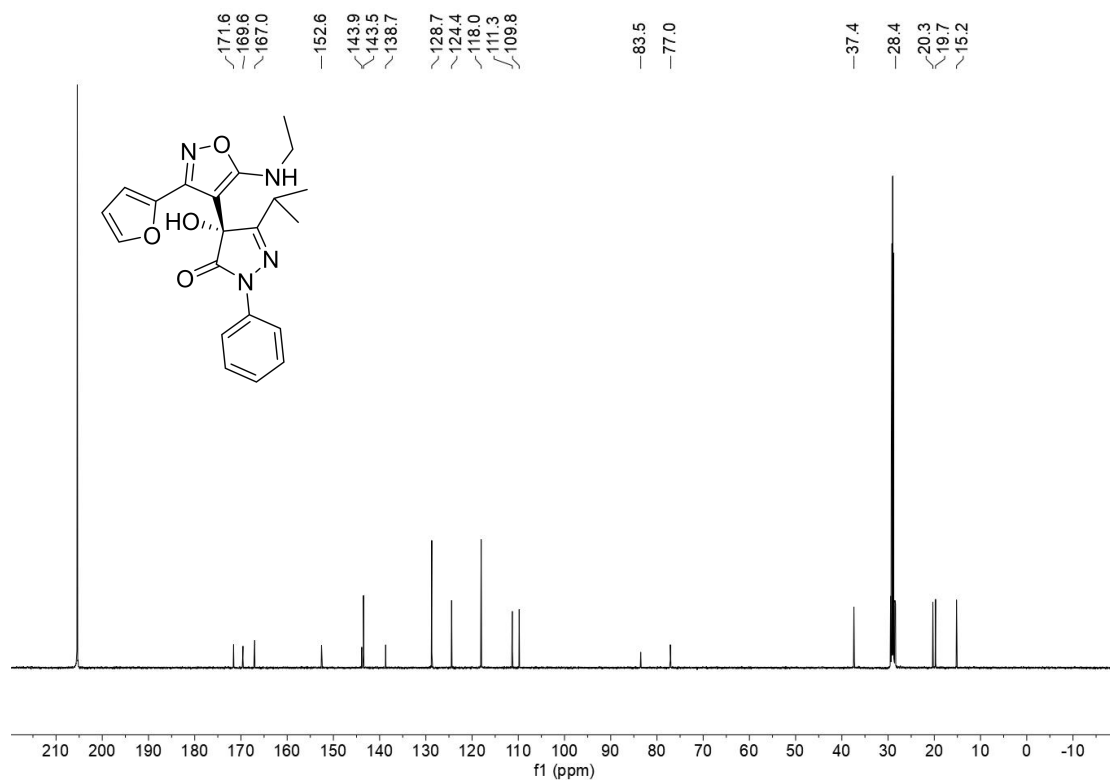

<sup>1</sup>H NMR and <sup>13</sup>C NMR of 4aa

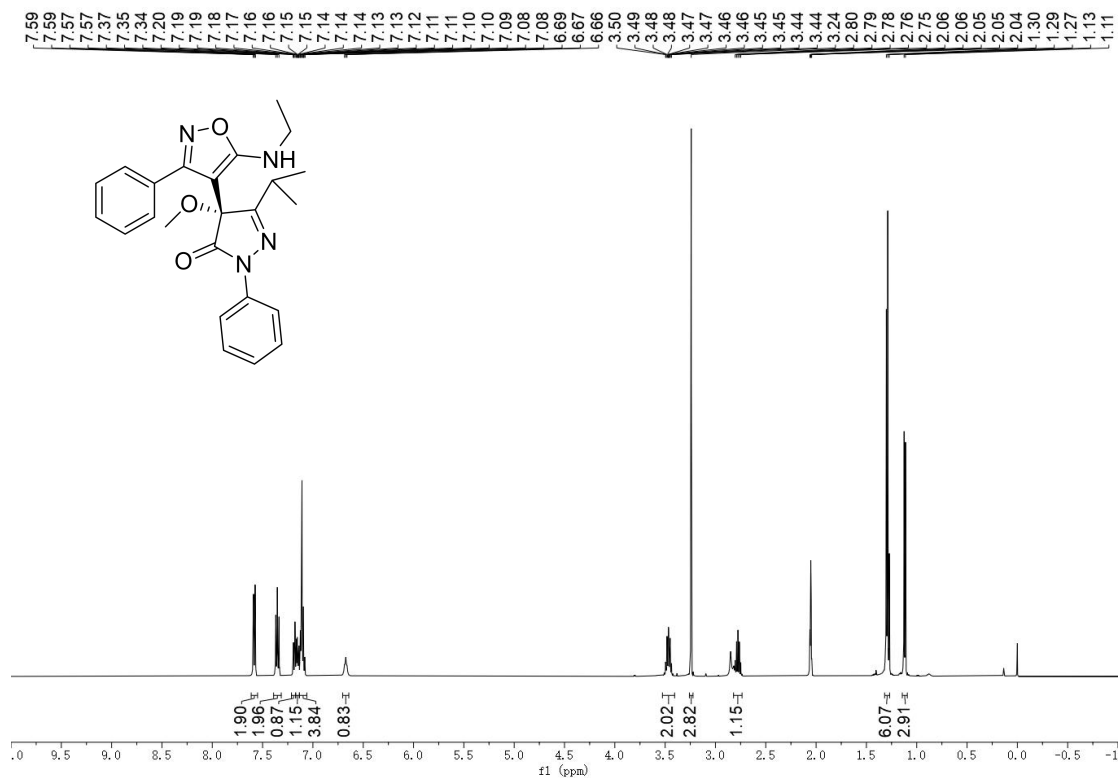

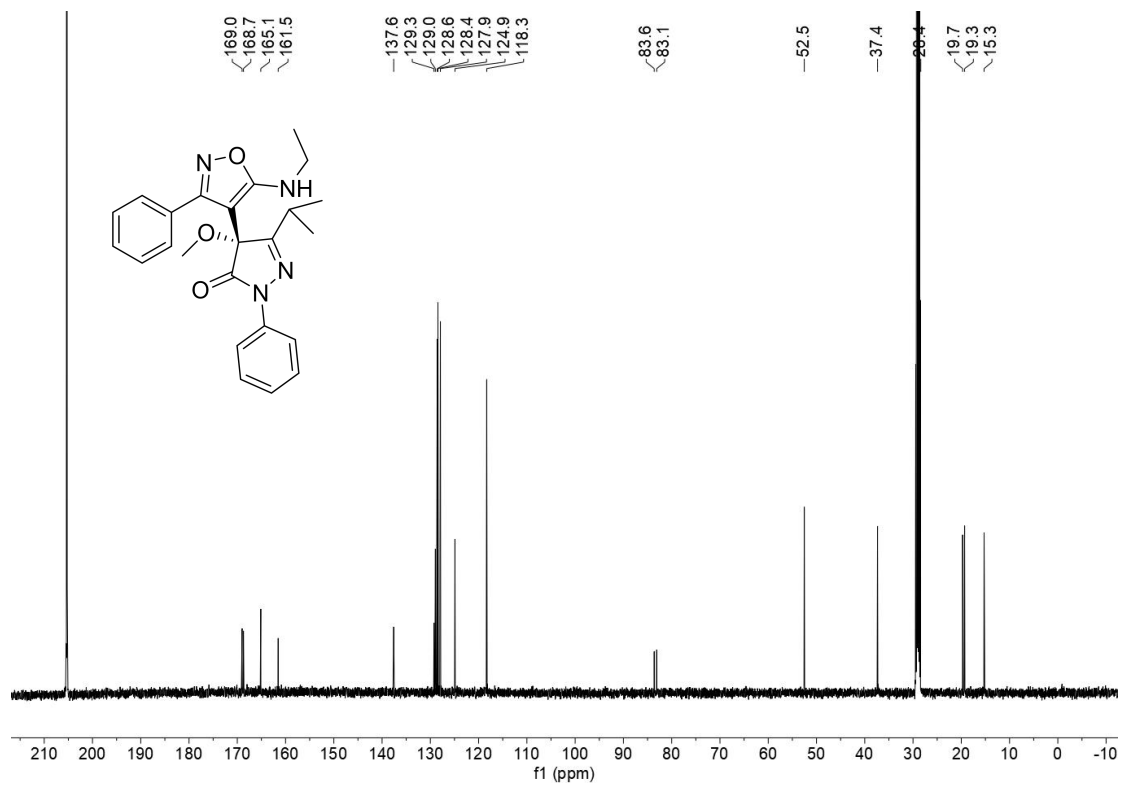

<sup>1</sup>H NMR and <sup>13</sup>C NMR of **5aa**

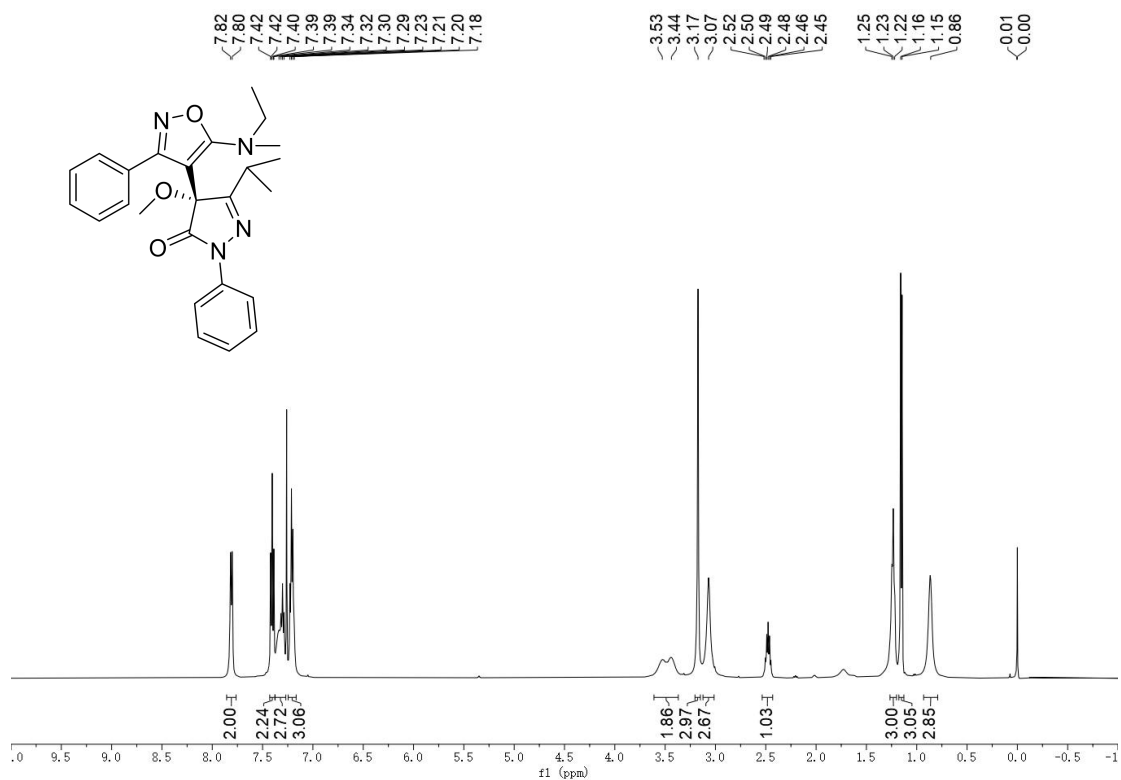

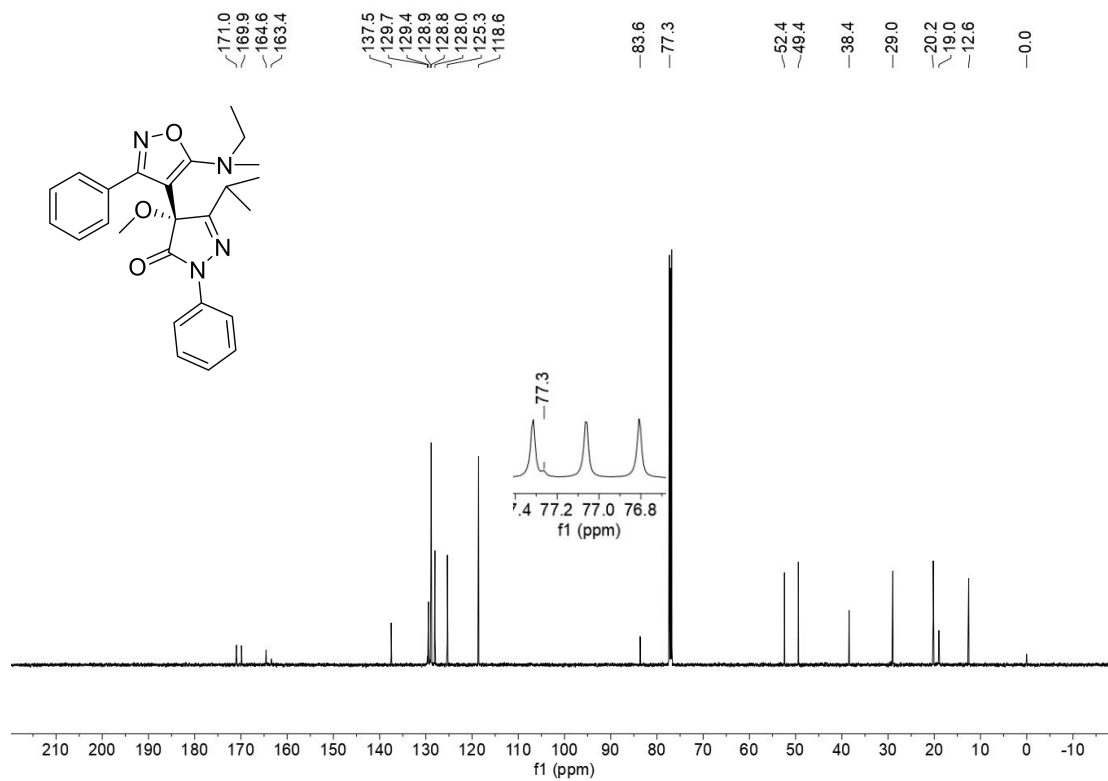

## Part III HPLC Spectra

### 3aa racemic mixture:

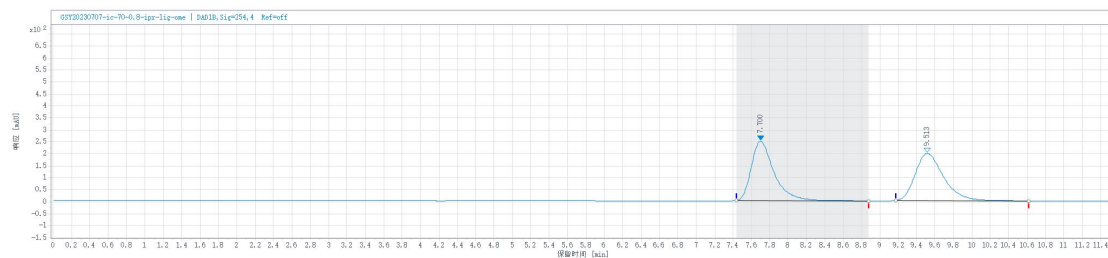

Signal: DAD1B, Sig=254, 4 Ref=off

| RetTime [min] | width [min] | Azer [mAU*s] | Height [mAU] | Area% |
|---------------|-------------|--------------|--------------|-------|
| 7.70          | 1.44        | 4241.65      | 247.41       | 50.26 |
| 9.51          | 1.45        | 4197.59      | 196.27       | 49.74 |

### 3aa

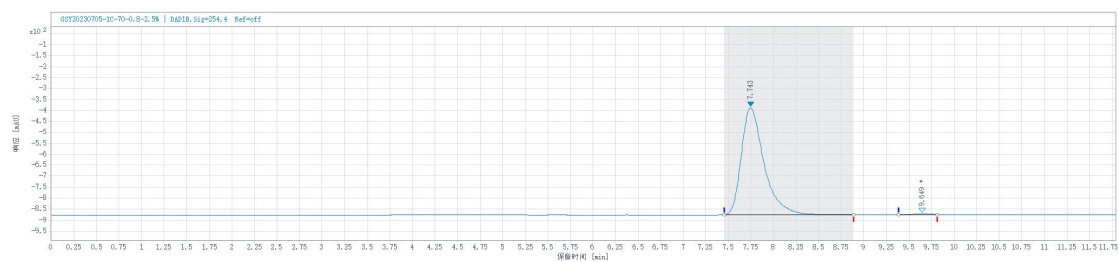

Signal: DAD1B, Sig=254, 4 Ref=off

| RetTime [min] | width [min] | Arer [mAU*s] | Height [mAU] | Area% |
|---------------|-------------|--------------|--------------|-------|
| 7.74          | 1.43        | 8510.05      | 487.34       | 99.54 |
| 9.65          | 0.43        | 39.69        | 2.78         | 0.46  |

### 3ba racemic mixture:

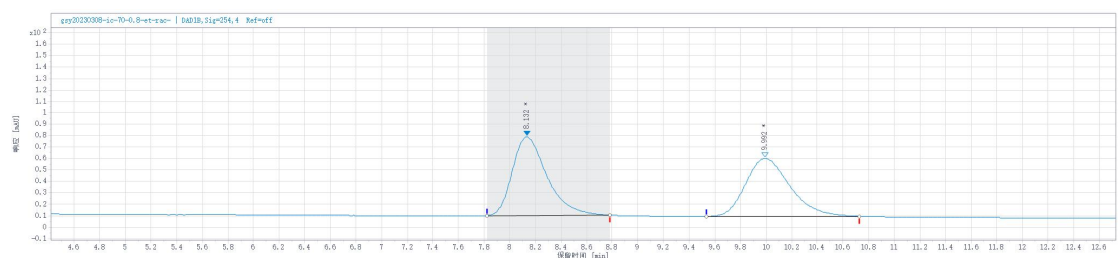

Signal: DAD1B, Sig=254, 4 Ref=off

| RetTime [min] | width [min] | Arer [mAU*s] | Height [mAU] | Area% |
|---------------|-------------|--------------|--------------|-------|
| 8.13          | 0.96        | 1286.19      | 68.54        | 51.44 |
| 9.99          | 1.19        | 1214.00      | 50.64        | 48.56 |

### 3ba

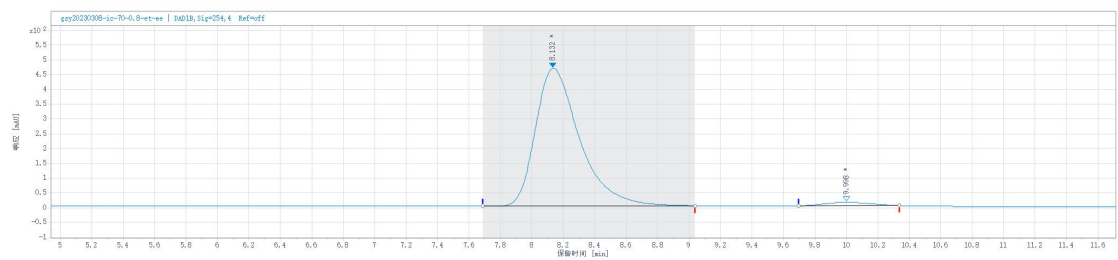

Signal: DAD1B, Sig=254, 4 Ref=off

| RetTime [min] | width [min] | Arer [mAU*s] | Height [mAU] | Area% |
|---------------|-------------|--------------|--------------|-------|
| 8.13          | 1.35        | 9068.29      | 465.37       | 97.47 |
| 10.00         | 0.65        | 235.61       | 11.68        | 2.53  |

### 3ca racemic mixture:



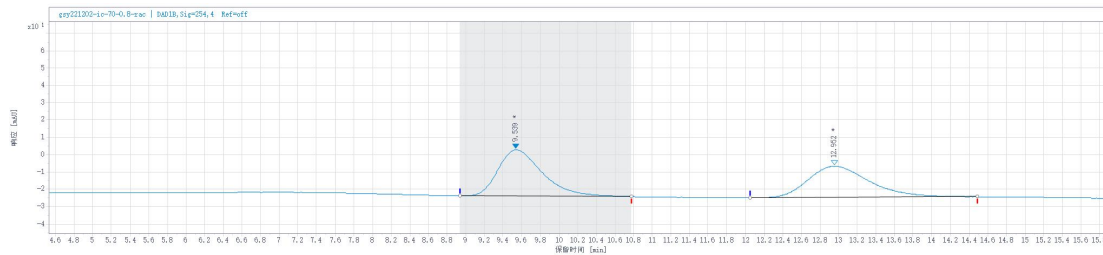

Signal: DAD1B, Sig=254, 4 Ref=off

| RetTime [min] | width [min] | Arer [mAU*s] | Height [mAU] | Area% |
|---------------|-------------|--------------|--------------|-------|
| 9.54          | 1.84        | 880.42       | 26.65        | 51.79 |
| 13.0          | 2.44        | 819.59       | 17.97        | 48.21 |

### 3ca

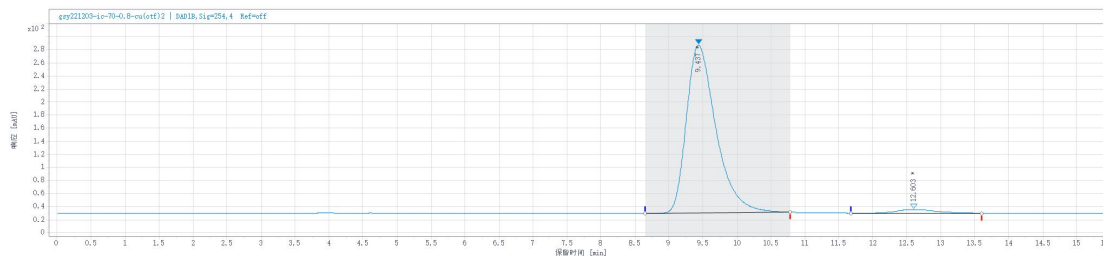

Signal: DAD1B, Sig=254, 4 Ref=off

| RetTime [min] | width [min] | Arer [mAU*s] | Height [mAU] | Area% |
|---------------|-------------|--------------|--------------|-------|
| 9.44          | 2.14        | 7774.57      | 257.05       | 97.22 |
| 12.6          | 1.93        | 222.72       | 5.58         | 2.78  |

### 3da racemic mixture:

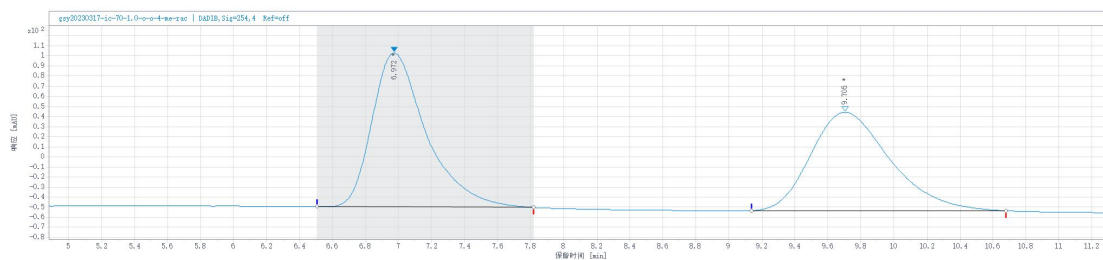

Signal: DAD1B, Sig=254, 4 Ref=off

| RetTime [min] | width [min] | Arer [mAU*s] | Height [mAU] | Area% |
|---------------|-------------|--------------|--------------|-------|
| 6.97          | 1.32        | 3491.75      | 153.25       | 51.64 |
| 9.70          | 1.54        | 3269.36      | 97.91        | 48.36 |

### 3da

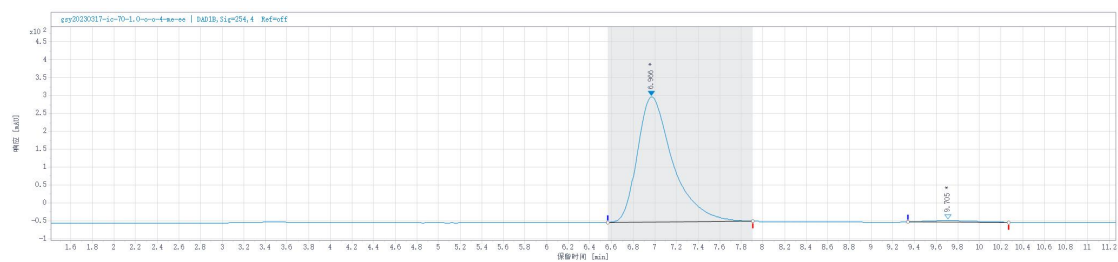

Signal: DAD1B, Sig=254,4 Ref=off

| RetTime [min] | width [min] | Arer [mAU*s] | Height [mAU] | Area% |
|---------------|-------------|--------------|--------------|-------|
| 6.97          | 1.34        | 7958.30      | 349.25       | 98.49 |
| 9.71          | 0.93        | 121.61       | 4.26         | 1.51  |

### 3ea racemic mixture:

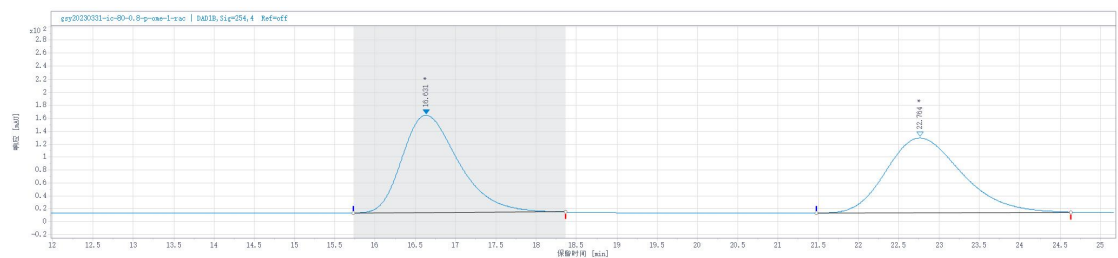

Signal: DAD1B, Sig=254,4 Ref=off

| RetTime [min] | width [min] | Arer [mAU*s] | Height [mAU] | Area% |
|---------------|-------------|--------------|--------------|-------|
| 16.6          | 2.63        | 7309.58      | 150.27       | 49.44 |
| 22.8          | 3.16        | 7476.24      | 115.02       | 50.56 |

### 3ea

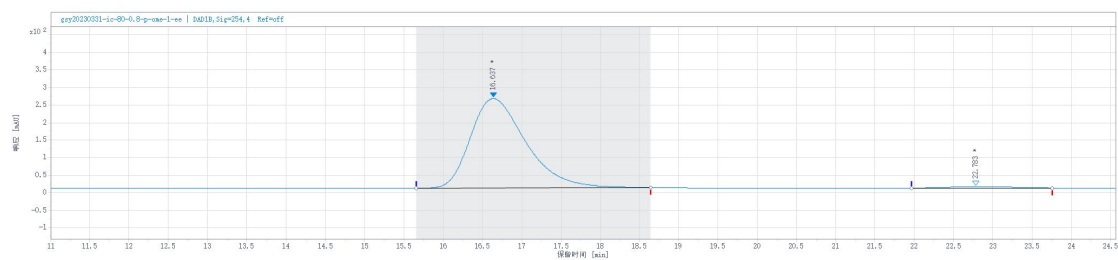

Signal: DAD1B, Sig=254,4 Ref=off

| RetTime [min] | width [min] | Arer [mAU*s] | Height [mAU] | Area% |
|---------------|-------------|--------------|--------------|-------|
| 16.6          | 2.98        | 12521.45     | 254.86       | 98.30 |
| 22.8          | 1.80        | 216.09       | 3.94         | 1.70  |

### 3fa racemic mixture:

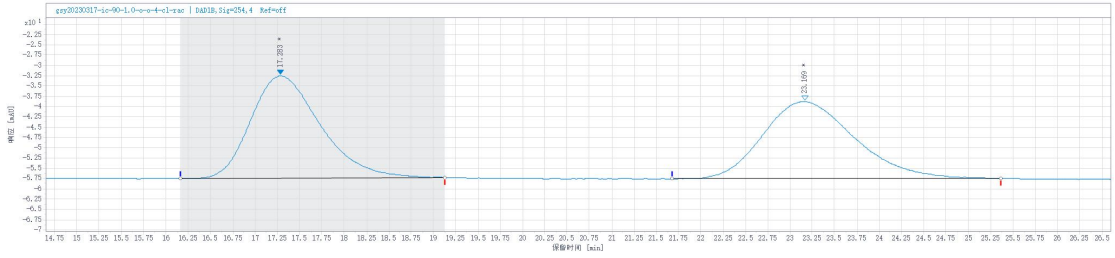

Signal: DAD1B, Sig=254, 4 Ref=off

| RetTime [min] | width [min] | Arer [mAU*s] | Height [mAU] | Area% |
|---------------|-------------|--------------|--------------|-------|
| 17.3          | 2.97        | 1345.23      | 24.88        | 50.23 |
| 23.2          | 3.69        | 1332.76      | 18.71        | 49.77 |

### 3fa

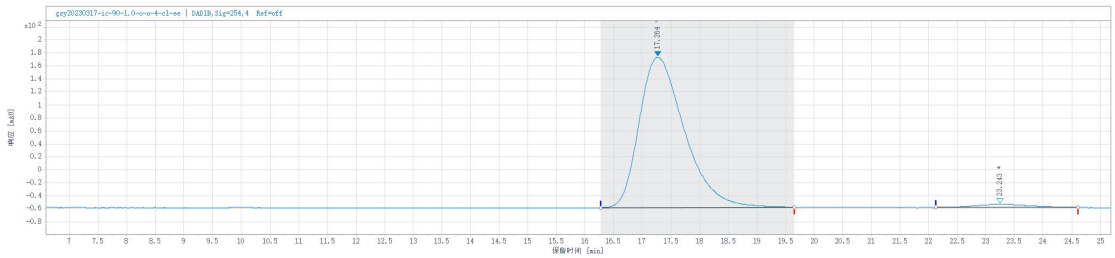

Signal: DAD1B, Sig=254, 4 Ref=off

| RetTime [min] | width [min] | Arer [mAU*s] | Height [mAU] | Area% |
|---------------|-------------|--------------|--------------|-------|
| 17.3          | 3.38        | 12639.41     | 231.01       | 97.55 |
| 23.2          | 2.47        | 317.20       | 4.80         | 2.45  |

### 3ga racemic mixture:

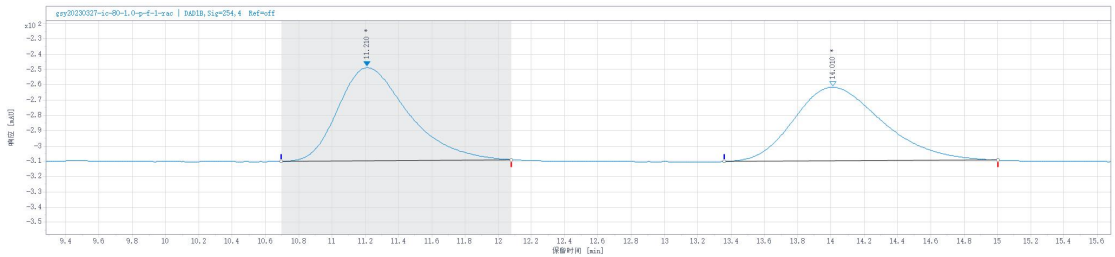

Signal: DAD1B, Sig=254, 4 Ref=off

| RetTime [min] | width [min] | Arer [mAU*s] | Height [mAU] | Area% |
|---------------|-------------|--------------|--------------|-------|
| 11.2          | 1.38        | 1785.62      | 60.88        | 49.97 |
| 14.0          | 1.65        | 1787.73      | 48.19        | 50.03 |

### 3ga

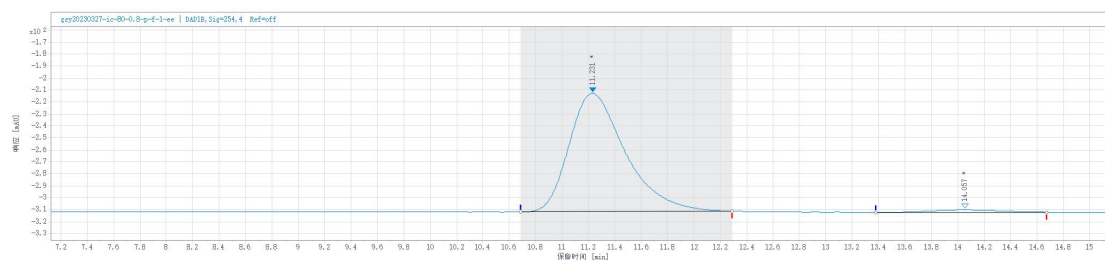

Signal: DAD1B, Sig=254, 4 Ref=off

| RetTime [min] | width [min] | Area [mAU*s] | Height [mAU] | Area% |
|---------------|-------------|--------------|--------------|-------|
| 11.2          | 1.60        | 2936.35      | 99.03        | 97.81 |
| 14.1          | 1.30        | 65.87        | 1.98         | 2.19  |

### 3ha racemic mixture:

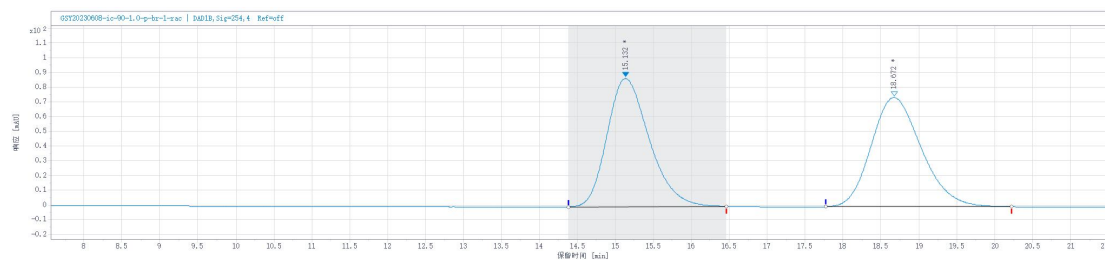

Signal: DAD1B, Sig=254, 4 Ref=off

| RetTime [min] | width [min] | Area [mAU*s] | Height [mAU] | Area% |
|---------------|-------------|--------------|--------------|-------|
| 15.1          | 2.08        | 3367.34      | 87.16        | 49.66 |
| 18.7          | 2.45        | 3414.11      | 74.21        | 50.34 |

### 3ha

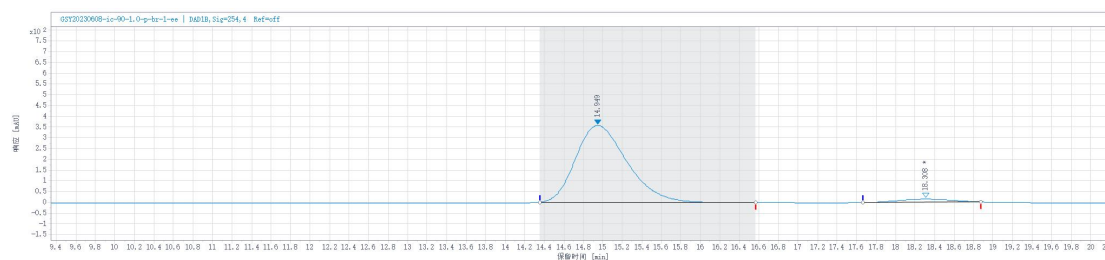

Signal: DAD1B, Sig=254, 4 Ref=off

| RetTime [min] | width [min] | Area [mAU*s] | Height [mAU] | Area% |
|---------------|-------------|--------------|--------------|-------|
| 14.9          | 2.21        | 13055.25     | 356.25       | 95.92 |
| 18.3          | 1.22        | 555.57       | 14.57        | 4.08  |

### 3ia racemic mixture:

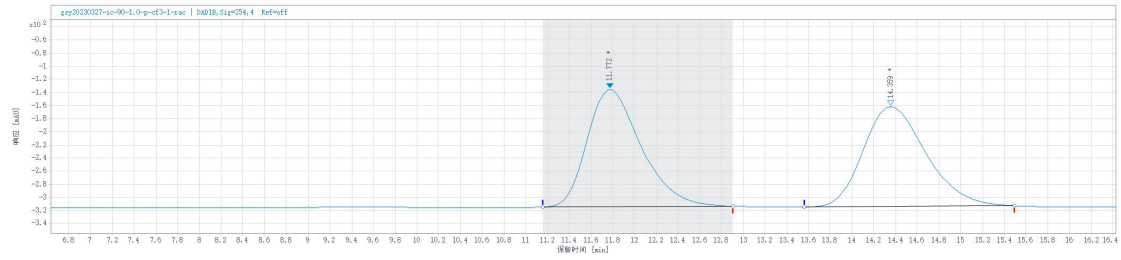

Signal: DAD1B, Sig=254, 4 Ref=off

| RetTime [min] | width [min] | Area [mAU*s] | Height [mAU] | Area% |
|---------------|-------------|--------------|--------------|-------|
| 11.8          | 1.75        | 6154.34      | 178.72       | 50.20 |
| 14.4          | 1.93        | 6104.53      | 152.01       | 49.80 |

### 3ia

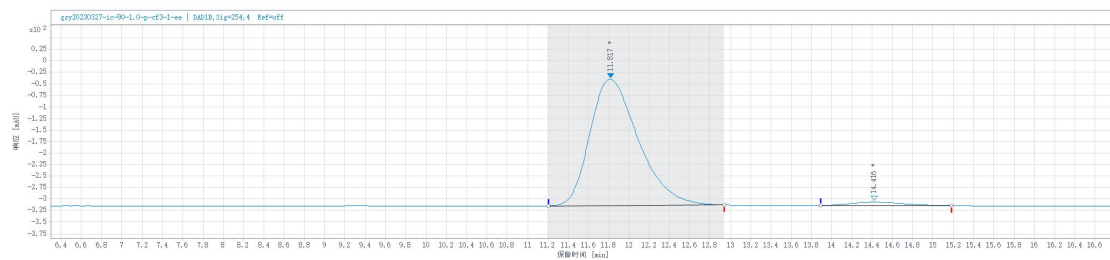

Signal: DAD1B, Sig=254, 4 Ref=off

| RetTime [min] | width [min] | Area [mAU*s] | Height [mAU] | Area% |
|---------------|-------------|--------------|--------------|-------|
| 11.8          | 1.73        | 9110.24      | 274.40       | 97.08 |
| 14.4          | 1.29        | 273.62       | 7.47         | 2.92  |

### 3ja racemic mixture:

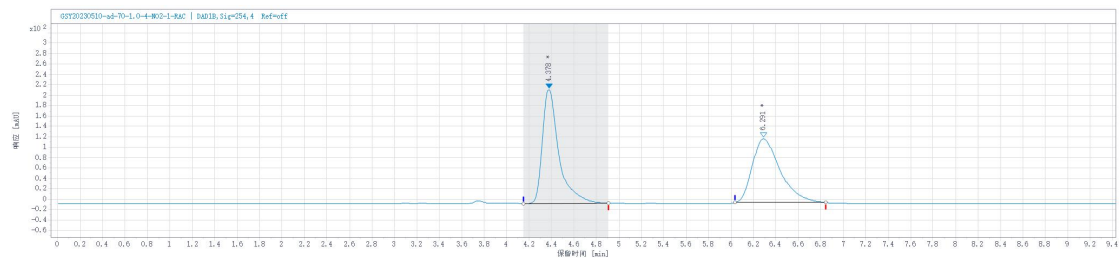

Signal: DAD1B, Sig=254, 4 Ref=off

| RetTime [min] | width [min] | Area [mAU*s] | Height [mAU] | Area% |
|---------------|-------------|--------------|--------------|-------|
| 4.38          | 0.76        | 2222.76      | 218.93       | 51.08 |
| 6.29          | 0.80        | 2128.86      | 122.78       | 48.92 |

### 3ja

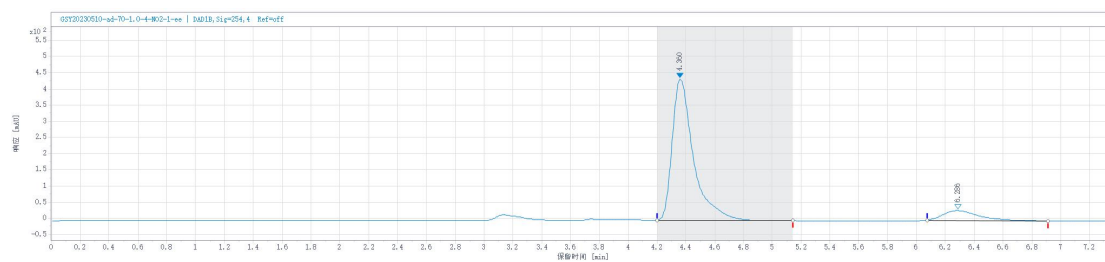

Signal: DAD1B, Sig=254, 4 Ref=off

| RetTime [min] | width [min] | Arer [mAU*s] | Height [mAU] | Area% |
|---------------|-------------|--------------|--------------|-------|
| 4.36          | 0.94        | 4452.73      | 435.58       | 89.81 |
| 6.29          | 0.84        | 505.14       | 30.06        | 10.19 |

### 3ka racemic mixture:

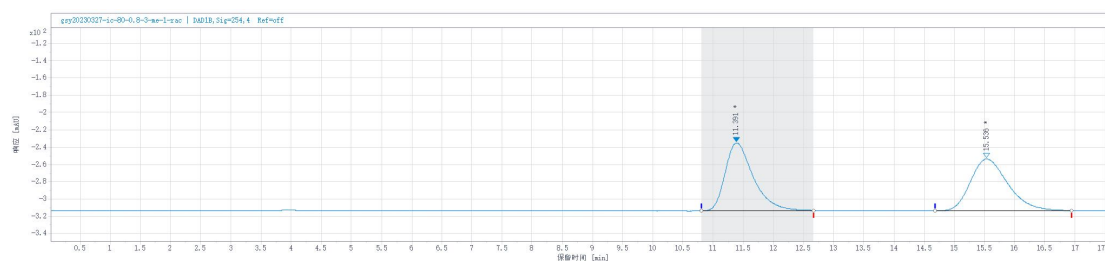

Signal: DAD1B, Sig=254, 4 Ref=off

| RetTime [min] | width [min] | Arer [mAU*s] | Height [mAU] | Area% |
|---------------|-------------|--------------|--------------|-------|
| 11.4          | 1.86        | 2529.70      | 78.29        | 49.70 |
| 15.5          | 2.25        | 2560.18      | 59.60        | 50.30 |

### 3ka

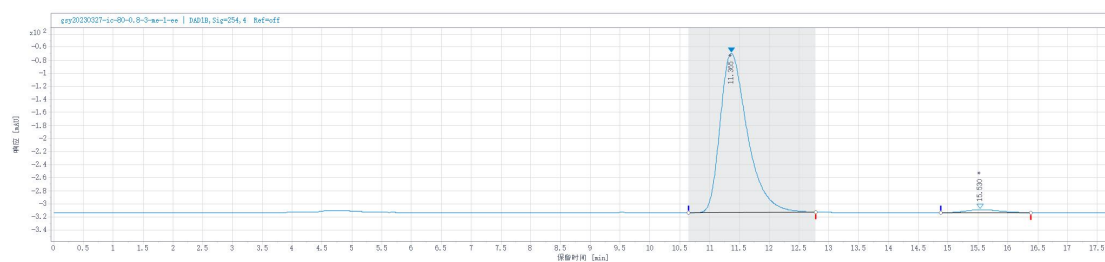

Signal: DAD1B, Sig=254, 4 Ref=off

| RetTime [min] | width [min] | Arer [mAU*s] | Height [mAU] | Area% |
|---------------|-------------|--------------|--------------|-------|
| 11.4          | 2.13        | 7757.06      | 244.30       | 97.66 |
| 15.5          | 1.51        | 185.50       | 4.68         | 2.34  |

### 3la racemic mixture:

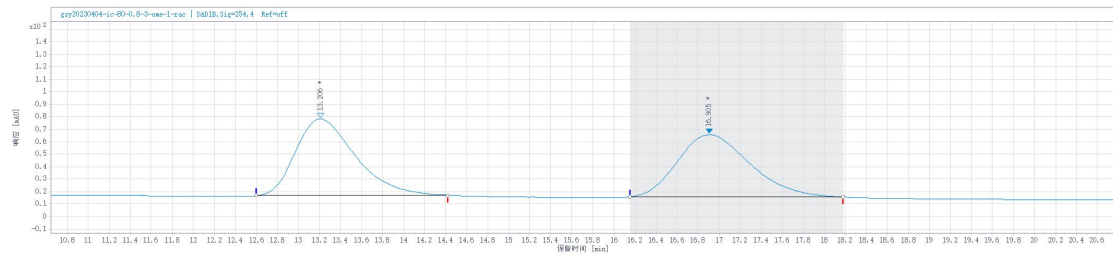

Signal: DAD1B, Sig=254, 4 Ref=off

| RetTime [min] | width [min] | Arer [mAU*s] | Height [mAU] | Area% |
|---------------|-------------|--------------|--------------|-------|
| 13.2          | 1.82        | 2415.88      | 61.38        | 50.30 |
| 16.9          | 2.03        | 2387.02      | 49.84        | 49.70 |

3la

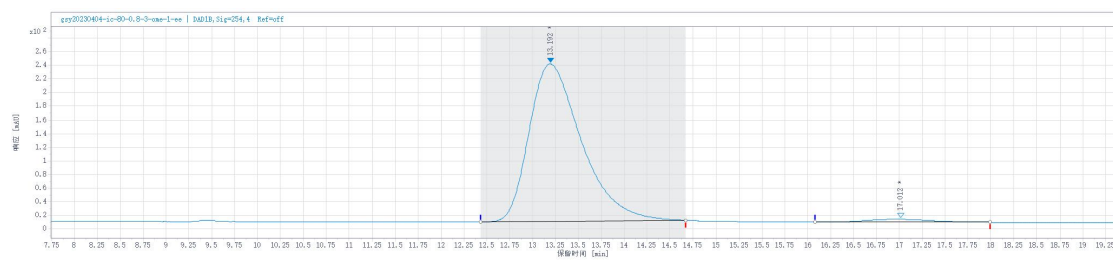

Signal: DAD1B, Sig=254, 4 Ref=off

| RetTime [min] | width [min] | Arer [mAU*s] | Height [mAU] | Area% |
|---------------|-------------|--------------|--------------|-------|
| 13.2          | 2.24        | 9154.73      | 230.50       | 97.82 |
| 17.0          | 1.91        | 203.69       | 4.29         | 2.18  |

3ma racemic mixture:

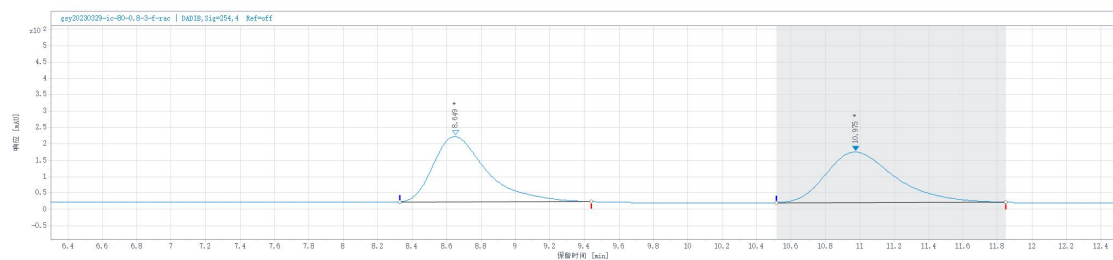

Signal: DAD1B, Sig=254, 4 Ref=off

| RetTime [min] | width [min] | Arer [mAU*s] | Height [mAU] | Area% |
|---------------|-------------|--------------|--------------|-------|
| 8.65          | 1.11        | 4276.33      | 199.29       | 49.82 |
| 11.0          | 1.33        | 4307.03      | 154.11       | 50.18 |

### 3ma

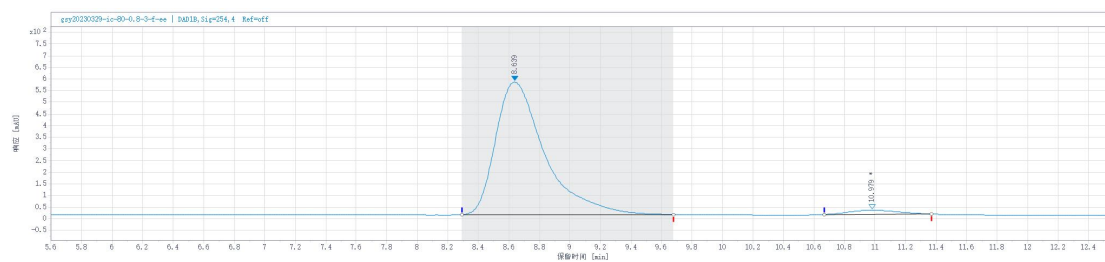

Signal: DAD1B, Sig=254, 4 Ref=off

| RetTime [min] | width [min] | Area [mAU*s] | Height [mAU] | Area% |
|---------------|-------------|--------------|--------------|-------|
| 8.64          | 1.39        | 12722.70     | 568.76       | 97.08 |
| 11.0          | 0.71        | 382.95       | 17.28        | 2.92  |

### 3na racemic mixture:

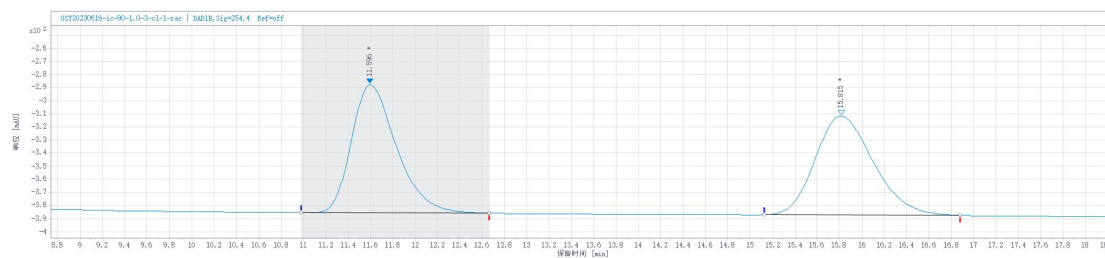

Signal: DAD1B, Sig=254, 4 Ref=off

| RetTime [min] | width [min] | Area [mAU*s] | Height [mAU] | Area% |
|---------------|-------------|--------------|--------------|-------|
| 11.6          | 1.68        | 2750.18      | 98.06        | 50.08 |
| 15.8          | 1.75        | 2741.09      | 75.77        | 49.92 |

### 3na

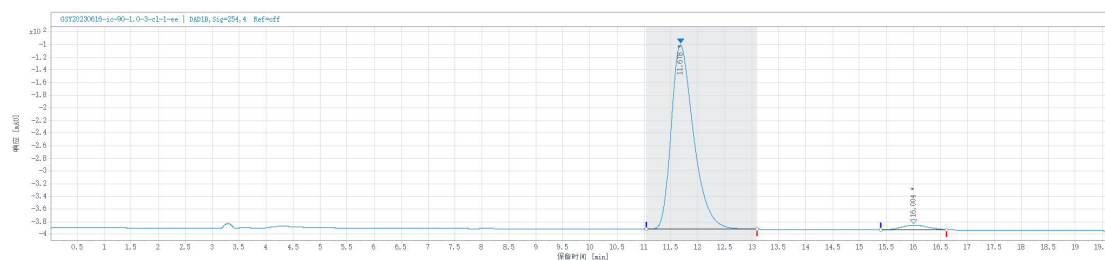

Signal: DAD1B, Sig=254, 4 Ref=off

| RetTime [min] | width [min] | Area [mAU*s] | Height [mAU] | Area% |
|---------------|-------------|--------------|--------------|-------|
| 11.7          | 2.06        | 8435.20      | 291.65       | 97.16 |
| 16.0          | 1.22        | 246.89       | 7.31         | 2.84  |

### 3oa racemic mixture:



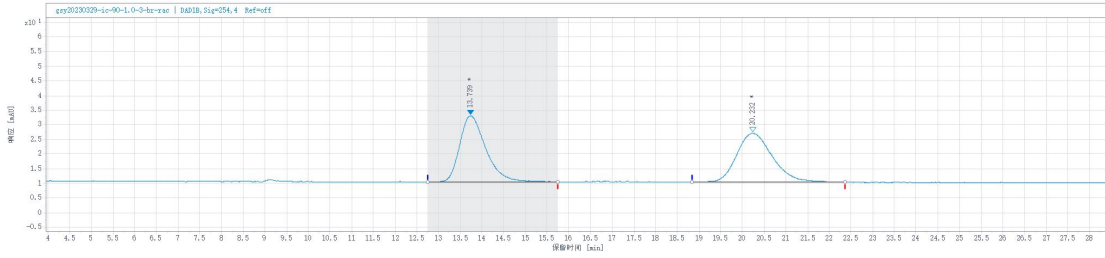

Signal: DAD1B, Sig=254, 4 Ref=off

| RetTime [min] | width [min] | Arer [mAU*s] | Height [mAU] | Area% |
|---------------|-------------|--------------|--------------|-------|
| 13.7          | 3.00        | 941.58       | 22.57        | 50.07 |
| 20.2          | 3.51        | 938.81       | 16.63        | 49.93 |

### 30a

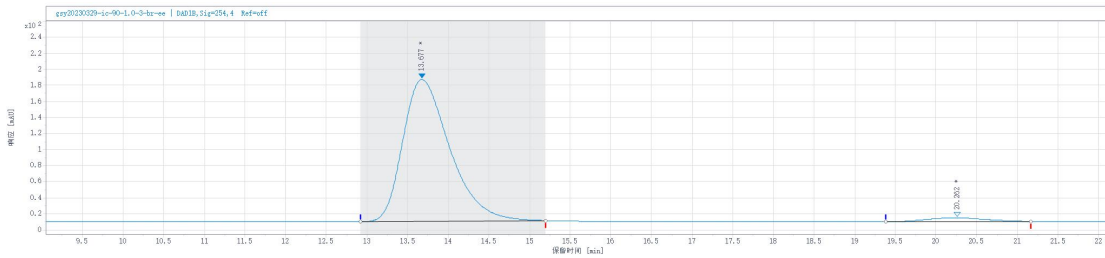

Signal: DAD1B, Sig=254, 4 Ref=off

| RetTime [min] | width [min] | Arer [mAU*s] | Height [mAU] | Area% |
|---------------|-------------|--------------|--------------|-------|
| 13.7          | 2.27        | 7098.35      | 176.77       | 96.82 |
| 20.3          | 1.78        | 232.81       | 4.58         | 3.18  |

### 3pa racemic mixture:

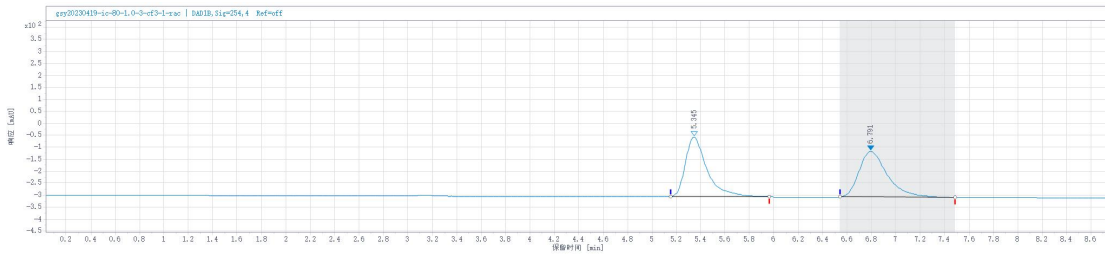

Signal: DAD1B, Sig=254, 4 Ref=off

| RetTime [min] | width [min] | Arer [mAU*s] | Height [mAU] | Area% |
|---------------|-------------|--------------|--------------|-------|
| 5.34          | 0.81        | 3057.53      | 247.47       | 50.03 |
| 6.79          | 0.94        | 3053.77      | 189.70       | 49.97 |

### 3pa

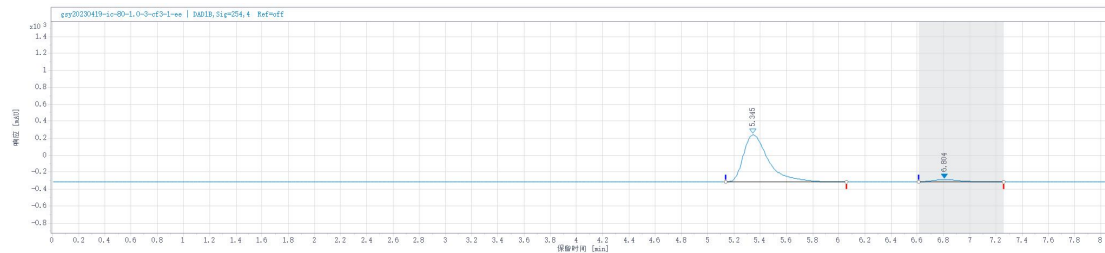

Signal: DAD1B, Sig=254, 4 Ref=off

| RetTime [min] | width [min] | Arer [mAU*s] | Height [mAU] | Area% |
|---------------|-------------|--------------|--------------|-------|
| 5.34          | 0.92        | 7393.46      | 554.57       | 94.65 |
| 6.80          | 0.65        | 418.30       | 28.29        | 5.35  |

### 3qa racemic mixture:

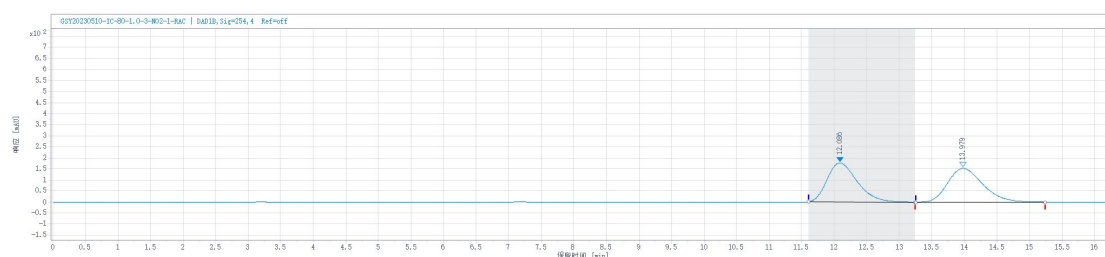

Signal: DAD1B, Sig=254, 4 Ref=off

| RetTime [min] | width [min] | Arer [mAU*s] | Height [mAU] | Area% |
|---------------|-------------|--------------|--------------|-------|
| 12.1          | 1.64        | 5689.30      | 177.31       | 49.75 |
| 14.0          | 1.99        | 5746.86      | 152.93       | 50.25 |

### 3qa

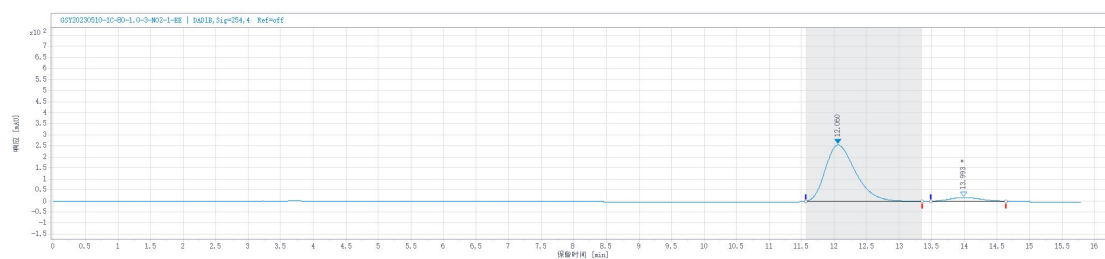

Signal: DAD1B, Sig=254, 4 Ref=off

| RetTime [min] | width [min] | Arer [mAU*s] | Height [mAU] | Area% |
|---------------|-------------|--------------|--------------|-------|
| 12.1          | 1.79        | 8180.31      | 254.83       | 93.29 |
| 14.0          | 1.15        | 588.75       | 17.40        | 6.71  |

### 3ra racemic mixture:

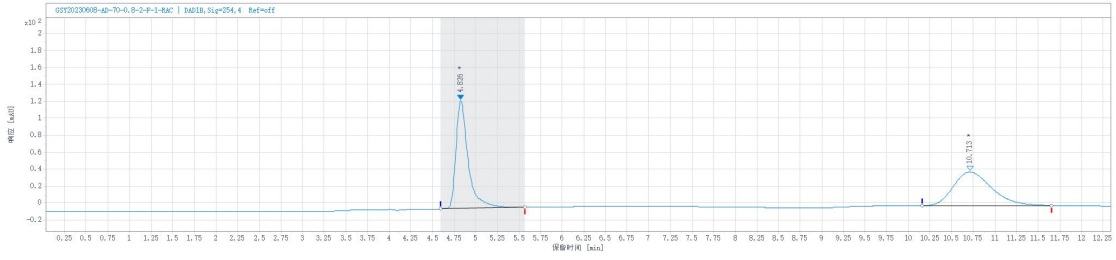

Signal: DAD1B, Sig=254, 4 Ref=off

| RetTime [min] | width [min] | Arer [mAU*s] | Height [mAU] | Area% |
|---------------|-------------|--------------|--------------|-------|
| 4.83          | 0.97        | 1256.17      | 127.32       | 50.60 |
| 10.7          | 1.49        | 1226.44      | 39.67        | 49.40 |

### 3ra

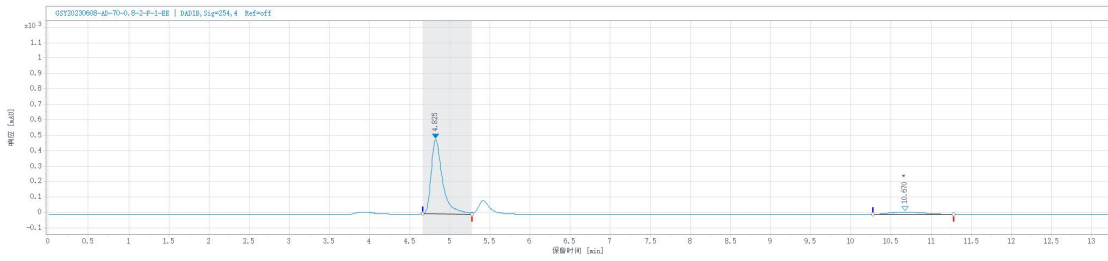

Signal: DAD1B, Sig=254, 4 Ref=off

| RetTime [min] | width [min] | Arer [mAU*s] | Height [mAU] | Area% |
|---------------|-------------|--------------|--------------|-------|
| 4.83          | 0.61        | 4765.74      | 483.49       | 92.06 |
| 10.7          | 1.00        | 410.79       | 14.59        | 7.94  |

### 3sa racemic mixture:

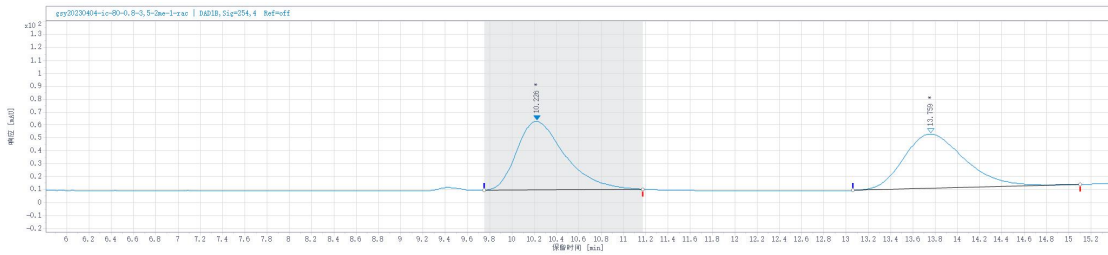

Signal: DAD1B, Sig=254, 4 Ref=off

| RetTime [min] | width [min] | Arer [mAU*s] | Height [mAU] | Area% |
|---------------|-------------|--------------|--------------|-------|
| 10.2          | 1.42        | 1595.44      | 53.09        | 50.01 |
| 13.8          | 2.04        | 1594.69      | 42.01        | 49.99 |

### 3sa

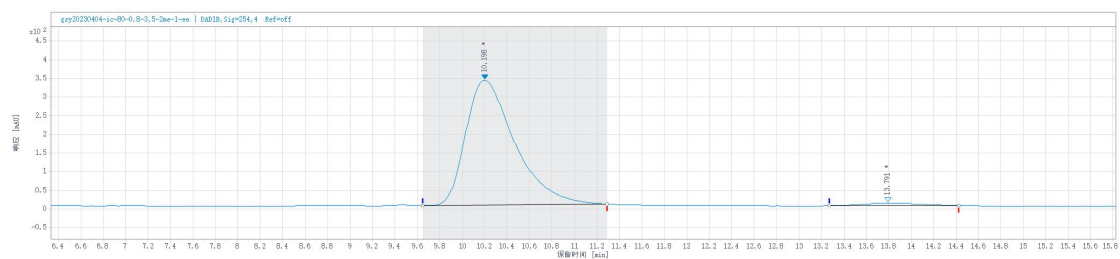

Signal: DAD1B, Sig=254, 4 Ref=off

| RetTime [min] | width [min] | Arer [mAU*s] | Height [mAU] | Area% |
|---------------|-------------|--------------|--------------|-------|
| 10.2          | 1.65        | 10155.99     | 334.31       | 97.67 |
| 13.8          | 1.15        | 242.29       | 7.21         | 2.33  |

### 3ta racemic mixture:

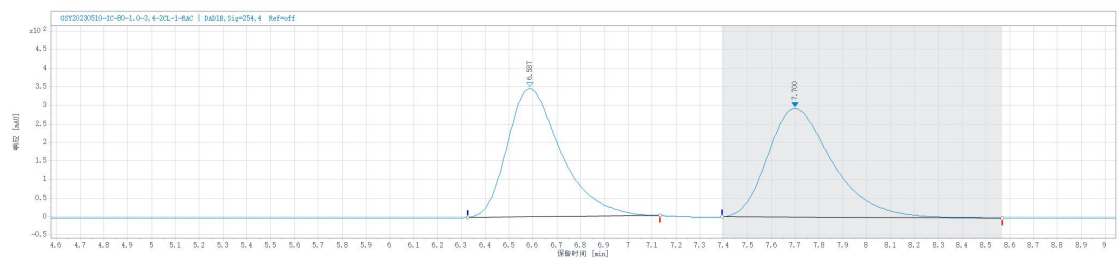

Signal: DAD1B, Sig=254, 4 Ref=off

| RetTime [min] | width [min] | Arer [mAU*s] | Height [mAU] | Area% |
|---------------|-------------|--------------|--------------|-------|
| 6.59          | 0.81        | 5416.84      | 346.29       | 49.52 |
| 7.70          | 1.17        | 5521.42      | 293.29       | 50.48 |

### 3ta

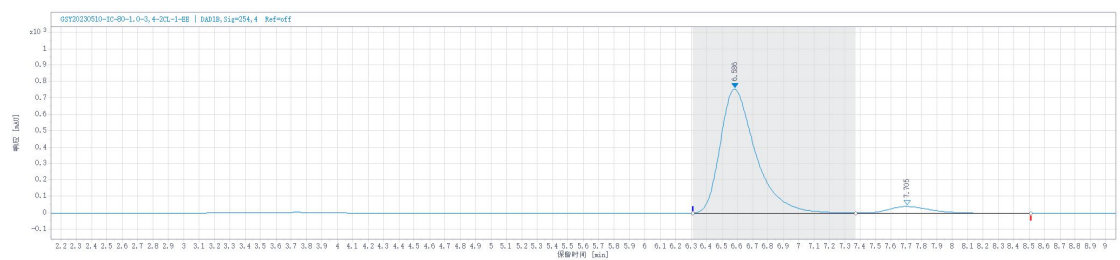

Signal: DAD1B, Sig=254, 4 Ref=off

| RetTime [min] | width [min] | Arer [mAU*s] | Height [mAU] | Area% |
|---------------|-------------|--------------|--------------|-------|
| 6.59          | 1.06        | 12099.60     | 756.51       | 93.80 |
| 7.71          | 1.14        | 800.36       | 41.50        | 6.20  |

### 3ua racemic mixture:

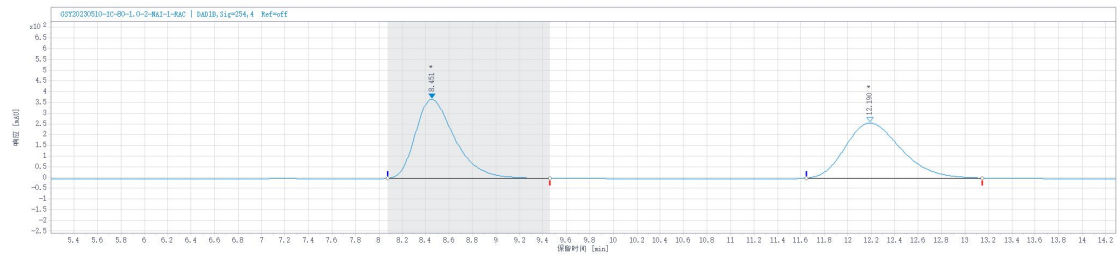

Signal: DAD1B, Sig=254, 4 Ref=off

| RetTime [min] | width [min] | Arer [mAU*s] | Height [mAU] | Area% |
|---------------|-------------|--------------|--------------|-------|
| 8.45          | 1.38        | 8580.44      | 368.03       | 50.45 |
| 12.2          | 1.49        | 8427.87      | 257.00       | 49.55 |

### 3ua

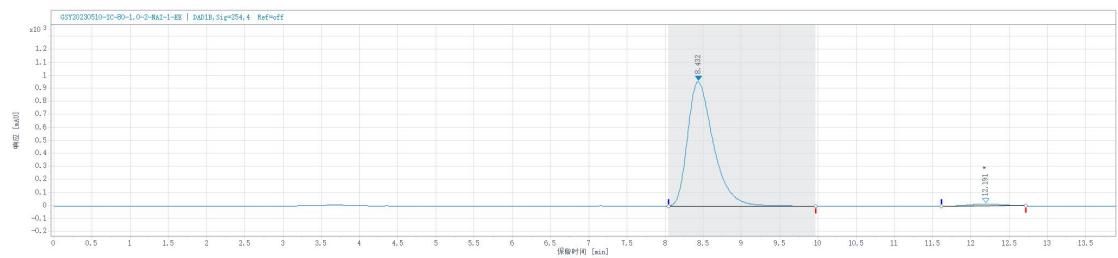

Signal: DAD1B, Sig=254, 4 Ref=off

| RetTime [min] | width [min] | Arer [mAU*s] | Height [mAU] | Area% |
|---------------|-------------|--------------|--------------|-------|
| 8.43          | 1.93        | 22340.54     | 954.86       | 97.84 |
| 12.2          | 1.10        | 492.13       | 16.45        | 2.16  |

### 3va racemic mixture:

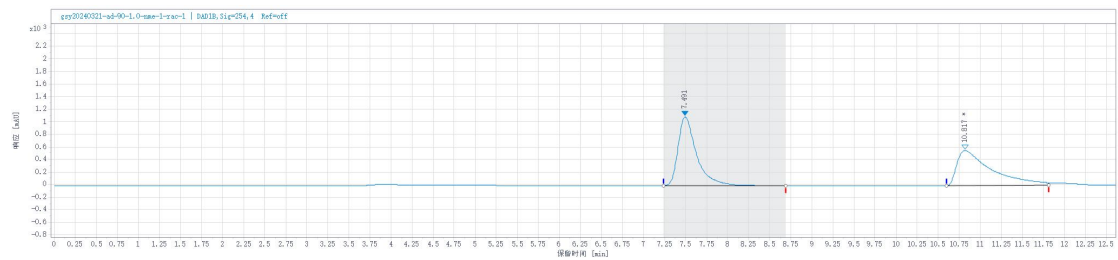

Signal: DAD1B, Sig=254, 4 Ref=off

| RetTime [min] | width [min] | Arer [mAU*s] | Height [mAU] | Area% |
|---------------|-------------|--------------|--------------|-------|
| 7.49          | 1.45        | 16535.91     | 1089.95      | 51.30 |
| 10.8          | 1.22        | 15696.56     | 553.73       | 48.70 |

### 3va

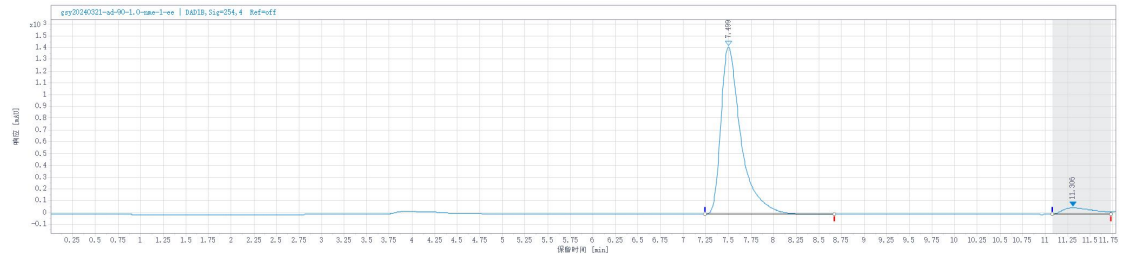

**3ab racemic mixture:**

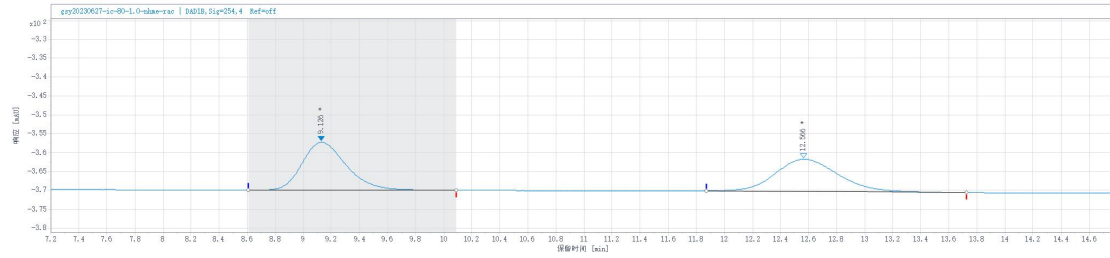

Signal: DAD1B, Sig=254, 4 Ref=off

| RetTime [min] | width [min] | Area [mAU*s] | Height [mAU] | Area% |
|---------------|-------------|--------------|--------------|-------|
| 9.13          | 1.48        | 279.94       | 12.71        | 50.93 |
| 12.6          | 1.85        | 269.77       | 8.59         | 49.07 |

**3ab**

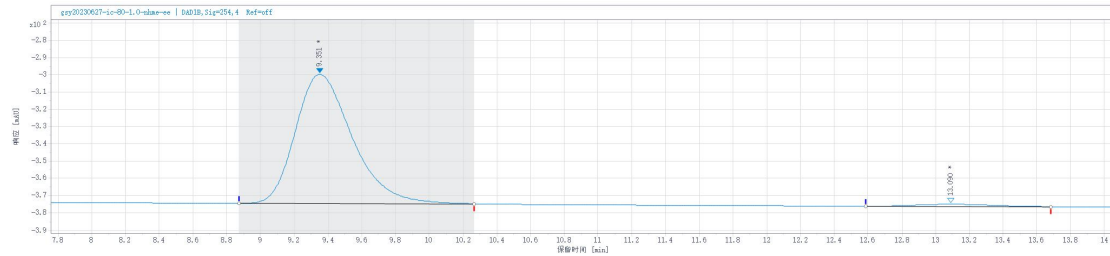

Signal: DAD1B, Sig=254, 4 Ref=off

| RetTime [min] | width [min] | Area [mAU*s] | Height [mAU] | Area% |
|---------------|-------------|--------------|--------------|-------|
| 9.35          | 1.39        | 1752.19      | 74.91        | 97.91 |
| 13.1          | 1.10        | 37.45        | 1.22         | 2.09  |

**3ac racemic mixture:**

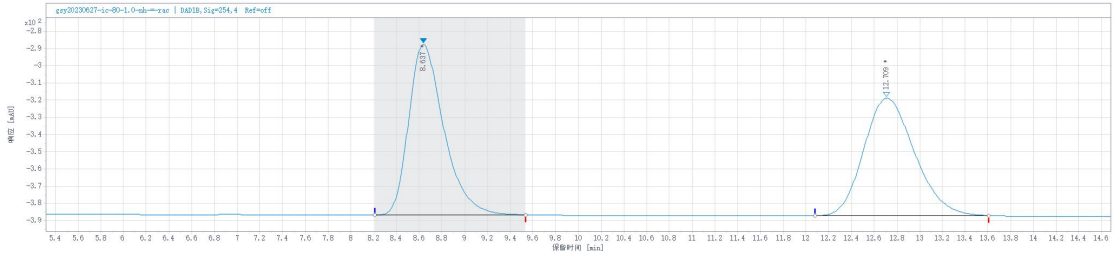

Signal: DAD1B, Sig=254, 4 Ref=off

| RetTime [min] | width [min] | Arer [mAU*s] | Height [mAU] | Area% |
|---------------|-------------|--------------|--------------|-------|
| 8.64          | 1.33        | 2130.84      | 99.28        | 50.08 |
| 12.7          | 1.53        | 2123.98      | 68.41        | 49.92 |

### 3ac

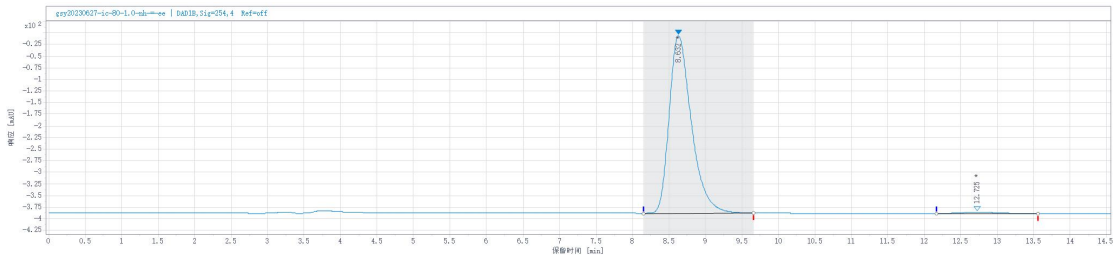

Signal: DAD1B, Sig=254, 4 Ref=off

| RetTime [min] | width [min] | Arer [mAU*s] | Height [mAU] | Area% |
|---------------|-------------|--------------|--------------|-------|
| 8.63          | 1.51        | 8094.62      | 381.98       | 98.81 |
| 12.7          | 1.39        | 97.47        | 3.17         | 1.19  |

### 3ad racemic mixture:

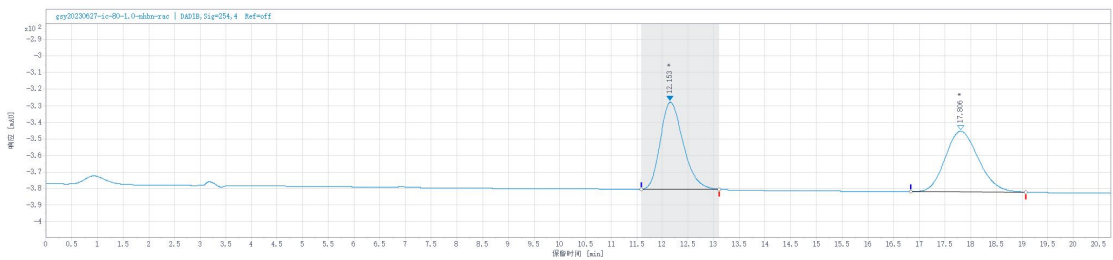

Signal: DAD1B, Sig=254, 4 Ref=off

| RetTime [min] | width [min] | Arer [mAU*s] | Height [mAU] | Area% |
|---------------|-------------|--------------|--------------|-------|
| 12.2          | 1.53        | 1630.54      | 52.57        | 49.71 |
| 17.8          | 2.24        | 1649.28      | 36.63        | 50.29 |

### 3ad

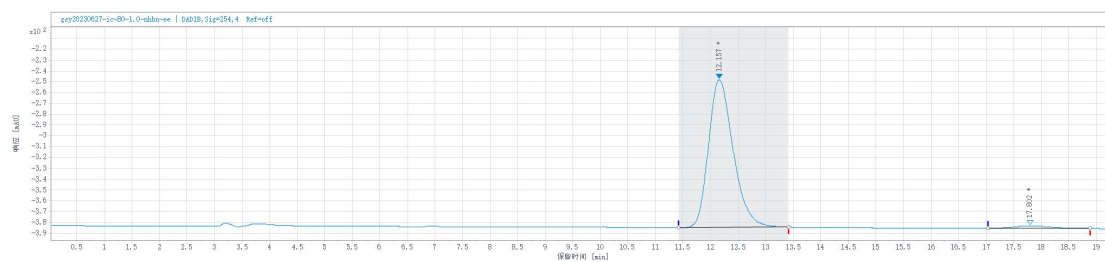

Signal: DAD1B, Sig=254, 4 Ref=off

| RetTime [min] | width [min] | Area [mAU*s] | Height [mAU] | Area% |
|---------------|-------------|--------------|--------------|-------|
| 12.2          | 2.00        | 4240.58      | 136.18       | 97.57 |
| 17.8          | 1.85        | 105.56       | 2.37         | 2.43  |

### 3ae racemic mixture:

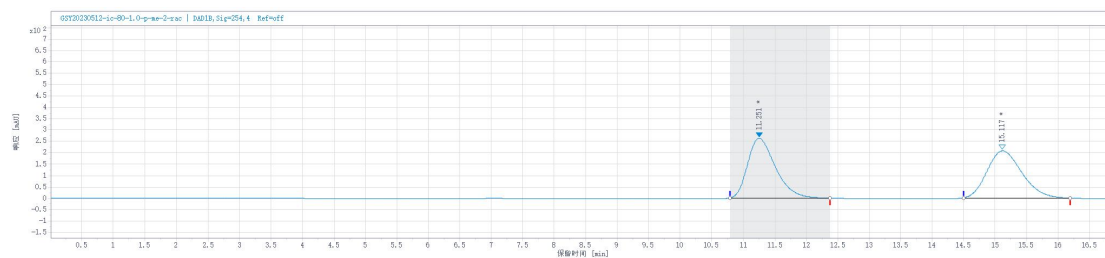

Signal: DAD1B, Sig=254, 4 Ref=off

| RetTime [min] | width [min] | Area [mAU*s] | Height [mAU] | Area% |
|---------------|-------------|--------------|--------------|-------|
| 11.3          | 1.58        | 8037.74      | 262.58       | 50.34 |
| 15.1          | 1.69        | 7928.36      | 206.51       | 49.66 |

### 3ae

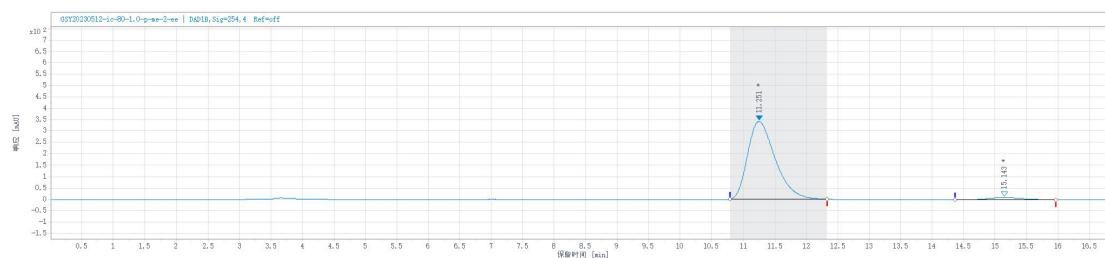

Signal: DAD1B, Sig=254, 4 Ref=off

| RetTime [min] | width [min] | Area [mAU*s] | Height [mAU] | Area% |
|---------------|-------------|--------------|--------------|-------|
| 11.3          | 1.55        | 10401.98     | 341.86       | 96.68 |
| 15.1          | 1.60        | 357.19       | 9.45         | 3.32  |

### 3af racemic mixture:



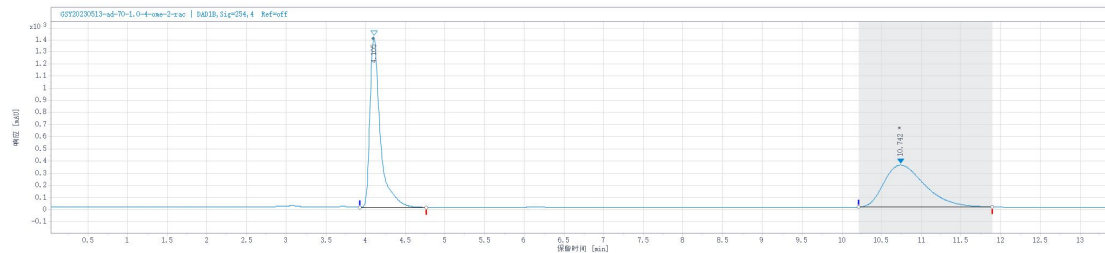

Signal: DAD1B, Sig=254, 4 Ref=off

| RetTime [min] | width [min] | Arer [mAU*s] | Height [mAU] | Area% |
|---------------|-------------|--------------|--------------|-------|
| 4.10          | 0.83        | 12682.65     | 1406.65      | 50.39 |
| 10.7          | 1.68        | 12487.55     | 347.77       | 49.61 |

### 3af

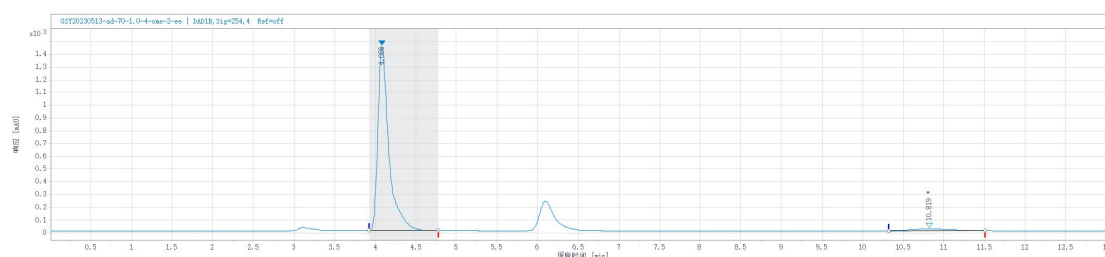

Signal: DAD1B, Sig=254, 4 Ref=off

| RetTime [min] | width [min] | Arer [mAU*s] | Height [mAU] | Area% |
|---------------|-------------|--------------|--------------|-------|
| 4.09          | 0.85        | 13567.88     | 1438.70      | 96.87 |
| 10.8          | 1.18        | 438.27       | 13.22        | 3.13  |

### 3ag racemic mixture:

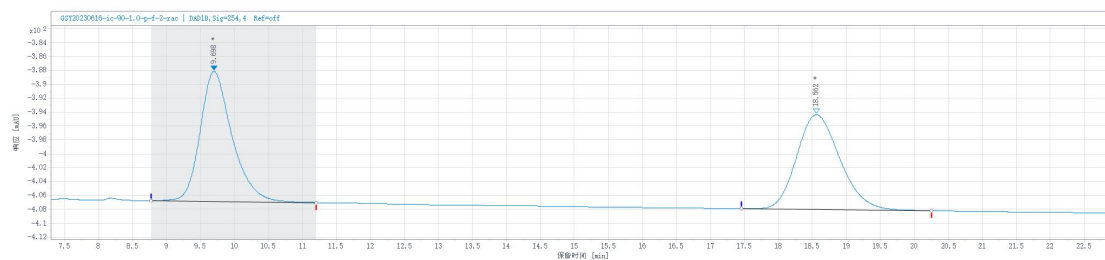

Signal: DAD1B, Sig=254, 4 Ref=off

| RetTime [min] | width [min] | Arer [mAU*s] | Height [mAU] | Area% |
|---------------|-------------|--------------|--------------|-------|
| 9.70          | 2.43        | 613.29       | 18.73        | 50.40 |
| 18.6          | 2.80        | 603.67       | 13.65        | 49.60 |

### 3ag

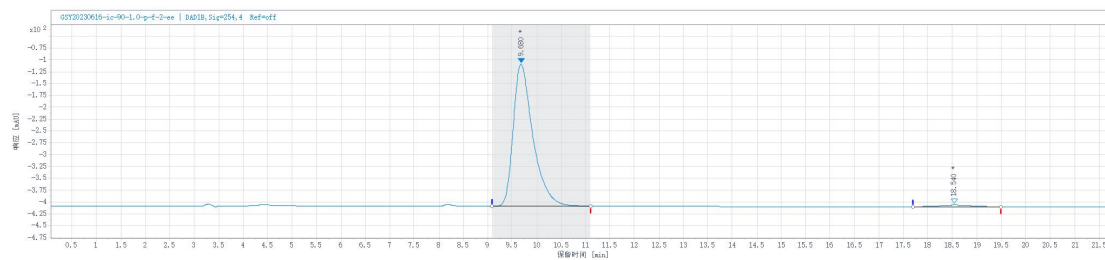

Signal: DAD1B, Sig=254,4 Ref=off

| RetTime [min] | width [min] | Arer [mAU*s] | Height [mAU] | Area% |
|---------------|-------------|--------------|--------------|-------|
| 9.68          | 2.02        | 8387.63      | 299.49       | 98.26 |
| 18.5          | 1.80        | 148.56       | 3.42         | 1.74  |

### 3ah racemic mixture:

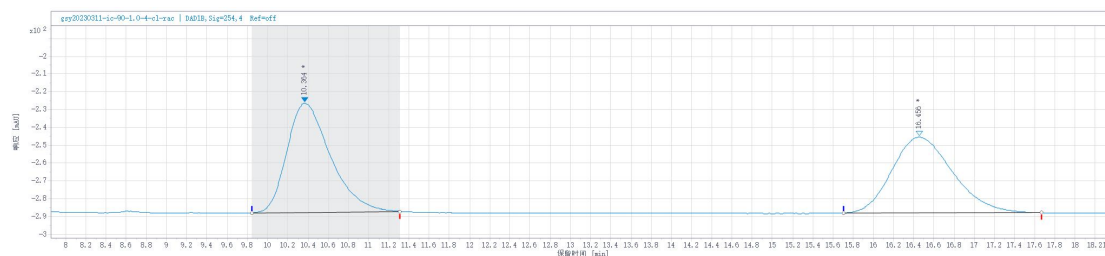

Signal: DAD1B, Sig=254,4 Ref=off

| RetTime [min] | width [min] | Arer [mAU*s] | Height [mAU] | Area% |
|---------------|-------------|--------------|--------------|-------|
| 10.4          | 1.46        | 1835.10      | 61.27        | 50.78 |
| 16.5          | 1.96        | 1778.53      | 42.49        | 49.22 |

### 3ah

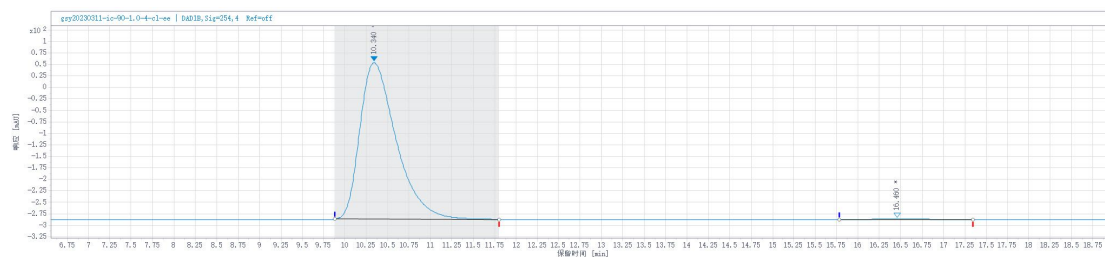

Signal: DAD1B, Sig=254,4 Ref=off

| RetTime [min] | width [min] | Arer [mAU*s] | Height [mAU] | Area% |
|---------------|-------------|--------------|--------------|-------|
| 10.3          | 1.92        | 10047.43     | 340.29       | 98.92 |
| 16.5          | 1.56        | 109.37       | 2.66         | 1.08  |

### 3ai racemic mixture:

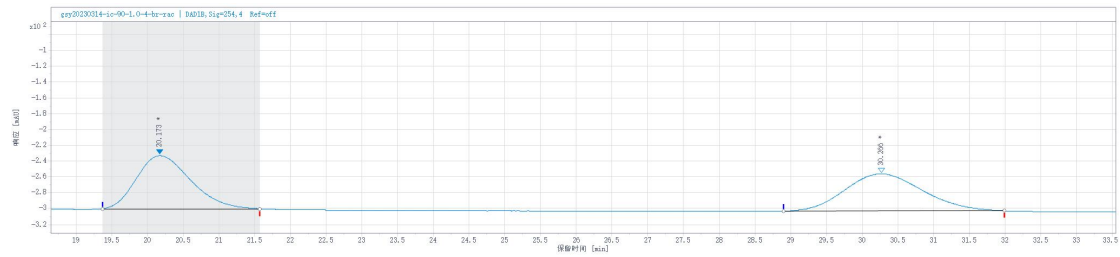

Signal: DAD1B, Sig=254, 4 Ref=off

| RetTime [min] | width [min] | Arer [mAU*s] | Height [mAU] | Area% |
|---------------|-------------|--------------|--------------|-------|
| 20.2          | 2.20        | 3522.17      | 67.11        | 49.85 |
| 30.3          | 3.08        | 3543.22      | 46.84        | 50.15 |

3ai

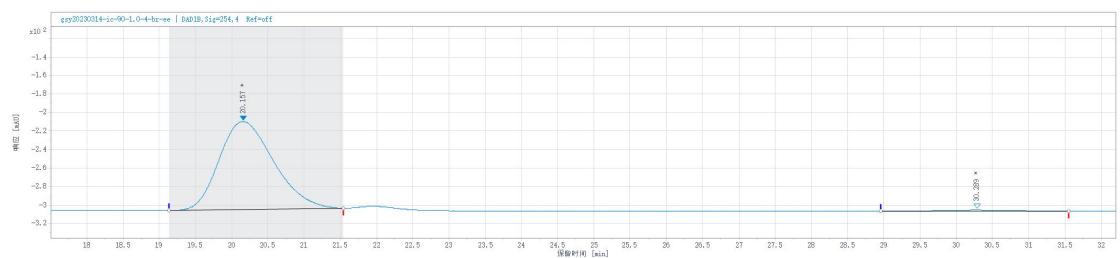

Signal: DAD1B, Sig=254, 4 Ref=off

| RetTime [min] | width [min] | Arer [mAU*s] | Height [mAU] | Area% |
|---------------|-------------|--------------|--------------|-------|
| 20.2          | 2.40        | 4985.51      | 95.16        | 98.27 |
| 30.3          | 2.60        | 87.84        | 1.33         | 1.73  |

3aj racemic mixture:

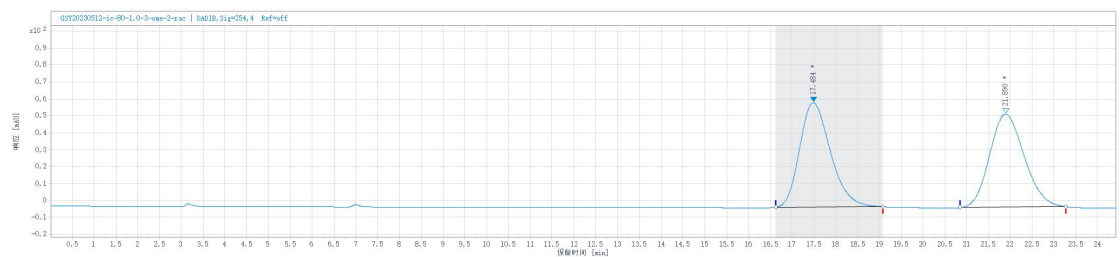

Signal: DAD1B, Sig=254, 4 Ref=off

| RetTime [min] | width [min] | Arer [mAU*s] | Height [mAU] | Area% |
|---------------|-------------|--------------|--------------|-------|
| 17.5          | 2.45        | 3023.17      | 61.69        | 49.98 |
| 21.9          | 2.42        | 3025.90      | 55.01        | 50.02 |

### 3aj

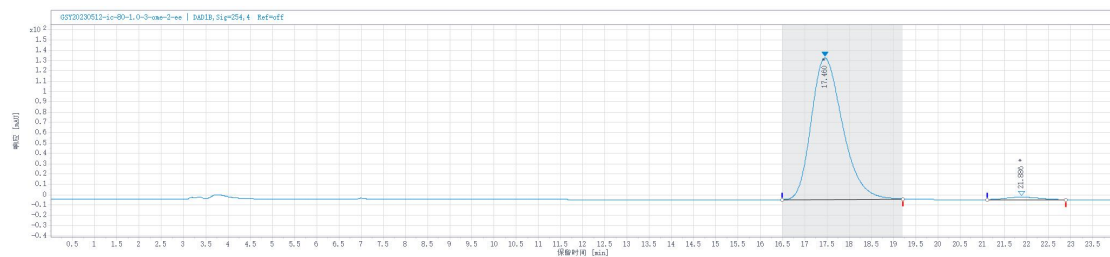

Signal: DAD1B, Sig=254, 4 Ref=off

| RetTime [min] | width [min] | Arer [mAU*s] | Height [mAU] | Area% |
|---------------|-------------|--------------|--------------|-------|
| 17.5          | 2.72        | 6708.98      | 137.02       | 98.10 |
| 21.9          | 1.76        | 129.69       | 2.54         | 1.90  |

### 3ak racemic mixture:

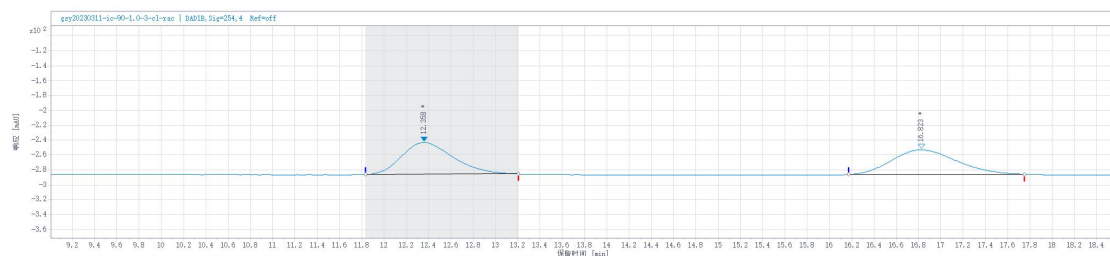

Signal: DAD1B, Sig=254, 4 Ref=off

| RetTime [min] | width [min] | Arer [mAU*s] | Height [mAU] | Area% |
|---------------|-------------|--------------|--------------|-------|
| 12.4          | 1.37        | 1371.00      | 42.50        | 50.69 |
| 16.8          | 1.58        | 1333.70      | 32.94        | 49.31 |

### 3ak

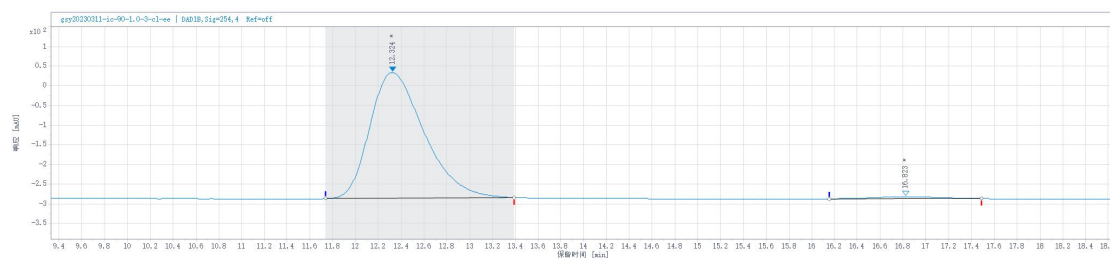

Signal: DAD1B, Sig=254, 4 Ref=off

| RetTime [min] | width [min] | Arer [mAU*s] | Height [mAU] | Area% |
|---------------|-------------|--------------|--------------|-------|
| 12.3          | 1.65        | 10557.91     | 319.87       | 98.21 |
| 16.8          | 1.34        | 191.96       | 5.08         | 1.79  |

### 3al racemic mixture:

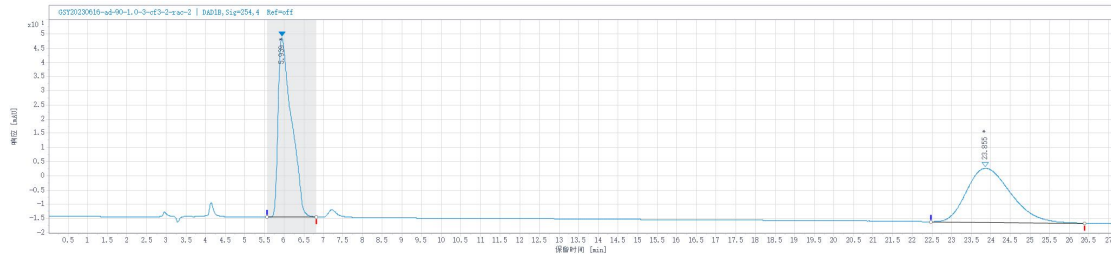

Signal: DAD1B, Sig=254, 4 Ref=off

| RetTime [min] | width [min] | Area [mAU*s] | Height [mAU] | Area% |
|---------------|-------------|--------------|--------------|-------|
| 5.94          | 1.26        | 1490.19      | 63.21        | 49.96 |
| 23.9          | 3.91        | 1492.37      | 19.03        | 50.04 |

### 3al

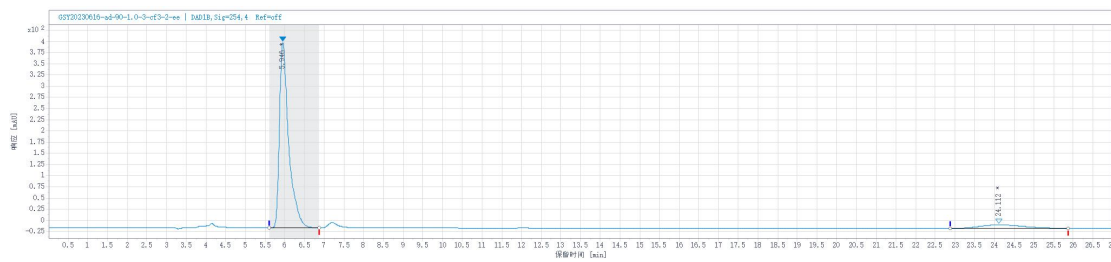

Signal: DAD1B, Sig=254, 4 Ref=off

| RetTime [min] | width [min] | Area [mAU*s] | Height [mAU] | Area% |
|---------------|-------------|--------------|--------------|-------|
| 5.95          | 1.28        | 6740.55      | 413.54       | 91.65 |
| 24.1          | 2.99        | 614.24       | 8.03         | 8.35  |

### 3am racemic mixture:

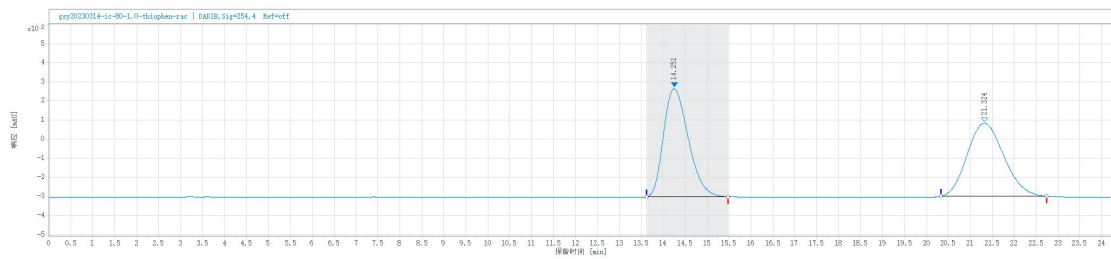

Signal: DAD1B, Sig=254, 4 Ref=off

| RetTime [min] | width [min] | Area [mAU*s] | Height [mAU] | Area% |
|---------------|-------------|--------------|--------------|-------|
| 14.3          | 1.86        | 22191.77     | 566.55       | 49.96 |
| 21.3          | 2.41        | 22230.57     | 382.69       | 50.04 |

### 3am

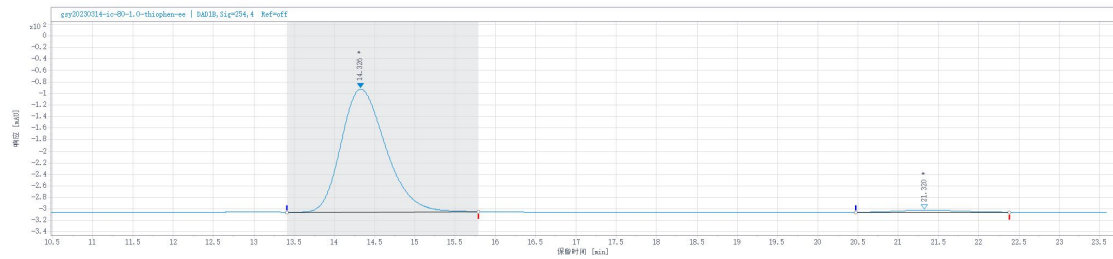

Signal: DAD1B, Sig=254, 4 Ref=off

| RetTime [min] | width [min] | Arer [mAU*s] | Height [mAU] | Area% |
|---------------|-------------|--------------|--------------|-------|
| 14.3          | 2.37        | 8190.48      | 213.45       | 97.62 |
| 21.3          | 1.91        | 199.89       | 3.67         | 2.38  |

### 3an racemic mixture:

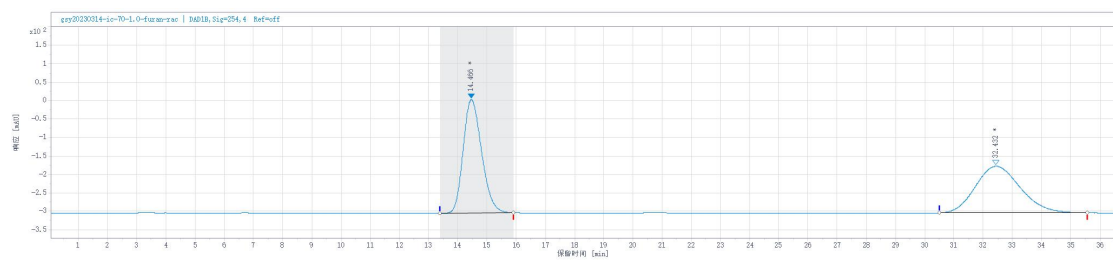

Signal: DAD1B, Sig=254, 4 Ref=off

| RetTime [min] | width [min] | Arer [mAU*s] | Height [mAU] | Area% |
|---------------|-------------|--------------|--------------|-------|
| 14.5          | 2.52        | 13481.13     | 306.91       | 49.94 |
| 32.4          | 5.07        | 13514.97     | 126.01       | 50.06 |

### 3an

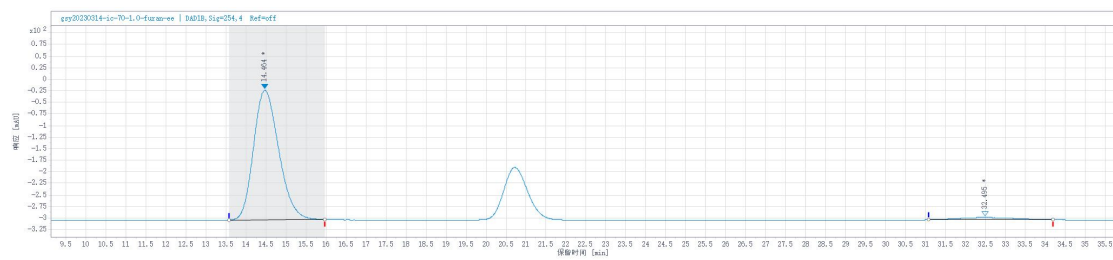

Signal: DAD1B, Sig=254, 4 Ref=off

| RetTime [min] | width [min] | Arer [mAU*s] | Height [mAU] | Area% |
|---------------|-------------|--------------|--------------|-------|
| 14.5          | 2.40        | 12274.57     | 279.87       | 96.52 |
| 32.5          | 3.11        | 442.53       | 4.73         | 3.48  |

### 4aa racemic mixture:

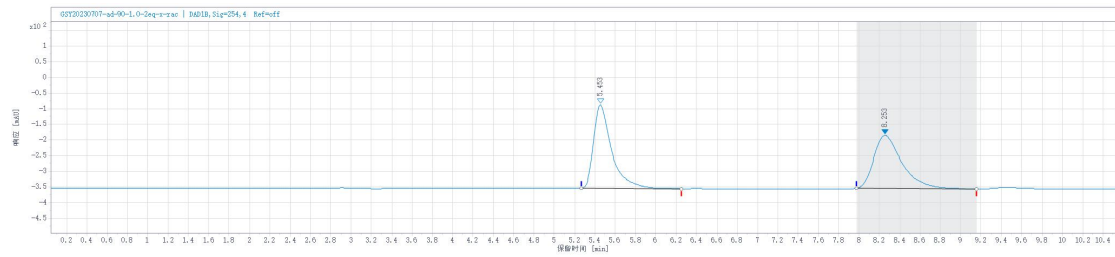

Signal: DAD1B, Sig=254, 4 Ref=off

| RetTime [min] | width [min] | Arer [mAU*s] | Height [mAU] | Area% |
|---------------|-------------|--------------|--------------|-------|
| 5.45          | 0.99        | 3293.22      | 266.90       | 50.30 |
| 8.25          | 1.18        | 3253.44      | 169.28       | 49.70 |

#### 4aa

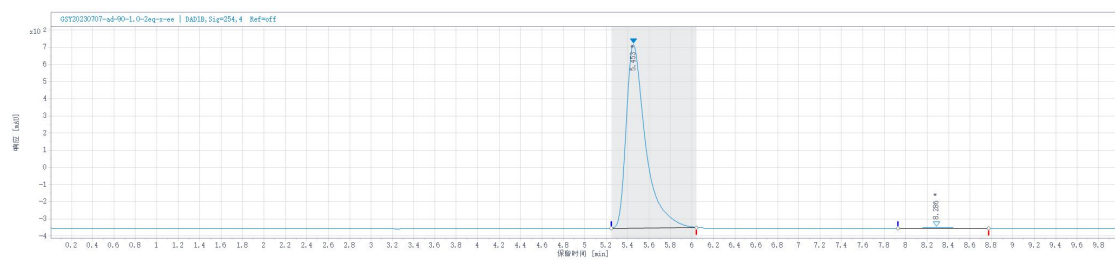

Signal: DAD1B, Sig=254, 4 Ref=off

| RetTime [min] | width [min] | Arer [mAU*s] | Height [mAU] | Area% |
|---------------|-------------|--------------|--------------|-------|
| 5.45          | 0.80        | 13438.68     | 1068.52      | 99.22 |
| 8.29          | 0.85        | 105.44       | 5.63         | 0.78  |

#### 5aa racemic mixture:

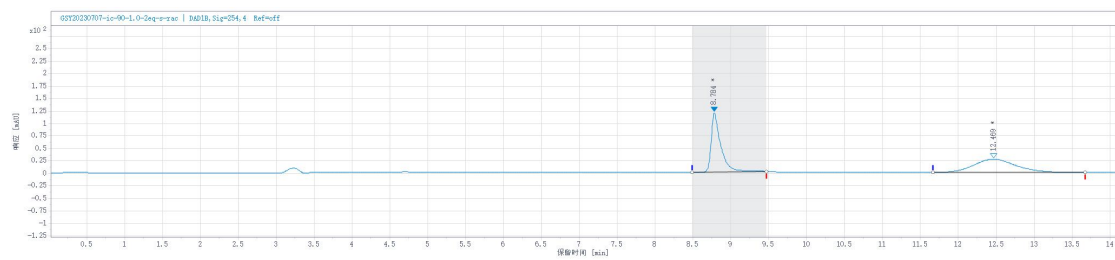

Signal: DAD1B, Sig=254, 4 Ref=off

| RetTime [min] | width [min] | Arer [mAU*s] | Height [mAU] | Area% |
|---------------|-------------|--------------|--------------|-------|
| 8.78          | 0.97        | 1039.07      | 118.52       | 49.67 |
| 12.5          | 2.01        | 1053.01      | 27.02        | 50.33 |

## 5aa

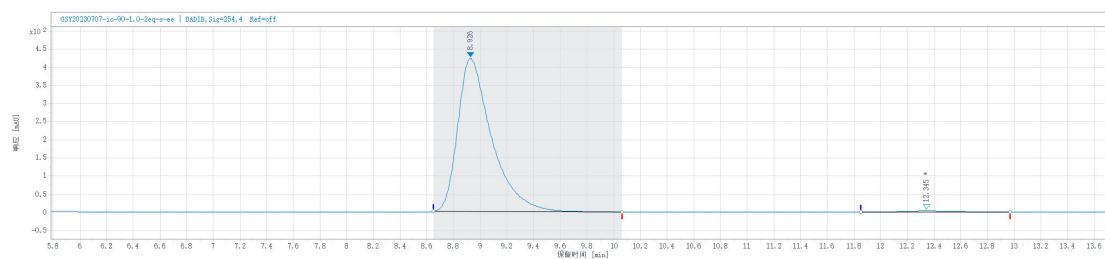

Signal: DAD1B, Sig=254, 4 Ref=off

| RetTime [min] | width [min] | Area [mAU*s] | Height [mAU] | Area% |
|---------------|-------------|--------------|--------------|-------|
| 8.93          | 1.41        | 7451.70      | 421.62       | 99.03 |
| 12.3          | 1.12        | 73.02        | 3.08         | 0.97  |

## Part IV Crystal data

(*R*)-**3aa** (25mg): single crystals are formed in THF (0.7ml) at room temperature about 5 days.

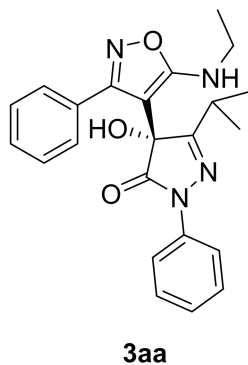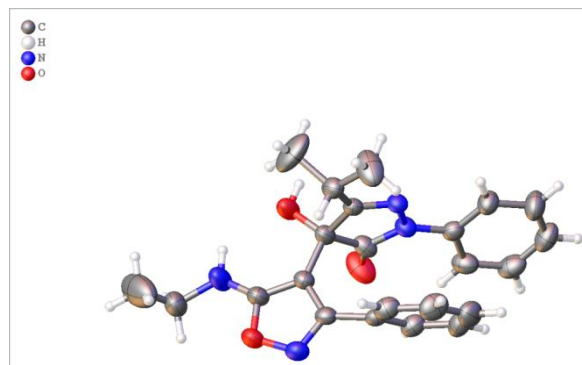



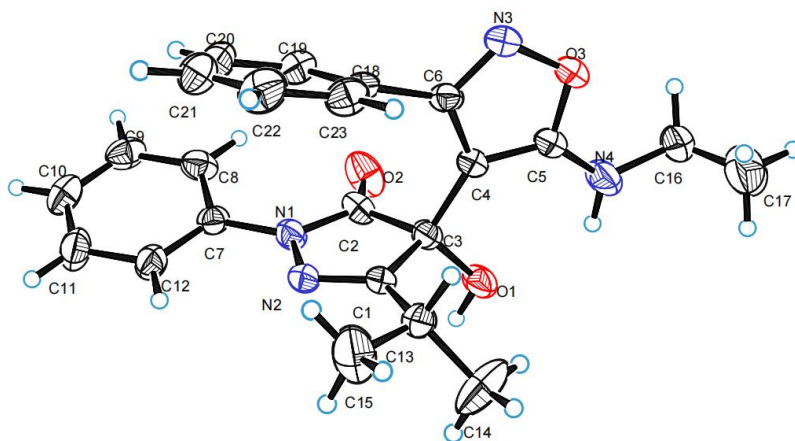

CCDC:2335999

|                                    |                                                               |
|------------------------------------|---------------------------------------------------------------|
| Identification code                | SCD-GSY2023-0706_auto                                         |
| Empirical formula                  | C <sub>23</sub> H <sub>24</sub> N <sub>4</sub> O <sub>3</sub> |
| Formula weight                     | 404.46                                                        |
| Temperature/K                      | 293(2)                                                        |
| Crystal system                     | orthorhombic                                                  |
| Space group                        | P2 <sub>1</sub> 2 <sub>1</sub> 2 <sub>1</sub>                 |
| a/Å                                | 8.99824(7)                                                    |
| b/Å                                | 13.13119(9)                                                   |
| c/Å                                | 17.79770(13)                                                  |
| α/°                                | 90                                                            |
| β/°                                | 90                                                            |
| γ/°                                | 90                                                            |
| Volume/Å <sup>3</sup>              | 2102.93(3)                                                    |
| Z                                  | 4                                                             |
| ρ <sub>calc</sub> /cm <sup>3</sup> | 1.277                                                         |
| μ/mm <sup>-1</sup>                 | 0.701                                                         |
| F(000)                             | 856.0                                                         |
| Crystal size/mm <sup>3</sup>       | 0.22 × 0.19 × 0.18                                            |
| Radiation                          | Cu Kα (λ = 1.54184)                                           |
| 2θ range for data collection/°     | 8.368 to 145.812                                              |
| Index ranges                       | -9 ≤ h ≤ 11, -16 ≤ k ≤ 16, -21 ≤ l ≤ 22                       |
| Reflections collected              | 15262                                                         |
| Independent reflections            | 4132 [R <sub>int</sub> = 0.0284, R <sub>sigma</sub> = 0.0172] |
| Data/restraints/parameters         | 4132/0/276                                                    |

|                                                |                                  |
|------------------------------------------------|----------------------------------|
| Goodness-of-fit on $F^2$                       | 1.079                            |
| Final R indexes [ $I \geq 2\sigma(I)$ ]        | $R_1 = 0.0434$ , $wR_2 = 0.1143$ |
| Final R indexes [all data]                     | $R_1 = 0.0439$ , $wR_2 = 0.1151$ |
| Largest diff. peak/hole / $e \text{ \AA}^{-3}$ | 0.32/-0.23                       |
| Flack parameter                                | 0.04(6)                          |
